# Supplementary material for: MagIC-Cryo-EM: Structural determination on magnetic beads for scarce macromolecules in heterogeneous samples
Source: bioRxiv preprint, doi:10.1101/2024.01.21.576499, version 7 (2025-05-01)
Supplement: Table S5 [file 576499_file03.xlsx]

## Sheet: filtered
							Input_inter_F4	Input_inter_F5	Input_meta_F5	MagIC_inter_F4	MagIC_inter_F5	MagIC_meta_F5
Accession	Description	ΣCoverage	Σ# Proteins	Σ# Unique Peptides	Σ# Peptides	Σ# PSMs	A5: Area	B5: Area	C5: Area	D5: Area	E5: Area	F5: Area	Score A6	Coverage A6	# Peptides A6	# PSM A6	Score B6	Coverage B6	# Peptides B6	# PSM B6	Score C6	Score D6	Score E6	Score F6	Coverage C6	Coverage D6	Coverage E6	Coverage F6	# Peptides C6	# Peptides D6	# Peptides E6	# Peptides F6	# PSM C6	# PSM D6	# PSM E6	# PSM F6	# AAs	MW [kDa]	calc. pI	comment
XBXL10_1g8279	XBmRNA15659| krt18.1.L	6.42	3	1	2	35	8.7171e+10	5.03039e+10	41248418266	1.39504e+10	45688204091	43680490412	9.1488	1.61	1	5	9.32585	1.61	1	5	9.23068	9.14529	10.9553	10.9213	1.61	6.42	1.61	1.61	1	2	1	1	6	7	6	6	436	48.2963	5.30029	keratin
XBXL10_1g38957	XBmRNA73513| krt51.L	6.04	1	1	2	49	60787022168	42043828040	38071526344	2.88528e+10	39374069632	34696907176	11.5143	1.69	1	8	11.3811	1.69	1	8	14.3273	11.1084	14.8154	13.0357	1.69	1.69	6.04	1.69	1	1	2	1	9	7	9	8	414	45.3957	5.47803	keratin
XBXL10_1g38958	XBmRNA73514| krt50.L	3.27	2	1	2	49	32550223282	42043828040	38071526344	2.88528e+10	39374069632	34696907176	11.5143	3.27	2	9	11.3811	1.53	1	8	14.3273	11.1084	14.8154	13.0357	1.53	1.53	1.53	1.53	1	1	1	1	9	7	8	8	459	49.2873	5.98584	annotation error
XBXL10_1g632	XBmRNA734| LOC121402019	73.44	2	5	21	269	8.85056e+09	3.98246e+10	13266929321	7.89148e+08	2.1667e+08	19264787	205.14	67.81	18	57	424.248	73.44	21	109	318.045	69.5127	25.6008	4.80412	67.81	35.63	24.38	8.44	18	5	3	1	81	15	6	1	320	35.1819	5.24951	Intelectin-1-like precursor
XBXL10_1g634	XBmRNA737| cgl.2.L	73.44	2	5	21	230	8.85056e+09	3.98246e+10	13266929321	3.13767e+08	14675819		192.435	67.81	18	57	289.136	73.44	21	90	222.961	43.6432	6.10379		67.81	35.63	15.94		18	5	2		70	11	2		320	35.2598	5.24951
XBXL10_1g3658	XBmRNA6678| cgl.2.S	66.77	3	2	21	172	8.85056e+09	3.98246e+10	13266929321	3.65288e+07			116.754	61.02	17	41	253.902	66.77	21	76	159.207	3.91384			61.02	5.11			19	1			54	1			313	34.2685	5.88428
XBXL10_1g3659	XBmRNA6679| LOC121399267	66.77	2	1	19	158	8.85056e+09	3.98246e+10	13266929321	3.65288e+07			106.641	52.08	15	36	247.01	66.77	19	72	148.447	3.91384			61.02	5.11			17	1			49	1			313	34.2684	5.66846	Intelectin-1-like
XBXL10_1g42200	XBmRNA79328| krt12.4.S	9.6	3	2	6	80	3.66475e+10	2.29481e+10	1.98962e+10	1.25461e+10	1.99313e+10	1.78656e+10	18.347	9.33	5	11	37.2816	9.6	6	18	23.8545	25.4291	24.809	16.8285	9.33	9.33	9.33	4.53	5	5	5	4	13	14	14	10	375	42.0885	5.021	keratin
XBXL10_1g8295	XBmRNA15675| krt7.L	14.62	5	2	12	811	2.01637e+10	1.94514e+10	2.08388e+10	1.21921e+10	1.33446e+10	8.83777e+09	358.644	11.11	10	145	341.543	10.92	9	142	354.561	329.407	332.587	252.419	11.11	11.11	12.48	12.87	10	10	10	10	146	137	134	107	513	55.3597	5.70654	keratin
XBXL10_1g38935	XBmRNA73487| krt17.L	11.28	4	1	10	126	3.16027e+10	1.87844e+10	1.646e+10	1.06265e+10	16914945740	1.58967e+10	55.5168	10.84	9	22	49.2576	8.63	9	20	55.0544	51.5975	47.7361	45.2482	11.28	8.63	8.19	10.84	10	9	8	9	25	21	20	18	452	49.7499	5.30029	keratin
XBXL10_1g8290	XBmRNA15670| krt78.1.L	8.79	11	1	7	658	1.62658e+10	1.76975e+10	2.53324e+10	9.66312e+09	1.1008e+10	6.33259e+09	303.741	7.16	5	116	297.834	7.16	5	120	312.993	283.322	289.613	209.531	8.79	7.16	7.16	7.16	6	5	5	5	120	110	109	83	489	53.635	9.37842	keratin
XBXL10_1g38951	XBmRNA73508| krt57.L	4.95	1	1	3	67	60787022168	1.44505e+10	1.29403e+10	9.76377e+09	1.33249e+10	1.73695e+10	13.1865	3.01	2	9	20.557	4.95	3	12	25.4832	17.6636	21.9432	14.8832	4.95	4.95	4.95	3.01	3	3	3	2	13	11	12	10	465	49.9372	5.05908	annotation error
XBXL10_1g9050	XBmRNA16841| LOC108709196	66.19	1	2	8	157	9.67948e+09	1.37618e+10	4.12011e+09	1.15951e+08	2.08211e+08	1.49108e+08	181.769	45.32	7	46	189.738	66.19	8	53	143.264	16.5126	22.669	25.2829	45.32	33.09	23.02	40.29	6	4	2	5	37	6	6	9	139	14.85	10.0522	Histone H2A
XBXL10_1g6367	XBmRNA11963| h2ac17.L	54.68	1	1	7	147	9.67948e+09	1.37618e+10	4.12011e+09	1.15951e+08	2.08211e+08	1.49108e+08	171.184	33.81	6	43	183.955	54.68	7	50	134.158	16.5126	22.669	22.684	33.81	33.09	23.02	28.78	5	4	2	4	34	6	6	8	139	14.855	10.0962
XBXL10_1g8291	XBmRNA15671| krt62.L	11.21	12	1	13	456	1.49444e+10	1.19174e+10	1.81596e+10	8.52066e+09	1.02601e+10	8.55008e+09	151.959	9.48	11	72	180.896	9.48	11	85	257.887	128.537	146.704	86.7342	9.48	9.48	11.21	9.48	11	11	12	11	116	65	72	46	580	59.8049	5.71924	keratin
XBXL10_1g10877	XBmRNA20457| krt61.S	10.23	8	2	14	261	1.52098e+10	1.06704e+10	1.20532e+10	8.5058e+09	1.08175e+10	9.04763e+09	93.3669	10.23	13	46	84.158	10.05	12	45	93.1921	73.1821	72.3671	58.1865	10.23	10.23	10.05	10.05	14	13	12	12	48	44	43	35	557	60.1702	8.20654	keratin
XBXL10_1g8289	XBmRNA15669| krt78.2.L	9.52	5	1	11	220	1.49444e+10	1.0308e+10	1.16046e+10	8.2374e+09	1.00647e+10	8.55008e+09	80.6054	9.52	11	43	65.8219	9.38	10	37	60.2119	57.7656	57.1397	47.1153	5.36	5.36	5.21	7.89	9	9	8	9	36	37	35	32	672	66.7786	6.58057	keratin
XBXL10_1g17120	XBmRNA31731| LOC121402261	57.94	10	1	11	110	5.31908e+09	7.87994e+09	2.26389e+09	1.2022e+08	1.10408e+08	2.25522e+08	86.8595	53.17	8	35	83.0531	57.94	11	34	53.8137	5.72304	4.81702	10.8373	41.27	21.43	28.57	28.57	6	3	4	4	23	5	5	8	126	13.9256	10.3159	histone H2B
XBXL10_1g22782	XBmRNA42459| LOC108716546	57.94	6	1	11	90	5.31908e+09	7.87994e+09	2.26389e+09	1.2022e+08	1.10408e+08	2.25522e+08	48.4227	53.17	8	25	54.3364	57.94	11	27	29.0006	8.45076	7.84606	13.3149	41.27	33.33	40.48	40.48	6	4	5	5	17	6	6	9	126	13.8956	10.3159	histone H2B
XBXL10_1g16785	XBmRNA31368| LOC121402047	33.9	25	16	20	206	5.85898e+09	7349848014	2.00709e+09	1.31693e+08	1.11573e+08	1.63031e+08	216.529	29.01	19	65	201.263	33.9	20	62	151.074	28.9826	7.94053	19.5821	29.01	18.21	7.59	16.53	18	10	4	8	47	15	6	11	593	65.6593	10.8872	homology to histone H4 (repeated)
XBXL10_1g19990	XBmRNA36987| h2aj.L	36.51	2	1	4	21	10240411662	6740954978	3.64384e+09	2.11607e+08	244617778	1.29721e+08	11.9043	7.14	1	5	13.8376	25.4	2	5	4.48197	3.94232	4.03679	7.34625	7.14	7.14	18.25	18.25	1	1	2	3	2	2	3	4	126	13.5126	11.0483
XBXL10_1g31067	XBmRNA58735| h2ax.2.L	59.44	5	1	6	46	5.10262e+09	6.56357e+09	1.73071e+09	1.2016e+08	244617778	1.75805e+08	31.4665	16.08	3	14	40.7687	59.44	6	15	21.3796	3.94232	4.03679	4.18692	16.08	11.19	6.29	11.19	3	2	1	2	9	3	2	3	143	15.1904	10.9019
XBXL10_1g10870	XBmRNA20450| krt78.9.S	4.81	6	1	8	162	1.03985e+10	6.47253e+09	7.32509e+09	6.40051e+09	7.27386e+09	6.37081e+09	57.3576	4.81	8	29	48.9935	4.81	8	28	49.4435	43.4834	45.1504	40.9925	3.39	3.39	3.39	3.39	7	7	7	7	27	27	27	24	561	59.2328	8.23584	annotation error
XBXL10_1g10871	XBmRNA20451| krt78.7.S	4.7	6	1	8	165	1.03985e+10	6.47253e+09	7.32509e+09	6.40051e+09	7.27386e+09	6.37081e+09	55.3895	4.7	8	29	45.2423	4.7	8	27	49.4435	43.4834	45.1504	40.9925	4.7	4.7	4.7	4.7	8	8	8	8	28	28	28	25	617	64.3427	8.38232	annotation error
XBXL10_1g1206	XBmRNA1949| h2az1.L	46.09	2	2	4	20	10240411662	4.50154e+09	3.64384e+09	2.11607e+08	244617778	1.52221e+08	11.9043	7.03	1	5	18.3937	40.63	3	6	4.48197	3.94232	4.03679	4.18692	7.03	7.03	7.03	12.5	1	1	1	2	2	2	2	3	128	13.4775	10.5503
XBXL10_1g40084	XBmRNA75391| h3-3b.L	59.56	4	3	12	75	3.01924e+09	3334465288	1.19889e+09	4.77225e+07	38473531	5.29212e+07	40.5047	52.21	9	20	66.401	59.56	11	27	33.2778	1.72062	3.41238	1.72772	29.41	14.71	14.71	9.56	8	3	3	2	15	5	4	4	136	15.3185	11.2681
XBXL10_1g22787	XBmRNA42464| LOC108716540	59.56	7	2	11	73	3.01924e+09	3334465288	1.19889e+09	4.77225e+07	38473531	5.29212e+07	37.2173	28.68	8	19	58.0077	59.56	10	26	33.2778	1.72062	3.41238	1.72772	29.41	14.71	14.71	9.56	8	3	3	2	15	5	4	4	136	15.3785	11.2681	histone H3-like
XBXL10_1g18988	XBmRNA35012| vtga2.L	45.43	1	62	79	404	2.07566e+09	2.34557e+09	2.39735e+08				583.203	44.49	77	181	525.482	44.05	71	164	156.36				25.07				40				59				1807	201.418	9.0415
XBXL10_1g18990	XBmRNA35014| vtgb1.L	43.75	1	55	81	387	2.33424e+09	2.17928e+09	2.21573e+08				545.023	41.39	72	170	533.458	41.88	78	171	116.861				22.23				34				46				1817	202.99	8.93896
XBXL10_1g21498	XBmRNA39801| vtgb1.S	33.78	1	32	56	233	1.99607e+09	2.00014e+09	1.8639e+08				297.674	31	50	101	313.616	33.33	55	110	51.0427				12.22				18				22				1800	200.802	8.90967
XBXL10_1g6410	XBmRNA12051| ubb.L	80.47	9	7	7	125	2268470208	1.91384e+09	1.04796e+09	4.95244e+08	5.57443e+08	3.69376e+08	54.481	72.56	6	34	50.3261	72.56	6	29	30.3477	33.0274	25.2608	23.9167	72.56	80.47	72.56	72.56	6	7	6	6	19	16	13	14	379	42.669	7.57666
XBXL10_1g13683	XBmRNA25971| npm2.L	47.5	1	6	8	86	2.67105e+09	1.77385e+09		657215903	1.892e+08		135.925	46.5	7	35	84.6224	46.5	7	24		61.2022	24.3949			47.5	46.5			8	7			16	11		200	22.0319	4.84326
XBXL10_1g15336	XBmRNA28658| npm2.S	47.45	1	6	8	77	3.31815e+09	1760945407		639590631	1.31666e+08		107.096	47.45	8	29	76.8934	47.45	8	21	2.58374	62.2346	36.6435		6.12	47.45	47.45		1	7	7		1	15	11		196	21.5818	5.021
XBXL10_1g33964	XBmRNA64064| muc5acl.S	13.34	2	33	33	170	7.89682e+08	1405627248	3.88025e+08				166.903	11.93	29	58	181.405	12.7	31	65	122.322	2.12106			9.88	0.4			25	1			46	1			2976	327.709	4.75439
XBXL10_1g13517	XBmRNA25690| pcna.L	77.39	1	1	20	105	3503223286	1.29158e+09					235.62	77.39	19	68	108.425	63.22	16	37																	261	28.7903	4.65283
XBXL10_1g15458	XBmRNA28883| pcna.S	77.39	1	1	20	105	3503223286	1.29158e+09					235.321	77.39	19	68	108.425	63.22	16	37																	261	28.8063	4.65283
XBXL10_1g39729	XBmRNA74733| p4hb.L	64.51	1	20	32	73	1.65123e+09	1.10806e+09					151.533	62.94	31	50	47.2434	37.45	21	23																	510	57.1919	4.83057
XBXL10_1g40746	XBmRNA76733| LOC108701392	0.25	1	1	1	13	1207527532	1090730751	668722429	527872024	654779966	3.95944e+08	0	0.25	1	2	0	0.25	1	2	0	0	0	0	0.25	0.25	0.25	0.25	1	1	1	1	2	3	2	2	2361	267.21	4.97021	annotation error
XBXL10_1g18989	XBmRNA35013| LOC108714181	42.51	1	55	72	276	1.08755e+09	1.07174e+09	9.53627e+07				317.52	38.16	63	128	324.353	38.71	62	123	50.295				11.23				20				25				1816	202.22	9.1001
XBXL10_1g42783	XBmRNA80431| p4hb.S	46.93	1	8	20	38	1.59545e+09	1.0566e+09					87.3692	45.35	19	30	18.2478	14.26	8	8																	505	56.5755	4.81787
XBXL10_1g7899	XBmRNA14908| mycbp2.L	0.15	1	1	1	2	3769027508	8.72362e+08					0	0.15	1	1	0	0.15	1	1																	4732	519.787	7.10791	annotation error
XBXL10_1g12995	XBmRNA24600| pkm.L	52.03	2	9	25	91	1.61048e+09	7.69355e+08	5.67283e+07	26418416	2.85562e+07	19983727	151.077	52.03	25	52	97.9749	33.39	19	34	1.76551	1.91881	0	1.85752	1.86	1.86	3.39	1.86	1	1	2	1	1	1	2	1	590	64.1917	6.44287
XBXL10_1g15926	XBmRNA29748| pkm.S	47.44	2	2	19	69	1.47243e+09	7.31711e+08	4.63047e+07	2.02094e+07	2.87966e+07	1.69624e+07	96.6359	47.44	19	38	46.5001	25.81	13	22	4.19874	4.28617	3.43354	4.50474	4.55	4.55	6.26	4.55	2	2	3	2	2	2	3	2	527	57.4034	6.49365
XBXL10_1g11167	XBmRNA20983| LOC108710038	0.36	2	1	1	13	1470936128	7.16337e+08	573170308	605357361	629952838		1.63555	0.36	1	3	1.70601	0.36	1	2	3.48555	5.17194	5.32385		0.36	0.36	0.36		1	1	1		2	3	3		2252	248.496	6.18896	annotation error
XBXL10_1g22227	XBmRNA41314| h1-8.S	30.04	1	6	9	84	1.05011e+09	7.12621e+08	1.93332e+08	3.5825e+08	5.67469e+07	6.87937e+07	64.5612	30.04	9	21	68.1196	30.04	9	22	31.8108	40.1221	24.1761	28.4419	25.48	25.48	25.1	24.71	7	7	6	5	10	13	9	9	263	28.1799	10.1548
XBXL10_1g18217	XBmRNA33562| acta4.L	36.6	8	2	14	126	1.35716e+09	6.48251e+08	3.00464e+08	1.8285e+08	193144644	2.0973e+08	76.7361	36.6	14	30	48.6375	28.65	11	22	39.9329	35.7873	31.8089	35.4556	31.83	28.65	28.65	27.06	12	11	11	10	20	19	18	17	377	41.9569	5.38916
XBXL10_1g15098	XBmRNA28155| ldhb.S	46.71	1	17	18	63	1.3036e+09	5.81994e+08	1.30358e+08				74.678	46.71	17	32	49.7017	41.62	16	24	16.9641				17.07				5				7				334	36.3942	6.93213
XBXL10_1g11867	XBmRNA22159| ovch1.L	34.58	1	35	35	122	607132885	516673467	4.17129e+07				177.23	32.94	34	60	165.292	30.18	33	54	15.4197				5.97				7				8				1524	167.373	5.30029
XBXL10_1g19943	XBmRNA36893| h1-8.L	16.4	1	1	4	36	6.88434e+08	4.94403e+08	144552858	2.29108e+08	3.92639e+07	7.21279e+07	27.6603	16.4	4	9	30.2539	16.4	4	10	13.5637	13.5077	13.3024	12.6622	10.4	10.4	10.4	10	3	3	3	2	4	4	5	4	250	26.5689	10.1841
XBXL10_1g38552	XBmRNA72785| LOC108705648	4.79	2	1	2	8	194310650	4.90359e+08	1.40693e+08				1.62816	2.4	1	2	4.19954	4.79	2	3	1.71279				4.79				2				3				334	37.1199	5.98584	annotation error
XBXL10_1g9336	XBmRNA17448| prdx4.S	60.45	2	10	11	44	4.5687e+08	4.4731e+08	6.46098e+07	3.60689e+07	4.42744e+07	3.10415e+07	52.1831	51.87	10	16	61.1323	56.34	10	18	0	0	1.60754	0	5.6	5.6	5.6	5.6	2	2	2	2	3	2	3	2	268	29.9502	6.53662
XBXL10_1g31212	XBmRNA59042| eno1.L	63.13	1	2	22	88	1.181e+09	412767197	7.05027e+07	2.69591e+07	48778882	2.09906e+07	162.126	63.13	22	48	88.575	49.31	15	28	22.9095	1.66602	1.74177	1.72852	20.05	3.23	1.38	1.38	7	2	1	1	8	2	1	1	434	47.3422	6.12549
XBXL10_1g33404	XBmRNA63027| eno1.S	60.14	1	2	22	84	1.181e+09	412767197	7.05027e+07	2.69591e+07	48778882	2.09906e+07	152.441	59.68	21	44	88.575	47.7	15	28	22.9095	1.66602	1.74177	1.72852	20.05	3.23	1.38	1.38	7	2	1	1	8	2	1	1	434	47.4743	6.23975
XBXL10_1g7446	XBmRNA14034| mdh2.L	70.12	2	4	19	75	1.02662e+09	357746422	4.85808e+07				141.903	70.12	19	44	71.3902	67.16	18	24	13.2717				21.6				7				7				338	35.766	8.5874
XBXL10_1g10235	XBmRNA19144| mdh2.S	70.12	2	4	19	72	1.02662e+09	357746422	4.85808e+07				140.89	70.12	19	44	65.511	67.16	18	22	10.9527				17.75				6				6				338	35.713	8.76318
XBXL10_1g30322	XBmRNA57116| ide.L	0.99	2	1	1	4	3.33625e+08	356891370	264014527		2.5667e+08		0	0.99	1	1	0	0.99	1	1	0		0		0.99		0.99		1		1		1		1		1011	116.471	6.18896	annotation error
XBXL10_1g24013	XBmRNA44934| serpini2.L	1.72	1	1	1	12	441843740	356298840	2.93108e+08	2.22735e+08	3.00436e+08	1.71823e+08	3.71312	1.72	1	2	4.1285	1.72	1	2	3.78102	1.82848	3.62481	3.57678	1.72	1.72	1.72	1.72	1	1	1	1	2	2	2	2	408	45.7497	6.45557	annotation error
XBXL10_1g33108	XBmRNA62519| hspa1l.S	47.08	7	2	29	96	1.09248e+09	3.51461e+08	9.44853e+07	51691565	5.96354e+07	3.57048e+07	144.153	45.54	27	48	47.5158	25.38	15	22	14.2902	6.87659	9.62518	9.79658	10.77	7.69	9.85	9.23	6	5	6	4	9	6	7	4	650	71.1444	5.59229
XBXL10_1g30921	XBmRNA58397| hspa8.L	45.82	7	1	28	95	1.09248e+09	3.51461e+08	9.44853e+07	51691565	5.96354e+07	3.57048e+07	136.532	44.27	26	46	50.6576	27.71	16	23	14.2902	6.87659	9.62518	9.79658	10.84	7.74	9.91	9.29	6	5	6	4	9	6	7	4	646	70.7481	5.40186
XBXL10_1g36041	XBmRNA68166| lgals3.L	39.08	2	10	10	30	1.25684e+09	3.49479e+08					65.1119	39.08	10	22	26.6137	21.07	5	8																	261	28.3141	6.78564
XBXL10_1g37796	XBmRNA71452| hspa5.S	49.77	1	4	33	134	1.1972e+09	3.39847e+08	7.36431e+07	3.1956e+07	4.55327e+07	2.27429e+07	260.866	49.62	32	79	116.649	41.37	25	41	8.90176	7.21221	5.99769	6.10431	9.01	6.56	6.56	5.04	5	3	3	2	6	3	3	2	655	72.3745	5.13525
XBXL10_1g34635	XBmRNA65454| hspa5.L	49.39	1	2	32	126	1.1972e+09	3.39847e+08	7.36431e+07	3.1956e+07	4.55327e+07	2.27429e+07	257.318	49.24	31	75	108.602	35.87	22	37	8.90176	7.21221	5.99769	6.10431	8.97	6.53	6.53	5.02	5	3	3	2	6	3	3	2	658	72.6425	5.07178
XBXL10_1g5037	XBmRNA9392| supt16h.S	29.69	1	7	31	77	4.47984e+08	3.14201e+08					104.631	27.85	29	44	74.7753	21.47	22	33																	1034	118.125	5.5415
XBXL10_1g13276	XBmRNA25175| pdia3.L	66.2	1	19	33	99	1.41455e+09	3.12035e+08					186.856	66.2	33	67	88.3964	45.4	21	32																	500	55.7541	5.77002
XBXL10_1g15659	XBmRNA29254| pdia3.S	63.15	1	23	37	109	1.41455e+09	3.12035e+08					218.571	63.15	37	74	101.552	47.21	21	35																	502	56.0864	5.99854
XBXL10_1g30094	XBmRNA56645| ovos2.L	13.05	1	16	16	36	1.83886e+07	3.10383e+08	1.40468e+08				4.93997	1.53	2	2	52.3654	11.52	15	19	43.1056				10.13				12				15				1441	159.26	5.07178
XBXL10_1g14242	XBmRNA26868| prdx2.L	48.51	1	6	8	44	5.26692e+08	3.09303e+08	7.54118e+07	4.4935e+07	5.37656e+07	34742243	84.8966	38.12	7	21	63.0796	38.12	7	14	1.62036	0	3.30036	0	7.43	7.43	7.43	3.47	2	2	2	1	3	2	3	1	202	22.4126	7.00537
XBXL10_1g37055	XBmRNA69898| pklr.L	7.89	3	2	5	15	5.81786e+08	3.07751e+08	5.67283e+07	26418416	33515530	19983727	15.4703	6.42	4	6	8.53091	4.95	4	5	1.76551	1.91881	0	1.85752	2.02	2.02	2.02	2.02	1	1	1	1	1	1	1	1	545	60.0899	7.2251
XBXL10_1g2396	XBmRNA4198| supt16h.L	23.46	1	2	26	61	4.47984e+08	3.04435e+08					76.8514	21.62	24	35	59.478	16.51	17	26																	1036	118.616	5.84619
XBXL10_1g43806	XBmRNA82455| thumpd1.S	2.12	3	1	1	9	266447744	299912248	336484904	105163532	241989568	191660412	0	2.12	1	1	0	2.12	1	1	0	1.6136	0	0	2.12	2.12	2.12	2.12	1	1	1	1	2	2	1	2	283	32.4434	8.1626	annotation error
XBXL10_1g33049	XBmRNA62381| ssrp1.S	40.12	1	30	30	85	4.23238e+08	2.96109e+08					142.244	40.12	30	49	93.2483	34.2	26	36																	693	78.6191	6.27783
sfGFP	sfGFP	64.29	2	11	11	73	4.34979e+08	2.84548e+08	8.15551e+07	3.41566e+08	6.02707e+07	4.58801e+07	67.7799	46.22	10	20	45.4192	41.6	8	15	20.6979	57.4072	21.0448	16.4052	32.35	64.29	32.35	29.41	5	11	5	5	6	20	6	6	238	26.7644	6.37939
XBXL10_1g27608	XBmRNA51815| dsp.L	3.59	3	3	12	90	3.54875e+08	2.7845e+08	3.15772e+08	207448109	2.60474e+08	1.93993e+08	26.8116	3.28	10	14	18.7463	2.9	10	13	36.1572	22.6169	28.6461	20.6872	3.31	3.28	3.21	2.83	11	10	10	8	18	17	17	11	2866	330.221	6.91748	annotation error
XBXL10_1g19138	XBmRNA35386| prdx1.L	31.66	2	3	5	23	4.26092e+08	2.72777e+08	80475330	49557623	6.85342e+07	4.74152e+07	19.3827	31.66	5	8	6.6448	14.07	3	3	4.43196	4.62623	4.05808	1.84007	8.54	8.54	8.54	8.54	2	2	2	2	4	3	3	2	199	22.2853	6.771
XBXL10_1g32459	XBmRNA61267| gapdh.S	36.64	1	5	10	26	3.84677e+08	2.48921e+08	1.13238e+08	8.71405e+07	1.39195e+08	3.16628e+07	25.7314	36.64	10	12	6.00791	17.42	5	6	4.80058	0	0	0	9.01	4.5	4.5	2.1	3	2	2	1	3	2	2	1	333	35.8122	8.04541
XBXL10_1g30178	XBmRNA56795| gapdh.L	32.13	1	4	9	30	3.65378e+08	2.48921e+08	1.13238e+08	8.71405e+07	1.39195e+08	3.16628e+07	39.3684	32.13	9	15	5.26001	19.82	6	7	4.80058	0	0	0	9.01	4.5	4.5	2.1	3	2	2	1	3	2	2	1	333	35.8793	8.25049
XBXL10_1g12445	XBmRNA23279| hsp90b1.L	38.14	1	16	30	79	7.80304e+08	236499893				10868783	148.724	38.14	30	54	54.0252	24.84	18	24				1.97373				1.49				1				1	805	92.6505	4.81787
XBXL10_1g16360	XBmRNA30722| hsp90b1.S	33.04	1	11	25	65	7.80304e+08	236499893				10868783	108.89	33.04	25	42	49.735	21.37	16	22				1.97373				1.49				1				1	805	92.9266	4.81787
XBXL10_1g21916	XBmRNA40702| snu13.S	39.06	1	1	4	15	395998241	2.33891e+08					21.2809	39.06	4	8	18.5563	39.06	4	7																	128	14.0596	8.27979
XBXL10_1g24800	XBmRNA46291| mdh1.S	21.02	1	3	7	15	3.38797e+08	2.14827e+08					25.4686	21.02	7	11	7.81729	12.5	3	3	0				2.56				1				1				352	38.401	7.00537
XBXL10_1g21455	XBmRNA39714| got2.S	52.93	1	10	17	34	5.14768e+08	2.14255e+08	3.54535e+07				67.3113	52.69	16	24	18.7315	20.14	7	8	5.25138				6.09				2				2				427	47.6705	9.14404
XBXL10_1g34737	XBmRNA65670| dkc1.L	25.83	1	12	12	37	2.22882e+08	1.91611e+08					64.0893	25.83	12	20	54.0846	24.54	11	17																	542	60.6602	9.39307
XBXL10_1g35655	XBmRNA67322| actn4.L	11.73	3	4	9	11	7.6653e+07	182839988				1.04385e+07	24.7368	11.73	9	9	2.24203	1.52	1	1				0				1.19				1				1	921	105.861	5.2876
XBXL10_1g41019	XBmRNA77381| hbg2.L	6.8	1	1	1	5	83118000	175892392	2.13146e+07		1.42346e+07		2.30717	6.8	1	1	3.77793	6.8	1	2	1.78109		1.78859		6.8		6.8		1		1		1		1		147	15.9624	9.23193
XBXL10_1g18930	XBmRNA34882| got2.L	43.56	1	6	13	31	4.81853e+08	1.74231e+08	4.669e+07				66.9596	43.56	13	22	13.1514	14.99	5	7	4.58159				6.09				2				2				427	47.5543	8.83643
XBXL10_1g44362	XBmRNA83374| aldoa.S	34.62	2	3	14	36	3.15431e+08	1.74181e+08	4.76014e+07	2.42679e+07	28137952		44.5951	34.62	13	16	27.3042	23.9	9	12	4.53653	0	4.44162	1.70835	7.97	1.92	7.97	3.85	3	1	3	1	3	1	3	1	364	39.3614	8.29443
XBXL10_1g42049	XBmRNA79058| aldoa.L	34.07	2	1	12	32	3.15431e+08	1.74181e+08	4.76014e+07	2.42679e+07	28137952		41.6307	34.07	11	14	27.3042	21.43	7	10	4.53653	0	4.44162	1.70835	7.97	1.92	7.97	3.85	3	1	3	1	3	1	3	1	364	39.3814	8.29443
XBXL10_1g38939	XBmRNA73492| krt15.2.L	2.04	1	1	1	4		167055428			116362850						1.89956	2.04	1	1			3.81375	0			2.04	2.04			1	1			2	1	441	47.7141	5.19873	annotation error
XBXL10_1g3410	XBmRNA6228| vcp.L	29.44	3	21	21	44	6.98673e+07	1.59057e+08	1.90354e+07				35.2973	14.04	8	12	78.6968	27.95	20	29	4.35025				3.48				3				3				805	89.2286	5.30029
XBXL10_1g22887	XBmRNA42640| mdh1.L	25.85	1	4	8	17	3.80431e+08	1.58986e+08					21.8762	25.85	8	12	12.202	17.33	4	4	0				2.56				1				1				352	38.3549	6.69775
XBXL10_1g40827	XBmRNA76940| acadl.L	20.95	1	7	7	18	2.45233e+08	1.58008e+08					33.4205	20.95	7	11	22.0599	19.37	6	7																	444	49.2429	7.95752
XBXL10_1g19545	XBmRNA36168| snu13.L	39.06	1	1	4	15	2.77331e+08	1.49156e+08					20.5221	39.06	4	8	17.8409	39.06	4	7																	128	14.0455	8.27979
XBXL10_1g42972	XBmRNA80768| ahcy.S	29.56	6	13	13	27	2.68349e+08	1.45477e+08	36405367				40.0506	23.56	10	14	26.9235	27.71	11	12	3.79608				3				1				1				433	47.7143	6.40479
XBXL10_1g30123	XBmRNA56694| tpi1.L	53.63	1	5	13	37	461983680	1.44115e+08	3.55604e+07	13440320	1.25515e+07		53.4029	53.63	13	21	15.2452	25.4	7	9	4.37977	2.48735	2.7538		14.92	6.05	8.87		4	1	2		4	1	2		248	26.8629	7.00537
XBXL10_1g32442	XBmRNA61199| tpi1.S	39.92	1	4	10	29	461983680	1.44115e+08	3.55604e+07	13440320	1.25515e+07		38.8127	39.92	10	15	14.1691	22.58	6	8	2.68674	2.48735	2.7538		12.1	6.05	8.87		3	1	2		3	1	2		248	26.7448	7.35693
XBXL10_1g23068	XBmRNA42996| LOC108716665	9.38	1	1	2	3	2.56213e+08	1.43325e+08					3.55916	9.38	2	2	0	3.13	1	1																	224	25.1037	8.30908
XBXL10_1g32116	XBmRNA60512| fbl.L	30.61	2	8	8	21	1.86721e+08	1.42112e+08					29.7256	26.06	7	11	24.1577	30.61	8	10																	330	34.741	10.2427
XBXL10_1g14127	XBmRNA26658| dnmt1.L	28.76	1	16	38	79	2.88026e+08	1.41111e+08					140.433	27.42	36	55	62.2447	16.6	21	24																	1488	167.623	6.49365
XBXL10_1g1286	XBmRNA2109| LOC121403141	18.65	1	9	9	20	1.50108e+08	1.39183e+08					12.8414	16.08	8	9	19.1309	18.65	9	11																	429	49.1909	7.86963
XBXL10_1g4476	XBmRNA8316| lsm4.S	5.11	1	1	1	6	223304300	1.38184e+08	1.0396e+08	4.28722e+07	7.93457e+07	2.80825e+07	2.31827	5.11	1	1	2.03968	5.11	1	1	1.93242	2.23329	2.26781	1.78565	5.11	5.11	5.11	5.11	1	1	1	1	1	1	1	1	137	15.0936	9.99365
XBXL10_1g27	XBmRNA41| nop56.L	39.1	1	17	17	35	2.44105e+08	1.35994e+08					69.8216	37.41	16	22	29.6123	21.99	11	13																	532	59.7046	9.12939
XBXL10_1g17021	XBmRNA31618| dnmt1.S	23.73	1	10	32	64	2.69788e+08	1.35509e+08					108.934	22.39	30	45	47.6294	12.06	16	19																	1492	167.906	6.59521
XBXL10_1g12977	XBmRNA24561| tbc1d2b.L	0.72	1	1	1	1		1.35047e+08									0	0.72	1	1																	969	112.464	6.15088	annotation error
XBXL10_1g18233	XBmRNA33605| eef1g.L	19.95	1	5	7	12	2.73344e+08	1.34842e+08					21.2214	16.51	6	8	11.7214	12.84	4	4																	436	49.8312	7.38623
XBXL10_1g18831	XBmRNA34720| gpi.L	40.69	2	9	16	34	3.48212e+08	1.34234e+08					74.7947	40.69	16	25	20.1743	20.25	9	9																	553	61.9185	7.34229
XBXL10_1g10192	XBmRNA19060| eef1a1o.S	13.02	4	2	5	21	357163042	1.33188e+08	65393232	4.96939e+07	5.33473e+07	4.12846e+07	21.7597	13.02	5	7	9.02253	7.81	4	5	4.25231	4.59111	6.60418	4.06867	4.56	4.56	6.51	4.56	2	2	3	2	2	2	3	2	461	50.1923	9.15869
XBXL10_1g25607	XBmRNA47820| eef1a1.S	12.55	4	3	6	21	353558868	1.33188e+08	5.12493e+07	4.96939e+07	5.33473e+07	3.3646e+07	9.81318	6.49	3	4	9.02253	6.49	3	4	4.25231	4.59111	6.60418	8.80244	8.01	4.55	9.96	9.74	3	2	4	4	3	2	4	4	462	50.1822	9.01221
XBXL10_1g43545	XBmRNA81934| LOC108702272	0.02	2	1	1	1		132841704									1.75436	0.02	1	1																	26576	2950.1	6.3667	annotation error
XBXL10_1g14920	XBmRNA27738| ybx2.L	50.68	5	7	15	27	3.76399e+08	1.30713e+08					66.5886	50.68	15	21	21.1272	23.16	6	6																	367	40.6304	9.31982
XBXL10_1g17564	XBmRNA32348| ybx2.S	43.83	1	7	15	21	3.52475e+08	1.30595e+08					48.1334	43.52	14	16	12.8835	15.43	5	5																	324	36.154	9.29053
XBXL10_1g1287	XBmRNA2110| LOC108711114	17.36	1	6	6	11	156672859	1.30292e+08					10.3712	10.76	5	5	12.3651	17.36	6	6																	409	47.1123	7.76709
XBXL10_1g41890	XBmRNA78850| nme2.L	40.26	3	4	7	19	3.36128e+08	1.28684e+08	4.66528e+07		18271936		30.7026	40.26	7	11	14.1212	34.42	5	6	2.77311		2.16592		7.79		7.79		1		1		1		1		154	17.4778	6.56592
XBXL10_1g12071	XBmRNA22521| hspa9.L	17.16	1	1	10	16	1.24287e+08	1.28201e+08	5.59547e+07	5.75378e+06	4.06511e+07		24.1908	17.16	10	11	0	1.04	1	2	1.7283	0	1.66287		1.04	1.04	1.04		1	1	1		1	1	1		670	72.5152	5.92236
XBXL10_1g15213	XBmRNA28367| hspa9.S	15.67	1	1	10	16	1.24287e+08	1.28201e+08	5.59547e+07	5.75378e+06	4.06511e+07		21.1453	15.67	10	11	0	1.04	1	2	1.7283	0	1.66287		1.04	1.04	1.04		1	1	1		1	1	1		670	72.7943	5.84619
XBXL10_1g40988	XBmRNA77319| hspd1.L	20.49	2	12	12	21	4.17493e+07	1.28066e+08	2.7098e+07				13.0486	8.68	4	4	43.5976	20.49	12	16	4.28038				4.34				1				1				576	61.5427	6.30322
XBXL10_1g39439	XBmRNA74335| XB5762393.L	2.24	4	1	1	2		1.26274e+08		117117948							1.61186	2.24	1	1		0				2.24				1				1			312	34.9647	5.77002	annotation error
XBXL10_1g40907	XBmRNA77181| eef1b2.L	63	1	8	11	30	303841539	1.25783e+08					60.0419	63	11	21	31.9451	36.12	6	9																	227	25.1316	4.7417
XBXL10_1g24836	XBmRNA46352| hsp90ab1.S	24.73	3	3	17	29	5.37404e+08	1.24438e+08				9.08155e+06	56.7591	24.73	17	21	12.8875	8.65	5	6				1.97373				2.88				2				2	728	83.6754	5.07178
XBXL10_1g22805	XBmRNA42481| LOC108716102	22.21	3	1	15	27	4.14803e+08	1.24438e+08				9.08155e+06	54.3369	22.21	15	19	12.8875	8.69	5	6				1.97373				2.9				2				2	725	83.4132	5.03369
XBXL10_1g15404	XBmRNA28780| ppia.S	29.88	4	4	4	7	1.93671e+08	122060925					14.0197	29.88	4	6	2.55112	5.49	1	1																	164	17.9008	8.35303
XBXL10_1g19023	XBmRNA35097| acadm.L	35.46	2	11	11	32	1.78382e+08	1.21919e+08					74.2577	35.46	11	20	43.5021	35.46	11	12																	423	46.2406	8.57275
XBXL10_1g7382	XBmRNA13914| fuca1.L	7.99	2	4	4	12	1.66058e+08	1.21207e+08					10.5538	7.99	4	6	9.69084	7.99	4	6																	463	53.1143	6.32861
XBXL10_1g38207	XBmRNA72178| ckm.S	7.61	2	2	3	9	97105955	1.16536e+08			61545041		8.62968	7.61	3	5	6.28334	7.61	3	3			2.30093				2.62				1				1		381	43.0366	7.06396
XBXL10_1g13529	XBmRNA25718| astl.L	6.18	1	6	6	14	1.67481e+08	1.14358e+08	46724228				14.3122	5.46	5	7	11.2369	3.76	4	6	2.4278				0.72				1				1				1117	124.176	8.95361
XBXL10_1g3335	XBmRNA6078| acaa2.L	37.53	1	6	12	22	1.82409e+08	1.13821e+08					33.5291	31.23	10	14	19.3434	25.94	7	8																	397	41.8797	7.75244
XBXL10_1g6511	XBmRNA12203| aldoc.L	22.53	2	5	6	20	2.4667e+08	1.12196e+08	4.18226e+07	2.42679e+07	24484191		43.8763	22.53	6	13	8.34468	7.14	3	4	1.68402	0	1.77099		1.92	1.92	1.92		1	1	1		1	1	1		364	39.2479	6.53662
XBXL10_1g44267	XBmRNA83202| nme2.S	20.13	1	1	4	13	2.52634e+08	1.07577e+08	4.66528e+07		18271936		21.5768	20.13	4	8	8.67864	14.29	2	3	2.77311		2.16592		7.79		7.79		1		1		1		1		154	17.4909	6.56592
XBXL10_1g5599	XBmRNA10492| LOC108705351	21.96	2	11	11	23	1.9435e+08	105022428					35.4063	15.97	8	12	26.545	18.51	9	11																	551	62.7943	6.66846
XBXL10_1g21389	XBmRNA39587| gpi.S	31.28	1	6	13	28	3.00274e+08	102710744					47.8762	28.75	12	20	12.495	14.29	7	7	2.50179				2.53				1				1				553	62.1037	7.50342
XBXL10_1g17924	XBmRNA33118| tnni2.L	13.19	2	4	4	6		1.02672e+08									10.717	13.19	4	6																	182	21.0249	8.79248
XBXL10_1g13065	XBmRNA24766| LOC108711332	3.05	1	5	5	11	7.99449e+07	1.01855e+08	20658095				7.4553	2.39	4	4	10.0073	3.05	5	6	0				0.48				1				1				1672	181.999	6.56592	annotation error
XBXL10_1g40475	XBmRNA76145| krt18.3.L	2.38	2	1	1	9	184244239	101369349	68716336	7.38562e+07	113337199	63491897	2.08398	2.38	1	1	1.92074	2.38	1	1	0	0	3.48668	2.00213	2.38	2.38	2.38	2.38	1	1	1	1	1	2	2	2	378	42.9578	5.19873	annotation error
XBXL10_1g15220	XBmRNA28380| zp4.S	3.68	1	1	2	3		1.00322e+08	64648625								5.94299	3.68	2	2	3.32497				2.02				1				1				544	59.5965	6.75635	annotation error
XBXL10_1g36521	XBmRNA68941| MGC82682	5.22	1	1	1	5	1.40944e+08	9.90843e+07					8.68395	5.22	1	3	5.94944	5.22	1	2																	230	26.3953	7.48877
XBXL10_1g29309	XBmRNA55087| txndc5.S	43.81	1	8	14	32	1.5828e+08	9.85145e+07					53.0162	43.81	14	21	21.6174	27.72	9	11																	404	45.9047	5.94775
XBXL10_1g27616	XBmRNA51827| txndc5.L	38.96	1	7	13	28	1.65072e+08	9.85145e+07					54.6248	38.96	13	21	11.664	15.63	5	7																	403	45.8636	6.17627
XBXL10_1g37250	XBmRNA70294| ckb.S	35.17	6	5	11	29	2.96126e+08	9.58717e+07	3.09745e+07				60.4146	35.17	11	21	12.3318	11.02	4	6	3.93423				6.04				2				2				381	42.5196	6.354
XBXL10_1g35937	XBmRNA67934| ckb.L	23.36	3	2	8	22	3.00145e+08	9.58717e+07	3.09745e+07				33.826	23.36	8	14	12.3318	11.02	4	6	3.93423				6.04				2				2				381	42.5424	6.30322
XBXL10_1g14663	XBmRNA27434| XB5888885.L	6.28	2	3	3	4		9.50705e+07	3.6123e+07								7.00771	6.28	3	3	2.32337				2.16				1				1				462	50.5518	8.27979
XBXL10_1g25203	XBmRNA47048| sod2.S	9.38	1	1	2	5	3.38142e+08	9.42651e+07					6.39229	9.38	2	3	2.83355	9.38	2	2																	224	25.0786	8.07471
XBXL10_1g43664	XBmRNA82218| nop58.S	35.08	1	3	14	34	152617406	93923777					73.4958	35.08	14	22	36.4837	24.02	10	12																	533	59.8126	7.26904
XBXL10_1g40888	XBmRNA77144| nop58.L	30.15	1	1	12	29	152617406	93923777					68.6842	30.15	12	20	28.7073	16.29	7	9																	534	59.8247	7.53271
XBXL10_1g3657	XBmRNA6677| LOC108706522	3.17	1	1	1	13	1.58278e+08	92969370	84805405	2.78843e+07	4.35755e+07	1.75954e+07	3.73017	3.17	1	3	1.655	3.17	1	2	0	0	0	0	3.17	3.17	3.17	3.17	1	1	1	1	2	2	3	1	378	43.8867	5.05908	annotation error
XBXL10_1g43453	XBmRNA81731| baz2b.S	0.27	2	1	1	1		9.22054e+07									0	0.27	1	1																	2197	244.031	7.07861	annotation error
XBXL10_1g10680	XBmRNA20062| tuba1c.S	33.18	5	2	13	32	1.21091e+08	9.16662e+07	54394091	4.0861e+07	2.34634e+07	32104629	26.0093	25.84	9	10	3.11651	4.9	2	2	2.94271	23.4041	5.54849	9.12811	5.57	23.61	8.02	10.69	2	9	3	4	2	11	3	4	449	49.8475	5.09717
XBXL10_1g12987	XBmRNA24580| tpm1.L	17.61	9	1	9	21	1.24341e+08	89628652		7.02579e+06	1.69838e+07		20.8709	17.61	8	11	9.27242	7.39	3	4	6.5219	2.9408	4.91634		5.28	7.04	5.28		2	2	2		2	2	2		284	32.6147	4.7417
XBXL10_1g19585	XBmRNA36247| myh9.L	2.14	8	1	3	15	8.61462e+07	8.94758e+07	6.35903e+07	6.29088e+07	4.89573e+07	1.83834e+07	11.8826	2.14	3	4	5.24101	1.27	2	3	2.8741	4.31106	6.11745	2.74696	1.27	1.27	1.27	0.56	2	2	2	1	2	3	2	1	1964	226.67	5.5415	annotation error
XBXL10_1g13049	XBmRNA24727| ppib.L	49.54	4	7	13	31	5.8325e+08	8.69577e+07					45.0228	49.54	13	22	17.2065	25.46	7	9																	216	23.8446	9.29053
XBXL10_1g15883	XBmRNA29644| ppib.S	37.96	4	5	11	18	5.8325e+08	8.69577e+07					28.6592	37.96	11	15	5.20138	12.96	3	3																	216	23.8156	9.29053
XBXL10_1g29248	XBmRNA54965| cdh9.S	0.76	2	1	1	1		86857414									0	0.76	1	1																	790	88.8195	4.99561	annotation error
XBXL10_1g3284	XBmRNA5952| sub1.L	18.18	2	2	2	3	1.19576e+08	8.60749e+07					4.69897	18.18	2	2	2.73663	9.85	1	1																	132	14.7705	9.49561
XBXL10_1g11113	XBmRNA20886| ctsc.S	27.29	1	5	8	13	1.6656e+08	85447809					23.2189	25.33	7	7	23.0194	18.12	5	6																	458	51.5742	6.7124
XBXL10_1g13048	XBmRNA24726| pclaf.L	52.34	1	4	5	13	2.46942e+08	8.38628e+07					27.7058	52.34	5	9	11.2762	36.72	3	4																	128	13.2395	9.0415
XBXL10_1g9867	XBmRNA18437| tuba5.S	24	1	0	9	22	1.21461e+08	8.31996e+07		3.10635e+07	2.34634e+07	2.89923e+07	18.7164	20.44	7	7	2.3411	3.78	2	2	0	11.2958	5.54849	6.9757	1.56	12.22	8	8.67	1	5	3	3	1	6	3	3	450	50.0545	5.05908
XBXL10_1g6992	XBmRNA13089| tuba5.L	20.49	1	0	8	21	1.21461e+08	8.31996e+07		3.10635e+07	2.34634e+07	2.89923e+07	13.9708	16.93	6	6	2.3411	3.79	2	2	0	11.2958	5.54849	6.9757	1.56	12.25	8.02	8.69	1	5	3	3	1	6	3	3	449	49.9475	5.14795
XBXL10_1g12864	XBmRNA24308| tubal3.1.L	30.67	1	2	12	17	1.24941e+08	8.31996e+07		1.87093e+07	21818782		24.2467	26.89	10	10	2.3411	3.78	2	2	0	2.35625	2.64886		1.56	5.33	2		1	3	1		1	3	1		450	50.0354	5.14795
XBXL10_1g16027	XBmRNA29970| tubal3.1.S	27.33	1	0	11	19	1.24941e+08	8.31996e+07	54394091	3.30617e+07	21818782		22.0174	23.56	9	9	2.3411	3.78	2	2	2.94271	8.07619	2.64886		5.56	9.33	2		2	4	1		2	5	1		450	50.1675	5.14795
XBXL10_1g28942	XBmRNA54446| igf2bp3.S	26.64	1	1	13	25	1.55031e+08	8.16722e+07					41.6304	26.64	13	17	21.3699	13.66	7	8																	593	65.3451	8.99756
XBXL10_1g27048	XBmRNA50670| igf2bp3.L	24.92	1	1	13	26	1.55031e+08	8.16722e+07					40.3778	24.92	13	17	23.5616	15.32	8	9																	594	65.6023	8.92432
XBXL10_1g711	XBmRNA925| lap3.L	19.81	1	7	7	15	5.22235e+07	8.16309e+07	1.55082e+07				18.3894	16.54	5	6	16.6411	14.23	6	6	6.90711				6.54				3				3				520	56.1876	7.73779
XBXL10_1g2434	XBmRNA4252| LOC108715140	21.88	2	2	2	6	61246482	81176432					9.37426	21.88	2	3	9.72346	21.88	2	3																	64	7.48789	9.99365
XBXL10_1g25706	XBmRNA48037| ncl.S	27.52	1	5	14	26	2.03649e+08	8.02987e+07					56.3389	27.52	14	21	13.5677	8.94	5	5																	705	75.49	4.88135
XBXL10_1g23829	XBmRNA44521| ncl.L	24.42	1	3	12	23	2.03649e+08	8.02987e+07					54.0663	24.42	12	19	11.9577	8.14	4	4																	651	70.1675	4.93213
XBXL10_1g19682	XBmRNA36408| aco2.L	35.42	1	7	22	34	2.75072e+08	7.99548e+07					85.2475	35.42	22	30	12.0876	6.65	4	4																	782	85.3856	7.10791
XBXL10_1g34688	XBmRNA65567| tktl2.L	30.88	1	14	16	30	1.71005e+08	7.52427e+07					48.6866	28.8	15	21	20.4374	14.88	7	9																	625	67.4088	6.72705
XBXL10_1g40515	XBmRNA76227| tuba4b.L	20.09	2	1	9	25	1.19674e+08	7.4222e+07	4.45055e+07	3.85514e+07	3.16061e+07	4.10382e+07	13.8524	14.73	6	8	8.23519	10.27	4	4	3.65132	9.88498	6.12078	5.59491	4.69	13.39	6.7	4.69	2	6	3	2	2	6	3	2	448	49.8553	5.05908
XBXL10_1g2768	XBmRNA4881| ran.L	30.09	2	7	7	11	3.71899e+08	7.38561e+07					17.9504	27.31	6	9	2.7587	7.87	2	2																	216	24.3826	7.88428
XBXL10_1g22041	XBmRNA40974| aco2.S	30.95	1	4	19	29	2.72533e+08	7.17942e+07					72.7169	30.95	19	26	10.273	4.99	3	3																	782	85.2216	7.12256
XBXL10_1g22543	XBmRNA42021| msh2.L	20.17	1	15	15	26	1.18191e+08	7.08106e+07					40.3819	17.49	13	15	24.3897	10.84	9	11																	932	104.203	5.8208
XBXL10_1g1810	XBmRNA3220| grhpr.2.L	51.65	2	11	11	27	2.87522e+08	6.89965e+07					69.4224	51.65	11	20	18.4855	25.83	7	7																	333	36.0269	6.17627
XBXL10_1g35769	XBmRNA67563| LOC108698710	13.42	1	2	2	7	1.10809e+08	68688682	47450656	42713709	39244613		4.17258	13.42	2	2	0	5.37	1	1	0	1.94876	1.6902	2.09313	5.37	5.37	5.37	8.05	1	1	1	1	1	1	1	1	149	16.8268	4.22119	calmodulin-1-like
XBXL10_1g27918	XBmRNA52420| mcm4.L	13.67	3	9	10	16	9.12641e+07	66121942					28.8967	12.98	9	9	19.1179	8.81	7	7																	863	97.0626	7.04932
XBXL10_1g34175	XBmRNA64463| tubb4b.L	38.2	7	9	12	35	1.18888e+08	6.58311e+07	2.53589e+07	3.45845e+07	2.56423e+07	2.95417e+07	49.7299	32.81	10	13	17.6106	17.53	5	6	4.83649	12.078	13.9763	12.0345	2.25	10.11	10.79	8.09	1	4	4	3	2	5	5	4	445	49.784	4.89404
XBXL10_1g27325	XBmRNA51197| mcm6.L	21.44	5	14	15	24	7.70806e+07	6.54673e+07					25.7988	17.17	12	12	26.4342	16.08	12	12																	821	92.5805	5.22412
XBXL10_1g18240	XBmRNA33617| ganab.L	23.14	1	8	18	27	2.47876e+08	6.51385e+07					61.3212	23.14	18	21	14.1765	7.12	6	6																	955	108.397	5.43994
XBXL10_1g20609	XBmRNA37892| LOC108715138	19.42	1	3	13	22	2.47876e+08	6.51385e+07					55.1339	19.42	13	17	12.5602	6.06	5	5																	973	110.275	5.69385
XBXL10_1g35956	XBmRNA67996| siva1.L	12.88	1	2	2	7	1.22949e+08	6.49199e+07					7.65595	12.88	2	4	5.38821	12.88	2	3																	163	17.7005	7.81104
XBXL10_1g829	XBmRNA1207| paics.1.L	8.95	2	7	7	10	55716783	6.45185e+07					4.57003	3.66	3	3	12.9026	8.95	7	7																	983	111.31	8.06006
XBXL10_1g42548	XBmRNA79984| psma7.S	4.45	2	1	1	3		6.42762e+07									1.88473	4.45	1	1	1.76955		2.02501		4.45		4.45		1		1		1		1		247	27.9177	8.5874	annotation error
XBXL10_1g20580	XBmRNA37846| cfl1.S	23.81	1	1	3	5	1.24404e+08	63704488					13.6522	23.81	3	4	1.93977	7.14	1	1																	168	19.1077	7.75244
XBXL10_1g32283	XBmRNA60815| rcc2.L	7.41	1	3	3	4	3.28551e+07	62942739					7.28243	7.41	3	3	3.31172	2.73	1	1																	513	55.4611	8.92432
XBXL10_1g4126	XBmRNA7594| hpgds.S	14.8	1	3	3	8	2.02981e+08	6.17616e+07					8.68501	14.8	3	6	2.33016	10.71	2	2																	196	22.5807	6.25244
XBXL10_1g37749	XBmRNA71348| LOC108699999	18.72	7	34	36	54	1.04855e+08	6.08164e+07					114.845	18.72	36	40	36.8006	7.38	14	14																	2644	281.397	5.87158
XBXL10_1g2470	XBmRNA4305| arhgef40.L	0.42	1	1	1	5	6.59322e+07	5.90087e+07	7.09621e+06		5.82013e+06		2.26202	0.42	1	1	2.18888	0.42	1	2	2.09684		1.94805		0.42		0.42		1		1		1		1		1439	162.121	6.26514	annotation error
XBXL10_1g30701	XBmRNA57913| glud1.L	10.37	2	5	5	8	3.3296e+07	57896404	28661413				3.06244	4.44	2	2	9.14108	10.37	5	5	3.64409				2.96				1				1				540	59.5513	7.94287
XBXL10_1g2936	XBmRNA5249| aldh7a1.L	12.33	2	5	5	10	6.87187e+07	5.74178e+07					13.8129	12.33	5	5	13.4906	12.33	5	5																	511	55.1044	6.68311
XBXL10_1g8113	XBmRNA15347| shmt2.L	7.66	2	4	4	6	6.76568e+07	5.60771e+07					5.54266	7.66	4	4	3.77531	3.23	2	2																	496	54.8872	8.5874
XBXL10_1g2863	XBmRNA5107| aldh2.L	9.21	1	4	4	6	9.18864e+07	5.59578e+07					9.55184	7.49	3	3	6.70455	6.53	3	3																	521	57.2133	7.6499
XBXL10_1g4392	XBmRNA8173| cirbp.S	46.99	1	5	7	13	2.12091e+08	5.503e+07					31.7301	46.99	7	10	7.97707	27.71	3	3																	166	17.8443	9.12939
XBXL10_1g43730	XBmRNA82321| hspe1.S	42.16	1	1	5	9	7.09046e+07	54596244	7.7369e+06				9.5413	42.16	5	6	1.72191	20.59	2	2	1.75142				7.84				1				1				102	11.093	8.36768
XBXL10_1g21108	XBmRNA39098| ntf2	18.9	1	2	2	5	1.63078e+08	54331769					13.2748	18.9	2	4	1.81126	6.3	1	1																	127	14.4821	5.37646
XBXL10_1g12405	XBmRNA23183| LOC108710993	6.71	2	1	1	2	4.92403e+07	5.42578e+07					2.43078	6.71	1	1	2.27542	6.71	1	1																	149	16.7147	8.39697
XBXL10_1g15884	XBmRNA29645| pclaf.S	26.83	1	1	2	4	1.10949e+08	52694925					6.25762	26.83	2	2	5.18088	13.82	1	2																	123	12.7641	8.6167
XBXL10_1g6902	XBmRNA12919| rcc1.L	5.9	2	2	2	3	2.94076e+07	5.24004e+07					4.38097	5.9	2	2	2.02809	2.36	1	1																	424	45.0335	6.40479
XBXL10_1g20157	XBmRNA37404| tkt.L	3.99	2	1	3	7	129026703	5.21211e+07					5.58145	3.99	3	4	1.61464	2.71	2	3																	627	67.9519	7.7085	annotation error
XBXL10_1g7707	XBmRNA14523| rpl31.L	18.4	1	2	2	4	104834324	52009015					7.42523	18.4	2	3	2.82465	11.2	1	1																	125	14.507	10.5649
XBXL10_1g20612	XBmRNA37897| eef1g.S	14.65	1	4	6	8	8.77905e+07	51513216					16.0459	14.65	6	7	1.67104	2.29	1	1																	437	50.2043	7.1665
XBXL10_1g14356	XBmRNA27060| mcm7.L	5.42	2	3	3	4	3.44885e+07	5.08839e+07					3.76837	3.61	2	2	3.86703	3.06	2	2																	720	81.6803	6.3667
XBXL10_1g39034	XBmRNA73621| LOC108700788	7.65	2	5	5	9	79103753	50393997					24.2683	7.65	5	8	4.41129	1.71	1	1																	876	97.0668	4.79248
XBXL10_1g35694	XBmRNA67379| aldh6a1.L	15.49	2	6	6	9	58283214	50095469					21.6704	15.49	6	8	0	1.53	1	1																	523	56.6829	7.48877
XBXL10_1g22541	XBmRNA42017| msh6.L	10.3	1	11	11	18	76157565	49611466					29.6752	9.55	10	12	11.9064	5	6	6																	1340	149.359	6.93213
XBXL10_1g21327	XBmRNA39469| top1.2.S	12.73	1	8	8	13	8.01219e+07	4.92528e+07					22.1065	12.73	8	8	15.3839	8.31	5	5																	770	90.5532	9.14404
XBXL10_1g43735	XBmRNA82329| kpna7.S	10.73	2	5	5	15	9.82619e+07	4.80723e+07					37.4716	10.73	5	10	16.9784	10.73	4	5																	522	57.652	5.41455
XBXL10_1g12062	XBmRNA22504| zp4.L	5.16	1	2	3	4		4.70657e+07									9.37764	5.16	3	4																	543	59.233	6.39209
XBXL10_1g39486	XBmRNA74418| csnk2a1.L	6.22	4	2	2	3	4.2988e+07	46500240					3.55725	6.22	2	2	0	1.49	1	1																	402	46.2434	8.27979
XBXL10_1g1428	XBmRNA2470| eef2.1.L	23.31	5	4	15	25	1.06668e+08	4.63239e+07					52.7364	23.31	15	21	4.14076	4.9	4	4																	858	95.3659	6.93213
XBXL10_1g4292	XBmRNA7966| eef2.1.S	20.51	3	3	14	22	1.06668e+08	4.63239e+07					41.5588	20.51	14	18	4.14076	4.9	4	4																	858	95.4619	6.82959
XBXL10_1g40496	XBmRNA76188| LOC108701277	9.32	1	3	3	5	7.16337e+07	46161156					6.8413	9.32	3	3	4.34282	7.06	2	2																	354	40.4654	5.96045
XBXL10_1g41052	XBmRNA77459| usp7.L	17.67	1	1	14	24	1.30638e+08	46091635					54.949	17.67	14	18	16.1927	6.93	6	6																	1126	131.074	5.50342
XBXL10_1g7149	XBmRNA13414| capza1.L	6.99	1	1	1	4	5.63753e+07	45202216					6.72905	6.99	1	2	3.35626	6.99	1	2																	286	32.8253	5.8208
XBXL10_1g25372	XBmRNA47382| LOC108705582	21.73	2	8	8	16	98614610	4.49457e+07					31.2786	21.73	8	10	22.2999	16.7	5	6																	497	53.6228	8.49951
XBXL10_1g8570	XBmRNA16176| ctsc.L	19.21	1	3	6	11	8.47703e+07	4.47495e+07					20.1657	19.21	6	7	11.0841	12.01	4	4																	458	51.5502	6.45557
XBXL10_1g40989	XBmRNA77321| hspe1.L	42.16	1	1	5	10	7.35648e+07	4.47373e+07	7.7369e+06				9.53639	42.16	5	6	4.12401	34.31	3	3	1.75142				7.84				1				1				102	11.0911	8.92432
XBXL10_1g43777	XBmRNA82396| usp7.S	17.69	1	1	14	22	1.30638e+08	4.42063e+07					52.7136	17.69	14	17	12.2918	5.16	5	5																	1125	130.951	5.52881
XBXL10_1g9759	XBmRNA18257| gstm1.S	44.75	1	9	9	13	2.05853e+08	4.4096e+07					19.1168	44.75	9	10	4.56486	15.53	3	3																	219	25.375	7.82568
XBXL10_1g30098	XBmRNA56657| LOC108695711	2.75	2	4	4	4		4.36768e+07									5.0179	2.75	4	4																	1456	159.646	6.69775	annotation error
XBXL10_1g13869	XBmRNA26363| asf1b.L	18.5	3	3	3	4	6.88049e+07	43156716					5.74187	18.5	3	3	4.26524	10.5	1	1																	200	22.3988	4.50049
XBXL10_1g13656	XBmRNA25938| XB5867546.L	11.94	1	1	1	4	7.08392e+07	43155284					10.9781	11.94	1	3	3.83881	11.94	1	1																	134	14.8055	5.09717
XBXL10_1g40065	XBmRNA75355| sumo2.L	23.16	3	2	2	4	282769566	4.27423e+07					2.59199	23.16	2	2	2.26661	23.16	2	2																	95	10.8133	5.23682
XBXL10_1g21487	XBmRNA39784| vps35.S	22.74	14	14	14	28	2.05709e+08	4.27345e+07					73.7706	20.98	13	23	7.79334	7.29	5	5																	796	91.3728	5.45264
XBXL10_1g4259	XBmRNA7871| uhrf1.S	10.88	4	9	9	11	4.99971e+07	4.2722e+07					9.45261	9.2	8	8	4.58243	4.79	3	3																	772	86.9184	8.07471
XBXL10_1g6537	XBmRNA12245| rpa1.L	20.85	2	11	11	16	1.5854e+08	4.10365e+07					29.3434	20.85	11	14	3.91756	3.94	2	2																	609	67.0277	8.06006
XBXL10_1g22263	XBmRNA41384| LOC100192369	15.43	3	4	4	7	56897480	4.08934e+07					8.21553	15.43	4	4	6.72375	10.64	3	3																	188	20.9598	11.8833
XBXL10_1g28391	XBmRNA53339| eef1d.L	8.95	2	3	6	11	1.42337e+08	4.05453e+07					9.03385	8.95	6	7	6.13301	6.01	4	4																	715	78.9545	6.50732
XBXL10_1g27900	XBmRNA52377| mcm3.L	5.7	2	5	5	12	6.75583e+07	4.04707e+07					16.8109	5.7	5	7	10.1282	3.84	4	5																	807	90.349	6.78564
XBXL10_1g36125	XBmRNA68372| psma6.L	8.94	2	2	2	4		40343157			1.0559e+07	1.68084e+07					2.4483	5.28	1	1			0	2.33689			3.66	8.94			1	2			1	2	246	27.4458	6.87354
XBXL10_1g37094	XBmRNA69956| uba1.S	17	2	12	12	20	1.67307e+08	3.95961e+07					55.0762	17	12	16	9.91669	5.67	4	4																	1059	117.922	5.73193
XBXL10_1g18205	XBmRNA33541| fkbp2.L	29.08	2	4	4	5	1.86997e+08	39424030					7.96982	29.08	4	4	2.81909	10.64	1	1																	141	15.7142	8.88037
XBXL10_1g22871	XBmRNA42610| actr2.L	6.85	2	3	3	4	5.47067e+07	39174023					4.90768	6.85	3	3	1.62616	1.52	1	1																	394	44.6511	6.55127
XBXL10_1g13872	XBmRNA26370| ddx39a.L	1.64	2	1	1	1		3.89489e+07									0	1.64	1	1																	427	49.131	5.50342	annotation error
XBXL10_1g19590	XBmRNA36255| mcm5.L	13.74	2	8	8	14	6.78964e+07	3.86794e+07					23.779	11.97	7	9	11.6437	7.48	5	5																	735	82.383	8.27979
XBXL10_1g17738	XBmRNA32685| cat.3.L	2.39	1	1	1	8	4.67957e+07	3.85942e+07	3.94308e+07	2.25051e+07	3.52188e+07	2.49928e+07	2.37379	2.39	1	1	2.3962	2.39	1	1	4.32422	4.48565	2.3731	1.91361	2.39	2.39	2.39	2.39	1	1	1	1	2	2	1	1	503	57.3733	6.88818	annotation error
XBXL10_1g27409	XBmRNA51403| pdia4.L	36.42	1	20	20	24	1.53692e+08	3.82284e+07					63.7425	36.42	20	22	6.80207	5.18	2	2																	637	71.7093	5.46533
XBXL10_1g14224	XBmRNA26832| calr.L	33.74	1	5	11	23	1.80815e+08	3.78978e+07					56.4958	33.74	11	19	9.88527	9.95	4	4																	412	48.3619	4.55127
XBXL10_1g18355	XBmRNA33770| cfl1.L	32.12	1	5	7	10	1.35203e+08	3.74881e+07					24.6479	32.12	7	8	1.93977	8.39	2	2																	274	31.029	8.92432
XBXL10_1g19975	XBmRNA36962| mcm2.L	6.32	2	5	5	8	4.52851e+07	3.73482e+07					9.58353	6.32	5	5	4.70981	4.06	3	3																	886	100.198	5.36377
XBXL10_1g5857	XBmRNA10967| acaa2.S	23.25	1	1	7	10	7.49983e+07	3.69512e+07					12.0492	17	5	6	7.38836	12.25	4	4																	400	42.1838	7.28369
XBXL10_1g39148	XBmRNA73801| grn.L	12.74	1	2	2	5	83731989	3.67849e+07					2.12983	12.74	2	3	2.11652	12.74	2	2																	1107	119.005	5.23682
XBXL10_1g30076	XBmRNA56625| prdx3.L	7.57	2	2	2	5	6.09344e+07	36708789					2.43784	7.57	2	2	2.61173	7.57	2	2	0				2.79				1				1				251	27.4102	8.25049
XBXL10_1g31899	XBmRNA60207| pold1.L	13.89	1	15	15	22	1.11256e+08	3.63993e+07					29.9878	13.89	15	16	8.34415	5.41	6	6																	1109	125.338	7.56201
XBXL10_1g27736	XBmRNA52066| cndp2.L	13.92	2	5	5	7	107956402	36080546					12.1958	13.92	5	6	2.38602	3.16	1	1																	474	52.742	5.78271
XBXL10_1g17940	XBmRNA33152| fen1.L	14.66	2	4	4	5	4.90869e+07	3.59889e+07					13.8125	14.66	4	4	3.58964	4.19	1	1																	382	42.6412	7.94287
XBXL10_1g35205	XBmRNA66462| pgk1.L	18.47	3	6	6	9	8.78841e+07	3.44823e+07					18.0742	18.47	6	7	6.78082	7.67	2	2																	417	44.554	7.06396
XBXL10_1g29461	XBmRNA55404| tubb6.S	14.8	6	2	5	20	8.89712e+07	3.38192e+07	4.73049e+07	4.65424e+07	37925349	45535585	11.1781	8.74	3	4	4.97863	5.38	2	2	7.63283	10.7117	7.95416	8.66476	5.61	8.3	5.61	5.61	2	3	2	2	3	5	3	3	446	50.1031	4.83057
XBXL10_1g13593	XBmRNA25831| pold2.L	15.12	1	5	5	7	9.25473e+07	33741051					17.5279	15.12	5	5	3.08349	6.26	2	2																	463	50.6394	4.94482
XBXL10_1g40372	XBmRNA75906| actr3.L	19.38	2	6	6	8	4.33266e+07	3.22578e+07					14.6235	16.03	5	6	4.60258	5.5	2	2																	418	47.2319	5.99854
XBXL10_1g35803	XBmRNA67639| serpina6.L	15.6	2	6	6	9	8.23389e+07	31575401					14.2816	15.6	6	7	2.3326	4.13	2	2																	436	49.4914	8.06006
XBXL10_1g32201	XBmRNA60682| LOC108696883	1.32	1	1	1	2		30819061	4.88674e+07								0	1.32	1	1	1.67446				1.32				1				1				453	50.3212	5.96045	annotation error
XBXL10_1g34718	XBmRNA65625| nudt16.L	5.66	1	1	1	2	45427621	3.07338e+07					3.65024	5.66	1	1	3.5634	5.66	1	1																	212	24.3347	7.1665
XBXL10_1g20766	XBmRNA38234| ddb1.S	6.32	1	7	7	10	4.43687e+07	2.98875e+07					3.92887	2.89	4	4	6.72942	5.53	6	6																	1140	126.752	5.23682
XBXL10_1g40814	XBmRNA76904| atic.L	17.83	2	8	8	9	7.95885e+07	29706407					24.1214	17.83	8	8	4.1768	2.55	1	1																	589	63.7876	6.55127
XBXL10_1g41892	XBmRNA78857| dppa2.L	13.79	1	3	3	3	40495066	2.96273e+07					7.35542	11.11	2	2	1.70349	2.68	1	1																	261	29.1995	7.82568
XBXL10_1g30266	XBmRNA56981| acadsb.L	1.86	1	1	1	2	44561979	29590721					0	1.86	1	1	0	1.86	1	1																	429	47.4928	7.35693	annotation error
XBXL10_1g18936	XBmRNA34892| gins3.L	22.38	1	4	4	5	3.21921e+07	29319265					9.56757	22.38	4	4	0	4.76	1	1																	210	23.904	5.74463
XBXL10_1g30535	XBmRNA57510| vps26a.L	23.31	4	6	6	8	1.09671e+08	2.83642e+07					15.5948	23.31	6	6	5.40771	9.2	2	2																	326	38.0679	6.46826
XBXL10_1g32328	XBmRNA60939| arhgef19.L	0.7	2	1	1	3	63900356	2.79204e+07					1.72011	0.7	1	1	1.76634	0.7	1	1		0				0.7				1				1			853	97.1055	7.32764	annotation error
XBXL10_1g44270	XBmRNA83211| hirip3.S	13.62	2	8	8	17	1.10562e+08	2.69374e+07					31.8876	12.15	7	11	10.0798	7.76	5	6																	683	74.8802	8.60205
XBXL10_1g30570	XBmRNA57563| hells.L	4.77	3	4	4	5	43852719	2.6733e+07					5.599	3.22	3	3	2.85304	2.39	2	2																	838	97.112	8.33838	annotation error
XBXL10_1g35650	XBmRNA67312| ech1.L	9.42	1	3	3	5	3.91574e+07	2.44273e+07					5.59836	9.42	3	3	4.95586	6.49	2	2																	308	34.0224	8.14795
XBXL10_1g17176	XBmRNA31841| calr.S	26.62	1	3	9	16	96988240	2.38364e+07					40.3802	26.62	9	14	3.81714	4.08	2	2																	417	48.8692	4.52588
XBXL10_1g30203	XBmRNA56840| tfam.L	14.56	2	5	5	6	3.67589e+07	2.36597e+07					1.62603	9.39	3	3	1.64812	8.41	3	3																	309	35.4786	10.2134
XBXL10_1g39804	XBmRNA74893| psme3.L	3.15	2	1	1	1		2.3463e+07									1.71584	3.15	1	1																	254	29.4505	6.01123	annotation error
XBXL10_1g30805	XBmRNA58138| echs1.L	10.49	1	2	2	4	6.85537e+07	2.33531e+07					9.38244	10.49	2	3	1.73803	3.15	1	1																	286	31.114	8.42627
XBXL10_1g4886	XBmRNA9139| anxa1.2.S	8.58	2	2	2	8	59505439	2.29428e+07	16521393	2.84184e+07	2.86721e+07	2.59578e+07	4.41552	4.73	1	1	3.88869	4.73	1	1	3.51317	4.03599	3.8829	9.79202	4.73	4.73	4.73	8.58	1	1	1	2	1	1	1	3	338	37.6115	7.34229
XBXL10_1g5853	XBmRNA10959| me2.S	7.95	3	4	4	6	2.81344e+07	2.28604e+07					6.33275	3.98	3	3	11.775	5.5	2	3																	654	72.9656	6.97607
XBXL10_1g36019	XBmRNA68117| psma3.L	5.49	2	1	1	1		2.26178e+07									0	5.49	1	1																	255	28.346	5.09717
XBXL10_1g7391	XBmRNA13925| cap1.L	3.78	2	2	2	3	2.26278e+07	2.2347e+07					0	1.68	1	1	2.04605	3.78	2	2																	476	51.3466	8.70459	annotation error
XBXL10_1g9320	XBmRNA17418| pola1.S	3.57	2	5	5	7	49254871	21758689					8.90206	3.57	5	6	1.95244	0.82	1	1																	1458	164.957	6.72705	annotation error
XBXL10_1g19981	XBmRNA36975| ruvbl1.L	3.07	2	1	1	1		21675601									2.51675	3.07	1	1																	456	50.3044	6.41748	annotation error
XBXL10_1g27108	XBmRNA50763| cpvl.L	8.32	1	3	3	4	6.15375e+07	2.06793e+07					4.94231	8.32	3	3	1.82024	2.29	1	1																	481	54.4749	5.42725
XBXL10_1g19191	XBmRNA35468| slc6a9.L	0.94	2	1	1	2	41297564	2.03773e+07					0	0.94	1	1	0	0.94	1	1																	638	71.4885	7.44482	annotation error
XBXL10_1g28211	XBmRNA52972| ywhaz.L	51.43	1	3	11	26	1.44314e+08	2.00365e+07	1.72556e+07	2.42394e+07	20292446	36833605	32.6996	51.43	11	15	0	3.27	1	1	4.18041	3.95236	3.69613	3.87402	11.02	7.35	10.61	7.35	3	2	3	2	3	2	3	2	245	27.7117	4.79248
XBXL10_1g29723	XBmRNA55933| ywhaz.S	47.76	1	1	10	24	1.44314e+08	2.00365e+07	2.13312e+07	2.42394e+07	20292446	36833605	32.5093	47.76	10	14	0	3.27	1	1	2.06802	3.95236	3.69613	3.87402	7.35	7.35	10.61	7.35	2	2	3	2	2	2	3	2	245	27.7307	4.76709
XBXL10_1g18068	XBmRNA33364| taldo1.L	14.5	1	5	5	8	6.07882e+07	1.9549e+07					12.8155	14.5	5	7	1.82796	2.37	1	1																	338	37.7485	6.45557
XBXL10_1g19136	XBmRNA35380| nasp.L	14.57	1	6	6	8	5.89431e+07	1.84756e+07					23.3056	14.57	6	7	3.10405	2.68	1	1																	597	65.5334	4.55127
XBXL10_1g17828	XBmRNA32880| cat.2.L	2.65	2	1	2	2		1.84568e+07									1.66401	2.65	2	2																	528	60.2078	7.63525	annotation error
XBXL10_1g7461	XBmRNA14055| LOC108708306	20.24	4	6	6	7	1.09726e+08	17167310					14.259	20.24	6	6	0	1.65	1	1																	425	47.7151	4.94482
XBXL10_1g30070	XBmRNA56614| mcmbp.L	3.98	1	2	2	2	43965038	1.69031e+07					1.94006	1.99	1	1	2.16255	1.99	1	1																	654	73.4821	6.18896	annotation error
XBXL10_1g40636	XBmRNA76504| dpp4.L	9.07	1	2	2	3	3.25039e+07	16835180					5.59375	9.07	2	2	1.9912	3.63	1	1																	441	50.7725	6.45557
XBXL10_1g43328	XBmRNA81462| arpc2.S	13.67	2	3	3	4	28055052	1.6155e+07					7.96256	13.67	3	3	2.7548	6.67	1	1																	300	34.3176	7.35693
XBXL10_1g10203	XBmRNA19085| cltc.S	2.02	4	3	3	4	2.56413e+07	1.4676e+07					2.18617	1.31	2	2	4.97951	1.37	2	2																	1683	192.346	5.66846	annotation error
XBXL10_1g31075	XBmRNA58776| hyou1.L	23.76	2	6	19	24	102731533	14628929					55.1317	23.76	19	23	2.11518	1.22	1	1																	985	111.506	5.2876
XBXL10_1g12561	XBmRNA23497| hmga2.L	16.19	1	2	2	2		1.4504e+07									0	16.19	2	2																	105	11.5949	10.814
XBXL10_1g16272	XBmRNA30566| hmga2.S	10.94	1	2	2	4	2.28466e+07	1.43238e+07					2.57786	10.94	1	1	7.68706	10.94	2	3																	128	14.2382	10.0962
XBXL10_1g24808	XBmRNA46307| rab1a.S	34.31	41	5	7	10	1.00858e+08	1.38382e+07					21.2217	34.31	7	8	1.963	3.43	1	1				0				5.39				1				1	204	22.6474	6.21436
XBXL10_1g40076	XBmRNA75378| avd.2.L	14.29	1	3	3	5	5.05135e+07	1.38e+07					2.66672	14.29	3	3	1.99744	10.39	2	2																	154	16.7384	7.34229
XBXL10_1g19856	XBmRNA36740| manf.L	8.33	2	2	2	3	4.40894e+07	1.25017e+07					1.85514	8.33	2	2	0	5	1	1																	180	20.0685	8.25049
XBXL10_1g27563	XBmRNA51710| gmds.L	7.32	2	2	2	2	21272269	1.15539e+07					2.54333	5.42	1	1	0	1.9	1	1																	369	41.4259	7.31299
XBXL10_1g18050	XBmRNA33324| pola2.L	6.69	2	3	3	4	2.44289e+07	1.10454e+07					8.39436	6.69	3	3	0	0.89	1	1																	673	75.1897	5.8208
XBXL10_1g31506	XBmRNA59532| lig1.L	4.78	1	4	4	6	2.91332e+07	1.08683e+07					9.87967	4.78	4	4	4.84157	2.25	2	2																	1068	120.008	6.55127	annotation error
XBXL10_1g30634	XBmRNA57724| nolc1.L	2.34	1	2	2	3	24319561	1.0217e+07					5.58997	2.34	2	2	1.61428	0.82	1	1																	981	100.899	9.62744	annotation error
XBXL10_1g37277	XBmRNA70358| pygl.S	4.33	7	3	3	4	2.23561e+07	1.00985e+07					7.26166	4.33	3	3	1.8102	0.82	1	1																	855	97.8114	7.60596	annotation error
XBXL10_1g28562	XBmRNA53650| LOC108695521	2.25	1	1	1	1		9.01539e+06									0	2.25	1	1																	623	72.4991	9.65674	annotation error
XBXL10_1g7285	XBmRNA13714| LOC108708239	9.49	1	2	2	2		8.04244e+06					1.98881	3.16	1	1	3.1529	6.32	1	1																	253	28.6848	8.82178
XBXL10_1g20876	XBmRNA38468| cat.2.S	4.73	1	1	2	2		7.75127e+06				2.49294e+07					0	1.33	1	1				0				3.41				1				1	528	59.8997	7.66455	annotation error
XBXL10_1g17638	XBmRNA32479| psma1.L	4.21	2	1	1	1		7.60125e+06									3.0819	4.21	1	1																	261	29.2667	6.53662	annotation error
XBXL10_1g19632	XBmRNA36319| LOC108713553	0.28	1	1	1	2	5.78005e+06	5.75443e+06					0	0.28	1	1	0	0.28	1	1																	2500	281.694	5.49072	annotation error
XBXL10_1g21010	XBmRNA38863| LOC108715283	0.33	2	1	1	9	2.34188e+09		3.64569e+07	1.11253e+09	1629841511	1.13193e+09	3.35907	0.33	1	3					0	0	1.60267	0	0.33	0.33	0.33	0.33	1	1	1	1	1	2	2	1	1796	203.614	8.19189	annotation error
Streptavidin	Streptavidin	61.72	2	6	6	87				2.09755e+09	1.22929e+09	2.19793e+09										166.836	92.5162	92.8842		61.72	58.59	53.91		6	5	4		39	23	25	128	13.3945	6.52197
SPY-tagGFPnanobody	SPY-tagGFPnanobody	59.7	37	11	11	58				1.13088e+09	7.69427e+08	1.4124e+09										56.9626	50.3518	61.4593		59.7	50	59.7		9	7	10		21	15	22	134	14.9443	9.0708
XBXL10_1g28523	XBmRNA53582| btn2a1.S	2.58	1	1	1	4	1200466575				728830744	672774742	0	2.58	1	1							0	0			2.58	2.58			1	1			1	2	465	52.6816	6.06201	annotation error
Spycatcher3	Spycatcher3	29.17	1	4	4	29				8.78644e+08	5.99295e+08	782575765										11.6338	13.2109	21.6056		16.67	25	29.17		2	3	4		8	8	13	120	12.6959	4.37354
XBXL10_1g29958	XBmRNA56422| LOC108695985	4.12	7	1	1	5	137446368		61722086	64974696	114169496	1.06482e+08	1.87067	4.12	1	1					1.71169	1.74608	2.10552	0	4.12	4.12	4.12	4.12	1	1	1	1	1	1	1	1	243	25.9248	5.88428	annotation error
XBXL10_1g34623	XBmRNA65420| kif14l.L	0.39	1	1	1	4			100110369	95596083	99895309	74071600									0	0	0	0	0.39	0.39	0.39	0.39	1	1	1	1	1	1	1	1	1540	172.716	6.82959	annotation error
XBXL10_1g2480	XBmRNA4326| selenom.L	4.44	1	1	1	2					98537745	7.41467e+07											0	0			4.44	4.44			1	1			1	1	135	15.4591	5.60498	annotation error
XBXL10_1g24537	XBmRNA45878| tfap2d.L	1.55	2	1	1	2	219439795				9.15117e+07		0	1.55	1	1							0				1.55				1				1		452	49.5667	8.14795	annotation error
XBXL10_1g27065	XBmRNA50702| LOC121394573	3.85	2	1	1	1					6.37947e+07												0				3.85				1				1		650	75.4552	8.93896	annotation error
XBXL10_1g27940	XBmRNA52451| LOC108719254	5.31	1	1	1	1					4.85851e+07												0				5.31				1				1		207	23.263	5.2876
11nm_3HB	11nm_3HB	23.33	5	9	9	34				6.95295e+07	43295607	5.90586e+07										22.056	12.5292	22.683		23.33	23.33	20.42		9	8	8		13	9	12	240	28.5148	9.42236
XBXL10_1g25815	XBmRNA48278| fxr1.S	0.89	2	1	1	3				1.9809e+07	2.98476e+07	1.78276e+07										0	0	0		0.89	0.89	0.89		1	1	1		1	1	1	675	76.1659	6.65381	annotation error
XBXL10_1g39076	XBmRNA73707| ywhab.L	32.38	3	3	6	16	1.35532e+08			2.42394e+07	2.72388e+07	36833605	20.7837	32.38	6	10						3.95236	3.69613	3.87402		7.38	7.38	7.38		2	2	2		2	2	2	244	27.7417	4.70361
XBXL10_1g26169	XBmRNA48954| ywhaq.S	28.46	7	1	6	16	1.6122e+08			2.42394e+07	2.72388e+07	36833605	20.4282	28.46	6	10						3.95236	3.69613	3.87402		7.32	7.32	7.32		2	2	2		2	2	2	246	27.6567	4.81787
XBXL10_1g6687	XBmRNA12534| ywhae.L	26.27	3	3	6	16	1.31849e+08			2.42394e+07	2.72388e+07	36833605	23.8996	26.27	6	10						3.95236	3.69613	3.87402		7.06	7.06	7.06		2	2	2		2	2	2	255	29.1695	4.77979
XBXL10_1g24380	XBmRNA45648| ywhaq.L	25.61	7	1	6	16	1.35532e+08			2.42394e+07	2.72388e+07	36833605	20.7067	25.61	6	10						3.95236	3.69613	3.87402		7.32	7.32	7.32		2	2	2		2	2	2	246	27.7347	4.83057
XBXL10_1g24276	XBmRNA45460| LOC108716232	4.72	1	1	1	2			1.06946e+07		12415372										0		2.11732		4.72		4.72		1		1		1		1		233	25.5249	5.18604	annotation error
60nm_SAH	60nm_SAH	13.62	1	2	2	4				1.38272e+07	1.2117e+07	7730601										2.57315	0	2.27943		13.62	4.23	4.23		2	1	1		2	1	1	426	52.616	5.18604
XBXL10_1g12668	XBmRNA23752| LOC108711131	3.43	1	1	1	2					1.12001e+07												0				3.43				1				2		758	85.733	8.93896	annotation error
XBXL10_1g17844	XBmRNA32962| celf1.L	2.66	1	1	1	1					9.4643e+06												0				2.66				1				1		489	52.3906	8.14795	annotation error
XBXL10_1g32211	XBmRNA60699| LOC108696881	4.73	1	1	1	1					1.70642e+06												0				4.73				1				1		317	36.2446	8.66064	annotation error
XBXL10_1g30346	XBmRNA57164| MGC82327	39.83	3	8	8	8	6.84953e+07						12.7283	39.83	8	8																					241	27.5791	6.3667
XBXL10_1g1559	XBmRNA2765| cirbp.L	37.35	1	3	5	6	8.75539e+07						16.5694	37.35	5	6																					166	17.8923	9.17334
XBXL10_1g40427	XBmRNA76031| pdia5.L	29.83	2	13	13	13	1.25755e+08						38.9992	29.83	13	13																					523	59.6142	8.03076
XBXL10_1g34448	XBmRNA65053| set.L	26.62	2	5	5	8	1.34595e+08						23.3958	26.62	5	7	5.24824	10.43	1	1																	278	32.3248	4.2085
XBXL10_1g2680	XBmRNA4706| mif.L	25.22	1	3	3	3	4.51507e+07						1.67837	25.22	3	3																					115	12.4923	7.69385
XBXL10_1g6289	XBmRNA11798| sod1.L	24.5	1	2	2	2	87111368						7.94969	24.5	2	2																					151	15.4085	5.89697
XBXL10_1g11488	XBmRNA21563| ssbp1.L	23.97	2	2	2	2	1.73809e+07						6.72057	23.97	2	2																					146	16.7328	9.75928
XBXL10_1g24391	XBmRNA45662| pdia6.L	21.49	2	7	7	8	9.28663e+07						24.9212	21.49	7	8																					442	47.768	5.2749
XBXL10_1g566	XBmRNA592| rpia.L	21.28	1	4	4	4	4.54137e+07						11.4213	21.28	4	4																					235	25.6623	6.55127
XBXL10_1g6868	XBmRNA12868| rpa2.L	19.93	2	3	3	3	78402121						10.4713	19.93	3	3																					276	29.4291	6.04932
XBXL10_1g10359	XBmRNA19354| c1qbp.S	19.37	2	2	2	2	3.90325e+07						8.40002	19.37	2	2																					191	21.9676	4.66553
XBXL10_1g12860	XBmRNA24302| gdi2.L	18.61	6	6	6	8	7.82272e+07						19.1554	18.61	6	7	0	1.79	1	1																	446	50.5244	5.61768
XBXL10_1g35886	XBmRNA67795| LOC108698765	18.14	2	7	7	7	6.05761e+07						21.8489	18.14	7	7																					474	54.811	5.98584
XBXL10_1g32548	XBmRNA61405| oat.S	17.54	2	5	5	6	7.13216e+07						19.9612	17.54	5	6																					439	47.9826	6.62451
XBXL10_1g24605	XBmRNA45994| rab10.L	17	42	1	3	4	5.72815e+07						4.7161	17	3	3								0				5.5				1				1	200	22.5546	8.38232
XBXL10_1g22314	XBmRNA41481| arpc4.S	16.07	1	3	3	3	4.98334e+07						6.19588	16.07	3	3																					168	19.6793	8.42627
XBXL10_1g3701	XBmRNA6745| wdr1.S	15.98	2	6	6	7	8.25132e+07						25.3628	15.98	6	7																					607	66.1288	6.56592
XBXL10_1g33316	XBmRNA62863| hyou1.S	15.92	2	2	15	18	1.02588e+08						39.6708	15.92	15	18																					1043	117.676	5.47803
XBXL10_1g17162	XBmRNA31805| prkcsh.S	15.37	1	3	7	7	8.20843e+07						17.0287	15.37	7	7																					514	57.3506	4.48779
XBXL10_1g25126	XBmRNA46909| gins1.S	14.8	1	2	2	2	4.63347e+07						4.614	14.8	2	2																					196	23.1237	6.90283
XBXL10_1g29125	XBmRNA54760| psma2.S	14.53	1	2	2	3	7326539						4.99245	8.55	1	1					5.51715				14.53				2				2				234	25.8182	6.80029
XBXL10_1g43819	XBmRNA82481| rps15a.S	14.49	2	1	1	1											2.88658	14.49	1	1																	138	15.6914	10.1108
XBXL10_1g31352	XBmRNA59287| park7.L	14.29	2	1	1	1							5.23793	14.29	1	1																					189	20.1567	6.04932
XBXL10_1g26972	XBmRNA50517| rpa3.L	14.05	1	1	1	1	58549494						3.67164	14.05	1	1																					121	13.2337	4.90674
XBXL10_1g41333	XBmRNA78003| eci1.L	13.76	1	3	3	4	5.98334e+07						12.2211	13.76	3	4																					298	33.1858	8.74854
XBXL10_1g42842	XBmRNA80539| vat1.S	13.47	1	3	3	4	1.7433e+08						8.24032	13.47	3	4																					475	51.5663	6.20166
XBXL10_1g41026	XBmRNA77406| MGC82602	13.38	6	2	2	2	47748750						3.99502	13.38	2	2																					142	15.6541	5.78271
XBXL10_1g14197	XBmRNA26781| prkcsh.L	13.26	1	3	7	7	5.03145e+07						13.6422	13.26	7	7																					513	57.3138	4.48779
XBXL10_1g19249	XBmRNA35579| txndc12.L	13.1	1	2	2	2	3.02958e+07						4.57766	13.1	2	2																					168	18.6543	5.56689
XBXL10_1g8328	XBmRNA15727| rnaseh2b.L	13.07	1	2	2	4	4.19269e+07						21.3473	13.07	2	4																					306	34.2218	8.99756
XBXL10_1g24765	XBmRNA46223| LOC121393880	13.07	1	1	1	1																0				13.07				1				1			306	33.7077	7.41553
XBXL10_1g21614	XBmRNA40105| nasp.S	13.05	1	5	5	6	8.30657e+07						17.4918	13.05	5	6																					590	65.002	4.4624
XBXL10_1g38927	XBmRNA73471| fkbp10.L	12.41	2	6	6	8	7.6361e+07						11.6682	12.41	6	8																					564	62.5892	5.32568
XBXL10_1g15405	XBmRNA28781| LOC108712737	12.35	1	1	1	1							3.9035	12.35	1	1																					170	18.5791	7.72314
XBXL10_1g23870	XBmRNA44608| tfrc.L	12	2	7	7	8	6.62971e+07						23.4227	12	7	8																					775	86.2678	6.15088
XBXL10_1g4039	XBmRNA7379| gar1.S	11.84	2	2	2	2	1.05739e+08						4.55153	11.84	2	2																					228	23.1615	11.1069
XBXL10_1g15004	XBmRNA27941| ppp2cal.S	11.65	3	2	2	3	6.04496e+07						16.06	11.65	2	3																					309	35.5284	5.43994
XBXL10_1g19989	XBmRNA36986| rab7a.L	11.59	2	2	2	2	2.87362e+07						4.72924	11.59	2	2																					207	23.5229	7.03467
XBXL10_1g24102	XBmRNA45090| LOC121393810	11.36	1	1	1	1			4.36944e+06												0				11.36				1				1				132	14.7983	9.62744
XBXL10_1g28104	XBmRNA52779| fabp4.L	10.53	2	1	1	1	1.58467e+08						3.1673	10.53	1	1																					133	15.0455	7.09326
XBXL10_1g38142	XBmRNA72060| pls3.S	10.47	2	5	5	5	7.38715e+07						13.5305	10.47	5	5																					640	72.0769	5.66846
XBXL10_1g24150	XBmRNA45171| LOC108717082	10.35	1	4	4	4	3.49438e+07						5.3117	10.35	4	4																					483	54.2366	5.88428
XBXL10_1g21499	XBmRNA39802| ctbs.S	10	2	3	3	5	1.47579e+08						11.9268	10	3	5																					370	41.6064	5.17334
XBXL10_1g32784	XBmRNA61865| LOC108697935	9.95	1	1	1	1	7.28402e+07						4.48894	9.95	1	1																					201	22.7135	9.14404
XBXL10_1g19074	XBmRNA35209| pgm1.L	9.89	2	4	4	6	88996416						8.89468	9.89	4	5	0	2.12	1	1																	566	62.0816	5.85889
XBXL10_1g18197	XBmRNA33529| prdx5.L	9.52	1	1	1	1	4.7917e+07						3.35638	9.52	1	1																					189	20.0534	8.36768
XBXL10_1g917	XBmRNA1377| hmgb2.L	9.43	1	3	3	3	5.93057e+07						6.71331	9.43	3	3																					212	24.2069	6.59521
XBXL10_1g36828	XBmRNA69471| tagln2.L	9.14	2	1	1	1	1.1085e+07						2.69511	9.14	1	1																					197	21.7759	8.90967
XBXL10_1g14241	XBmRNA26867| rnaseh2a.L	8.94	1	2	2	3	7.58767e+07						5.77523	8.94	2	3																					302	33.6919	5.26221
XBXL10_1g35373	XBmRNA66767| lgals9b.L	8.73	1	1	1	1															0				8.73				1				1				332	36.7981	8.77783
XBXL10_1g1801	XBmRNA3203| XB22169562.L	8.68	1	2	2	2	3.83782e+07						0	8.68	2	2																					242	27.4961	8.1333
XBXL10_1g40980	XBmRNA77309| dnajb11.L	8.38	2	3	3	3	4.14149e+07						3.41511	8.38	3	3																					358	40.7256	6.48096
XBXL10_1g4923	XBmRNA9209| LOC113939961	8.36	2	3	3	3	3.3579e+07						4.04394	8.36	3	3																					335	37.7158	5.78271
XBXL10_1g44154	XBmRNA83035| LOC108703274	8.25	2	5	5	6	4.71733e+07						15.2919	8.25	5	6																					897	100.698	5.66846
XBXL10_1g12943	XBmRNA24511| LOC108711268	7.96	2	5	5	5	1.1474e+08						13.0366	7.96	5	5																					904	100.996	6.75635
XBXL10_1g41005	XBmRNA77353| arpc1a.L	7.84	3	2	2	2	1.95402e+07						2.33926	7.84	2	2																					370	41.5957	7.7085
XBXL10_1g26093	XBmRNA48832| tf.S	7.75	2	6	6	6	7.88986e+07						15.4031	7.75	6	6																					710	78.5739	7.89893
XBXL10_1g42466	XBmRNA79809| cse1l.S	7.62	2	6	6	9	6.15562e+07						18.6084	7.62	6	9																					971	110.068	5.43994
XBXL10_1g8041	XBmRNA15196| cnpy2.L	7.58	1	1	1	1	25557514						2.97365	7.58	1	1																					211	24.1339	5.22412
XBXL10_1g34177	XBmRNA64465| pole3.L	7.48	1	1	1	1	76195540						2.31827	7.48	1	1																					147	16.8213	4.69092
XBXL10_1g11311	XBmRNA21229| alox12b.S	7.46	1	3	3	3	2.09233e+07						7.6362	7.46	3	3																					670	75.8792	6.06201
XBXL10_1g28187	XBmRNA52932| rida.L	7.19	1	1	1	1	2.15535e+07						2.33728	7.19	1	1																					139	14.6187	6.66846
XBXL10_1g3235	XBmRNA5857| oxct1.L	7.17	2	2	2	3	3.07948e+07						9.5413	7.17	2	3																					530	57.4136	7.10791
XBXL10_1g12612	XBmRNA23607| nap1l1.L	7.12	2	2	2	2	4.33807e+07						4.59836	7.12	2	2																					393	45.4879	4.4751
XBXL10_1g12467	XBmRNA23315| lta4h.L	7.06	1	3	3	3	2.34699e+07						6.74213	7.06	3	3																					609	68.9754	6.81494
XBXL10_1g42205	XBmRNA79334| LOC108702476	6.94	5	1	2	2											1.63741	4.86	1	1			1.84425				2.08				1				1		432	47.7205	5.22412
XBXL10_1g6968	XBmRNA13043| stmn1.L	6.9	4	1	1	1	29138761						2.33382	6.9	1	1																					145	16.7788	7.23975
XBXL10_1g16113	XBmRNA30178| dld.S	6.68	2	3	3	4	7.53931e+07						7.33899	6.68	3	3	0	1.96	1	1																	509	54.2439	7.53271
XBXL10_1g38850	XBmRNA73319| psmd4.S	6.65	2	2	2	2	1.54636e+07						1.88656	6.65	2	2																					376	40.5391	4.80518
XBXL10_1g37238	XBmRNA70264| siva1.S	6.63	1	1	1	1	6.09841e+07						2.87873	6.63	1	1																					196	21.6625	6.30322
XBXL10_1g31260	XBmRNA59136| aurkaip1.L	6.6	2	1	1	1															0				6.6				1				1				197	23.2863	10.1255
XBXL10_1g642	XBmRNA765| lrpap1.L	6.53	1	2	2	2	1.72659e+07						3.70184	6.53	2	2																					352	41.2743	7.00537
XBXL10_1g38294	XBmRNA72361| csnk2b.S	6.51	1	1	1	1	4.73952e+07						3.35147	6.51	1	1																					215	24.944	5.5542
XBXL10_1g4592	XBmRNA8507| hsdl2.S	6.24	1	2	2	2	1.00091e+07						2.523	6.24	2	2																					417	44.5307	7.38623
XBXL10_1g4171	XBmRNA7690| alb.S	6.1	2	3	3	3	3.16273e+07						9.16163	6.1	3	3																					607	70.2751	5.90967
XBXL10_1g20807	XBmRNA38344| ctsd.S	6.02	1	2	2	2	4.96074e+07						4.07996	6.02	2	2																					399	43.4159	5.77002
XBXL10_1g9120	XBmRNA16970| sod1.S	5.96	1	1	1	1	3.94317e+07						0	5.96	1	1																					151	15.7117	5.96045
XBXL10_1g2953	XBmRNA5276| hsd17b4.L	5.94	1	2	2	2	20162081						6.3708	5.94	2	2																					741	80.2812	7.56201
XBXL10_1g23176	XBmRNA43167| LOC121393661	5.86	2	1	1	1			3.37602e+07												2.50261				5.86				1				1				239	26.5633	7.02002
XBXL10_1g28825	XBmRNA54226| rsu1.S	5.78	1	1	1	1				1.0289e+07												0				5.78				1				1			277	31.4017	8.47021
XBXL10_1g11052	XBmRNA20802| acat1.S	5.71	1	1	1	1	4.51283e+07						4.38182	5.71	1	1																					420	44.0607	8.55811
XBXL10_1g32780	XBmRNA61857| got1.S	5.6	3	2	2	2	42478191						4.24091	5.6	2	2																					411	45.9	6.65381
XBXL10_1g30435	XBmRNA57331| pgam1.L	5.51	2	1	1	1	92126657						2.1956	5.51	1	1																					254	28.8647	6.55127
XBXL10_1g14797	XBmRNA27591| srrt.L	5.33	1	3	3	4	2.58997e+07						14.5164	5.33	3	4																					844	97.7798	5.94775
XBXL10_1g2975	XBmRNA5326| reep5.L	5.29	1	1	1	1	1.27304e+07						2.15788	5.29	1	1																					189	21.4112	8.104
XBXL10_1g7956	XBmRNA15046| LOC108708523	5.23	1	1	1	1	4.01533e+07						1.72981	5.23	1	1																					172	19.5136	4.79248
XBXL10_1g19442	XBmRNA35929| prdx6.L	4.91	2	1	1	1	67641252						2.81881	4.91	1	1																					224	25.347	6.23975	annotation error
XBXL10_1g42193	XBmRNA79321| krt15.1.S	4.87	1	1	1	1																0				4.87				1				1			431	47.6936	5.26221	annotation error
XBXL10_1g33358	XBmRNA62937| ppp2r1b.S	4.75	2	2	2	2	27089194						5.92133	4.75	2	2																					589	65.483	5.0083	annotation error
XBXL10_1g14254	XBmRNA26889| man2b1.L	4.71	1	2	2	2	4.17315e+07						7.63917	4.71	2	2																					998	113.636	6.82959	annotation error
XBXL10_1g19334	XBmRNA35733| arpc5.L	4.67	2	1	1	1	1.64352e+08						0	4.67	1	1																					150	16.3894	5.40186	annotation error
XBXL10_1g41622	XBmRNA78448| LOC108701926	4.64	1	1	1	1																	0				4.64				1				1		302	34.2693	8.77783	annotation error
XBXL10_1g23594	XBmRNA44042| LOC121393716	4.55	1	1	1	1			99431651												0				4.55				1				1				615	69.816	9.46631	annotation error
XBXL10_1g2179	XBmRNA4020| secisbp2.L	4.48	1	1	1	1																3.74375				4.48				1				1			558	61.7003	8.96826	annotation error
XBXL10_1g350	XBmRNA359| LOC108705325	4.45	1	1	1	1																0				4.45				1				1			854	96.9608	7.88428	annotation error
XBXL10_1g39314	XBmRNA74090| LOC108700895	4.32	1	1	1	4																	0	0			4.32	4.32			1	1			2	2	509	57.9114	5.2749	annotation error
XBXL10_1g11003	XBmRNA20681| micu2.S	4.19	2	1	1	1						2.87897e+07												0				4.19				1				1	430	49.0939	8.76318	annotation error
XBXL10_1g14982	XBmRNA27883| nup50.S	4.13	2	2	2	2	1.48368e+07						3.98477	4.13	2	2																					436	46.6787	7.37158	annotation error
XBXL10_1g38465	XBmRNA72658| ivd.S	4.07	1	1	1	2	4.24713e+07						2.93857	4.07	1	1	2.83275	4.07	1	1																	418	45.6553	8.14795	annotation error
XBXL10_1g10742	XBmRNA20207| prim1.S	4.05	1	2	2	2	1.72201e+07						3.9473	4.05	2	2																					420	48.9588	7.89893	annotation error
XBXL10_1g772	XBmRNA1083| uchl1.L	3.97	1	1	1	1	29779074						2.41972	3.97	1	1																					252	27.9952	6.0874	annotation error
XBXL10_1g14707	XBmRNA27481| psmb6.L	3.86	1	1	1	1											0	3.86	1	1																	233	24.8102	5.87158	annotation error
XBXL10_1g2675	XBmRNA4695| gstt1.L	3.72	1	1	1	1							0	3.72	1	1																					242	27.6362	6.55127	annotation error
XBXL10_1g40124	XBmRNA75488| srsf2.L	3.72	2	1	1	1	48770451						2.37342	3.72	1	1																					215	24.8868	11.8394	annotation error
XBXL10_1g27557	XBmRNA51698| serpinb6.L	3.69	1	1	1	1	1.27608e+07						2.66849	3.69	1	1																					379	42.6524	6.46826	annotation error
XBXL10_1g19970	XBmRNA36951| txnrd3.L	3.52	2	1	1	1	14638802						2.02669	3.52	1	1																					597	65.743	5.92236	annotation error
XBXL10_1g38955	XBmRNA73512| krt53.L	3.38	7	1	2	2	135553876						0	1.48	1	1							1.84425				1.9				1				1		474	50.0036	5.42725	annotation error
XBXL10_1g30894	XBmRNA58339| pgd.L	3.32	2	1	1	1	33732933						2.57537	3.32	1	1																					482	53.5331	7.06396	annotation error
XBXL10_1g18829	XBmRNA34716| uba2.L	3.28	1	2	2	2	1.3035e+07						0	3.28	2	2																					641	70.7597	5.18604	annotation error
XBXL10_1g6241	XBmRNA11713| cbr1.1.L	3.25	4	1	1	1	46130039						1.90811	3.25	1	1																					277	29.9347	8.47021	annotation error
XBXL10_1g13630	XBmRNA25909| LOC108711598	3.15	6	1	1	1	9.16084e+06						3.04236	3.15	1	1																					444	51.5054	6.43018	annotation error
XBXL10_1g40940	XBmRNA77233| idh1.L	3.13	2	1	1	1	1.69083e+07						0	3.13	1	1																					415	46.8194	6.13818	annotation error
XBXL10_1g35001	XBmRNA66119| gatd3alc.1.L	3.11	1	1	1	1	1.22953e+07						0	3.11	1	1																					225	24.1233	7.13721	annotation error
XBXL10_1g37063	XBmRNA69913| LOC108699168	3.02	2	1	1	1	7.13009e+07						0	3.02	1	1																					430	47.7099	8.90967	annotation error
XBXL10_1g10707	XBmRNA20112| pa2g4.S	2.82	2	1	1	1	4.28881e+07						2.3321	2.82	1	1																					390	43.4581	6.99072	annotation error
XBXL10_1g3605	XBmRNA6595| suclg1.S	2.77	1	1	1	1	3.5329e+07						1.85792	2.77	1	1																					325	34.318	9.37842	annotation error
XBXL10_1g18211	XBmRNA33552| stip1.L	2.76	2	2	2	2	1.7736e+07						3.28337	2.76	2	2																					543	62.0674	7.32764	annotation error
XBXL10_1g15719	XBmRNA29365| LOC121402032	2.74	6	1	1	1	2.60565e+09						2.01603	2.74	1	1																					401	44.2708	7.97217	annotation error
XBXL10_1g41424	XBmRNA78162| shmt1.L	2.68	1	1	1	1	14554458						2.1575	2.68	1	1																					485	53.7172	7.2251	annotation error
XBXL10_1g15986	XBmRNA29895| snd1.S	2.65	2	2	2	2	2.03372e+07						4.0199	2.65	2	2																					906	101.379	6.87354	annotation error
XBXL10_1g42264	XBmRNA79444| npepps.S	2.51	2	2	2	4	2.79873e+07						2.87182	2.51	2	2	2.06404	1.14	1	1	1.75702				1.14				1				1				875	98.3874	5.2876	annotation error
XBXL10_1g18735	XBmRNA34536| dhodh.L	2.48	1	1	1	1	94942836						2.56105	2.48	1	1																					404	43.6153	8.96826	annotation error
XBXL10_1g39153	XBmRNA73816| ubtf.L	2.43	2	1	1	1	13054970						3.15354	2.43	1	1																					699	81.4722	6.45557	annotation error
XBXL10_1g41045	XBmRNA77440| abat.L	2.4	2	1	1	2	17900672						5.36211	2.4	1	2																					500	56.2948	8.11865	annotation error
XBXL10_1g8482	XBmRNA16055| poglut3.L	2.36	1	1	1	1	28595573						0	2.36	1	1																					509	58.5996	7.38623	annotation error
XBXL10_1g39817	XBmRNA74920| vat1.L	2.25	1	1	1	1	32033030						0	2.25	1	1																					445	48.6129	6.25244	annotation error
XBXL10_1g1104	XBmRNA1724| hadh.L	2.24	1	1	1	1	48999961						0	2.24	1	1																					313	34.2918	8.55811	annotation error
XBXL10_1g4652	XBmRNA8646| hook3.S	2.22	2	1	1	1						90667216												0				2.22				1				1	721	83.3395	5.22412	annotation error
XBXL10_1g35387	XBmRNA66801| rack1.L	2.21	1	1	1	2											0	2.21	1	1		0				2.21				1				1			317	35.0465	7.69385	annotation error
XBXL10_1g25626	XBmRNA47880| prim2.S	2.14	1	1	1	1	7.20967e+06						2.41224	2.14	1	1																					513	59.5464	8.55811	annotation error
XBXL10_1g10736	XBmRNA20182| atp5f1b.S	2.1	2	1	1	1	5.08979e+07						2.24875	2.1	1	1																					525	56.3385	5.40186	annotation error
XBXL10_1g19961	XBmRNA36936| uroc1.L	2.07	1	2	2	2	1.68615e+07						1.65804	2.07	2	2																					677	74.6852	6.60986	annotation error
XBXL10_1g22673	XBmRNA42264| fbxo28.L	2.03	1	1	1	1						4.86105e+07												1.61038				2.03				1				1	345	39.0683	9.42236	annotation error
XBXL10_1g22382	XBmRNA41672| LOC108715054	1.97	4	1	3	5	4.7147e+07						3.48247	1.97	3	4	1.66739	0.44	1	1																	1826	193.854	5.31299	annotation error
XBXL10_1g2064	XBmRNA3768| vldlr.L	1.9	1	1	1	1	1.20009e+07						2.11397	1.9	1	1																					894	99.0382	4.93213	annotation error
XBXL10_1g3929	XBmRNA7184| arfip1.S	1.88	1	1	1	1																	0				1.88				1				1		373	41.7644	5.51611	annotation error
XBXL10_1g17819	XBmRNA32870| LOC121402926	1.86	1	1	1	2	136200140		68118500				0	1.86	1	1					0				1.86				1				1				323	36.173	5.19873	annotation error
XBXL10_1g20949	XBmRNA38751| cat.3.S	1.79	1	1	1	3	31750402		2.64127e+07			2.3252e+07	0	1.79	1	1					0			0	1.79			1.79	1			1	1			1	503	57.4624	6.96143	annotation error
XBXL10_1g20773	XBmRNA38247| lrrc10b.S	1.79	1	1	1	1						232150												0				1.79				1				1	335	38.6949	4.66553	annotation error
XBXL10_1g12180	XBmRNA22793| LOC108710901	1.78	1	1	1	1																	0				1.78				1				1		676	76.4922	7.10791	annotation error
XBXL10_1g16096	XBmRNA30152| mcrs1.S	1.77	2	1	1	2	73041124		77409062				0	1.77	1	1					1.65212				1.77				1				1				452	51.0058	9.39307	annotation error
XBXL10_1g31116	XBmRNA58867| LOC108696475	1.77	1	1	1	1	87557418						0	1.77	1	1																					396	46.2286	5.21143	annotation error
XBXL10_1g1013	XBmRNA1572| znf827.L	1.75	2	1	1	1							0	1.75	1	1																					1317	146.763	7.25439	annotation error
XBXL10_1g21	XBmRNA30| LOC108704872	1.74	1	1	1	1	64890792						0	1.74	1	1																					632	70.6582	7.48877	annotation error
XBXL10_1g44047	XBmRNA82855| llgl1.S	1.72	2	1	1	1	1.08838e+07						3.23716	1.72	1	1																					1047	115.715	6.62451	annotation error
XBXL10_1g22449	XBmRNA41796| LOC108704408	1.63	2	1	1	1							2.60262	1.63	1	1																					1040	114.943	9.1001	annotation error
XBXL10_1g27046	XBmRNA50666| gpnmb.L	1.51	1	1	1	1	80884152						1.87174	1.51	1	1																					597	65.4847	7.86963	annotation error
XBXL10_1g40298	XBmRNA75751| LOC108701817	1.5	24	2	2	2	9.95981e+06						6.78258	1.5	2	2																					1932	222.216	5.80811	annotation error
XBXL10_1g10694	XBmRNA20086| cs.S	1.5	2	1	1	1							0	1.5	1	1																					468	51.8134	7.57666	annotation error
XBXL10_1g8092	XBmRNA15303| naca.L	1.5	2	1	1	1	55859941						3.82598	1.5	1	1																					1002	102.151	8.70459	annotation error
XBXL10_1g28512	XBmRNA53564| LOC108719638	1.46	1	1	1	1	3.28227e+07						0	1.46	1	1																					478	54.8953	6.23975	annotation error
XBXL10_1g3690	XBmRNA6732| LOC121399270	1.44	2	1	1	1				101236862												0				1.44				1				1			418	48.2962	7.07861	annotation error
XBXL10_1g16070	XBmRNA30088| LOC121402182	1.4	1	1	1	2	37495465					4.10016e+07	2.07148	1.4	1	1								2.15302				1.4				1				1	858	93.3283	11.4731	annotation error
XBXL10_1g7282	XBmRNA13708| LOC108708236	1.34	1	1	1	1	3.83762e+07						0	1.34	1	1																					521	59.4884	6.59521	annotation error
XBXL10_1g21313	XBmRNA39444| cdh3.S	1.23	2	1	1	1	28557391						2.21949	1.23	1	1																					895	99.2983	5.12256	annotation error
XBXL10_1g9358	XBmRNA17478| tspoap1.S	1.09	1	1	1	1							3.09937	1.09	1	1																					1744	193.62	5.33838	annotation error
XBXL10_1g7420	XBmRNA13994| bcas3.L	1.08	1	1	1	2	4.93543e+07		4.86718e+07				0	1.08	1	1					0				1.08				1				1				925	101.09	6.87354	annotation error
XBXL10_1g13447	XBmRNA25537| uaca.L	1.08	1	1	1	1			3.78987e+07												0				1.08				1				1				1390	159.757	6.30322	annotation error
XBXL10_1g3290	XBmRNA5962| mtmr12.L	1.07	1	1	1	1							1.75166	1.07	1	1																					748	86.5804	7.32764	annotation error
XBXL10_1g14655	XBmRNA27418| wrap53.L	1.07	1	1	1	1							0	1.07	1	1																					654	71.1053	4.57666	annotation error
XBXL10_1g3884	XBmRNA7105| sh3rf1.S	1.07	3	1	1	1							0	1.07	1	1																					843	89.8926	8.38232	annotation error
XBXL10_1g27579	XBmRNA51747| XB5835883.L	0.99	1	1	1	1																0				0.99				1				1			705	78.4859	5.66846	annotation error
XBXL10_1g26142	XBmRNA48894| pxdn.S	0.89	1	1	1	1	43992482						0	0.89	1	1																					1461	164.256	6.771	annotation error
XBXL10_1g10764	XBmRNA20259| mars1.S	0.88	1	1	1	1																	0				0.88				1				1		914	103.387	7.25439	annotation error
XBXL10_1g35883	XBmRNA67792| wdhd1.L	0.8	1	1	1	1											1.81937	0.8	1	1																	1127	124.529	5.50342	annotation error
XBXL10_1g21956	XBmRNA40784| mrtfa.S	0.78	1	1	1	1			7.28913e+07												0				0.78				1				1				1021	111.95	6.22705	annotation error
XBXL10_1g10340	XBmRNA19316| bbx.S	0.77	1	1	1	2				3.68062e+07		5.56587e+07										0		0		0.77		0.77		1		1		1		1	904	100.687	8.36768	annotation error
XBXL10_1g27295	XBmRNA51132| cul1.L	0.77	2	1	1	1	4.95998e+08						0	0.77	1	1																					776	89.664	8.00146	annotation error
XBXL10_1g25919	XBmRNA48477| LOC108718120	0.77	2	1	1	1	109653942						0	0.77	1	1																					1040	118.188	6.94678	annotation error
XBXL10_1g3960	XBmRNA7235| smarca5.S	0.67	2	1	1	2	52712091						0	0.67	1	1	0	0.67	1	1																	1046	122.025	6.88818	annotation error
XBXL10_1g22132	XBmRNA41148| rnf123.S	0.61	1	1	1	1			90318428												0				0.61				1				1				1306	147.309	6.53662	annotation error
XBXL10_1g7869	XBmRNA14843| uggt2.L	0.59	1	1	1	1	7.32137e+07						0	0.59	1	1																					1518	172.581	6.07471	annotation error
XBXL10_1g24612	XBmRNA46001| LOC108716263	0.59	2	1	1	1	1.44418e+08						0	0.59	1	1																					2388	276.358	6.91748	annotation error
XBXL10_1g13450	XBmRNA25556| adamts7.L	0.56	1	1	1	1						3.22816e+06												0				0.56				1				1	1781	199.722	5.92236	annotation error
XBXL10_1g825	XBmRNA1196| cep135.L	0.51	1	1	1	1			4.42325e+07												0				0.51				1				1				1173	135.978	5.85889	annotation error
XBXL10_1g699	XBmRNA884| cc2d2a.L	0.37	1	1	1	2																0		0		0.37		0.37		1		1		1		1	1602	183.314	5.97314	annotation error
XBXL10_1g2119	XBmRNA3880| prune2.L	0.23	1	1	1	2															0			0	0.23			0.23	1			1	1			1	2626	294.368	4.7417	annotation error
XBXL10_1g40836	XBmRNA76976| unc80.L	0.18	1	1	1	1	1.82983e+07						0	0.18	1	1																					3363	375.19	7.28369	annotation error
XBXL10_1g20896	XBmRNA38541| XB1001290.S	0.16	1	1	1	1	77513867						1.71618	0.16	1	1																					5664	652.457	4.95752	annotation error

## Sheet: all data
							Input_inter_F4	Input_inter_F5	Input_meta_F5	MagIC_inter_F4	MagIC_inter_F5	MagIC_meta_F5
Accession	Description	ΣCoverage	Σ# Proteins	Σ# Unique Peptides	Σ# Peptides	Σ# PSMs	A5: Area	B5: Area	C5: Area	D5: Area	E5: Area	F5: Area	Score A6	Coverage A6	# Peptides A6	# PSM A6	Score B6	Coverage B6	# Peptides B6	# PSM B6	Score C6	Score D6	Score E6	Score F6	Coverage C6	Coverage D6	Coverage E6	Coverage F6	# Peptides C6	# Peptides D6	# Peptides E6	# Peptides F6	# PSM C6	# PSM D6	# PSM E6	# PSM F6	# AAs	MW [kDa]	calc. pI
CON_00220327.3	SWISS-PROT:P04264 Tax_Id=9606 Gene_Symbol=KRT1 Keratin, type II cytoskeletal 1	75.62	5	64	81	4549	86834046808	7.01152e+10	7.08806e+10	45007340176	5.63322e+10	4.67915e+10	2514.64	72.2	63	695	2773.01	73.91	73	754	3348.86	2638.07	2757.41	2138.28	73.91	75.62	75	65.22	76	71	71	55	884	771	786	659	644	65.978	8.11865
	Sequence	# PSMs	# Proteins	# Protein Groups	Protein Group Accessions	Modifications	MH+ [Da]	A5: Area	q-Value	PEP	A6	XCorr A6	XCorr B6	XCorr C6	B6	XCorr D6	C6	XCorr E6	XCorr F6	# Missed Cleavages	B5: Area	C5: Area	D5: Area	E5: Area	F5: Area	D6	E6	F6
	GSGGGSSGGSIGGR	10	1	1	CON_00220327.3		1092.5	1209043528	0	2.975e-05	High	4.01242	3.93319	3.67441	High	3.29988	High	3.70236		0	2.05706e+09	108699281	3.50369e+07	71024792	0	High	High
	GGSGGGGGGSSGGRGSGGGSSGGSIGGR	10	1	1	CON_00220327.3		2079.91	3.22536e+08	0	0.07783	High	6.39453	4.43673	5.58574	High	4.53653	High	5.13174	6.50529	1	200916807	3.80062e+08	1.95088e+08	113033173	8.79935e+07	High	High	High
	KDVDGAYMTK	12	1	1	CON_00220327.3	M8(Oxidation)	1143.53	8.96792e+07	0	0.006132	High	3.3205	3.30934	3.29542	High	2.50077	High	3.01425	2.66443	1	169448695	6.00286e+07	8.45445e+06	2.93193e+07	5.43666e+06	High	High	High
	DVDGAYMTK	15	1	1	CON_00220327.3		999.446	285885291	0	0.0007942	High	2.22637	1.87787	1.80861	High	1.61584	High	2.09184	1.74877	0	308647729	184838062	79765026	51188978	1.19696e+08	High	High	High
	DVDGAYMTK	35	1	1	CON_00220327.3	M7(Oxidation)	1015.44	6619992580	0	0.05212	High	1.85826	2.10724	1.8298	High	1.85669	High	2.02869	1.75618	0	5.4335e+09	5.98653e+09	5.26411e+09	4.11802e+09	3689122798	High	High	High
	GSGGGSSGGSIGGRGSSSGGVK	54	1	1	CON_00220327.3		1751.83	6.86087e+08	0	5.35e-09	High	5.86582	5.65806	5.32774	High	5.22474	High	5.2212	4.00499	1	909698562	1505756772	6.50722e+08	3.27316e+08	141241240	High	High	High
	GGSGGGGGGSSGGRGSGGGSSGGSIGGRGSSSGGVK	4	1	1	CON_00220327.3		2739.24	3.53919e+07	0	0.109	High	4.67665		3.04215		4.05007	High			2	0	5.96105e+07	41292336	0	0	High
	SEIDNVKK	16	3	2	CON_00220327.3;CON_00697851.1		932.505	573335073	0	0.0158	High	2.05785	2.12691	1.85018	High	1.4397	High	1.79102	1.67905	1	578118019	293011004	40405782	1.72636e+08	3.57161e+07	High	High	High
	NKYEDEINKR	50	20	11	CON_00300725.7;CON_IPI00554648.3;CON_00009867.3;CON_00299145.9;CON_00220327.3;CON_00293665.7;CON_00697851.1;CON_00462140.1;XBXL10_1g8295;XBXL10_1g8289;XBXL10_1g8291		1308.65	8020872852	0	0.01025	High	3.70003	3.46323	3.76139	High	3.93702	High	3.90545	3.5984	2	4453363553	4.38948e+09	3.29655e+09	4871622639	4.18404e+09	High	High	High
	NMQDMVEDYRNK	41	1	1	CON_00220327.3	M2(Oxidation)	1558.66	1.09889e+09	0	1.706e-05	High	4.03558	3.27655	3.23924	High	3.18427	High	3.03417	3.0034	1	256336901	3.17305e+08	2.64832e+08	99380401	1.6041e+08	High	High	High
	LRSEIDNVKK	37	3	2	CON_00220327.3;CON_00697851.1		1201.69	18827221618	0	0.001361	High	3.79915	3.60334	3.54317	High	3.61861	High	3.67646	3.6095	2	13976914201	16801516652	8.04086e+09	8053436556	9752364284	High	High	High
	YEDEINKR	24	40	19	CON_IPI00290857.2;CON_00300725.7;CON_IPI00554648.3;CON_00009867.3;CON_00299145.9;CON_00220327.3;CON_00021304.1;CON_00293665.7;CON_00697851.1;CON_00221797.1;CON_00462140.1;CON_00622240.4;CON_IPI00376379.3;XBXL10_1g8295;XBXL10_1g8289;XBXL10_1g8291;XBXL10_1g10877;XBXL10_1g10870;XBXL10_1g10871		1066.52	6456119504	0	0.008032	High	1.96031	1.94761	1.86407	High	1.85402	High	1.82619	1.92686	1	4.07321e+09	3694448402	4304846388	4.86375e+09	3934580898	High	High	High
	YEDEINK	32	43	20	CON_IPI00290857.2;CON_00300725.7;CON_IPI00554648.3;CON_00009867.3;CON_00299145.9;XBXL10_1g8291;CON_00220327.3;CON_00021304.1;CON_00293665.7;CON_00697851.1;CON_00221797.1;CON_00462140.1;CON_00622240.4;CON_IPI00376379.3;CON_IPI00241841.9;XBXL10_1g8295;XBXL10_1g8289;XBXL10_1g10877;XBXL10_1g10870;XBXL10_1g10871		910.416	15922380192	0	0.01896	High	2.1327	2.12545	1.91357	High	1.77495	High	1.92556	1.81321	0	8.65848e+09	11362991318	9786637980	9.7915e+09	9.50114e+09	High	High	High
	NKYEDEINK	25	23	12	CON_00300725.7;CON_IPI00554648.3;CON_00009867.3;CON_00299145.9;XBXL10_1g8291;CON_00220327.3;CON_00293665.7;CON_00697851.1;CON_00462140.1;CON_IPI00241841.9;XBXL10_1g8295;XBXL10_1g8289		1152.55	3188012410	0	0.08708	High	3.33727	3.50497	3.04553	High	3.26906	High	3.60094	3.18381	1	1.64644e+09	1.84262e+09	1.13915e+09	1.44402e+09	1.59798e+09	High	High	High
	LRSEIDNVK	17	3	2	CON_00220327.3;CON_00697851.1		1073.59	1.22838e+10	0	0.01514	High	2.4891	2.54887	2.52926	High	2.47714	High	2.70042	2.50258	1	8409085148	9584389345	4896020106	6023954212	6552342288	High	High	High
	NMQDMVEDYRNK	55	1	1	CON_00220327.3	M2(Oxidation); M5(Oxidation)	1574.66	1894415334	0	0.00391	High	3.98458	3.60522	3.64223	High	3.82525	High	4.0331	3.91531	1	1255403208	1736216778	2164827631	1285838642	1232039348	High	High	High
	SKAEAESLYQSK	38	1	1	CON_00220327.3		1340.67	1.55877e+10	0	0.02903	High	3.71545	3.5963	3.2745	High	3.23713	High	3.68283	3.91843	1	1.12878e+10	12763310796	5725159562	7219487990	6006338481	High	High	High
	AEAESLYQSK	21	1	1	CON_00220327.3		1125.54	24668125204	0	0.05019	High	2.57693	2.60113	2.84223	High	2.94815	High	2.91204	2.62452	0	18471564186	20537504258	20278340250	27592798594	1.77927e+10	High	High	High
	NMQDMVEDYR	25	1	1	CON_00220327.3	M2(Oxidation); M5(Oxidation)	1332.52	4.41923e+08	0	0.0007488	High	2.63679	2.36035	2.23083	High	2.34805	High	2.62825	2.37482	0	244939491	1.91059e+08	3.49299e+08	2.53801e+08	2.63634e+08	High	High	High
	DYQELMNTK	19	3	2	CON_00220327.3;CON_00622240.4	M6(Oxidation)	1157.52	790685177	0	0.1067	High	1.96786	1.98404	1.92719	High	1.98084	High	2.27475	2.24559	0	505253168	458014840	469054760	558256514	4.16982e+08	High	High	High
	SDQSRLDSELK	38	2	1	CON_00220327.3		1277.63	23900316184	0	0.001874	High	3.41638	3.35074	3.14221	High	3.31907	High	3.21835	3.37208	1	29106582850	29531242456	20392105576	2.02892e+10	1.6164e+10	High	High	High
	GGGGGGYGSGGSSYGSGGGSYGSGGGGGGGR	137	1	1	CON_00220327.3		2383.95	1.22637e+10	0	9.39e-12	High	8.31304	8.30744	8.03823	High	7.40861	High	7.56348	8.25383	0	7679519732	10251370648	6413925923	7809603494	5886985138	High	High	High
	TLLEGEESR	29	6	1	CON_00220327.3		1033.52	4.34387e+10	0	0.05543	High	2.40233	2.44819	2.41745	High	2.59895	High	2.42058	2.85833	0	35205573520	39931090504	24686786608	30958500976	25914307056	High	High	High
	GSYGSGGSSYGSGGGSYGSGGGGGGHGSYGSGSSSGGYRGGSGGGGGGSSGGR	23	1	1	CON_00220327.3		4299.71	1367112256	0	0.0001053	High	11.4576	11.7303	10.7501	High	10.9676	High	10.3723	8.22477	1	833763356	2239335198	1217997289	895685732	0	High	High	High
	LLRDYQELMNTK	42	3	2	CON_00220327.3;CON_00622240.4	M9(Oxidation)	1539.78	18176601904	0	1.395e-06	High	4.91678	4.37734	4.54507	High	4.57762	High	4.58374	4.69295	1	15995938800	1.61018e+10	1.11384e+10	1.08163e+10	1.18432e+10	High	High	High
	LLRDYQELMNTK	37	3	2	CON_00220327.3;CON_00622240.4		1523.79	14590975450	0	7.247e-07	High	4.36333	4.23579	4.13437	High	4.25325	High	4.25516	4.17633	1	5318336830	6905286970	2.31813e+09	1.84793e+09	2510607427	High	High	High
	RTNAENEFVTIKK	65	1	1	CON_00220327.3		1549.83	3.47802e+10	0	2.332e-07	High	5.10178	5.03797	4.93946	High	4.9532	High	4.84055	4.91332	2	24333632095	27066799380	1.51624e+10	1.4576e+10	15211050034	High	High	High
	GSYGSGGSSYGSGGGSYGSGGGGGGHGSYGSGSSSGGYR	99	1	1	CON_00220327.3		3312.31	16525600321	0	5.47e-06	High	10.6338	11.121	9.93304	High	9.58815	High	11.3418	9.20789	0	10252011282	1.29512e+10	9.20227e+09	12824715913	9367768160	High	High	High
	TNAENEFVTIKK	89	1	1	CON_00220327.3		1393.73	11592316732	0	0.02152	High	4.17171	4.24421	4.15566	High	4.18863	High	4.36871	4.31942	1	8.2996e+09	8987173248	11981095354	12388982704	11242608428	High	High	High
	SLVNLGGSK	23	1	1	CON_00220327.3		874.5	26750713389	0	0.002165	High	2.12439	2.13918	2.22815	High	2.01862	High	2.13599	2.14053	0	23092692584	24912154660	13006096710	15908548814	11738203698	High	High	High
	SISISVAR	53	1	1	CON_00220327.3		832.488	16034843456	0	0.01917	High	1.98364	2.00994	2.02793	High	1.97856	High	2.00046	2.12011	0	3.81467e+07	1.46853e+10	7799695832	9803198080	4550666432	High	High	High
	NSKIEISELNR	32	1	1	CON_00220327.3		1302.7	3118844136	0	3.369e-05	High	3.6393	3.23368	3.47582	High	3.18968	High	3.5207	3.22549	1	3141567704	3356589854	402223468	569118187	793443696	High	High	High
	RTNAENEFVTIK	46	1	1	CON_00220327.3		1421.74	8.78101e+09	0	0.01225	High	4.5714	4.647	4.66275	High	4.50353	High	4.70574	4.49865	1	7215563186	6833163104	5776659660	7375662748	5617457186	High	High	High
	NMQDMVEDYR	6	1	1	CON_00220327.3	M5(Oxidation)	1316.53	2.27117e+08	0	0.0001724	High	2.90767				2.01219			1.94442	0	0	0	19870072	0	3.25077e+07	High		High
	IEISELNR	36	2	2	CON_00220327.3;CON_00021304.1		973.531	79436338064	0	0.004635	High	2.41181	2.15434	2.30622	High	2.35603	High	2.32878	2.25262	0	5.23005e+10	53689472055	33578169942	4.39315e+10	47501407438	High	High	High
	MSGECAPNVSVSVSTSHTTISGGGSR	114	1	1	CON_00220327.3	M1(Oxidation); C5(Carbamidomethyl)	2581.16	4026070984	0	0.0003023	High	7.3384	7.28165	7.39051	High	7.4509	High	7.45614	6.86265	0	4207710352	6777264740	3.35428e+09	3609258974	1970506037	High	High	High
	DYQELMNTK	12	3	2	CON_00220327.3;CON_00622240.4		1141.52	731747446	0	0.004914	High	1.84347	1.78792	1.77384	High	1.73417	High	1.73565	1.82681	0	2.40114e+08	210743284	9.47309e+07	52862261	1.22065e+08	High	High	High
	FLEQQNQVLQTK	38	8	4	CON_00220327.3;CON_00021304.1;CON_00462140.1;CON_IPI00376379.3		1475.79	35664585784	0	0.0001907	High	3.7281	3.49339	2.78113	High	3.4497	High	3.68068	3.58407	0	17363731168	12397999784	17895379412	23936173390	2.11723e+10	High	High	High
	KQISNLQQSISDAEQR	31	1	1	CON_00220327.3		1844.95	4211191752	0	0.01704	High	5.07161	4.79638	5.08366	High	4.9604	High	5.26408	4.93502	1	3465127107	3982453242	5.29913e+09	5.98053e+09	4296044626	High	High	High
	YEELQITAGR	244	1	1	CON_00220327.3		1179.6	65689634032	0	3.483e-05	High	3.04826	2.98701	2.9882	High	2.92694	High	2.95506	2.91484	0	49543362327	58116766276	39589902852	50907782980	3.73092e+10	High	High	High
	SGGGFSSGSAGIINYQRR	13	1	1	CON_00220327.3		1813.9	359673771	0	0.02985	High	4.2705	3.95305	4.22423	High	4.39744	High	3.80606	3.52346	1	502135689	8.82724e+08	396506877	2.65508e+08	0	High	High	High
	MSGECAPNVSVSVSTSHTTISGGGSR	57	1	1	CON_00220327.3	C5(Carbamidomethyl)	2565.17	3404425090	0	2.253e-09	High	7.36422	7.35596	7.41579	High	7.28944	High	7.15528	6.71406	0	2.5571e+09	3301481390	1.0849e+09	1.82768e+09	5.67577e+08	High	High	High
	NMQDMVEDYRNK	12	1	1	CON_00220327.3		1542.67	1291150436	0	0.004914	High	3.68965	3.68834	3.82544	High	3.94153	High	3.61727	3.70209	1	361941250	431221472	2.58881e+08	1.29304e+08	6.80723e+07	High	High	High
	FSSCGGGGGSFGAGGGFGSR	1067	1	1	CON_00220327.3	C4(Carbamidomethyl)	1765.74	340435268	0	2.527e-08	High	5.25992	5.05643	5.61952	High	4.83276	High	5.04589	5.12722	0	261974758	490971946	1.61978e+08	279380666	2.43837e+08	High	High	High
	TNAENEFVTIK	44	1	1	CON_00220327.3		1265.64	20439016296	0	0.0001063	High	3.32314	3.28536	3.35609	High	3.30889	High	3.29562	3.34352	0	1.64224e+10	15856013076	14526243208	2.24502e+10	13813206052	High	High	High
	VRFLEQQNQVLQTK	65	8	4	CON_00220327.3;CON_00021304.1;CON_00462140.1;CON_IPI00376379.3		1730.95	38231080310	0	9.694e-08	High	5.17839	4.58118	5.08171	High	4.38237	High	4.52011	4.72282	1	19912104751	17402363472	22748964341	20471451163	25654725374	High	High	High
	QISNLQQSISDAEQRGENALK	50	1	1	CON_00220327.3		2329.17	84591357032	0	7.21e-11	High	6.62004	6.08381	6.11004	High	6.30331	High	6.35849	6.45168	1	63242677368	65893495945	1.9576e+10	21362108588	2.83032e+10	High	High	High
	SGGGFSSGSAGIINYQR	24	1	1	CON_00220327.3		1657.79	3192534311	0	0.002713	High	4.1194	4.15917	4.29647	High	4.65328	High	3.90221	4.487	0	1465616180	2238267967	1.46468e+09	1346813549	9.13693e+08	High	High	High
	TLLEGEESRMSGECAPNVSVSVSTSHTTISGGGSR	6	1	1	CON_00220327.3	M10(Oxidation); C14(Carbamidomethyl)	3595.66	1.63932e+08	0	5.477e-09	High	7.93562	7.56699	8.56407	High		High			1	3.19714e+08	4.2407e+08	0	0	0
	NMQDMVEDYR	7	1	1	CON_00220327.3		1300.53	548876482	0	7.929e-05	High	2.81815	2.40935	2.58607	High	2.28324	High	2.03678	2.10886	0	89691647	4.22013e+07	39571255	2.36698e+07	4.77509e+07	High	High	High
	QISNLQQSISDAEQR	39	1	1	CON_00220327.3		1716.85	16006619033	0	1.472e-06	High	4.14273	4.22926	4.64718	High	4.13023	High	4.12089	4.6011	0	12206409180	14451686079	16480976787	19898619470	1.39341e+10	High	High	High
	SKAEAESLYQSKYEELQITAGR	15	1	1	CON_00220327.3		2501.25	390187014	0	1.805e-14	High	8.07179	7.53418	7.88503	High	5.4705	High	5.53304		2	2596113164	3031433594	33325485	6.59694e+07	0	High	High
	NSKIEISELNRVIQR	24	1	1	CON_00220327.3		1799.01	71492896	0	0.04605	High	2.84681	3.67182	2.97121	High	3.78538	High	3.40035	3.32495	2	2090733619	1887938485	2.6651e+08	4.10547e+08	4.61554e+07	High	High	High
	NMQDMVEDYRNKYEDEINK	11	1	1	CON_00220327.3	M5(Oxidation)	2450.06	245157428	0	8.797e-07	High	4.84821	4.34609	4.1315	High		High			2	121170726	144480089	0	0	0
	LNDLEDALQQAK	46	1	1	CON_00220327.3		1357.69	75759981132	0	0.0001302	High	3.92598	3.96997	3.74192	High	3.69099	High	3.6376	3.74652	0	45001927357	53612991878	25816056182	35649631061	34625484340	High	High	High
	AEAESLYQSKYEELQITAGR	9	1	1	CON_00220327.3		2286.13	2.67807e+08	0	6.273e-11	High	6.17058	6.31838	6.72495	High	4.5814	High			1	2012613082	2289160345	36948157	0	0	High
	IEISELNRVIQR	14	2	2	CON_00220327.3;CON_00021304.1		1469.84	427816796	0	0.001526	High	2.8684	2.66824	2.84815	High	2.43307	High	2.36419	2.50839	1	9657689170	13638039302	6521624126	5157907158	835106151	High	High	High
	NKLNDLEDALQQAK	20	1	1	CON_00220327.3		1599.83	16381731920	0	1.389e-07	High	4.81705	5.16033	4.65621	High	4.76612	High	4.91057	4.72252	1	1.46536e+10	13383860216	1.0448e+10	9.94937e+09	1.00556e+10	High	High	High
	KQISNLQQSISDAEQRGENALK	26	1	1	CON_00220327.3		2457.27	12166016776	0	9.879e-13	High	8.17181	7.57481	8.08102	High	7.38617	High	7.09303	7.01518	2	9.42359e+09	9.37464e+09	3435548202	3.14596e+09	4740589053	High	High	High
	WELLQQVDTSTR	30	1	1	CON_00220327.3		1475.75	133278600	0	4.982e-05	High	4.32089	3.77044	3.38059	High	3.84447	High	3.26963	3.82374	0	8476705936	8379833448	15275084640	12622690576	12913719392	High	High	High
	SLNNQFASFIDK	43	2	1	CON_00220327.3		1383.69	89554610624	0	0.01218	High	2.97087	2.74436	2.96505	High	2.92067	High	3.30285	3.27297	0	69153358720	70976113344	43336594240	54065046592	46895856640	High	High	High
	SLDLDSIIAEVK	84	6	3	CON_00220327.3;CON_00697851.1;CON_00221797.1		1302.72	86356172768	0	0.007808	High	3.26903	3.30278	3.2772	High	3.08912	High	3.41431	3.07351	0	7.79496e+10	75772109644	52095523436	64023846599	4.59773e+10	High	High	High
	LALDLEIATYR	590	20	7	CON_IPI00554648.3;CON_IPI00306959.10;CON_IPI00853265.1;CON_IPI00290078.5;XBXL10_1g8295;XBXL10_1g8290;CON_00220327.3		1277.71	23678860064	0	1.17e-05	High	3.45539	3.37493	3.64133	High	3.42751	High	3.5266	3.47466	0	33029031143	32881500665	16168910608	14747663527	5.04712e+09	High	High	High
	FLEQQNQVLQTKWELLQQVDTSTR	97	1	1	CON_00220327.3		2932.52	13405123674	0	7.648e-05	High	7.16898	7.59419	7.10811	High	7.64935	High	6.99432	7.14698	1	21342400626	1.95767e+10	6319244492	11736272692	5904750436	High	High	High
	VRFLEQQNQVLQTKWELLQQVDTSTR	109	1	1	CON_00220327.3		3187.69	9822291454	0	0.0006508	High	9.38001	9.57024	9.69532	High	9.36751	High	9.40978	9.75239	2	18397556766	22436664142	9859168997	1.05929e+10	5059183986	High	High	High
	THNLEPYFESFINNLRR	84	1	1	CON_00220327.3		2150.08	5027595749	0	0.01404	High	4.96434	4.9749	4.95279	High	5.14255	High	4.90424	4.92245	1	32604087563	23882687000	21987516672	24687899024	4637568020	High	High	High
	THNLEPYFESFINNLR	72	1	1	CON_00220327.3		1993.98	1.75886e+10	0	1.112e-08	High	6.24364	5.99842	6.12641	High	6.01732	High	6.14418	5.95982	0	24266903048	2.07136e+10	1.60021e+10	1.98411e+10	4.62634e+09	High	High	High
	LDNLQQEIDFLTALYQAELSQMQTQISETNVILSMDNNR	5	1	1	CON_00220327.3	M22(Oxidation); M35(Oxidation)	4559.19	1534442626	0	9.006e-11	High	9.32409	7.32313	9.20958	High	6.75395	High	6.9039		0	1890106946	2228172030	1942870412	1058108327	0	High	High
	GGSGGGGGGSSGGR	3	1	1	CON_00220327.3		1006.43	0	0	0.06397			1.54641	1.52721	High		High	1.28266		0	225039	242879	0	330015	0		High
	YEELQITAGRHGDSVRNSK	7	1	1	CON_00220327.3		2160.08	0	0	0.02301			3.71429	3.65692	High	4.27167	High	3.78008		2	4.63216e+07	3.11907e+07	1.18145e+08	9.2365e+07	0	High	High
	HGDSVRNSKIEISELNR	3	1	1	CON_00220327.3		1954.01	0	0	3.266e-05			4.86178	3.74839	High		High			2	189483142	1.75214e+08	0	0	0
	YEELQITAGRHGDSVR	4	1	1	CON_00220327.3		1830.91	0	0	0.0001244			3.42046	3.18772	High	3.1427	High	2.96973		1	0	0	112678116	36991062	0	High	High
	NMQDMVEDYRNKYEDEINK	5	1	1	CON_00220327.3	M2(Oxidation); M5(Oxidation)	2466.05	0	0	5.079e-05			4.8579	5.0259	High		High			2	1030102168	712611680	0	0	0
	YEDEINKRTNAENEFVTIK	8	1	1	CON_00220327.3		2313.14	0	0	0.006682			4.41518	4.79404	High	4.57127	High	4.20951		2	5.78844e+08	4.18411e+08	381434760	133612022	0	High	High
	IEISELNRVIQRLR	13	1	1	CON_00220327.3		1739.03	0	0	0.005972			3.18476	3.26235	High	3.64071	High	3.18906		2	3.8777e+08	2.80811e+08	1474144640	1461450940	0	High	High
	EDLARLLRDYQELMNTK	29	2	2	CON_00220327.3;CON_00622240.4	M14(Oxidation)	2124.08	0	0	0.001055			3.97308	4.19185	High	4.28191	High	3.96741		2	2.72616e+08	221679603	5.77739e+08	270168442	0	High	High
	LNDLEDALQQAKEDLAR	2	1	1	CON_00220327.3		1941.99	0	0	2.586e-08			6.38616	5.33234	High		High			1	7.3082e+07	6.50753e+07	0	0	0
	NKLNDLEDALQQAKEDLAR	8	1	1	CON_00220327.3		2184.13	0	0	7.115e-12			6.81511	6.52597	High		High	5.39506		2	3.18127e+08	8.94714e+07	0	1.81905e+07	0		High
	EDLARLLRDYQELMNTK	10	2	2	CON_00220327.3;CON_00622240.4		2108.08	0	0	0.01103			3.59122	2.97928	High	3.55594	High	3.45486		2	134715464	5.47726e+07	2.34875e+08	1.68158e+08	0	High	High
	LALDLEIATYRTLLEGEESR	13	1	1	CON_00220327.3		2292.21	0	0	0.006358			4.17136	4.10931	High	4.52102	High	4.46707	4.30738	1	2649706130	2.1581e+09	3.71869e+09	3213603227	1.05255e+09	High	High	High
	WELLQQVDTSTRTHNLEPYFESFINNLR	6	1	1	CON_00220327.3		3450.71	0	0	2.468e-08			5.49268	5.6318	High	4.57711	High	3.41383		1	1.31947e+08	125198530	2.66488e+08	12012070	0	High	High
	WELLQQVDTSTRTHNLEPYFESFINNLRR	3	1	1	CON_00220327.3		3606.8	0	0	0.03716				2.3304		3.41882	High			2	0	19841722	242127915	0	0	High
	FLEQQNQVLQTKWELLQQVDTSTRTHNLEPYFESFINNLR	1	1	1	CON_00220327.3		4907.48	0	0	1.762e-07				7.13561			High			2	0	0	0	0	0
	LDNLQQEIDFLTALYQAELSQMQTQISETNVILSMDNNR	1	1	1	CON_00220327.3	M22(Oxidation)	4543.18	0	0	3.956e-12				8.42647			High			0	0	311761280	0	0	0
	SGGGGGRFSSCGGGGGSFGAGGGFGSR	3	1	1	CON_00220327.3	C11(Carbamidomethyl)	2293.97	0	0	0.02285						4.72961		6.1744		1	0	0	3.25128e+07	0	0	High	High
	SGYRSGGGFSSGSAGIINYQRR	2	1	1	CON_00220327.3		2277.11	0	0	0.01853						3.68178				2	0	0	28353743	0	0	High
	SGYRSGGGFSSGSAGIINYQR	2	1	1	CON_00220327.3		2121.01	0	0	0.00195						5.36388				1	0	0	2.45979e+07	0	0	High
	THNLEPYFESFINNLRRR	1	1	1	CON_00220327.3		2306.18	0	0	0.009523								4.13802		2	0	0	0	0	0		High
	SEIDNVK	13	3	2	CON_00220327.3;CON_00697851.1		804.41	1.68102e+09	0.001	0.03001	High	1.59318	1.34598	1.38246	High	1.31107	High	1.45681	1.30518	0	1.40412e+09	1.23689e+09	1.06946e+09	1.43281e+09	1.06399e+09	High	High	High
	RVDQLK	7	1	1	CON_00220327.3		758.452	6.11203e+08	0.002	0.06945	High	1.73838	1.73597	1.745	High	1.86976	High	1.86862		1	810464837	85357461	3.69129e+07	8.45889e+07	0	High	High
	RRVDQLK	7	1	1	CON_00220327.3		914.553	7.16509e+08	0.002	0.04263	High	1.7909	1.68354	1.46727	High		High	1.55748		2	697432805	1.6626e+08	0	8.57713e+07	0		High
	VIQRLR	1	4	1	CON_00220327.3		784.515	0	0.005	0.2548								1.30727		1	0	0	0	30685205	0		High
CON_00009865.2	SWISS-PROT:P13645 Tax_Id=9606 Gene_Symbol=KRT10 Keratin, type I cytoskeletal 10	66.95	5	39	59	4193	7.35293e+10	5.51263e+10	4.57995e+10	2.94745e+10	4.3443e+10	38791518302	2896.6	64.76	45	746	2840.33	65.09	54	730	2937.51	2378.76	2799.93	1986.17	66.1	66.44	65.6	61.55	54	53	53	44	758	649	747	563	593	59.4749	5.21143
	Sequence	# PSMs	# Proteins	# Protein Groups	Protein Group Accessions	Modifications	MH+ [Da]	A5: Area	q-Value	PEP	A6	XCorr A6	XCorr B6	XCorr C6	B6	XCorr D6	C6	XCorr E6	XCorr F6	# Missed Cleavages	B5: Area	C5: Area	D5: Area	E5: Area	F5: Area	D6	E6	F6
	SSSSGSVGESSSK	6	1	1	CON_00009865.2		1185.52	4.31998e+07	0	1.207e-05	High	2.40444	2.27921		High	1.45044		1.8877		0	4.55432e+07	0	4.77485e+06	13135562	0	High	High
	HGNSHQGEPRDYSK	28	1	1	CON_00009865.2		1611.73	1.00539e+08	0	0.0008672	High	4.76708	5.16184	4.83609	High	3.61307	High	4.2024	3.31507	1	4.68884e+08	7.64819e+08	7.25614e+07	70806831	1.50914e+07	High	High	High
	VTMQNLNDR	17	13	8	CON_00217963.3;CON_IPI00328103.3;CON_00009865.2;CON_00384444.5;CON_00225378.3;CON_00798492.2;CON_IPI00418663.3;CON_00721270.3		1090.53	5634536621	0	0.002585	High	2.50245	1.92185	1.60108	High	1.64844	High	1.60811	2.01421	0	1152129504	1267228872	5.87505e+08	4.8586e+08	688406706	High	High	High
	VTMQNLNDR	25	13	8	CON_00217963.3;CON_IPI00328103.3;CON_00009865.2;CON_00384444.5;CON_00225378.3;CON_00798492.2;CON_IPI00418663.3;CON_00721270.3	M3(Oxidation)	1106.53	9863111330	0	0.08074	High	2.58102	2.61568	2.62295	High	2.64169	High	2.63705	2.64844	0	4699302517	2.20081e+09	3878612658	4334721004	5118874086	High	High	High
	SQYEQLAEQNRK	62	1	1	CON_00009865.2		1493.74	56327562232	0	0.01181	High	3.86077	4.13868	4.04159	High	3.94815	High	3.92116	4.3256	1	43524824472	38790040440	27533434246	42651699976	26920948490	High	High	High
	SGGGGGGGGCGGGGGVSSLR	25	1	1	CON_00009865.2	C10(Carbamidomethyl)	1549.68	2301763814	0	0.001244	High	5.60255	5.49458	5.53595	High	5.50257	High	6.56028	5.45804	0	1.88602e+09	2291893791	8.87475e+08	1.98329e+09	7.17054e+08	High	High	High
	SLLEGEGSSGGGGR	22	1	1	CON_00009865.2		1262.6	24244918229	0	4.501e-05	High	2.68303	2.72959	2.67323	High	2.46201	High	2.52868	2.54744	0	1.72445e+10	15632433746	9.2384e+09	1.38461e+10	10812109768	High	High	High
	LASYLDK	48	25	13	CON_00217963.3;CON_00450768.7;CON_00009865.2;CON_00019359.3;CON_00384444.5;CON_00136056.1;CON_00225378.3;CON_IPI00290077.1;CON_00721270.3;CON_00912554.1;XBXL10_1g38958;XBXL10_1g38951;XBXL10_1g38957		809.44	60787022168	0	0.1013	High	2.05419	2.15733	1.9115	High	1.9521	High	2.09405	1.9971	0	42043828040	38071526344	2.88528e+10	39374069632	34696907176	High	High	High
	IKEWYEK	11	6	5	CON_00009865.2;CON_00798492.2;CON_00698285.3;CON_00912554.1;XBXL10_1g38951		995.519	0	0	0.1027	High	1.67226	1.71723	1.77567	High	1.83061	High	1.83161	1.84758	1	1183595606	5.99349e+08	332223808	4.74372e+08	42052645	High	High	High
	YENEVALR	24	1	1	CON_00009865.2		993.499	57853726788	0	0.009845	High	2.40357	1.87772	1.78269	High	1.87687	High	1.99394	2.18975	0	35551530410	26761335193	17441670829	29176877540	24975890408	High	High	High
	SEITELR	16	4	4	CON_00009865.2;CON_00798492.2;CON_00912554.1;XBXL10_1g42200		847.45	1588151145	0	0.01522	High	1.84996	2.10419	1.87327	High	1.84898	High	1.87878	1.85938	0	1062894964	779639085	854085216	1577299310	823304597	High	High	High
	SQYEQLAEQNR	21	1	1	CON_00009865.2		1365.64	2419319270	0	0.008332	High	3.09128	3.06648	3.09443	High	3.58436	High	3.41331	3.03673	0	1802694080	1424825188	1432839376	3613222424	1655571379	High	High	High
	LAADDFR	34	52	18	CON_00217963.3;CON_00450768.7;CON_109456;CON_00009865.2;CON_00136056.1;CON_00798492.2;CON_00912554.1;CON_18266793;CON_00384444.5;CON_00225378.3;CON_IPI00290077.1;CON_00721270.3;CON_IPI00418663.3;CON_00698285.3;CON_00708921.1;XBXL10_1g8279;XBXL10_1g38935;XBXL10_1g42200		807.4	8.7171e+10	0	0.01073	High	1.85348	2.01395	1.96806	High	1.91594	High	1.85693	1.89971	0	5.03039e+10	41248418266	2.78356e+10	45688204091	43680490412	High	High	High
	LENEIQTYR	12	3	3	CON_00009865.2;CON_00798492.2;CON_00912554.1		1165.58	2030885533	0	0.0004119	High	3.50167	2.83593	2.85261	High	2.83196	High	2.84944	2.84067	0	1.07453e+09	880996218	653748193	1320428013	1030995404	High	High	High
	DAEAWFNEK	72	6	4	CON_IPI00328103.3;CON_00009865.2;CON_IPI00418663.3;CON_00912554.1		1109.49	47934446700	0	0.0002535	High	2.58321	2.38568	2.84961	High	2.3241	High	2.56989	2.39423	0	41488650126	36592959812	26836207550	36940999348	24922236054	High	High	High
	LKYENEVALR	41	1	1	CON_00009865.2		1234.68	2.10918e+10	0	0.0004867	High	3.84083	3.50744	3.83667	High	3.75296	High	3.51046	3.52972	1	1.24183e+10	7987269322	5956521412	10968195760	8971823964	High	High	High
	ALEESNYELEGK	28	2	2	CON_00009865.2;CON_00798492.2		1381.65	44507471200	0	0.01119	High	3.03643	2.92519	2.96379	High	3.36044	High	3.07958	3.01086	0	39950860776	29499274868	25285256972	40506616808	25355567392	High	High	High
	VRALEESNYELEGK	94	2	2	CON_00009865.2;CON_00798492.2		1636.82	31700959264	0	0.005478	High	5.2388	5.117	5.01883	High	5.28457	High	5.31317	5.10761	1	27190765041	25815324098	15263748170	19568606642	15558175022	High	High	High
	QSVEADINGLRR	47	9	5	CON_00009865.2;CON_00009866.6;CON_00136056.1;CON_00798492.2;CON_00912554.1		1357.72	57524544836	0	0.04229	High	3.26707	3.31283	3.32336	High	3.25643	High	3.37518	3.33663	1	42197467170	34736767401	2.15045e+10	3.63652e+10	30781234112	High	High	High
	LAADDFRLK	10	19	10	CON_00009865.2;CON_00136056.1;CON_00798492.2;CON_00912554.1;CON_00225378.3;CON_IPI00290077.1;CON_IPI00418663.3;CON_00698285.3;XBXL10_1g42200;CON_18266793		1048.58	68838516	0	0.0001208	High	1.87086	2.4655	2.54109	High	2.37424	High	2.37455	2.30443	1	3719205489	5.7049e+09	1.80482e+09	1.25339e+09	0	High	High	High
	IRLENEIQTYR	67	2	2	CON_00009865.2;CON_00912554.1		1434.77	32786695448	0	0.03277	High	4.14446	4.05609	3.95718	High	4.27352	High	3.99271	4.16417	1	28544551680	30315167424	20586598136	29880617476	24305759712	High	High	High
	QSVEADINGLR	24	10	5	CON_00009865.2;CON_00136056.1;CON_00798492.2;CON_00912554.1;CON_00009866.6		1201.62	6887530214	0	0.0004507	High	2.66978	2.44976	1.97447	High	1.56599	High	1.90262	1.84655	0	3.99556e+09	3.4347e+09	2.09956e+09	4041833371	3103401748	High	High	High
	RVLDELTLTK	31	2	2	CON_00009865.2;CON_00912554.1		1187.7	6.61526e+09	0	0.002996	High	3.39117	3.11243	3.22767	High	3.23142	High	3.24889	3.12603	1	4721575716	4350452226	2606126967	3587687248	3022992616	High	High	High
	VLDELTLTK	46	2	2	CON_00009865.2;CON_00912554.1		1031.6	69776093860	0	0.00719	High	2.44014	2.28635	2.30479	High	2.29315	High	2.33201	2.2925	0	53509273496	44522863876	30850626678	41989088824	37997157318	High	High	High
	QSLEASLAETEGR	57	3	3	CON_00009865.2;CON_00798492.2;CON_00912554.1		1390.68	13934302480	0	0.008017	High	3.85419	3.25087	3.70078	High	3.50174	High	3.38829	3.8547	0	11365581008	4089475202	4529935584	7310016248	6001310992	High	High	High
	GSLGGGFSSGGFSGGSFSR	684	1	1	CON_00009865.2		1707.77	30989287894	0	9.995e-08	High	5.50355	5.45629	5.30411	High	5.18662	High	5.23502	4.63095	0	23920921862	26866202062	14131805308	21498593796	14223903927	High	High	High
	VTMQNLNDRLASYLDK	26	5	5	CON_00217963.3;CON_00009865.2;CON_00384444.5;CON_00225378.3;CON_00721270.3	M3(Oxidation)	1896.95	10866599204	0	0.03647	High	5.28652	5.36713	5.22662	High	5.49288	High	5.6209	4.51143	1	1.75853e+10	14256368080	1.33535e+10	11808894612	5.70307e+09	High	High	High
	ELTTEIDNNIEQISSYK	104	1	1	CON_00009865.2		1996.97	47309589264	0	5.035e-08	High	5.73353	5.29379	5.12582	High	5.3928	High	5.63919	5.6056	0	37537779016	33210764076	21199504828	3.17173e+10	24551303312	High	High	High
	AETECQNTEYQQLLDIK	42	1	1	CON_00009865.2	C5(Carbamidomethyl)	2082.96	12498978658	0	3.333e-09	High	5.6766	5.46011	5.78753	High	5.41563	High	5.32134	5.22701	0	12561863028	4548515020	5811755480	8853948196	5.63826e+09	High	High	High
	YENEVALRQSVEADINGLRR	38	1	1	CON_00009865.2		2332.2	730136204	0	0.0001898	High	3.33869	4.53145	3.99543	High	4.50961	High	3.6397	3.93656	2	3764511296	12229915702	6444133833	1609241596	559694361	High	High	High
	GSSGGGCFGGSSGGYGGLGGFGGGSFR	61	1	1	CON_00009865.2	C7(Carbamidomethyl)	2342.99	7964546222	0	4.189e-08	High	7.02136	7.27659	6.51584	High	6.48979	High	6.72136	6.80171	0	7777967314	7568073616	3060274728	5314683462	3159572011	High	High	High
	YENEVALRQSVEADINGLR	13	1	1	CON_00009865.2		2176.1	0	0	4.16e-05	High	5.75703	5.25352	5.91249	High	4.42405	High	5.48744	4.10999	1	449938700	683412369	420255947	330559571	169859611	High	High	High
	VTMQNLNDRLASYLDK	22	5	5	CON_00217963.3;CON_00009865.2;CON_00384444.5;CON_00225378.3;CON_00721270.3		1880.95	6.49601e+09	0	7.766e-09	High	5.50291	5.73839	5.8316	High	4.66761	High	5.77971	4.47141	1	5467592780	6922246172	2446756519	3915193791	8.40131e+08	High	High	High
	RNVQALEIELQSQLALK	9	1	1	CON_00009865.2		1953.11	1.04322e+08	0	9.445e-08	High	6.20716	6.63513	6.01693	High	6.19785	High	6.2834	5.17138	1	162027497	156797015	173928311	1.90976e+08	1.05803e+08	High	High	High
	ELTTEIDNNIEQISSYKSEITELRR	17	1	1	CON_00009865.2		2981.51	1368541481	0	2.034e-10	High	5.63866	6.30481	6.49918	High		High	4.26633		2	4.72409e+09	3423199345	0	204432529	0		High
	NVSTGDVNVEMNAAPGVDLTQLLNNMR	40	1	1	CON_00009865.2	M11(Oxidation); M26(Oxidation)	2904.39	10740883521	0	0.00727	High	6.77186	6.57866	6.66481	High	7.17436	High	6.60428	6.72317	0	7.55778e+09	5148930964	5786041886	6573875279	5.0797e+09	High	High	High
	DLRNVSTGDVNVEMNAAPGVDLTQLLNNMR	24	1	1	CON_00009865.2	M14(Oxidation); M29(Oxidation)	3288.59	7.96907e+08	0	2.287e-12	High	7.42423	7.08556	7.14009	High	6.93158	High	7.02326	5.7189	1	1.27123e+09	1315159614	9.27583e+08	6.58677e+08	424615232	High	High	High
	NVSTGDVNVEMNAAPGVDLTQLLNNMRSQYEQLAEQNRK	20	1	1	CON_00009865.2	M11(Oxidation); M26(Oxidation)	4379.1	527372784	0	0.0001005	High	6.64223	7.04434	8.30044	High	7.62968	High	6.7028	4.75439	2	1052360724	871026152	1212494670	5.8619e+08	2.66697e+08	High	High	High
	ELTTEIDNNIEQISSYKSEITELR	3	1	1	CON_00009865.2		2825.4	0	0	1.123e-09	High	2.58828	5.19137	3.70572	High		High			1	1.31953e+08	0	0	0	0
	NVSTGDVNVEMNAAPGVDLTQLLNNMR	38	1	1	CON_00009865.2	M26(Oxidation)	2888.39	2.06635e+09	0	5.918e-10	High	6.76305	5.51157	5.81216	High	5.20241	High	5.40053	4.6539	0	625874106	320263654	215195346	567189332	1.94192e+08	High	High	High
	DLRNVSTGDVNVEMNAAPGVDLTQLLNNMR	11	1	1	CON_00009865.2	M14(Oxidation)	3272.6	162081980	0	4.883e-12	High	5.51512	6.50216	6.31195	High	3.86311	High	4.25671	2.64475	1	44752892	1.36137e+08	112194811	0	0	High	High	High
	NVQALEIELQSQLALK	1268	1	1	CON_00009865.2		1797.01	9.3216e+09	0	0.003632	High	5.66867	5.71946	5.64437	High	5.58218	High	5.60739	5.74621	0	11314260220	9306075033	6.51851e+09	7.0992e+09	5.07681e+09	High	High	High
	NQILNLTTDNANILLQIDNAR	546	1	1	CON_00009865.2		2367.26	63640812160	0	3.317e-10	High	6.86741	7.03366	6.93883	High	6.74563	High	6.85015	6.62491	0	61565696488	5.16273e+10	2.87202e+10	34488124480	12189346165	High	High	High
	DLRNVSTGDVNVEMNAAPGVDLTQLLNNMR	4	1	1	CON_00009865.2		3256.61	8.55036e+07	0	1.311e-11	High	6.19876	5.68654	5.59276	High		High		4.27917	1	25665387	12601455	0	0	0			High
	NVSTGDVNVEMNAAPGVDLTQLLNNMR	19	1	1	CON_00009865.2		2872.39	2.22907e+09	0	7.782e-10	High	5.94186	4.87638	4.10476	High	4.42003	High	4.56784	3.70096	0	800597904	660599891	198124774	4.7841e+08	4.78887e+07	High	High	High
	ADLEMQIESLTEELAYLKK	27	1	1	CON_00009865.2		2224.14	3252654425	0	3.442e-11	High	6.45862	6.37081	5.96368	High	6.24858	High	6.36055	5.92881	1	2.11159e+09	1.72678e+09	7.0189e+08	9.38891e+08	3.25171e+08	High	High	High
	ADLEMQIESLTEELAYLKK	54	1	1	CON_00009865.2	M5(Oxidation)	2240.14	5665976220	0	8.537e-09	High	6.94034	6.87144	7.39688	High	6.91174	High	7.07245	6.56923	1	4.12194e+09	3.65363e+09	2.15429e+09	2.26496e+09	1477424793	High	High	High
	TIDDLKNQILNLTTDNANILLQIDNAR	10	1	1	CON_00009865.2		3052.63	0	0	1.637e-12	High	4.52177	6.42871	6.51666	High		High	5.58871		1	2.4747e+08	2.4593e+08	0	1.79185e+08	0		High
	ADLEMQIESLTEELAYLK	50	1	1	CON_00009865.2		2096.05	3454307449	0	1.919e-09	High	6.47915	6.29755	6.23152	High	6.1654	High	5.99019	5.71099	0	1.97755e+09	1.65895e+09	775527351	1.02163e+09	4.894e+08	High	High	High
	ADLEMQIESLTEELAYLK	61	1	1	CON_00009865.2	M5(Oxidation)	2112.04	9945462563	0	3.279e-08	High	5.97761	6.03545	6.26442	High	5.83867	High	5.82665	5.69599	0	5.26515e+09	5037001268	3494568173	3979483065	2.99321e+09	High	High	High
	YCVQLSQIQAQISALEEQLQQIR	37	1	1	CON_00009865.2	C2(Carbamidomethyl)	2746.42	6931736273	0	1.653e-11	High	7.76128	7.37484	7.34995	High	7.55455	High	7.42378	7.52112	0	1.08384e+10	3069907206	4439946211	7.75364e+09	5.35238e+08	High	High	High
	QSLEASLAETEGRYCVQLSQIQAQISALEEQLQQIR	10	1	1	CON_00009865.2	C15(Carbamidomethyl)	4118.09	268989593	0	9.606e-10	High	8.03364	9.41045	9.86372	High	5.60839	High	8.57388		1	2701517392	1389203920	925485814	952051457	0	High	High
	KDAEAWFNEK	6	2	2	CON_00009865.2;CON_IPI00418663.3		1237.58	0	0	0.008678			2.67728	3.5241	High	2.19606	High	3.80917	2.82808	1	76503590	88401248	0	84359320	0	High	High	High
	SKELTTEIDNNIEQISSYK	5	1	1	CON_00009865.2		2212.1	0	0	0.0001			3.16502		High	2.81999		3.09479		1	5119421375	0	4.47936e+09	5220536800	0	High	High
	IRLENEIQTYRSLLEGEGSSGGGGR	12	1	1	CON_00009865.2		2678.35	0	0	0.001318			5.85964	6.37771	High	6.54621	High	6.24223		2	2.26713e+08	205063499	591331837	4.3474e+08	0	High	High
	NQILNLTTDNANILLQIDNARLAADDFRLK	14	1	1	CON_00009865.2		3396.83	0	0	0.0005042			6.83386	6.12496	High	7.84803	High	7.31185	4.82012	2	1866482032	1.32686e+09	1132736192	7.88871e+08	2.32852e+07	High	High	High
	NQILNLTTDNANILLQIDNARLAADDFR	5	1	1	CON_00009865.2		3155.65	0	0	0.0003086			5.83945	5.00164	High	6.37262	High			1	273687930	8.76724e+07	150747674	0	0	High
	QSVEADINGLRRVLDELTLTK	4	2	2	CON_00009865.2;CON_00912554.1		2370.3	0	0	0.1068			3.72421		High	4.04014		3.36964		2	42472687	0	200705103	0	0	High	High
	SEITELRRNVQALEIELQSQLALK	8	1	1	CON_00009865.2		2781.55	0	0	0.0213			6.20884	5.93179	High	6.47201	High	6.67495		2	363507845	4.46063e+08	2.8697e+09	2289551919	0	High	High
	VLDELTLTKADLEMQIESLTEELAYLKK	5	1	1	CON_00009865.2	M14(Oxidation)	3252.72	0	0	3.499e-10			6.75007	5.50287	High		High			2	1.57265e+08	6.81616e+07	0	0	0
	YCVQLSQIQAQISALEEQLQQIRAETECQNTEYQQLLDIK	4	1	1	CON_00009865.2	C2(Carbamidomethyl); C28(Carbamidomethyl)	4810.37	0	0	0.0002188			11.0802	10.538	High	9.03459	High	11.1066		1	3086175712	1328624598	0	957053976	0	High	High
	HGNSHQGEPR	3	1	1	CON_00009865.2		1118.51	0	0	0.04053				2.54797			High	2.63818	1.93205	0	0	1.17801e+06	0	3.4107e+06	608452		High	High
	SSSSGSVGESSSKGPR	1	1	1	CON_00009865.2		1495.7	0	0	0.00152				3.63909			High			1	0	12454530	0	0	0
	SGGGGGGGGCGGGGGVSSLRISSSK	2	1	1	CON_00009865.2	C10(Carbamidomethyl)	2051.95	0	0	3.569e-07				4.49758		2.62389	High			1	0	29119018	6.40293e+07	0	0	High
	NVSTGDVNVEMNAAPGVDLTQLLNNMRSQYEQLAEQNRK	1	1	1	CON_00009865.2		4347.12	0	0	0.0001333				5.22607			High			2	0	0	0	0	0
	YYKTIDDLK	4	1	1	CON_00009865.2		1158.6	0	0	0.04879						2.51001		2.89507		1	0	0	74514621	174111544	0	High	High
	LKYENEVALRQSVEADINGLR	2	1	1	CON_00009865.2		2417.28	0	0	0.001095						4.92912			2.75181	2	0	0	50173144	0	0	High		High
	SEITELRR	11	4	4	CON_00009865.2;CON_00798492.2;CON_00912554.1;XBXL10_1g42200		1003.55	21183379928	0.001	0.1592	High	1.87412	2.09814	1.94207	High	1.95835	High	1.98782	1.74336	1	14821351708	1.27354e+10	7997727818	1.25285e+10	9.09296e+09	High	High	High
CON_LysC	SWISS-PROT:P15636 Protease I precursor Lysyl endopeptidase Achromobacter lyticus.	32.31	1	20	20	3112	1.56904e+11	186521277568	1.57027e+11	178527819160	1.89405e+11	187665199810	2477.44	29.4	17	458	3006.43	29.56	19	526	2918.07	3204.85	3325.68	2771.84	29.4	29.56	32.31	29.4	18	19	19	18	505	550	576	497	653	68.0834	7.23975
	Sequence	# PSMs	# Proteins	# Protein Groups	Protein Group Accessions	Modifications	MH+ [Da]	A5: Area	q-Value	PEP	A6	XCorr A6	XCorr B6	XCorr C6	B6	XCorr D6	C6	XCorr E6	XCorr F6	# Missed Cleavages	B5: Area	C5: Area	D5: Area	E5: Area	F5: Area	D6	E6	F6
	APNTPASGANGDGSMSQTQSGSTVK	46	1	1	CON_LysC		2350.06	2.20237e+09	0	5.528e-12	High	7.07388	6.28424	5.96379	High	6.50203	High	6.25385	6.19462	0	1.01573e+09	758881712	6.3437e+08	560519980	7.46734e+08	High	High	High
	APNTPASGANGDGSMSQTQSGSTVK	43	1	1	CON_LysC	M15(Oxidation)	2366.05	1.01746e+10	0	4.074e-05	High	7.17192	7.65625	7.293	High	7.46954	High	7.71523	7.0848	0	9.54132e+09	7307768543	1.02835e+10	13579944994	1.41693e+10	High	High	High
	RVLGQLHGGPSSCSATGTNR	32	1	1	CON_LysC	C13(Carbamidomethyl)	2055.01	3.38564e+09	0	1.37e-11	High	7.56441	7.25803	6.64806	High	5.26842	High	7.07966	5.86066	1	3.03733e+09	2.1899e+09	1.92119e+09	3358719265	2766736632	High	High	High
	VLGQLHGGPSSCSATGTNR	19	1	1	CON_LysC	C12(Carbamidomethyl)	1898.91	1134209062	0	0.0002688	High	5.66098	4.56716	4.55334	High	5.59273	High	5.31497	5.69239	0	1.10276e+09	575748214	7.23063e+08	1696350014	1106510392	High	High	High
	RVLGQLHGGPSSCSATGTNRSDQYGR	12	1	1	CON_LysC	C13(Carbamidomethyl)	2761.32	3.55062e+08	0	8.759e-08	High	4.82559	5.90642	6.30485	High	6.24845	High	5.1956	6.24419	2	644707720	1.00724e+09	528315363	441414669	459467819	High	High	High
	VFTSWTGGGAAASR	1174	1	1	CON_LysC		1367.67	251821665000	0	6.253e-06	High	4.48811	4.54068	4.43823	High	4.33401	High	4.47931	4.50266	0	296476144096	284238082976	219781078966	276251951926	257609066408	High	High	High
	RDQNYPGAIAIHHPNVAEKR	23	1	1	CON_LysC		2286.18	1928645540	0	0.001393	High	6.32367	6.50505	6.36093	High	6.49224	High	6.47289	6.60164	2	1832485836	675992648	1235949034	1959804786	1747600423	High	High	High
	RDQNYPGAIAIHHPNVAEK	56	1	1	CON_LysC		2130.09	76996023490	0	8.678e-10	High	6.74194	7.76779	6.62332	High	7.27817	High	6.93835	6.82547	1	52048139320	2.73711e+10	3.46751e+10	41037106628	4.19315e+10	High	High	High
	SGTLACTGSLVNNTANDRK	30	1	1	CON_LysC	C6(Carbamidomethyl)	1978.96	8998582042	0	0.0005068	High	6.72217	6.79287	6.26348	High	6.49738	High	6.84618	6.55086	1	8425436346	6810356240	5088931696	8263295876	8439998944	High	High	High
	DQNYPGAIAIHHPNVAEKR	29	1	1	CON_LysC		2130.08	9579614952	0	0.002811	High	6.1224	5.94043	5.9468	High	6.02688	High	6.17399	5.84527	1	7470966964	2157291976	4333589956	7169008872	6870257250	High	High	High
	DQNYPGAIAIHHPNVAEK	100	1	1	CON_LysC		1973.98	139327923314	0	1.047e-08	High	6.78686	6.33339	6.38534	High	6.49365	High	6.36923	6.21942	0	94855929632	42706986996	78656073154	84886103400	112047800646	High	High	High
	SGTLACTGSLVNNTANDR	21	1	1	CON_LysC	C6(Carbamidomethyl)	1850.87	478501824	0	0.0004464	High	4.49745	5.33985	5.37244	High	4.86678	High	5.45794	4.38356	0	484270498	397366102	343227278	687999322	627492280	High	High	High
	DIIRAVGAYSK	19	1	1	CON_LysC		1192.67	182679966	0	0.03051	High	2.47825	2.66805	2.68239	High	2.68137	High	2.65018	2.50349	1	1785911704	1.05574e+09	4636740940	3.81522e+09	8.85685e+08	High	High	High
	SDQYGRVFTSWTGGGAAASR	43	1	1	CON_LysC		2073.97	221598209	0	1.88e-07	High	4.54704	5.57353	5.33596	High	5.41502	High	5.3608	5.01258	1	5648430452	6418278064	8097566680	6.06491e+09	1598220497	High	High	High
	RISNSTSPTSFVAWGGGAGTTHLNVQWQPSGGVTEPGSSGSPIYSPEK	811	1	1	CON_LysC		4873.35	79562719064	0	0.0003813	High	11.2368	11.0171	11.0938	High	10.9306	High	11.3913	10.6538	1	168231758976	144136842560	237146305360	207076143424	193338732376	High	High	High
	ISNSTSPTSFVAWGGGAGTTHLNVQWQPSGGVTEPGSSGSPIYSPEK	527	1	1	CON_LysC		4717.25	25161635960	0	4.282e-13	High	10.7386	10.9898	10.164	High	10.1266	High	10.3413	9.3817	0	35307630106	2.50156e+10	33977463949	35509356324	23267453233	High	High	High
	ATYATSDFTLLELNNAANPAFNLFWAGWDRR	106	1	1	CON_LysC		3545.73	1.88095e+09	0	0.0007443	High	9.08611	8.94134	8.94501	High	9.50983	High	9.32873	8.31659	1	41102832174	8.08333e+09	2.35522e+10	20609341383	1.1582e+09	High	High	High
	ATYATSDFTLLELNNAANPAFNLFWAGWDR	11	1	1	CON_LysC		3389.62	595412538	0	5.469e-05	High	6.60664	4.99544	6.24295	High	6.82981	High	5.21764	4.4464	0	3675037918	1043194076	2160251336	2155067974	180906074	High	High	High
	VLGQLHGGPSSCSATGTNRSDQYGR	7	1	1	CON_LysC	C12(Carbamidomethyl)	2605.21	0	0	2.979e-05			3.99247	4.48709	High	4.03555	High	4.26683	3.77539	1	9.75951e+07	7.74474e+07	78627472	96332967	6.29744e+07	High	High	High
	RDIIRAVGAYSK	2	1	1	CON_LysC		1348.77	0	0	0.1082			3.22097		High	3.33711				2	104106402	0	209378647	0	0	High
	GVSGSCNIDVVCPEGDGRR	1	1	1	CON_LysC	C6(Carbamidomethyl); C12(Carbamidomethyl)	2033.91	0	0	0.03435								1.44738		1	0	0	0	20509964	0		High
CON_00019359.3	SWISS-PROT:P35527 Tax_Id=9606 Gene_Symbol=KRT9 Keratin, type I cytoskeletal 9	83.79	1	55	56	2712	4.79251e+10	3.83511e+10	4.12279e+10	2.88375e+10	35016816844	2.77413e+10	1779.6	82.34	48	388	1598.46	82.34	50	367	2382.81	1868.11	1815.37	1593.26	82.66	83.79	83.63	81.54	49	50	49	43	572	475	466	444	623	62.0919	5.30029
	Sequence	# PSMs	# Proteins	# Protein Groups	Protein Group Accessions	Modifications	MH+ [Da]	A5: Area	q-Value	PEP	A6	XCorr A6	XCorr B6	XCorr C6	B6	XCorr D6	C6	XCorr E6	XCorr F6	# Missed Cleavages	B5: Area	C5: Area	D5: Area	E5: Area	F5: Area	D6	E6	F6
	KGPAAIQK	12	1	1	CON_00019359.3		812.499	2.3188e+08	0	0.05826	High	2.73708	2.78597	2.75597	High	2.55466	High	2.94579	2.45547	1	2.66622e+08	6.69115e+07	33942974	7.17667e+07	10493549	High	High	High
	STMQELNSR	27	1	1	CON_00019359.3	M3(Oxidation)	1081.49	2.40215e+09	0	0.01349	High	2.63123	2.6273	2.62575	High	2.62812	High	2.72001	2.5044	0	2.9761e+09	2.49363e+09	8.07947e+08	1605619299	9.10932e+08	High	High	High
	GSRGGSGGSYGGGGSGGGYGGGSGSR	6	1	1	CON_00019359.3		2091.88	1.12709e+08	0	2.001e-07	High	6.52955	4.64801	5.84705	High	5.45517	High	5.59882		1	6.30169e+07	66447689	1.57061e+08	69073130	0	High	High
	GGSGGSYGGGGSGGGYGGGSGSR	165	1	1	CON_00019359.3		1791.73	9.21135e+09	0	0.001263	High	5.66798	5.46969	5.5317	High	5.99103	High	5.88187	5.23238	0	5.65016e+09	8.17282e+09	4330323302	4708218341	4.20369e+09	High	High	High
	FSSSSGYGGGSSR	31	1	1	CON_00019359.3		1235.53	11277026896	0	3.576e-05	High	3.09922	3.10258	2.71782	High	3.06494	High	2.70401	2.82315	0	9520520101	1.4319e+10	7101387997	7.93072e+09	6.74806e+09	High	High	High
	SGGGGGGGLGSGGSIR	35	1	1	CON_00019359.3		1232.6	11845042396	0	0.0007962	High	4.19465	4.61833	4.18087	High	4.14732	High	4.21138	4.16135	0	9068036087	12877371406	6.91633e+09	7962979913	5879882823	High	High	High
	GGSGGSYGGGSGSGGGSGGGYGGGSGGGHSGGSGGGHSGGSGGNYGGGSGSGGGSGGGYGGGSGSR	109	1	1	CON_00019359.3		4972.94	1.11258e+09	0	5.403e-10	High	13.667	11.7222	11.4269	High	10.4608	High	10.1159	10.7926	0	4.3952e+08	574725392	4.54361e+08	1.81549e+08	151820275	High	High	High
	STMQELNSR	11	1	1	CON_00019359.3		1065.5	1733044265	0	0.09102	High	2.76155	2.77482	2.81139	High	2.74517	High	2.80925	2.73015	0	755433609	1.07619e+09	3.11085e+08	1.71008e+08	3.05139e+08	High	High	High
	IKFEMEQNLR	34	1	1	CON_00019359.3		1307.68	2.98581e+09	0	0.0004653	High	3.0653	3.152	2.99151	High	3.02538	High	2.89679	2.96365	1	1.11304e+09	1043608277	423952078	391247672	5.23082e+08	High	High	High
	FEMEQNLR	23	1	1	CON_00019359.3	M3(Oxidation)	1082.49	8.88305e+08	0	0.05297	High	2.14069	2.1338	2.05525	High	2.45587	High	2.29039	2.14568	0	9.67492e+08	1.38707e+09	1.2543e+09	9.01807e+08	6.86033e+08	High	High	High
	IGLGGRGGSGGSYGR	16	1	1	CON_00019359.3		1350.69	340826154	0	0.002249	High	2.13133	2.5703	2.12772	High	2.21635	High	2.46009	1.94273	1	7.64692e+08	1206098828	1.22766e+09	656295507	84003659	High	High	High
	LASYLDK	48	25	13	CON_00217963.3;CON_00450768.7;CON_00009865.2;CON_00019359.3;CON_00384444.5;CON_00136056.1;CON_00225378.3;CON_IPI00290077.1;CON_00721270.3;CON_00912554.1;XBXL10_1g38958;XBXL10_1g38951;XBXL10_1g38957		809.44	60787022168	0	0.1013	High	2.05419	2.15733	1.9115	High	1.9521	High	2.09405	1.9971	0	42043828040	38071526344	2.88528e+10	39374069632	34696907176	High	High	High
	IQDWYDKK	15	1	1	CON_00019359.3		1095.55	236115616	0	0.09634	High	1.66741	1.80621	1.88317	High	1.86499	High	1.95465	1.73368	1	2.7052e+08	2.69326e+08	233334606	2.68849e+08	148017724	High	High	High
	GGSGGSHGGGSGFGGESGGSYGGGEEASGSGGGYGGGSGK	270	1	1	CON_00019359.3		3223.28	7.42381e+09	0	2.166e-15	High	10.9512	10.9268	10.6662	High	10.1551	High	10.1071	10.2901	0	3.99107e+09	4696518056	2.89788e+09	3.205e+09	2761621443	High	High	High
	IKFEMEQNLR	34	1	1	CON_00019359.3	M5(Oxidation)	1323.67	2521424714	0	0.05205	High	2.64158	2.64177	2.37227	High	2.30843	High	2.84794	2.16727	1	1716979511	2201151318	1.38897e+09	1386923622	1464368019	High	High	High
	QVLDNLTMEK	18	1	1	CON_00019359.3		1190.61	879043488	0	0.0003976	High	2.67304	2.65943	2.38626	High	2.29789	High	2.47735	2.38835	0	367977488	274597214	119749287	99737312	199268580	High	High	High
	MTLDDFR	35	1	1	CON_00019359.3	M1(Oxidation)	913.408	1377406711	0	0.1082	High	1.89848	1.92987	1.86929	High	2.01084	High	1.85185	1.81979	0	1172877152	1027770544	8.49676e+08	1004548712	1034130124	High	High	High
	IQDWYDK	38	1	1	CON_00019359.3		967.453	18493872712	0	0.01456	High	2.00574	1.95495	1.90855	High	2.07879	High	2.09407	1.94256	0	18279366300	19885569212	13191924626	15292729080	1.20652e+10	High	High	High
	QFSSSYLSR	13	1	1	CON_00019359.3		1074.52	3208130484	0	0.06721	High	2.20057	2.18915	2.24397	High	2.23427	High	2.4086	2.17753	0	1715034600	2745549245	1.59897e+09	1.6399e+09	1206715226	High	High	High
	QVLDNLTMEK	14	1	1	CON_00019359.3	M8(Oxidation)	1206.6	4940379608	0	0.03062	High	2.49989	2.55295	2.48026	High	2.13987	High	2.51083	2.62232	0	4638169860	4.40187e+09	4236603288	3975322378	3.88341e+09	High	High	High
	VQALEEANNDLENK	51	1	1	CON_00019359.3		1586.76	37186610928	0	0.004439	High	4.35429	4.31349	4.61136	High	4.16549	High	5.05784	4.90665	0	31539946088	40551789936	24610784300	28256185984	22120630116	High	High	High
	FEMEQNLR	15	1	1	CON_00019359.3		1066.5	988464976	0	0.003805	High	1.75797	1.70624	1.75066	High	1.70994	High	1.9357	1.70779	0	542951464	634104732	279155712	176044896	237781707	High	High	High
	QEYEQLIAK	11	1	1	CON_00019359.3		1121.58	1931553250	0	0.04271	High	2.84625	2.82382	1.92562	High	2.9202	High	2.8598	2.95924	0	1.08904e+09	846234348	8.79366e+08	1.21314e+09	1609939832	High	High	High
	QGVDADINGLR	24	1	1	CON_00019359.3		1157.59	13724734088	0	4.418e-05	High	3.15572	2.88156	2.80951	High	2.54916	High	2.57918	2.56313	0	9297803224	9637323312	6416567812	9452452352	8101407632	High	High	High
	NHKEEMSQLTGQNSGDVNVEINVAPGK	19	1	1	CON_00019359.3	M6(Oxidation)	2911.38	202834092	0	1.158e-10	High	8.32622	7.81035	7.86662	High	6.47617	High	6.63156	5.62254	1	229838109	458334629	3.06663e+08	1.80444e+07	139513412	High	High	High
	MTLDDFRIK	35	1	1	CON_00019359.3	M1(Oxidation)	1154.59	4.82651e+08	0	0.00789	High	2.77882	2.95033	3.08884	High	2.81673	High	2.97393	2.84133	1	1322864776	1.78586e+09	1.8808e+09	1.14887e+09	4.91865e+08	High	High	High
	KNHKEEMSQLTGQNSGDVNVEINVAPGK	2	1	1	CON_00019359.3		3023.49	0	0	5.236e-08	High	6.96446		6.93579			High			2	0	7.9109e+07	0	0	0
	TLLDIDNTR	39	1	1	CON_00019359.3		1060.56	26588413664	0	0.01009	High	2.13494	2.04194	1.99149	High	2.00909	High	2.01786	2.04501	0	2.36191e+10	24843994094	16740918200	20533598516	18651818501	High	High	High
	DQIVDLTVGNNK	78	1	1	CON_00019359.3		1315.68	22043468564	0	2.287e-05	High	3.51799	3.30709	3.7796	High	3.45713	High	3.60455	3.39905	0	18469315492	22709531498	18463398794	18256599064	12866009787	High	High	High
	NHKEEMSQLTGQNSGDVNVEINVAPGK	17	1	1	CON_00019359.3		2895.39	274364081	0	5.074e-09	High	6.87226	6.96199	6.29888	High	6.94319	High	6.62235	6.25464	1	124935288	2.22725e+08	9.6705e+07	71428101	4.77144e+07	High	High	High
	MTLDDFR	16	1	1	CON_00019359.3		897.414	1914145602	0	0.00512	High	1.78739	1.83191	1.90735	High	1.72352	High	1.8582	1.81112	0	1.03138e+09	8.75221e+08	3.82529e+08	341196318	6.72589e+08	High	High	High
	TLNDMRQEYEQLIAK	50	1	1	CON_00019359.3	M5(Oxidation)	1867.92	3653910868	0	3.81e-06	High	3.55897	3.83353	3.83062	High	3.17287	High	3.65011	3.89168	1	4.27672e+09	4.64628e+09	4.86763e+09	2.46582e+09	2.54935e+09	High	High	High
	EEMSQLTGQNSGDVNVEINVAPGK	100	1	1	CON_00019359.3	M3(Oxidation)	2532.19	111782879	0	2.682e-08	High	5.23119	5.33064	4.6256	High	4.50036	High	4.58686	4.65146	0	1.0216e+08	55901238	4.76849e+07	2.03058e+07	5.79242e+07	High	High	High
	FEMEQNLRQGVDADINGLR	10	1	1	CON_00019359.3	M3(Oxidation)	2221.07	1.09603e+08	0	1.407e-05	High	3.91471	4.96473	4.91424	High	4.80939	High	4.11664	3.89257	1	444646154	6.79332e+08	483586182	2.30383e+08	101914209	High	High	High
	NYSPYYNTIDDLK	36	1	1	CON_00019359.3		1605.74	26864824488	0	6.663e-05	High	3.54473	3.56203	3.57526	High	3.30567	High	3.36668	3.12522	0	2.07947e+10	24019050016	1.81328e+10	1.93787e+10	1.32639e+10	High	High	High
	EIETYHNLLEGGQEDFESSGAGK	35	1	1	CON_00019359.3		2510.13	32542394509	0	3.03e-10	High	7.51961	7.41004	7.92373	High	7.14789	High	7.19096	7.45483	0	35077327806	36609208384	2.25944e+10	25486591076	2.17801e+10	High	High	High
	HGVQELEIELQSQLSKK	32	1	1	CON_00019359.3		1966.06	5731319376	0	2.517e-12	High	7.60062	7.70523	7.84151	High	7.60287	High	7.52297	7.44053	1	6040982840	6.97825e+09	3611063822	3085008411	2428589873	High	High	High
	TLNDMRQEYEQLIAK	24	1	1	CON_00019359.3		1851.93	5.86818e+09	0	2.443e-06	High	4.43884	4.25081	4.41982	High	3.34293	High	4.42306	3.25568	1	2.81405e+09	3.76656e+09	1630480011	1709416251	1.07975e+09	High	High	High
	GGGGSFGYSYGGGSGGGFSASSLGGGFGGGSR	536	1	1	CON_00019359.3		2705.17	2.13125e+09	0	7.639e-08	High	7.79996	7.44519	7.05875	High	7.50454	High	7.46201	7.48832	0	2286927180	3872889877	2.013e+09	2080326913	1.83867e+09	High	High	High
	TLLDIDNTRMTLDDFR	28	1	1	CON_00019359.3	M10(Oxidation)	1954.95	2031007248	0	6.82e-05	High	2.86927	2.59676	2.30113	High	2.59531	High	2.23607	2.33269	1	1890874360	1787147723	1760919622	1.43437e+09	1.16021e+09	High	High	High
	HGVQELEIELQSQLSK	90	1	1	CON_00019359.3		1837.96	15250212202	0	0.002287	High	6.72253	7.08908	5.97331	High	5.99838	High	6.95837	7.10169	0	15658807803	18453538690	12097349535	13569153943	9559454288	High	High	High
	TLLDIDNTRMTLDDFRIK	34	1	1	CON_00019359.3	M10(Oxidation)	2196.13	297655973	0	0.004007	High	4.02113	4.44797	4.32735	High	4.55548	High	4.32949	4.2768	2	1193662383	1773986092	1079227443	726510454	2.67269e+08	High	High	High
	KDIENQYETQITQIEHEVSSSGQEVQSSAK	6	1	1	CON_00019359.3		3392.61	318082028	0	1.811e-14	High	9.38029	5.75729		High	3.59847			4.33587	1	273289785	0	253650856	0	174718730	High		High
	QEIECQNQEYSLLLSIK	24	1	1	CON_00019359.3	C5(Carbamidomethyl)	2095.04	3.31355e+08	0	1.201e-10	High	5.2413	5.38058	5.26056	High	5.10074	High	4.89145	4.90778	0	306422441	277155217	113970476	1.9128e+08	1.63147e+08	High	High	High
	EVTQLRHGVQELEIELQSQLSKK	15	1	1	CON_00019359.3		2692.46	18836396	0	0.0001332	High	7.04983	8.97987	9.59758	High	9.82003	High	7.81772	4.5664	2	4.42535e+08	673976496	3.55062e+08	2.50224e+08	2.40715e+07	High	High	High
	DIENQYETQITQIEHEVSSSGQEVQSSAK	57	1	1	CON_00019359.3		3264.52	45801665844	0	8.128e-13	High	8.28129	8.13715	7.99413	High	7.6539	High	7.93645	8.05814	0	3.79321e+10	4.50603e+10	33048952892	37420194916	26406501738	High	High	High
	SDLEMQYETLQEELMALKK	50	1	1	CON_00019359.3	M5(Oxidation); M15(Oxidation)	2331.11	3.8912e+09	0	0.0009759	High	6.61954	6.89654	6.82371	High	6.84974	High	6.94648	6.64992	1	4127493333	4.78913e+09	4.34842e+09	2922970857	2.23316e+09	High	High	High
	EVTQLRHGVQELEIELQSQLSK	25	1	1	CON_00019359.3		2564.37	1.16414e+08	0	9.73e-06	High	7.63598	9.92071	9.17354	High	10.266	High	10.0361	6.95325	1	936298158	1430116126	9.14547e+08	7.11986e+08	6.53096e+07	High	High	High
	SDLEMQYETLQEELMALKK	35	1	1	CON_00019359.3	M5(Oxidation)	2315.11	7.14563e+08	0	2.414e-09	High	5.83355	5.5328	5.93929	High	5.60895	High	5.70228	5.43212	1	234165774	3.35343e+08	3.02793e+08	2.36368e+08	112263478	High	High	High
	SDLEMQYETLQEELMALKK	22	1	1	CON_00019359.3		2299.12	832961041	0	5.406e-10	High	6.2749	5.64294	5.81701	High	5.71272	High	5.12421	4.36647	1	419941766	4.6592e+08	1.47798e+08	214233328	8.26875e+07	High	High	High
	SDLEMQYETLQEELMALK	40	1	1	CON_00019359.3	M5(Oxidation); M15(Oxidation)	2203.01	1080221539	0	0.001361	High	5.54666	5.46682	5.13516	High	5.9312	High	5.57368	5.34958	0	1180179904	2137778334	1154795612	983921896	1116056940	High	High	High
	SDLEMQYETLQEELMALK	24	1	1	CON_00019359.3	M5(Oxidation)	2187.02	100999662	0	1.2e-08	High	5.10906		3.92137		4.1277	High	3.813	3.44913	0	0	26435396	25430233	0	18164361	High	High	High
	NYSPYYNTIDDLKDQIVDLTVGNNK	29	1	1	CON_00019359.3		2902.41	2675879922	0	2.053e-09	High	6.47587	6.17038	6.50456	High		High	5.96961		1	11348653000	1.14068e+10	0	1765360572	0		High
	QGVDADINGLRQVLDNLTMEK	34	1	1	CON_00019359.3	M19(Oxidation)	2345.18	7532267160	0	0.02314	High	5.34998	5.61601	5.73206	High	5.36792	High	5.75661	5.0237	1	8071453223	9744015433	7.82453e+09	5392781828	3.55507e+09	High	High	High
	SDLEMQYETLQEELMALK	13	1	1	CON_00019359.3		2171.03	282934549	0	1.13e-08	High	5.65322	5.29045	4.77837	High	3.16991	High	4.14047	4.66059	0	92276728	71752916	0	6.70466e+07	3.07977e+07	High	High	High
	QGVDADINGLRQVLDNLTMEK	22	1	1	CON_00019359.3		2329.18	1.5136e+09	0	3.212e-07	High	5.58394	5.69134	5.07316	High	5.30626	High	5.14355	3.85095	1	8.33694e+08	985198097	156201792	489786990	9.29578e+07	High	High	High
	NRYCGQLQMIQEQISNLEAQITDVR	7	1	1	CON_00019359.3	C4(Carbamidomethyl); M9(Oxidation)	3023.46	201476929	0	0.0009124	High	7.29841	6.62621		High	7.03866		7.60626		1	226770981	0	109277870	81651504	0	High	High
	FEMEQNLRQGVDADINGLRQVLDNLTMEK	13	1	1	CON_00019359.3	M3(Oxidation); M27(Oxidation)	3408.65	45386920	0	8.96e-05	High	3.25411	6.59701	6.99309	High	6.9332	High	5.7938		2	372091496	635714952	431734032	1.78127e+08	0	High	High
	NRYCGQLQMIQEQISNLEAQITDVR	1	1	1	CON_00019359.3	C4(Carbamidomethyl)	3007.48	0	0	2.849e-12	High	5.84828								1	0	0	0	0	0
	YCGQLQMIQEQISNLEAQITDVR	12	1	1	CON_00019359.3	C2(Carbamidomethyl); M7(Oxidation)	2753.33	1.1632e+08	0	2.774e-10	High	6.33757	5.74082	6.35829	High	5.47969	High	6.33491	4.63984	0	1.26459e+08	115300540	25833497	75878068	3.13538e+07	High	High	High
	YCGQLQMIQEQISNLEAQITDVR	1	1	1	CON_00019359.3	C2(Carbamidomethyl)	2737.33	0	0	7.827e-08	High	4.13664								0	0	0	0	0	0
	IKFEMEQNLRQGVDADINGLR	11	1	1	CON_00019359.3	M5(Oxidation)	2462.25	0	0	0.005589			4.25107	4.29088	High	4.35057	High	4.19218	3.62358	2	1.05913e+08	137759160	4.94266e+07	7.50146e+07	4.80538e+07	High	High	High
	MTLDDFRIK	4	1	1	CON_00019359.3		1138.59	0	0	0.001301			2.64546	2.70499	High	2.63357	High			1	140093240	362697421	9.34474e+07	0	0	High
	LASYLDKVQALEEANNDLENK	5	1	1	CON_00019359.3		2377.19	0	0	4.249e-11			7.12208	7.04604	High		High	4.45317		1	120175991	492007323	0	30432420	0		High
	TLLDIDNTRMTLDDFR	3	1	1	CON_00019359.3		1938.96	0	0	0.0004263			2.69965	2.6074	High	2.36901	High			1	4.82839e+07	0	20416745	0	0	High
	YCGQLQMIQEQISNLEAQITDVRQEIECQNQEYSLLLSIK	1	1	1	CON_00019359.3	C2(Carbamidomethyl); M7(Oxidation); C28(Carbamidomethyl)	4829.34	0	0	1.136e-11			8.89399		High					1	172131408	0	0	0	0
	SGGGGGGGLGSGGSIRSSYSR	3	1	1	CON_00019359.3		1812.86	0	0	0.02244				3.11067		4.07419	High	3.72137		1	0	1.55736e+07	56092562	2.59133e+07	0	High	High
	VQALEEANNDLENKIQDWYDK	1	1	1	CON_00019359.3		2535.2	0	0	0.000823				3.6849			High			1	0	3.04354e+08	0	0	0
	TLLDIDNTRMTLDDFRIK	4	1	1	CON_00019359.3		2180.14	0	0	0.0002775				3.11806		3.06493	High			2	0	2.70649e+07	10074150	0	0	High
	GGSGGSYGRGSRGGSGGSYGGGGSGGGYGGGSGSR	1	1	1	CON_00019359.3		2870.22	0	0	0.01066						6.58082				2	0	0	1.51981e+07	0	0	High
	STMQELNSRLASYLDK	3	1	1	CON_00019359.3	M3(Oxidation)	1871.91	0	0	0.02939						4.12675				1	0	0	62476597	0	0	High
	STMQELNSRLASYLDK	1	1	1	CON_00019359.3		1855.92	0	0	0.01537						3.11501				1	0	0	5.02973e+07	0	0	High
	FEMEQNLRQGVDADINGLRQVLDNLTMEK	1	1	1	CON_00019359.3	M27(Oxidation)	3392.66	0	0	0.009951						4.71519				2	0	0	3.22216e+07	0	0	High
	GGSGGSYGR	6	1	1	CON_00019359.3		797.354	2.92271e+07	0.001	0.02563	High	1.76911	1.75974		High					0	3.07392e+07	0	0	0	0
	FSSSSGYGGGSSRVCGR	2	1	1	CON_00019359.3	C15(Carbamidomethyl)	1707.75	0	0.001	0.1568						2.45379		2.46005		1	0	0	2.36324e+07	0	0	High	High
CON_00021304.1	SWISS-PROT:P35908 Tax_Id=9606 Gene_Symbol=KRT2 Keratin, type II cytoskeletal 2 epidermal	93.02	4	59	82	2311	5.11107e+10	3.02579e+10	29989944789	2.47408e+10	2.94464e+10	3.14428e+10	1145.08	88.06	63	340	1257.63	90.08	73	371	1584.99	1216.46	1330.46	982.144	92.25	93.02	91.78	87.13	75	75	73	61	484	384	410	322	645	65.8254	8.00146
	Sequence	# PSMs	# Proteins	# Protein Groups	Protein Group Accessions	Modifications	MH+ [Da]	A5: Area	q-Value	PEP	A6	XCorr A6	XCorr B6	XCorr C6	B6	XCorr D6	C6	XCorr E6	XCorr F6	# Missed Cleavages	B5: Area	C5: Area	D5: Area	E5: Area	F5: Area	D6	E6	F6
	AAFGGSGGR	12	1	1	CON_00021304.1		779.379	2.68301e+09	0	0.01741	High	2.18784	2.31865	2.15633	High	1.9301	High	2.00693	1.97669	0	2036262962	84538419	3.74003e+06	4.3174e+07	9.74832e+06	High	High	High
	GGSSSGGGYGSGGGGSSSVK	18	1	1	CON_00021304.1		1588.68	1921568227	0	0.000559	High	5.27818	5.25715	5.31912	High	5.44988	High	5.31206	5.64845	0	8.88274e+08	1.45888e+09	594031406	1.06634e+09	6.23877e+08	High	High	High
	KKYEDEINK	6	13	6	CON_IPI00290857.2;CON_00021304.1;CON_00622240.4;XBXL10_1g10877;XBXL10_1g10870;XBXL10_1g10871		1166.61	1.01709e+08	0	0.0007587	High	3.75651	3.14547	2.61658	High	2.3219	High	2.42239	2.24733	2	5.70149e+07	8.96492e+07	3.29458e+07	4.33166e+07	3.82106e+07	High	High	High
	YEDEINKR	24	40	19	CON_IPI00290857.2;CON_00300725.7;CON_IPI00554648.3;CON_00009867.3;CON_00299145.9;CON_00220327.3;CON_00021304.1;CON_00293665.7;CON_00697851.1;CON_00221797.1;CON_00462140.1;CON_00622240.4;CON_IPI00376379.3;XBXL10_1g8295;XBXL10_1g8289;XBXL10_1g8291;XBXL10_1g10877;XBXL10_1g10870;XBXL10_1g10871		1066.52	6456119504	0	0.008032	High	1.96031	1.94761	1.86407	High	1.85402	High	1.82619	1.92686	1	4.07321e+09	3694448402	4304846388	4.86375e+09	3934580898	High	High	High
	LQGEIAHVKK	16	1	1	CON_00021304.1		1122.66	3.46811e+08	0	0.000977	High	3.49754	2.88351	3.14959	High	2.28049	High	2.95447	3.04418	1	195899928	225293859	7.56833e+07	1.28508e+08	1.33456e+08	High	High	High
	KYEDEINKR	42	14	6	CON_IPI00290857.2;CON_00021304.1;CON_00622240.4;XBXL10_1g10877;XBXL10_1g10870;XBXL10_1g10871		1194.61	8817102704	0	0.02105	High	3.30522	3.34471	3.37958	High	3.33172	High	3.41911	3.17416	2	6.6859e+09	6.52491e+09	5.11005e+09	7.16632e+09	5.6767e+09	High	High	High
	KYEDEINK	12	14	6	CON_IPI00290857.2;CON_00021304.1;CON_00622240.4;XBXL10_1g10877;XBXL10_1g10870;XBXL10_1g10871		1038.51	2.42849e+09	0	0.0007574	High	3.09885	2.70109	2.76645	High	2.53451	High	2.77319	2.76411	1	1330350488	1.68288e+09	9.31537e+08	1.1934e+09	1.06234e+09	High	High	High
	GGSISGGGYGSGGGK	42	1	1	CON_00021304.1		1197.55	4.62103e+09	0	2.929e-05	High	2.69771	2.65726	2.88615	High	2.59495	High	2.61544	2.64112	0	2.92475e+09	3.79713e+09	2.37403e+09	3.41313e+09	2.13335e+09	High	High	High
	YEDEINK	32	43	20	CON_IPI00290857.2;CON_00300725.7;CON_IPI00554648.3;CON_00009867.3;CON_00299145.9;XBXL10_1g8291;CON_00220327.3;CON_00021304.1;CON_00293665.7;CON_00697851.1;CON_00221797.1;CON_00462140.1;CON_00622240.4;CON_IPI00376379.3;CON_IPI00241841.9;XBXL10_1g8295;XBXL10_1g8289;XBXL10_1g10877;XBXL10_1g10870;XBXL10_1g10871		910.416	15922380192	0	0.01896	High	2.1327	2.12545	1.91357	High	1.77495	High	1.92556	1.81321	0	8.65848e+09	11362991318	9786637980	9.7915e+09	9.50114e+09	High	High	High
	GSSSGGGYSSGSSSYGSGGR	24	1	1	CON_00021304.1		1740.71	4008525630	0	7.935e-08	High	4.95733	5.05866	4.90352	High	4.60186	High	4.61192	4.73875	0	1.75232e+09	2.89274e+09	1.31614e+09	2.18375e+09	1618309566	High	High	High
	KLLEGEECR	19	27	11	CON_00300725.7;CON_00009867.3;CON_00299145.9;CON_IPI00174775.2;CON_00021304.1;CON_00293665.7;CON_00697851.1;CON_00221797.1;CON_00622240.4;XBXL10_1g10877;XBXL10_1g8289	C8(Carbamidomethyl)	1133.56	1.51246e+08	0	0.01377	High	2.70506	2.74776	2.88956	High	2.74487	High	2.70547	2.45344	1	1.94911e+08	197230801	1.65718e+08	2.6809e+08	1.23714e+08	High	High	High
	SKEEAEALYHSK	28	1	1	CON_00021304.1		1391.68	5.26931e+09	0	2.117e-06	High	4.1101	4.23449	3.8317	High	4.2128	High	3.83947	4.01836	1	2887790077	3052550717	1.99712e+09	3538019297	2802923077	High	High	High
	GGSGGGGSISGGGYGSGGGSGGR	83	1	1	CON_00021304.1		1741.75	1.64819e+09	0	1.002e-09	High	5.59043	5.71708	5.27743	High	4.82376	High	5.32055	5.34298	0	6.1821e+08	1.21366e+09	621361818	9.9998e+08	770089748	High	High	High
	LQGEIAHVK	13	1	1	CON_00021304.1		994.567	1.46004e+09	0	0.07266	High	2.11952	2.35589	2.42316	High	2.54058	High	2.20887	2.33197	0	8.75508e+08	852923331	469200191	755934702	727296298	High	High	High
	EEAEALYHSK	23	1	1	CON_00021304.1		1176.55	1149611238	0	0.0001423	High	2.77688	2.16138	2.21734	High	2.35017	High	2.27281	2.37149	0	5.20277e+08	827355350	997835254	1228128148	1073897434	High	High	High
	LLEGEECR	21	28	12	CON_00300725.7;CON_00009867.3;CON_00299145.9;CON_IPI00174775.2;CON_00166205.2;CON_00021304.1;CON_00293665.7;CON_00697851.1;CON_00221797.1;CON_00622240.4;XBXL10_1g10877;XBXL10_1g8289	C7(Carbamidomethyl)	1005.47	5.60345e+09	0	0.02935	High	2.10841	2.09917	2.11088	High	2.11073	High	2.11532	2.10963	0	5.59857e+09	5.17908e+09	3.26645e+09	4.908e+09	2.35489e+09	High	High	High
	KDVDNAYMIK	12	1	1	CON_00021304.1	M8(Oxidation)	1212.59	3.77727e+07	0	6.394e-05	High	3.04973	3.07287	2.80928	High	2.70925	High	2.94608	2.52916	1	3.11324e+07	3.28753e+07	2.74436e+07	30971468	2.76382e+07	High	High	High
	GFSSGSAVVSGGSRR	19	2	2	CON_00021304.1;CON_00622240.4		1410.71	2234461700	0	0.04832	High	3.04794	2.87613	3.68222	High	3.16595	High	3.48301	3.17411	1	1.29802e+09	1590918225	8.5732e+08	1.43176e+09	1.1997e+09	High	High	High
	RSTSSFSCLSR	24	1	1	CON_00021304.1	C8(Carbamidomethyl)	1287.61	740039408	0	0.0002023	High	3.76	4.02275	4.07673	High	3.84639	High	3.65658	3.57406	1	928140406	828176410	632832326	1150621162	445493317	High	High	High
	HGGGGGGFGGGGFGSR	32	1	1	CON_00021304.1		1320.58	5109608391	0	0.0006544	High	5.14694	4.96149	5.10502	High	6.44778	High	5.28961	5.01097	0	3.26566e+09	3952586924	2440343152	4242551522	2870216336	High	High	High
	AAFGGSGGRGSSSGGGYSSGSSSYGSGGR	9	1	1	CON_00021304.1		2501.07	161155696	0	1.43e-09	High	2.00102	2.43455	2.49813	High	2.00918	High	2.07925	0.723108	1	186595632	313699280	333446729	454745124	47171085	High	High	High
	AQYEEIAQR	22	10	5	CON_00300725.7;CON_00299145.9;CON_IPI00290078.5;CON_00021304.1;CON_00293665.7		1107.55	14354552984	0	0.002673	High	2.38185	2.37576	2.69249	High	2.4495	High	2.51956	2.42976	0	4508550546	6359279454	4312585018	6194303654	4863225296	High	High	High
	VDPEIQNVK	24	3	2	CON_00021304.1;CON_00622240.4		1041.56	7187634792	0	0.05699	High	2.1287	2.31401	2.17732	High	2.32595	High	2.32989	2.25541	0	5023066816	4888600760	3561967396	6886912168	4155503136	High	High	High
	GFSSGSAVVSGGSR	17	2	2	CON_00021304.1;CON_00622240.4		1254.61	5258625530	0	0.0003079	High	3.1757	3.94265	3.08079	High	4.0485	High	3.16639	3.25963	0	2467688696	2593866360	1.85208e+09	4.13316e+09	2.88217e+09	High	High	High
	RTAAENDFVTLKK	14	1	1	CON_00021304.1		1492.81	3748610640	0	0.0002127	High	4.88898	4.65152	4.77179	High	4.29759	High	4.61028	3.99169	2	1787924754	2999763600	1281069384	1206205909	1583564168	High	High	High
	STSSFSCLSR	15	1	1	CON_00021304.1	C7(Carbamidomethyl)	1131.51	3958372258	0	0.0002076	High	2.28394	2.30869	2.38218	High	2.30817	High	2.36192	2.36232	0	4062734462	3815355296	2594246561	4739426738	2017025215	High	High	High
	DVDNAYMIK	16	1	1	CON_00021304.1	M7(Oxidation)	1084.5	3086437705	0	0.007059	High	2.26359	2.30887	2.08834	High	2.24063	High	2.23721	2.18983	0	1975874464	2148897156	1486951299	1.87972e+09	1770838809	High	High	High
	SLVGLGGTK	10	1	1	CON_00021304.1		831.494	9889754794	0	0.05986	High	1.86334	2.18332	1.87405	High	2.28086	High	1.87984	2.19317	0	7350036227	8089639631	5.03008e+09	8452795717	5273018715	High	High	High
	TAAENDFVTLKK	52	1	1	CON_00021304.1		1336.71	4285261272	0	0.03151	High	4.19456	4.14125	4.20381	High	4.59071	High	4.1962	4.07378	1	3601683536	4.33197e+09	2648942160	3366148392	3293069832	High	High	High
	DYQELMNVK	5	5	3	CON_IPI00290857.2;CON_00021304.1;CON_IPI00241841.9	M6(Oxidation)	1155.54	0	0	0.01393	High	1.81661	1.9335		High	1.86824		1.92287		0	8.02178e+07	0	62120528	0	0	High	High
	GRGGGGGGFRGFSSGSAVVSGGSR	11	1	1	CON_00021304.1		2113.03	94423248	0	0.002684	High	5.03938	4.48363	4.18302	High	4.13165	High	4.77569	4.36625	2	7.92592e+07	143587470	7.99334e+07	9.41145e+07	41014406	High	High	High
	GGGGGGFRGFSSGSAVVSGGSRR	26	1	1	CON_00021304.1		2056.01	3.23018e+08	0	0.09384	High	5.45139	5.74941	5.61989	High	5.62429	High	5.79078	4.79874	2	329664615	590728150	400843556	255866029	256128938	High	High	High
	RYLDGLTAER	26	1	1	CON_00021304.1		1193.63	5432550618	0	0.0004747	High	3.65286	3.67247	3.53711	High	3.45537	High	3.59404	3.41642	1	3450614118	3938389337	1.94599e+09	2485543474	2833416896	High	High	High
	RTAAENDFVTLK	21	1	1	CON_00021304.1		1364.72	1431537020	0	0.0002099	High	3.67656	3.40809	3.18446	High	3.24845	High	3.32204	3.64969	1	645172106	1200450852	582295558	887476024	696484606	High	High	High
	DVDNAYMIK	14	1	1	CON_00021304.1		1068.5	799156488	0	0.003484	High	1.98716	2.2711	2.25225	High	2.01483	High	2.08608	2.09762	0	315837542	283684004	1.05997e+08	6.57618e+07	1.52528e+08	High	High	High
	IEISELNR	36	2	2	CON_00220327.3;CON_00021304.1		973.531	79436338064	0	0.004635	High	2.41181	2.15434	2.30622	High	2.35603	High	2.32878	2.25262	0	5.23005e+10	53689472055	33578169942	4.39315e+10	47501407438	High	High	High
	TSQNSELNNMQDLVEDYKK	31	1	1	CON_00021304.1	M10(Oxidation)	2272.04	1590878560	0	0.0004145	High	5.6764	5.41248	5.58694	High	5.95443	High	5.81406	5.7971	1	1358380735	1572620793	1138579928	1.27181e+09	1202907807	High	High	High
	YLDGLTAER	19	1	1	CON_00021304.1		1037.53	9195521394	0	0.001251	High	2.18189	1.93318	1.94298	High	1.91746	High	1.92985	2.34783	0	6433670196	7817096890	4373452964	6682618178	5366671144	High	High	High
	FLEQQNQVLQTK	38	8	4	CON_00220327.3;CON_00021304.1;CON_00462140.1;CON_IPI00376379.3		1475.79	35664585784	0	0.0001907	High	3.7281	3.49339	2.78113	High	3.4497	High	3.68068	3.58407	0	17363731168	12397999784	17895379412	23936173390	2.11723e+10	High	High	High
	GGGGGGFRGFSSGSAVVSGGSR	13	1	1	CON_00021304.1		1899.91	231773760	0	1.909e-06	High	7.51512	7.39558	6.67317	High	6.2531	High	6.2395	6.1029	1	336218874	571216219	293407344	387182705	257751418	High	High	High
	FASFIDK	17	52	24	CON_IPI00290857.2;CON_00300725.7;CON_IPI00554648.3;CON_IPI00306959.10;CON_00009867.3;CON_00299145.9;CON_IPI00174775.2;XBXL10_1g8291;CON_105456;CON_IPI00290078.5;CON_00021304.1;CON_00293665.7;CON_00697851.1;CON_00221797.1;CON_00347096.2;CON_00462140.1;CON_00622240.4;CON_IPI00376379.3;CON_IPI00241841.9;CON_00705721.2;XBXL10_1g8295;XBXL10_1g8290;XBXL10_1g10877;XBXL10_1g8289		827.43	20889928652	0	0.01631	High	1.92991	1.93893	1.85944	High	1.86668	High	1.68189	1.85885	0	16666804464	18271764520	10620704572	15494635570	1.1965e+10	High	High	High
	NVQDAIADAEQR	24	1	1	CON_00021304.1		1329.64	2634838877	0	0.03439	High	3.13302	3.54032	3.59924	High	3.70362	High	4.14626	3.92881	0	2126991641	2602091177	3.2137e+09	4921687056	2989543094	High	High	High
	LLRDYQELMNVK	35	4	3	CON_IPI00290857.2;CON_00021304.1;CON_IPI00241841.9	M9(Oxidation)	1537.81	3989037768	0	6.602e-06	High	4.65285	4.31071	4.41015	High	4.3294	High	4.48099	4.54444	1	1656575984	1.67459e+09	805257340	1196642715	2458973840	High	High	High
	YEELQVTVGR	155	1	1	CON_00021304.1		1193.62	8477462560	0	0.0007437	High	2.7116	3.01745	2.95861	High	2.82121	High	2.69025	2.63006	0	2254583936	3378271436	3179928284	4428116100	3916524064	High	High	High
	VRFLEQQNQVLQTK	65	8	4	CON_00220327.3;CON_00021304.1;CON_00462140.1;CON_IPI00376379.3		1730.95	38231080310	0	9.694e-08	High	5.17839	4.58118	5.08171	High	4.38237	High	4.52011	4.72282	1	19912104751	17402363472	22748964341	20471451163	25654725374	High	High	High
	TAAENDFVTLK	25	1	1	CON_00021304.1		1208.62	6712933556	0	0.02035	High	2.96209	2.72262	2.51672	High	2.50657	High	2.53409	3.04697	0	4577112174	4.73481e+09	4012929849	7026905691	4.55938e+09	High	High	High
	TSQNSELNNMQDLVEDYK	27	1	1	CON_00021304.1	M10(Oxidation)	2143.95	5.73829e+08	0	0.0025	High	5.52205	4.97473	5.52754	High	5.43441	High	5.54127	5.55722	0	273072041	3.00631e+08	269508028	3.39291e+08	312772824	High	High	High
	DYQELMNVK	2	5	3	CON_IPI00290857.2;CON_00021304.1;CON_IPI00241841.9		1139.54	132407220	0	0.01085	High	1.76039							1.61673	0	0	0	0	0	15415408			High
	SKEEAEALYHSKYEELQVTVGR	12	1	1	CON_00021304.1		2566.28	321167883	0	8.207e-10	High	8.82213	9.74988	9.73425	High	3.8604	High	5.94503		2	1.15188e+09	1399906432	2.46473e+07	92381168	0	High	High
	EIKIEISELNR	27	1	1	CON_00021304.1		1343.75	1.08112e+09	0	0.0001572	High	3.56033	3.33801	3.42421	High	2.72662	High	3.24656	3.07975	1	8.5958e+08	972974412	1.96158e+08	252833933	314835570	High	High	High
	LALDVEIATYRK	187	19	10	CON_IPI00290857.2;CON_00300725.7;CON_00009867.3;CON_00299145.9;CON_00021304.1;CON_00293665.7;CON_00697851.1;CON_00221797.1;CON_IPI00241841.9;XBXL10_1g8291		1391.79	7597148856	0	0.001571	High	3.94584	3.84747	3.93288	High	3.94186	High	3.85479	3.99987	1	10426772410	1.11043e+10	5.15464e+09	5.4941e+09	2.00012e+09	High	High	High
	LLRDYQELMNVK	17	4	3	CON_IPI00290857.2;CON_00021304.1;CON_IPI00241841.9		1521.81	2977459032	0	1.222e-06	High	4.33168	4.24955	4.14374	High	3.84332	High	3.84552	3.99919	1	8.59941e+08	1157149710	3.15926e+08	376860695	514086193	High	High	High
	MSGDLSSNVTVSVTSSTISSNVASK	25	1	1	CON_00021304.1	M1(Oxidation)	2474.19	26484103	0	0.0005491	High	5.14123	4.1918	5.82534	High	5.75571	High	5.82137	5.90631	0	5.79254e+07	199717943	243398156	19969510	0	High	High	High
	IEISELNRVIQR	14	2	2	CON_00220327.3;CON_00021304.1		1469.84	427816796	0	0.001526	High	2.8684	2.66824	2.84815	High	2.43307	High	2.36419	2.50839	1	9657689170	13638039302	6521624126	5157907158	835106151	High	High	High
	NVQDAIADAEQRGEHALK	32	1	1	CON_00021304.1		1964.98	12568654431	0	1.452e-05	High	5.97158	5.77635	5.17891	High	5.63411	High	5.94811	5.74211	1	8398703902	7778817422	3.42371e+09	5305536747	5.15987e+09	High	High	High
	LNDLEEALQQAK	25	1	1	CON_00021304.1		1371.71	15230448098	0	0.005605	High	3.28748	3.66056	3.04636	High	3.65161	High	3.35178	3.67843	0	8791210746	9878413946	4781288680	7.27656e+09	7626688739	High	High	High
	TSQNSELNNMQDLVEDYKK	9	1	1	CON_00021304.1		2256.05	397883440	0	2.598e-11	High	5.00532	6.29019	5.76126	High	5.82984	High	5.36332	5.81386	1	848905728	1180333616	439574144	508407004	439739090	High	High	High
	NKLNDLEEALQQAK	14	1	1	CON_00021304.1		1613.85	2189741736	0	0.004337	High	4.99113	5.05695	5.15641	High	4.92208	High	5.3685	5.15711	1	1555542384	1482565724	870304576	899952376	1229252044	High	High	High
	LALDVEIATYR	54	25	10	CON_IPI00290857.2;CON_00300725.7;CON_00009867.3;CON_00299145.9;CON_00021304.1;CON_00293665.7;CON_00697851.1;CON_00221797.1;CON_IPI00241841.9;XBXL10_1g8291		1263.69	790710142	0	0.004243	High	2.71855	2.46588	2.97101	High	2.82559	High	2.99738	2.61927	0	862913883	1289158834	604167874	741664298	61439000	High	High	High
	SISISVAGGGGGFGAAGGFGGR	271	1	1	CON_00021304.1		1838.92	176783268	0	0.0002523	High	4.81658	5.31726	5.21924	High	5.35916	High	5.31348	5.05012	0	163068077	205201132	3.12236e+07	1.66534e+08	57049156	High	High	High
	TSQNSELNNMQDLVEDYK	10	1	1	CON_00021304.1		2127.95	3.58198e+08	0	2.686e-07	High	4.82965	4.2405	4.29408	High	4.15834	High	4.45362	3.95891	0	65531656	1.01235e+08	42541157	7.1439e+07	44426535	High	High	High
	GGGFGGGSGFGGGSGFGGGSGFSGGGFGGGGFGGGR	59	1	1	CON_00021304.1		2831.2	2071053488	0	2.919e-09	High	9.07477	7.95761	8.10341	High	8.09745	High	8.53516	8.24238	0	1519111313	1914392320	822310424	1470190872	1004826152	High	High	High
	VLYDAEISQIHQSVTDTNVILSMDNSR	32	1	1	CON_00021304.1	M23(Oxidation)	3064.49	5749830781	0	1.801e-14	High	8.7832	7.53264	7.84859	High	8.33597	High	7.96784	8.56942	0	5050567302	5826039310	4399395164	4491423725	3833747941	High	High	High
	VLYDAEISQIHQSVTDTNVILSMDNSR	28	1	1	CON_00021304.1		3048.49	1.33398e+09	0	3.235e-13	High	7.73376	7.18712	8.18283	High	6.81679	High	7.06851	6.83296	0	1276243877	1.64966e+09	9.77248e+08	1074027797	527087765	High	High	High
	VELQSKVDLLNQEIEFLK	15	1	1	CON_00021304.1		2145.18	2.04452e+08	0	8.07e-11	High	5.61219	6.64768	6.63703	High	2.74823	High	4.01265		1	854003578	1.02279e+09	2.75588e+07	5.48902e+07	0	High	High
	VDLLNQEIEFLK	39	1	1	CON_00021304.1		1460.8	28009662320	0	1.737e-06	High	3.34728	3.31918	3.24683	High	3.31932	High	3.29587	3.35383	0	16140207461	17279222876	1.17774e+10	1.72537e+10	1.30666e+10	High	High	High
	NLDLDSIIAEVK	56	12	6	CON_00300725.7;CON_00009867.3;CON_00299145.9;CON_00021304.1;CON_00293665.7;CON_IPI00241841.9		1329.73	2.43282e+10	0	8.066e-05	High	3.6254	3.80636	3.56252	High	3.37938	High	3.49304	3.63853	0	18561122123	18008597792	12312209872	17810070764	13152456286	High	High	High
	FGGFGGPGGVGGLGGPGGFGPGGYPGGIHEVSVNQSLLQPLNVK	26	1	1	CON_00021304.1		4092.09	1732800670	0	1.353e-09	High	9.48508	8.95897	8.73699	High	9.05429	High	8.90138	9.05306	0	7243153122	6.52905e+09	7.30269e+09	9.81321e+09	721136149	High	High	High
	WELLQQMNVGTRPINLEPIFQGYIDSLK	17	1	1	CON_00021304.1	M7(Oxidation)	3318.72	2.79687e+08	0	2.039e-13	High	6.87166	6.03423	6.5492	High	6.67985	High	6.80095	4.22214	0	334239857	2.59522e+08	6.74118e+08	433294625	40003737	High	High	High
	GGSGGGGSISGGGYGSGGGSGGRYGSGGGSK	7	1	1	CON_00021304.1		2435.06	0	0	2.833e-07			6.02101	6.7847	High	3.99709	High	5.01168		1	2.97781e+07	5.05189e+07	8.95592e+07	1.02607e+08	0	High	High
	AQYEEIAQRSK	7	5	2	CON_IPI00290078.5;CON_00021304.1		1322.67	0	0	0.02026			2.57847	2.37739	High	2.08119	High	2.59801		1	1.14751e+08	2.0524e+08	1.11042e+08	0	0	High	High
	VIQRLQGEIAHVKK	8	1	1	CON_00021304.1		1618.97	0	0	0.0004246			3.68924	3.24724	High	3.33318	High	2.78807		2	9.10939e+07	1.00366e+08	5.06492e+07	60031520	0	High	High
	EEAEALYHSKYEELQVTVGR	8	1	1	CON_00021304.1		2351.15	0	0	6.904e-10			6.80022	6.29918	High		High			1	97327925	1.29515e+08	0	0	0
	AQYEEIAQRSKEEAEALYHSK	2	1	1	CON_00021304.1		2480.21	0	0	8.308e-06			2.09881	3.25985	High		High			2	9.65642e+07	110684516	0	0	0
	EIKIEISELNRVIQR	2	1	1	CON_00021304.1		1840.06	0	0	2.614e-05			3.29362	3.67476	High		High			2	1.22385e+08	118470328	0	0	0
	NKLNDLEEALQQAKEDLAR	2	1	1	CON_00021304.1		2198.14	0	0	1.329e-08			6.88753	4.69949	High		High			2	53034914	17834474	0	0	0
	LNDLEEALQQAKEDLAR	2	1	1	CON_00021304.1		1956.01	0	0	7.426e-09			5.75242	5.09078	High		High			1	48622039	3.94366e+07	0	0	0
	FLEQQNQVLQTKWELLQQMNVGTRPINLEPIFQGYIDSLKR	3	1	1	CON_00021304.1	M19(Oxidation)	4931.58	0	0	2.229e-06			5.11322	4.89217	High		High	5.31444		2	0	10679050	0	0	0		High
	FLEQQNQVLQTKWELLQQMNVGTRPINLEPIFQGYIDSLK	8	1	1	CON_00021304.1	M19(Oxidation)	4775.49	0	0	9.154e-14			10.2054	9.6916	High	9.08087	High	8.82736		1	820051344	441349322	3.44044e+08	5.45423e+08	0	High	High
	WELLQQMNVGTRPINLEPIFQGYIDSLK	3	1	1	CON_00021304.1		3302.72	0	0	7.467e-09			4.99689		High	4.18219		3.5987		0	4.39758e+07	0	23971989	2.33868e+07	0	High	High
	HSSGGGSRGGSSSGGGYGSGGGGSSSVK	2	1	1	CON_00021304.1		2314.01	0	0	0.004407				4.70993		5.80403	High			1	0	21144309	2.86452e+07	0	0	High
	YEELQVTVGRHGDSLK	3	1	1	CON_00021304.1		1830.94	0	0	0.0416				3.46222		3.88943	High	3.47232		1	0	0	122108010	0	0	High	High
	NLDLDSIIAEVKAQYEEIAQR	1	6	4	CON_00300725.7;CON_00299145.9;CON_00021304.1;CON_00293665.7		2418.25	0	0	3.829e-06				4.70292			High			1	0	9.25825e+06	0	0	0
	GSSSGGGYSSGSSSYGSGGRQSGSR	1	1	1	CON_00021304.1		2255.95	0	0	0.09705						2.23427				1	0	0	9.21072e+06	0	0	High
	QSGSRGGSGGGGSISGGGYGSGGGSGGR	1	1	1	CON_00021304.1		2256.99	0	0	0.0658						2.69331				1	0	0	1.78356e+07	0	0	High
	EDLARLLRDYQELMNVK	3	1	1	CON_00021304.1	M14(Oxidation)	2122.1	0	0	0.09129						3.09167		3.08761		2	0	0	0	1.98434e+07	0	High	High
	IEISELNRVIQRLQGEIAHVK	2	1	1	CON_00021304.1		2445.39	0	0	0.0477						2.99351		2.9601		2	0	0	209442890	284404634	0	High	High
	WELLQQMNVGTRPINLEPIFQGYIDSLKR	4	1	1	CON_00021304.1	M7(Oxidation)	3474.82	0	0	2.519e-05						6.7243		6.21914		1	0	0	458549295	320884228	0	High	High
	AAFGGSGGRGSSSGGGYSSGSSSYGSGGRQSGSR	2	1	1	CON_00021304.1		3016.31	0	0.001	0.1492						3.32008		2.0618		2	0	0	3.24344e+07	1.34732e+07	0	High	High
CON_00009867.3	SWISS-PROT:P13647 Tax_Id=9606 Gene_Symbol=KRT5 Keratin, type II cytoskeletal 5	68.64	6	16	71	1321	2.03802e+10	15218232999	1.58811e+10	1.09065e+10	1.43654e+10	1.15395e+10	602.117	65.76	62	223	613.625	60.68	62	229	735.07	542.172	542.867	426.797	64.24	60.34	59.49	55.76	63	62	59	55	281	213	212	163	590	62.34	7.73779
	Sequence	# PSMs	# Proteins	# Protein Groups	Protein Group Accessions	Modifications	MH+ [Da]	A5: Area	q-Value	PEP	A6	XCorr A6	XCorr B6	XCorr C6	B6	XCorr D6	C6	XCorr E6	XCorr F6	# Missed Cleavages	B5: Area	C5: Area	D5: Area	E5: Area	F5: Area	D6	E6	F6
	NTKHEISEMNR	2	3	2	CON_00009867.3;CON_00697851.1	M9(Oxidation)	1374.64	1.07732e+07	0	2.801e-05	High	2.81512	2.61974		High					1	1.48475e+07	0	0	0	0
	VRTEEREQIK	4	10	4	CON_00009867.3;CON_IPI00290078.5;CON_00697851.1;XBXL10_1g8289		1287.7	1.11258e+09	0	0.0009758	High	2.63507	2.72889		High					2	912494684	0	0	0	0
	SGGGGGGGFGR	6	2	2	CON_00009867.3;CON_00697851.1		865.391	2.48808e+08	0	0.0004374	High	3.17118	3.17495		High			2.15832		0	381838664	0	0	7.73816e+06	0		High
	AEIDNVKK	2	2	1	CON_00009867.3		916.51	1.23421e+07	0	0.01578	High	1.27783	1.3059		High					1	1.54844e+07	0	0	0	0
	DVDAAYMNK	17	17	9	CON_00300725.7;CON_00009867.3;CON_00299145.9;CON_00293665.7;CON_00697851.1;CON_00347096.2;XBXL10_1g8295;XBXL10_1g10877;XBXL10_1g8289	M7(Oxidation)	1042.45	4.54973e+08	0	0.01374	High	2.28545	2.07945	1.8674	High	1.86932	High	1.87188	1.84209	0	436285162	489644663	4.8687e+08	382987610	2.59906e+08	High	High	High
	NKYEDEINKR	50	20	11	CON_00300725.7;CON_IPI00554648.3;CON_00009867.3;CON_00299145.9;CON_00220327.3;CON_00293665.7;CON_00697851.1;CON_00462140.1;XBXL10_1g8295;XBXL10_1g8289;XBXL10_1g8291		1308.65	8020872852	0	0.01025	High	3.70003	3.46323	3.76139	High	3.93702	High	3.90545	3.5984	2	4453363553	4.38948e+09	3.29655e+09	4871622639	4.18404e+09	High	High	High
	FVSTTSSSR	5	4	2	CON_00009867.3;CON_00697851.1		971.478	2.97898e+07	0	0.0002947	High	1.70534		1.80804		1.4416	High	1.56592	1.76348	0	0	48382153	1.49555e+07	3.98281e+07	1.38183e+07	High	High	High
	HEISEMNR	6	3	2	CON_00009867.3;CON_00697851.1		1015.46	89333981	0	0.03735	High	2.2504	2.24961	2.17183	High	2.05853	High	1.89131	2.43327	0	5.63162e+07	4.52659e+07	9.1464e+06	5.33053e+06	2.13643e+07	High	High	High
	YEDEINKR	24	40	19	CON_IPI00290857.2;CON_00300725.7;CON_IPI00554648.3;CON_00009867.3;CON_00299145.9;CON_00220327.3;CON_00021304.1;CON_00293665.7;CON_00697851.1;CON_00221797.1;CON_00462140.1;CON_00622240.4;CON_IPI00376379.3;XBXL10_1g8295;XBXL10_1g8289;XBXL10_1g8291;XBXL10_1g10877;XBXL10_1g10870;XBXL10_1g10871		1066.52	6456119504	0	0.008032	High	1.96031	1.94761	1.86407	High	1.85402	High	1.82619	1.92686	1	4.07321e+09	3694448402	4304846388	4.86375e+09	3934580898	High	High	High
	FLEQQNK	21	50	20	CON_IPI00290857.2;CON_107456;CON_00300725.7;CON_IPI00554648.3;CON_IPI00306959.10;CON_00009867.3;CON_00299145.9;CON_106456;CON_105456;CON_00166205.2;CON_00293665.7;CON_00697851.1;CON_00124800.2;CON_00221797.1;CON_IPI00241841.9;XBXL10_1g8290;XBXL10_1g8291;XBXL10_1g10877;XBXL10_1g10870;XBXL10_1g10871		906.468	2.22081e+09	0	0.1134	High	1.69707	1.73364	1.60086	High	1.57643	High	1.55466	1.64136	0	1627774338	1836262672	1.19747e+09	1.94041e+09	1.03942e+09	High	High	High
	YEDEINK	32	43	20	CON_IPI00290857.2;CON_00300725.7;CON_IPI00554648.3;CON_00009867.3;CON_00299145.9;XBXL10_1g8291;CON_00220327.3;CON_00021304.1;CON_00293665.7;CON_00697851.1;CON_00221797.1;CON_00462140.1;CON_00622240.4;CON_IPI00376379.3;CON_IPI00241841.9;XBXL10_1g8295;XBXL10_1g8289;XBXL10_1g10877;XBXL10_1g10870;XBXL10_1g10871		910.416	15922380192	0	0.01896	High	2.1327	2.12545	1.91357	High	1.77495	High	1.92556	1.81321	0	8.65848e+09	11362991318	9786637980	9.7915e+09	9.50114e+09	High	High	High
	LRAEIDNVKK	13	2	1	CON_00009867.3		1185.69	9.05069e+08	0	0.06811	High	4.06289	3.7335	3.60744	High	4.32651	High	3.79662	3.74277	2	7.30796e+08	792710637	3.95981e+08	389907834	4.96401e+08	High	High	High
	KLLEGEECR	19	27	11	CON_00300725.7;CON_00009867.3;CON_00299145.9;CON_IPI00174775.2;CON_00021304.1;CON_00293665.7;CON_00697851.1;CON_00221797.1;CON_00622240.4;XBXL10_1g10877;XBXL10_1g8289	C8(Carbamidomethyl)	1133.56	1.51246e+08	0	0.01377	High	2.70506	2.74776	2.88956	High	2.74487	High	2.70547	2.45344	1	1.94911e+08	197230801	1.65718e+08	2.6809e+08	1.23714e+08	High	High	High
	NKYEDEINK	25	23	12	CON_00300725.7;CON_IPI00554648.3;CON_00009867.3;CON_00299145.9;XBXL10_1g8291;CON_00220327.3;CON_00293665.7;CON_00697851.1;CON_00462140.1;CON_IPI00241841.9;XBXL10_1g8295;XBXL10_1g8289		1152.55	3188012410	0	0.08708	High	3.33727	3.50497	3.04553	High	3.26906	High	3.60094	3.18381	1	1.64644e+09	1.84262e+09	1.13915e+09	1.44402e+09	1.59798e+09	High	High	High
	QSSVSFR	12	2	1	CON_00009867.3		810.411	3.06972e+08	0	0.08161	High	2.07409	2.07973	1.90813	High	2.08301	High	2.03293	2.03627	0	171924994	4.17262e+08	135701541	161161277	106053195	High	High	High
	LLEGEECR	21	28	12	CON_00300725.7;CON_00009867.3;CON_00299145.9;CON_IPI00174775.2;CON_00166205.2;CON_00021304.1;CON_00293665.7;CON_00697851.1;CON_00221797.1;CON_00622240.4;XBXL10_1g10877;XBXL10_1g8289	C7(Carbamidomethyl)	1005.47	5.60345e+09	0	0.02935	High	2.10841	2.09917	2.11088	High	2.11073	High	2.11532	2.10963	0	5.59857e+09	5.17908e+09	3.26645e+09	4.908e+09	2.35489e+09	High	High	High
	EYQELMNTK	15	3	2	CON_00009867.3;CON_00697851.1	M6(Oxidation)	1171.53	122068978	0	0.0006147	High	2.04342	1.92278	1.63273	High	1.80448	High	1.81523	1.85321	0	7.31669e+07	8.40388e+07	7.01577e+07	8.24561e+07	5.99636e+07	High	High	High
	LRAEIDNVK	8	2	1	CON_00009867.3		1057.6	793309703	0	0.01729	High	2.60571	2.73444	2.62269	High	2.50578	High	2.41246	2.47847	1	0	5.84236e+08	3.41564e+08	4.09654e+08	4.43049e+08	High	High	High
	TSFTSVSR	8	2	2	CON_00009867.3;CON_00697851.1		884.447	6.53524e+08	0	0.005997	High	2.29585	2.04798	1.87281	High	1.81416	High	1.89599		0	4.22596e+08	7.03468e+08	3.13194e+08	414327667	0	High	High
	YEELQQTAGR	16	3	2	CON_00009867.3;CON_00697851.1		1194.58	3.35109e+09	0	5.534e-05	High	2.48386	2.53631	2.60707	High	2.52741	High	2.4315	2.45322	0	2.76133e+09	2914674639	2.02161e+09	2754052558	2080594471	High	High	High
	VRFLEQQNK	22	50	20	CON_IPI00290857.2;CON_107456;CON_00300725.7;CON_IPI00554648.3;CON_IPI00306959.10;CON_00009867.3;CON_00299145.9;CON_106456;CON_105456;CON_00166205.2;CON_00293665.7;CON_00697851.1;CON_00124800.2;CON_00221797.1;CON_IPI00241841.9;XBXL10_1g8290;XBXL10_1g8291;XBXL10_1g10877;XBXL10_1g10870;XBXL10_1g10871		1161.64	4228717839	0	0.01767	High	2.65454	2.71945	2.56823	High	2.672	High	2.65601	2.5828	1	3.39655e+09	4087371328	2.19974e+09	2.78177e+09	1985595236	High	High	High
	AQYEEIANR	13	2	1	CON_00009867.3		1093.53	4184826432	0	0.005664	High	2.35559	2.00039	2.39198	High	2.12955	High	2.00467	1.97831	0	3203102730	3358781086	2219228144	3077658746	2446115424	High	High	High
	SLYNLGGSKR	13	2	2	CON_00009867.3;CON_00697851.1		1094.6	226196128	0	0.008749	High	2.3453	2.17645	2.3205	High	2.08736	High	2.14386	2.16281	1	226642102	4.00501e+08	191201024	186074235	170706425	High	High	High
	QLDSIVGERGR	12	4	4	CON_00300725.7;CON_00009867.3;CON_00299145.9;CON_00293665.7		1229.66	50474002	0	0.009546	High	2.47594	2.57251	2.74395	High	2.63204	High	2.55666	2.61873	1	1.61317e+08	2.85444e+08	1.13658e+08	9.19135e+07	3.18132e+07	High	High	High
	SRTEAESWYQTK	24	3	2	CON_00009867.3;CON_00697851.1		1485.7	1563605896	0	0.1057	High	3.82751	3.85121	3.48627	High	3.76182	High	4.06399	3.80249	1	1235793151	1.41509e+09	1114670974	9.55624e+08	1123849692	High	High	High
	RQLDSIVGER	8	4	4	CON_00300725.7;CON_00009867.3;CON_00299145.9;CON_00293665.7		1172.64	4.13626e+08	0	0.0009457	High	3.20251	2.76972	3.2138	High	3.19693	High	2.50241	2.3316	1	108014621	4.55142e+08	309527710	64376707	24505247	High	High	High
	RTTAENEFVMLKK	12	3	2	CON_00009867.3;CON_00697851.1	M10(Oxidation)	1582.83	8.68035e+08	0	0.1233	High	5.19383	5.16039	4.85273	High	5.25048	High	3.83508	5.35799	2	4.60784e+08	5.74577e+08	3.19617e+08	2.03171e+08	294696740	High	High	High
	EYQELMNTK	1	3	2	CON_00009867.3;CON_00697851.1		1155.53	76044337	0	0.0003416	High	1.8536								0	0	0	0	0	0
	SLYNLGGSK	23	2	2	CON_00009867.3;CON_00697851.1		938.494	234146577	0	0.05681	High	1.64118	1.88457	1.82977	High	1.62814	High	2.11074	1.72156	0	137259956	214482504	193857620	145787492	0	High	High	High
	TEAESWYQTK	18	3	2	CON_00009867.3;CON_00697851.1		1242.56	952773458	0	0.0001732	High	3.054	3.03973	2.46625	High	2.79348	High	2.87335	3.00467	0	749887444	1095755544	467703820	1070984034	475082707	High	High	High
	QLDSIVGER	15	4	4	CON_00300725.7;CON_00009867.3;CON_00299145.9;CON_00293665.7		1016.54	7233350512	0	0.002646	High	2.36609	2.59254	2.31692	High	2.01726	High	2.41799	2.25865	0	5.0764e+09	5323248659	3370625136	4317476798	3605219395	High	High	High
	NMQDLVEDFK	18	4	3	CON_00009867.3;CON_00697851.1;XBXL10_1g8295		1238.57	1001515408	0	0.03755	High	2.10005	2.15572	2.28028	High	2.53518	High	2.15592	2.40442	0	2.91896e+08	249506646	112400502	69246822	146201068	High	High	High
	RTTAENEFVMLKK	1	3	2	CON_00009867.3;CON_00697851.1		1566.83	0	0	0.002453	High	3.13484								2	0	0	0	0	0
	TTAENEFVMLKK	21	3	2	CON_00009867.3;CON_00697851.1	M9(Oxidation)	1426.72	852501330	0	0.002895	High	3.7978	3.70915	3.99419	High	3.76182	High	3.57902	3.65215	1	6.1766e+08	521400210	488018035	3.58311e+08	392644858	High	High	High
	LLREYQELMNTK	33	3	2	CON_00009867.3;CON_00697851.1	M9(Oxidation)	1553.8	422416920	0	0.02351	High	4.62471	4.6757	4.69558	High	4.47392	High	4.71251	4.77977	1	482958314	552768984	394212057	321774069	329604072	High	High	High
	RTTAENEFVMLK	15	3	2	CON_00009867.3;CON_00697851.1	M10(Oxidation)	1454.73	471082920	0	0.001564	High	4.24608	4.20376	3.57284	High	3.86205	High	3.6754	3.96731	1	2.06319e+08	249616858	248552781	218957832	2.1888e+08	High	High	High
	GLGVGFGSGGGSSSSVK	11	1	1	CON_00009867.3		1439.71	166476941	0	4.027e-07	High	3.37382	4.57314	3.58123	High	3.37313	High	3.23728	3.44979	0	115115673	321751520	1.30706e+08	168957110	8.61228e+07	High	High	High
	ISISTSGGSFR	18	1	1	CON_00009867.3		1111.57	4322984136	0	0.0008596	High	2.56557	2.55612	2.52398	High	2.53534	High	2.5078	2.52737	0	2.79693e+09	3.4523e+09	1.85026e+09	2660092228	2.23689e+09	High	High	High
	VSLAGACGVGGYGSR	18	1	1	CON_00009867.3	C7(Carbamidomethyl)	1410.68	2086074848	0	4.683e-07	High	3.62891	3.58223	4.43318	High	3.43771	High	3.49846	3.55404	0	1828830709	2.83233e+09	1.25298e+09	2.20862e+09	9.72917e+08	High	High	High
	FASFIDK	17	52	24	CON_IPI00290857.2;CON_00300725.7;CON_IPI00554648.3;CON_IPI00306959.10;CON_00009867.3;CON_00299145.9;CON_IPI00174775.2;XBXL10_1g8291;CON_105456;CON_IPI00290078.5;CON_00021304.1;CON_00293665.7;CON_00697851.1;CON_00221797.1;CON_00347096.2;CON_00462140.1;CON_00622240.4;CON_IPI00376379.3;CON_IPI00241841.9;CON_00705721.2;XBXL10_1g8295;XBXL10_1g8290;XBXL10_1g10877;XBXL10_1g8289		827.43	20889928652	0	0.01631	High	1.92991	1.93893	1.85944	High	1.86668	High	1.68189	1.85885	0	16666804464	18271764520	10620704572	15494635570	1.1965e+10	High	High	High
	SFSTASAITPSVSR	13	2	2	CON_00009867.3;CON_00697851.1		1410.72	0	0	1.118e-05	High	3.73708	2.627	2.82744	High	2.54869	High	3.50224	3.05378	0	159002232	830332208	233250206	277380096	242860568	High	High	High
	KQCANLQNAIADAEQR	11	2	2	CON_00009867.3;CON_00697851.1	C3(Carbamidomethyl)	1829.89	81839640	0	0.001384	High	4.07254	4.36718	3.5776	High	4.59902	High	4.81262	4.08594	1	61947690	83136484	178757803	194302041	92370768	High	High	High
	TTAENEFVMLK	16	3	2	CON_00009867.3;CON_00697851.1	M9(Oxidation)	1298.63	1.16635e+09	0	0.0005171	High	2.64	2.98641	2.52806	High	2.60313	High	2.64905	2.84414	0	8.55156e+08	8.68514e+08	8.98869e+08	9.49764e+08	7.36693e+08	High	High	High
	NMQDLVEDFK	12	4	3	CON_00009867.3;CON_00697851.1;XBXL10_1g8295	M2(Oxidation)	1254.57	596293356	0	0.0009092	High	2.4763	2.108	2.15883	High	2.14614	High	2.2108	2.25548	0	299876727	2.29043e+08	368237404	299824058	348842148	High	High	High
	LAELEEALQK	20	1	1	CON_00009867.3		1143.63	5642919044	0	0.03975	High	3.14607	3.18261	3.16926	High	3.23131	High	3.78758	3.19493	0	4580984512	4301639080	2902126369	2830675818	3157904512	High	High	High
	GRLDSELRNMQDLVEDFK	16	2	2	CON_00009867.3;CON_00697851.1		2165.07	67552481	0	1.309e-05	High	2.17055	3.19472	3.76234	High	2.36972	High	2.54129	2.27523	2	204829278	402446662	70030818	1.67703e+08	38028484	High	High	High
	WTLLQEQGTK	19	5	4	CON_00300725.7;CON_00009867.3;CON_00299145.9;CON_00293665.7		1203.64	4445052518	0	0.01498	High	3.01157	3.03325	2.95757	High	3.24042	High	2.92818	2.9151	0	1718076312	2162713873	1553295237	2206260552	1342408721	High	High	High
	LLREYQELMNTK	14	3	2	CON_00009867.3;CON_00697851.1		1537.8	7.46244e+08	0	7.783e-05	High	4.40466	3.98506	4.12039	High	4.05223	High	3.82057	4.06475	1	313382776	3.74364e+08	1.15056e+08	8.83159e+07	1.232e+08	High	High	High
	QCANLQNAIADAEQR	18	2	2	CON_00009867.3;CON_00697851.1	C2(Carbamidomethyl)	1701.8	421545853	0	2.471e-06	High	4.73922	4.94623	4.65663	High	4.80911	High	4.4885	4.35437	0	3.96021e+08	450003601	451581718	612215058	4.06448e+08	High	High	High
	TTAENEFVMLK	6	3	2	CON_00009867.3;CON_00697851.1		1282.64	167173765	0	0.0001861	High	2.82754	2.62058	2.69397	High	2.05513	High	2.10029	2.20117	0	0	3.00315e+07	20720306	1.55226e+07	0	High	High	High
	VDALMDEINFMK	16	3	2	CON_00009867.3;CON_00697851.1	M5(Oxidation); M11(Oxidation)	1457.67	1081649325	0	9.057e-06	High	3.51502	3.43801	3.39334	High	3.42292	High	3.12219	3.36306	0	814317868	842914886	899916655	6.49229e+08	614752254	High	High	High
	LALDVEIATYRK	187	19	10	CON_IPI00290857.2;CON_00300725.7;CON_00009867.3;CON_00299145.9;CON_00021304.1;CON_00293665.7;CON_00697851.1;CON_00221797.1;CON_IPI00241841.9;XBXL10_1g8291		1391.79	7597148856	0	0.001571	High	3.94584	3.84747	3.93288	High	3.94186	High	3.85479	3.99987	1	10426772410	1.11043e+10	5.15464e+09	5.4941e+09	2.00012e+09	High	High	High
	VLDTKWTLLQEQGTK	23	4	3	CON_00009867.3;CON_00299145.9;CON_00293665.7		1759.96	1375720222	0	1.399e-08	High	5.12866	5.08817	5.17295	High	4.92489	High	4.87401	4.82868	1	2611947685	3444634064	1.21572e+09	1.41943e+09	478851728	High	High	High
	LDSELRNMQDLVEDFK	6	2	2	CON_00009867.3;CON_00697851.1	M8(Oxidation)	1967.94	51496403	0	0.04067	High	3.06516		3.50545		4.66004	High	2.99728	2.89674	1	0	4.44285e+07	8.82875e+07	54401576	41216647	High	High	High
	GRLDSELRNMQDLVEDFK	23	2	2	CON_00009867.3;CON_00697851.1	M10(Oxidation)	2181.06	158566998	0	0.0269	High	3.74151	3.57119	3.74222	High	3.48834	High	3.74771	3.23077	2	2.17218e+08	268002917	194246085	129149201	88898484	High	High	High
	NKLAELEEALQK	11	1	1	CON_00009867.3		1385.76	86399586	0	8.971e-06	High	4.22542	4.60808	4.59541	High	4.16843	High	4.54868	4.67611	1	279648497	135126482	134958260	1.23808e+08	1.29336e+08	High	High	High
	MFFDAELSQMQTHVSDTSVVLSMDNNR	1	3	2	CON_00009867.3;CON_00697851.1	M1(Oxidation); M10(Oxidation); M23(Oxidation)	3150.38	0	0	7.28e-11	High	5.21866								0	0	0	0	0	0
	LALDVEIATYR	54	25	10	CON_IPI00290857.2;CON_00300725.7;CON_00009867.3;CON_00299145.9;CON_00021304.1;CON_00293665.7;CON_00697851.1;CON_00221797.1;CON_IPI00241841.9;XBXL10_1g8291		1263.69	790710142	0	0.004243	High	2.71855	2.46588	2.97101	High	2.82559	High	2.99738	2.61927	0	862913883	1289158834	604167874	741664298	61439000	High	High	High
	KQCANLQNAIADAEQRGELALK	5	2	2	CON_00009867.3;CON_00697851.1	C3(Carbamidomethyl)	2441.25	469044406	0	3.607e-06	High	1.0807		6.87926		5.32015	High		4.82775	2	0	323629492	1.0086e+08	0	140942649	High		High
	QCANLQNAIADAEQRGELALK	17	2	2	CON_00009867.3;CON_00697851.1	C2(Carbamidomethyl)	2313.16	3.85245e+09	0	0.009073	High	7.19594	7.20201	7.00998	High	7.17457	High	7.21631	7.17381	1	2865041509	2570126368	855340080	8.42901e+08	1.08585e+09	High	High	High
	VDALMDEINFMK	6	3	2	CON_00009867.3;CON_00697851.1		1425.68	201282387	0	6.732e-06	High	2.83766	2.86055	2.70164	High	2.62623	High	2.73449	2.75285	0	5.47767e+07	62106074	2.63152e+07	2.23372e+07	10348532	High	High	High
	TVRQNLEPLFEQYINNLRR	32	6	4	CON_00300725.7;CON_00009867.3;CON_00299145.9;CON_00293665.7		2403.29	3.61363e+08	0	1.745e-06	High	4.68463	4.74764	4.95277	High	4.74959	High	4.63683	4.84498	2	2.50674e+09	2.97021e+09	1.40584e+09	1.14716e+09	189524944	High	High	High
	MFFDAELSQMQTHVSDTSVVLSMDNNR	2	3	2	CON_00009867.3;CON_00697851.1	M1(Oxidation)	3118.39	3.80311e+07	0	9.623e-09	High	4.20756		3.24576			High			0	0	0	0	0	0
	NLDLDSIIAEVK	56	12	6	CON_00300725.7;CON_00009867.3;CON_00299145.9;CON_00021304.1;CON_00293665.7;CON_IPI00241841.9		1329.73	2.43282e+10	0	8.066e-05	High	3.6254	3.80636	3.56252	High	3.37938	High	3.49304	3.63853	0	18561122123	18008597792	12312209872	17810070764	13152456286	High	High	High
	QNLEPLFEQYINNLRR	35	6	4	CON_00300725.7;CON_00009867.3;CON_00299145.9;CON_00293665.7		2047.07	1.12678e+10	0	5.019e-07	High	3.78767	3.77555	3.96856	High	3.7642	High	3.68824	3.61107	1	8440353877	8.35546e+09	5405363809	6.6502e+09	3.96181e+09	High	High	High
	TVRQNLEPLFEQYINNLR	12	6	4	CON_00300725.7;CON_00009867.3;CON_00299145.9;CON_00293665.7		2247.19	108496706	0	3.095e-10	High	5.89559	6.52355	6.211	High	6.20957	High	5.11734	4.26018	1	261402776	1.68082e+08	156326393	1.15567e+08	2.96027e+07	High	High	High
	QNLEPLFEQYINNLR	13	6	4	CON_00300725.7;CON_00009867.3;CON_00299145.9;CON_00293665.7		1890.97	5.97673e+08	0	2.055e-07	High	5.22226	5.42338	4.50692	High	4.33635	High	4.54563	4.5208	0	247353959	2.58665e+08	2.54467e+08	391453792	236695307	High	High	High
	AQYEEIANRSR	4	2	1	CON_00009867.3		1336.66	0	0	0.02045			1.52126	1.59978	High	1.65221	High	1.44748		1	3.30296e+07	38905572	3.33115e+07	1.61881e+07	0	High	High
	RISISTSGGSFR	6	1	1	CON_00009867.3		1267.67	0	0	0.1106			2.11982	2.83429	High	3.08379	High	3.10976		1	0	0	0	0	0	High	High
	LDSELRNMQDLVEDFK	6	2	2	CON_00009867.3;CON_00697851.1		1951.94	0	0	7.877e-05			1.45263	3.75055	High	1.75482	High	1.4007		1	0	40855359	30154270	4.63692e+07	0	High	High
	QLDSIVGERGRLDSELR	8	4	4	CON_00300725.7;CON_00009867.3;CON_00299145.9;CON_00293665.7		1943.03	0	0	0.07368			3.23454	2.77146	High	2.834	High	2.6761	1.87122	2	2.00845e+08	363981015	130330700	79639370	9.77852e+06	High	High	High
	VELEAKVDALMDEINFMK	2	2	2	CON_00009867.3;CON_00697851.1	M11(Oxidation); M17(Oxidation)	2127.04	0	0	2.33e-07			5.17994	5.58173	High		High			1	7.69996e+07	7.51019e+07	0	0	0
	HGDDLRNTKHEISEMNR	1	3	2	CON_00009867.3;CON_00697851.1	M15(Oxidation)	2067.96	0	0	0.009446				2.65408			High			2	0	5.57633e+06	0	0	0
	SGGGGGGGFGRVSLAGACGVGGYGSR	1	1	1	CON_00009867.3	C18(Carbamidomethyl)	2257.05	0	0	0.01504						5.27265				1	0	0	0	0	0	High
	DARNKLAELEEALQK	1	1	1	CON_00009867.3		1727.93	0	0	0.006632								3.01532		2	0	0	0	6.06633e+07	0		High
	DVDAAYMNK	5	17	9	CON_00300725.7;CON_00009867.3;CON_00299145.9;CON_00293665.7;CON_00697851.1;CON_00347096.2;XBXL10_1g8295;XBXL10_1g10877;XBXL10_1g8289		1026.46	26988723	0.001	0.02178	High	2.37871	2.25432	2.07008	High		High			0	7.86591e+07	7.80196e+07	0	0	0
	KDVDAAYMNK	3	17	9	CON_00300725.7;CON_00009867.3;CON_00299145.9;CON_00293665.7;CON_00697851.1;CON_00347096.2;XBXL10_1g8295;XBXL10_1g10877;XBXL10_1g8289	M8(Oxidation)	1170.55	1.53614e+07	0.001	0.1331	High	2.37656		2.76285		2.48312	High			1	0	8.95907e+06	4.68799e+06	0	0	High
	AEIDNVK	4	2	1	CON_00009867.3		788.416	127223467	0.001	0.03315	High	1.56493	1.29192	1.46643	High		High			0	141756387	73071331	0	0	0
	GRLDSELR	12	10	6	CON_00300725.7;CON_00009867.3;CON_00299145.9;CON_00293665.7;CON_00697851.1;CON_IPI00241841.9		945.511	2470876328	0.001	0.03713	High	2.35241	2.29886	2.33427	High	2.29137	High	2.30828	2.29604	1	1298220822	1.34737e+09	7.7889e+08	1213129136	1.13014e+09	High	High	High
	VDALMDEINFMK	1	3	2	CON_00009867.3;CON_00697851.1	M11(Oxidation)	1441.67	86307092	0.001	0.02266	High	1.19858								0	0	0	0	0	0
	MFFDAELSQMQTHVSDTSVVLSMDNNR	1	3	2	CON_00009867.3;CON_00697851.1	M10(Oxidation); M23(Oxidation)	3134.39	0	0.001	0.02455	High	2.39162								0	0	0	0	0	0
	RISISTSGGSFRNR	1	1	1	CON_00009867.3		1537.82	0	0.002	0.1966						2.49492				2	0	0	16014352	0	0	High
	YEELQQTAGRHGDDLR	1	3	2	CON_00009867.3;CON_00697851.1		1887.89	0	0.004	0.2569						1.13938				1	0	0	9220070	0	0	High
	HEISEMNR	1	3	2	CON_00009867.3;CON_00697851.1	M6(Oxidation)	1031.46	0	0.006	0.1122			1.84954		High					0	3.21889e+07	0	0	0	0
CON_00300725.7	SWISS-PROT:P02538 Tax_Id=9606 Gene_Symbol=KRT6A Keratin, type II cytoskeletal 6A	67.55	7	4	61	1164	2.03802e+10	15218232999	1.58811e+10	1.09065e+10	1.43654e+10	1.15395e+10	550.5	63.83	55	198	542.334	62.23	54	200	677.186	482.599	497.885	356.083	64.01	62.59	62.23	58.33	58	54	52	49	254	183	190	139	564	60.0083	8.00146
	Sequence	# PSMs	# Proteins	# Protein Groups	Protein Group Accessions	Modifications	MH+ [Da]	A5: Area	q-Value	PEP	A6	XCorr A6	XCorr B6	XCorr C6	B6	XCorr D6	C6	XCorr E6	XCorr F6	# Missed Cleavages	B5: Area	C5: Area	D5: Area	E5: Area	F5: Area	D6	E6	F6
	RGFSANSAR	5	2	2	CON_00300725.7;CON_00299145.9		965.492	792618731	0	0.006113	High	2.41703	2.12686	1.79256	High		High			1	2.56075e+08	5.57198e+08	0	0	0
	DVDAAYMNK	17	17	9	CON_00300725.7;CON_00009867.3;CON_00299145.9;CON_00293665.7;CON_00697851.1;CON_00347096.2;XBXL10_1g8295;XBXL10_1g10877;XBXL10_1g8289	M7(Oxidation)	1042.45	4.54973e+08	0	0.01374	High	2.28545	2.07945	1.8674	High	1.86932	High	1.87188	1.84209	0	436285162	489644663	4.8687e+08	382987610	2.59906e+08	High	High	High
	NKYEDEINKR	50	20	11	CON_00300725.7;CON_IPI00554648.3;CON_00009867.3;CON_00299145.9;CON_00220327.3;CON_00293665.7;CON_00697851.1;CON_00462140.1;XBXL10_1g8295;XBXL10_1g8289;XBXL10_1g8291		1308.65	8020872852	0	0.01025	High	3.70003	3.46323	3.76139	High	3.93702	High	3.90545	3.5984	2	4453363553	4.38948e+09	3.29655e+09	4871622639	4.18404e+09	High	High	High
	LRSEIDHVKK	10	6	3	CON_00300725.7;CON_00299145.9;CON_00293665.7		1224.71	258743719	0	0.00119	High	3.6726	3.38732	3.64992	High	3.33689	High	3.26123	3.3043	2	1.82144e+08	2.94917e+08	8.28217e+07	9.47894e+07	7.02908e+07	High	High	High
	YEDEINKR	24	40	19	CON_IPI00290857.2;CON_00300725.7;CON_IPI00554648.3;CON_00009867.3;CON_00299145.9;CON_00220327.3;CON_00021304.1;CON_00293665.7;CON_00697851.1;CON_00221797.1;CON_00462140.1;CON_00622240.4;CON_IPI00376379.3;XBXL10_1g8295;XBXL10_1g8289;XBXL10_1g8291;XBXL10_1g10877;XBXL10_1g10870;XBXL10_1g10871		1066.52	6456119504	0	0.008032	High	1.96031	1.94761	1.86407	High	1.85402	High	1.82619	1.92686	1	4.07321e+09	3694448402	4304846388	4.86375e+09	3934580898	High	High	High
	FLEQQNK	21	50	20	CON_IPI00290857.2;CON_107456;CON_00300725.7;CON_IPI00554648.3;CON_IPI00306959.10;CON_00009867.3;CON_00299145.9;CON_106456;CON_105456;CON_00166205.2;CON_00293665.7;CON_00697851.1;CON_00124800.2;CON_00221797.1;CON_IPI00241841.9;XBXL10_1g8290;XBXL10_1g8291;XBXL10_1g10877;XBXL10_1g10870;XBXL10_1g10871		906.468	2.22081e+09	0	0.1134	High	1.69707	1.73364	1.60086	High	1.57643	High	1.55466	1.64136	0	1627774338	1836262672	1.19747e+09	1.94041e+09	1.03942e+09	High	High	High
	YEDEINK	32	43	20	CON_IPI00290857.2;CON_00300725.7;CON_IPI00554648.3;CON_00009867.3;CON_00299145.9;XBXL10_1g8291;CON_00220327.3;CON_00021304.1;CON_00293665.7;CON_00697851.1;CON_00221797.1;CON_00462140.1;CON_00622240.4;CON_IPI00376379.3;CON_IPI00241841.9;XBXL10_1g8295;XBXL10_1g8289;XBXL10_1g10877;XBXL10_1g10870;XBXL10_1g10871		910.416	15922380192	0	0.01896	High	2.1327	2.12545	1.91357	High	1.77495	High	1.92556	1.81321	0	8.65848e+09	11362991318	9786637980	9.7915e+09	9.50114e+09	High	High	High
	KLLEGEECR	19	27	11	CON_00300725.7;CON_00009867.3;CON_00299145.9;CON_IPI00174775.2;CON_00021304.1;CON_00293665.7;CON_00697851.1;CON_00221797.1;CON_00622240.4;XBXL10_1g10877;XBXL10_1g8289	C8(Carbamidomethyl)	1133.56	1.51246e+08	0	0.01377	High	2.70506	2.74776	2.88956	High	2.74487	High	2.70547	2.45344	1	1.94911e+08	197230801	1.65718e+08	2.6809e+08	1.23714e+08	High	High	High
	NKYEDEINK	25	23	12	CON_00300725.7;CON_IPI00554648.3;CON_00009867.3;CON_00299145.9;XBXL10_1g8291;CON_00220327.3;CON_00293665.7;CON_00697851.1;CON_00462140.1;CON_IPI00241841.9;XBXL10_1g8295;XBXL10_1g8289		1152.55	3188012410	0	0.08708	High	3.33727	3.50497	3.04553	High	3.26906	High	3.60094	3.18381	1	1.64644e+09	1.84262e+09	1.13915e+09	1.44402e+09	1.59798e+09	High	High	High
	LLEGEECR	21	28	12	CON_00300725.7;CON_00009867.3;CON_00299145.9;CON_IPI00174775.2;CON_00166205.2;CON_00021304.1;CON_00293665.7;CON_00697851.1;CON_00221797.1;CON_00622240.4;XBXL10_1g10877;XBXL10_1g8289	C7(Carbamidomethyl)	1005.47	5.60345e+09	0	0.02935	High	2.10841	2.09917	2.11088	High	2.11073	High	2.11532	2.10963	0	5.59857e+09	5.17908e+09	3.26645e+09	4.908e+09	2.35489e+09	High	High	High
	NTKQEIAEINR	4	4	3	CON_00300725.7;CON_00299145.9;CON_00293665.7		1315.7	3.55197e+07	0	0.0006287	High	2.59331	2.94823	1.70256	High		High			1	2.32058e+07	1.56402e+07	0	0	0
	VRFLEQQNK	22	50	20	CON_IPI00290857.2;CON_107456;CON_00300725.7;CON_IPI00554648.3;CON_IPI00306959.10;CON_00009867.3;CON_00299145.9;CON_106456;CON_105456;CON_00166205.2;CON_00293665.7;CON_00697851.1;CON_00124800.2;CON_00221797.1;CON_IPI00241841.9;XBXL10_1g8290;XBXL10_1g8291;XBXL10_1g10877;XBXL10_1g10870;XBXL10_1g10871		1161.64	4228717839	0	0.01767	High	2.65454	2.71945	2.56823	High	2.672	High	2.65601	2.5828	1	3.39655e+09	4087371328	2.19974e+09	2.78177e+09	1985595236	High	High	High
	QEIAEINR	12	4	3	CON_00300725.7;CON_00299145.9;CON_00293665.7		972.512	1543326778	0	0.003652	High	2.6045	2.27396	2.47573	High	2.40446	High	2.45283	2.45934	0	1090628190	1582107980	731022514	945658385	5.79514e+08	High	High	High
	AQYEEIAQR	22	10	5	CON_00300725.7;CON_00299145.9;CON_IPI00290078.5;CON_00021304.1;CON_00293665.7		1107.55	14354552984	0	0.002673	High	2.38185	2.37576	2.69249	High	2.4495	High	2.51956	2.42976	0	4508550546	6359279454	4312585018	6194303654	4863225296	High	High	High
	SLYGLGGSKR	6	5	3	CON_00300725.7;CON_00299145.9;CON_00293665.7		1037.57	616101196	0	0.02715	High	1.94708	1.91191	2.17373	High	2.25401	High	2.24013		1	168833492	817342428	204119864	323093352	0	High	High
	SRGSGGLGGACGGAGFGSR	19	3	3	CON_00300725.7;CON_00299145.9;CON_00293665.7	C11(Carbamidomethyl)	1667.77	8.71516e+08	0	7.976e-07	High	5.72582	5.76356	5.53046	High	5.35574	High	5.41721	4.73456	1	5.67725e+08	1.33652e+09	5.10913e+08	889367818	1.85641e+08	High	High	High
	SRAEAESWYQTK	23	8	4	CON_00300725.7;CON_00299145.9;CON_00293665.7;CON_00221797.1		1455.69	1.28835e+09	0	0.0001754	High	4.29968	4.06101	3.8515	High	3.59937	High	3.71001	3.41471	1	7.87692e+08	1091641130	5.9049e+08	811200782	388453758	High	High	High
	QLDSIVGERGR	12	4	4	CON_00300725.7;CON_00009867.3;CON_00299145.9;CON_00293665.7		1229.66	50474002	0	0.009546	High	2.47594	2.57251	2.74395	High	2.63204	High	2.55666	2.61873	1	1.61317e+08	2.85444e+08	1.13658e+08	9.19135e+07	3.18132e+07	High	High	High
	EYQELMNVK	12	16	7	CON_00300725.7;CON_IPI00554648.3;CON_00299145.9;CON_00293665.7;CON_00221797.1;XBXL10_1g8291;XBXL10_1g8295	M6(Oxidation)	1169.55	3.00971e+08	0	0.01359	High	2.25551	2.14913	2.24799	High	2.18588	High	2.20179	2.24713	0	3.02686e+08	3.98298e+08	2.11778e+08	2.18878e+08	127182717	High	High	High
	RQLDSIVGER	8	4	4	CON_00300725.7;CON_00009867.3;CON_00299145.9;CON_00293665.7		1172.64	4.13626e+08	0	0.0009457	High	3.20251	2.76972	3.2138	High	3.19693	High	2.50241	2.3316	1	108014621	4.55142e+08	309527710	64376707	24505247	High	High	High
	SGFSSVSVSR	12	1	1	CON_00300725.7		1012.51	1442442334	0	0.0002104	High	2.32923	2.25951	1.79757	High	2.27028	High	2.03221	2.27215	0	908810476	2029490568	667673696	998212871	440952588	High	High	High
	RTAAENEFVTLKK	12	6	4	CON_IPI00290857.2;CON_00300725.7;CON_00299145.9;CON_00293665.7		1506.83	1115768203	0	4.305e-05	High	3.527	4.74071	3.69602	High	3.03869	High	3.66463	3.15506	2	593780925	1.25121e+09	392099704	4.5292e+08	3.07021e+08	High	High	High
	GSGGLGGACGGAGFGSR	12	3	3	CON_00300725.7;CON_00299145.9;CON_00293665.7	C9(Carbamidomethyl)	1424.63	968475512	0	3.853e-07	High	3.95553	3.71928	4.22347	High	3.27355	High	3.41657	3.08284	0	6.16436e+08	1.06484e+09	4.83999e+08	1007937243	271849727	High	High	High
	AEAESWYQTK	6	8	4	CON_00300725.7;CON_00299145.9;CON_00293665.7;CON_00221797.1		1212.55	351442500	0	0.0004151	High	2.60834	3.055	2.26142	High	2.50063	High	2.13846	2.20617	0	211930682	258579044	126678098	49754084	0	High	High	High
	SLYGLGGSK	15	5	3	CON_00300725.7;CON_00299145.9;CON_00293665.7		881.472	120330948	0	0.005551	High	1.993	1.98885	2.08317	High	1.85111	High	1.94513		0	77375036	218463904	157808024	39509363	0	High	High
	YEELQVTAGR	20	7	4	CON_00300725.7;CON_00299145.9;CON_00293665.7;CON_00221797.1		1165.58	2015667680	0	0.0002659	High	2.69393	3.49578	2.63959	High	2.60027	High	2.60837	2.60053	0	1204848552	1875098360	889203902	1343504944	6.42028e+08	High	High	High
	QLDSIVGER	15	4	4	CON_00300725.7;CON_00009867.3;CON_00299145.9;CON_00293665.7		1016.54	7233350512	0	0.002646	High	2.36609	2.59254	2.31692	High	2.01726	High	2.41799	2.25865	0	5.0764e+09	5323248659	3370625136	4317476798	3605219395	High	High	High
	TAAENEFVTLKK	12	6	4	CON_IPI00290857.2;CON_00300725.7;CON_00299145.9;CON_00293665.7		1350.73	444083464	0	0.01778	High	3.20491	3.09843	3.26024	High	2.97485	High	3.35278	2.85221	1	321196424	486795719	179723664	228521248	1.19402e+08	High	High	High
	RTAAENEFVTLK	15	6	4	CON_IPI00290857.2;CON_00300725.7;CON_00299145.9;CON_00293665.7		1378.73	3.80351e+08	0	0.06509	High	3.52149	3.44464	3.36353	High	3.56962	High	2.99393	3.25194	1	197724322	447114100	1.51767e+08	228439430	113794218	High	High	High
	RISIGGGSCAISGGYGSR	19	3	3	CON_00300725.7;CON_00299145.9;CON_00293665.7	C9(Carbamidomethyl)	1754.86	682358410	0	1.88e-06	High	5.1794	4.09998	3.94604	High	3.78573	High	4.75146	3.83027	1	7.27666e+08	1.34576e+09	5.9028e+08	810787119	65295760	High	High	High
	AIGGGLSSVGGGSSTIK	15	2	2	CON_00300725.7;CON_00299145.9		1447.78	2771394082	0	0.000583	High	3.27246	4.01089	3.1658	High	4.24665	High	3.52138	3.42882	0	1341062064	3090280294	9.12435e+08	1310108690	6.3915e+08	High	High	High
	EYQELMNVK	4	16	7	CON_00300725.7;CON_IPI00554648.3;CON_00299145.9;CON_00293665.7;CON_00221797.1;XBXL10_1g8291;XBXL10_1g8295		1153.56	194084114	0	0.002238	High	1.61892	1.86282	1.70218	High		High			0	8.51266e+07	123591687	0	0	0
	FASFIDK	17	52	24	CON_IPI00290857.2;CON_00300725.7;CON_IPI00554648.3;CON_IPI00306959.10;CON_00009867.3;CON_00299145.9;CON_IPI00174775.2;XBXL10_1g8291;CON_105456;CON_IPI00290078.5;CON_00021304.1;CON_00293665.7;CON_00697851.1;CON_00221797.1;CON_00347096.2;CON_00462140.1;CON_00622240.4;CON_IPI00376379.3;CON_IPI00241841.9;CON_00705721.2;XBXL10_1g8295;XBXL10_1g8290;XBXL10_1g10877;XBXL10_1g8289		827.43	20889928652	0	0.01631	High	1.92991	1.93893	1.85944	High	1.86668	High	1.68189	1.85885	0	16666804464	18271764520	10620704572	15494635570	1.1965e+10	High	High	High
	ISIGGGSCAISGGYGSR	21	3	3	CON_00300725.7;CON_00299145.9;CON_00293665.7	C8(Carbamidomethyl)	1598.76	1.43898e+09	0	1.512e-07	High	3.65091	4.25623	3.52389	High	3.62503	High	3.82382	3.3314	0	907932519	1848272038	771375594	1428965870	3.64978e+08	High	High	High
	TAAENEFVTLK	18	6	4	CON_IPI00290857.2;CON_00300725.7;CON_00299145.9;CON_00293665.7		1222.63	1130548512	0	4.239e-05	High	3.11487	2.98119	3.07404	High	3.02891	High	2.94193	2.912	0	785780310	1098318642	7.231e+08	1143254363	506500205	High	High	High
	GMQDLVEDFK	4	1	1	CON_00300725.7	M2(Oxidation)	1197.55	50575103	0	0.00266	High	1.75512				1.63638		1.42104	1.26469	0	0	0	45031248	5.31645e+07	3.09684e+07	High	High	High
	NKLEGLEDALQK	24	3	3	CON_00300725.7;CON_00299145.9;CON_00293665.7		1357.73	1423836375	0	4.337e-05	High	4.32425	4.33688	4.65492	High	4.24187	High	4.21047	4.07096	1	1225160792	1617122293	682757240	690023804	4.74783e+08	High	High	High
	LEGLEDALQK	10	4	3	CON_00300725.7;CON_00299145.9;CON_00293665.7		1115.59	199631096	0	0.009565	High	2.65968	2.66756	2.60308	High	2.57997	High	2.70129	2.2925	0	135054020	2.55346e+08	2.0631e+08	1.85841e+08	1.22664e+08	High	High	High
	WTLLQEQGTK	19	5	4	CON_00300725.7;CON_00009867.3;CON_00299145.9;CON_00293665.7		1203.64	4445052518	0	0.01498	High	3.01157	3.03325	2.95757	High	3.24042	High	2.92818	2.9151	0	1718076312	2162713873	1553295237	2206260552	1342408721	High	High	High
	LALDVEIATYRK	187	19	10	CON_IPI00290857.2;CON_00300725.7;CON_00009867.3;CON_00299145.9;CON_00021304.1;CON_00293665.7;CON_00697851.1;CON_00221797.1;CON_IPI00241841.9;XBXL10_1g8291		1391.79	7597148856	0	0.001571	High	3.94584	3.84747	3.93288	High	3.94186	High	3.85479	3.99987	1	10426772410	1.11043e+10	5.15464e+09	5.4941e+09	2.00012e+09	High	High	High
	QCANLQAAIADAEQR	14	3	2	CON_00300725.7;CON_00293665.7	C2(Carbamidomethyl)	1658.79	143599277	0	4.254e-05	High	4.86072	5.28595	5.09389	High	5.05626	High	5.04578	5.05508	0	120439959	224811505	1.42941e+08	211847660	1.27217e+08	High	High	High
	GRLDSELRGMQDLVEDFK	6	1	1	CON_00300725.7	M10(Oxidation)	2124.04	0	0	0.008592	High	2.02726		2.97859		2.42397	High		2.37266	2	0	65789370	3.46093e+07	0	15148722	High		High
	ALYDAELSQMQTHISDTSVVLSMDNNR	8	3	3	CON_00300725.7;CON_00299145.9;CON_00293665.7	M10(Oxidation); M23(Oxidation)	3070.41	287146710	0	0.0006898	High	5.99677	4.77975	5.91265	High	5.71136	High	6.06864	5.04287	0	237116368	396304423	252352702	259433286	1.5814e+08	High	High	High
	GMQDLVEDFK	3	1	1	CON_00300725.7		1181.55	115638550	0	0.000761	High	2.06418		1.82408		1.69593	High			0	0	53572773	2.83324e+07	0	0	High
	LALDVEIATYR	54	25	10	CON_IPI00290857.2;CON_00300725.7;CON_00009867.3;CON_00299145.9;CON_00021304.1;CON_00293665.7;CON_00697851.1;CON_00221797.1;CON_IPI00241841.9;XBXL10_1g8291		1263.69	790710142	0	0.004243	High	2.71855	2.46588	2.97101	High	2.82559	High	2.99738	2.61927	0	862913883	1289158834	604167874	741664298	61439000	High	High	High
	ADTLTDEINFLR	23	3	3	CON_00300725.7;CON_00299145.9;CON_00293665.7		1407.71	4646570240	0	0.0001059	High	3.55966	3.45211	3.31655	High	3.42396	High	3.33967	3.39733	0	3065284954	4559123686	2112508828	2954638220	1537015768	High	High	High
	ALYDAELSQMQTHISDTSVVLSMDNNR	1	3	3	CON_00300725.7;CON_00299145.9;CON_00293665.7	M23(Oxidation)	3054.41	72467527	0	5.002e-12	High	6.15443								0	0	0	0	0	0
	QCANLQAAIADAEQRGEMALK	13	3	2	CON_00300725.7;CON_00293665.7	C2(Carbamidomethyl); M18(Oxidation)	2304.11	1.71706e+08	0	1.527e-07	High	5.52722	5.10813	4.31115	High	4.10039	High	3.77923	4.52202	1	269329558	243583024	24874027	59112469	4.45686e+07	High	High	High
	QCANLQAAIADAEQRGEMALK	3	3	2	CON_00300725.7;CON_00293665.7	C2(Carbamidomethyl)	2288.11	113712837	0	6.824e-08	High	6.53593		5.74244			High			1	0	5.38807e+07	0	0	0
	ALYDAELSQMQTHISDTSVVLSMDNNR	8	3	3	CON_00300725.7;CON_00299145.9;CON_00293665.7		3038.41	1.60392e+08	0	1.39e-12	High	6.97792	6.11444	6.16549	High	5.09134	High	6.09472	4.08361	0	6.14688e+07	88170945	2.42366e+07	36769346	9480271	High	High	High
	TVRQNLEPLFEQYINNLRR	32	6	4	CON_00300725.7;CON_00009867.3;CON_00299145.9;CON_00293665.7		2403.29	3.61363e+08	0	1.745e-06	High	4.68463	4.74764	4.95277	High	4.74959	High	4.63683	4.84498	2	2.50674e+09	2.97021e+09	1.40584e+09	1.14716e+09	189524944	High	High	High
	NLDLDSIIAEVK	56	12	6	CON_00300725.7;CON_00009867.3;CON_00299145.9;CON_00021304.1;CON_00293665.7;CON_IPI00241841.9		1329.73	2.43282e+10	0	8.066e-05	High	3.6254	3.80636	3.56252	High	3.37938	High	3.49304	3.63853	0	18561122123	18008597792	12312209872	17810070764	13152456286	High	High	High
	QNLEPLFEQYINNLRR	35	6	4	CON_00300725.7;CON_00009867.3;CON_00299145.9;CON_00293665.7		2047.07	1.12678e+10	0	5.019e-07	High	3.78767	3.77555	3.96856	High	3.7642	High	3.68824	3.61107	1	8440353877	8.35546e+09	5405363809	6.6502e+09	3.96181e+09	High	High	High
	TVRQNLEPLFEQYINNLR	12	6	4	CON_00300725.7;CON_00009867.3;CON_00299145.9;CON_00293665.7		2247.19	108496706	0	3.095e-10	High	5.89559	6.52355	6.211	High	6.20957	High	5.11734	4.26018	1	261402776	1.68082e+08	156326393	1.15567e+08	2.96027e+07	High	High	High
	QNLEPLFEQYINNLR	13	6	4	CON_00300725.7;CON_00009867.3;CON_00299145.9;CON_00293665.7		1890.97	5.97673e+08	0	2.055e-07	High	5.22226	5.42338	4.50692	High	4.33635	High	4.54563	4.5208	0	247353959	2.58665e+08	2.54467e+08	391453792	236695307	High	High	High
	RGFSANSARLPGVSR	5	2	2	CON_00300725.7;CON_00299145.9		1574.85	0	0	0.0008777			3.40826	4.23958	High		High			2	243013728	4.18557e+08	0	0	0
	QLDSIVGERGRLDSELR	8	4	4	CON_00300725.7;CON_00009867.3;CON_00299145.9;CON_00293665.7		1943.03	0	0	0.07368			3.23454	2.77146	High	2.834	High	2.6761	1.87122	2	2.00845e+08	363981015	130330700	79639370	9.77852e+06	High	High	High
	VLETKWTLLQEQGTK	12	1	1	CON_00300725.7		1773.97	0	0	1.108e-06			3.69555	3.86656	High	3.04425	High	3.36996		1	347264540	5.26259e+08	1.22912e+08	1.30576e+08	0	High	High
	KQCANLQAAIADAEQR	5	3	2	CON_00300725.7;CON_00293665.7	C3(Carbamidomethyl)	1786.89	0	0	0.003552				3.17289		4.0762	High	4.4369	4.61071	1	0	0	9.843e+06	4.04677e+07	1.90847e+07	High	High	High
	GRLDSELRGMQDLVEDFK	1	1	1	CON_00300725.7		2108.05	0	0	0.0003501				2.63946			High			2	0	99590128	0	0	0
	NLDLDSIIAEVKAQYEEIAQR	1	6	4	CON_00300725.7;CON_00299145.9;CON_00021304.1;CON_00293665.7		2418.25	0	0	3.829e-06				4.70292			High			1	0	9.25825e+06	0	0	0
	SEIDHVK	2	6	3	CON_00300725.7;CON_00299145.9;CON_00293665.7		827.427	1.67379e+07	0.001	0.03243	High	1.50134	1.40069		High					0	1.45703e+07	0	0	0	0
	DVDAAYMNK	5	17	9	CON_00300725.7;CON_00009867.3;CON_00299145.9;CON_00293665.7;CON_00697851.1;CON_00347096.2;XBXL10_1g8295;XBXL10_1g10877;XBXL10_1g8289		1026.46	26988723	0.001	0.02178	High	2.37871	2.25432	2.07008	High		High			0	7.86591e+07	7.80196e+07	0	0	0
	KDVDAAYMNK	3	17	9	CON_00300725.7;CON_00009867.3;CON_00299145.9;CON_00293665.7;CON_00697851.1;CON_00347096.2;XBXL10_1g8295;XBXL10_1g10877;XBXL10_1g8289	M8(Oxidation)	1170.55	1.53614e+07	0.001	0.1331	High	2.37656		2.76285		2.48312	High			1	0	8.95907e+06	4.68799e+06	0	0	High
	GFSANSAR	4	2	2	CON_00300725.7;CON_00299145.9		809.39	2.06022e+08	0.001	0.02441	High	1.5799	1.39069	1.43548	High		High	1.37619		0	82614670	1.56738e+08	0	80253383	0		High
	GRLDSELR	12	10	6	CON_00300725.7;CON_00009867.3;CON_00299145.9;CON_00293665.7;CON_00697851.1;CON_IPI00241841.9		945.511	2470876328	0.001	0.03713	High	2.35241	2.29886	2.33427	High	2.29137	High	2.30828	2.29604	1	1298220822	1.34737e+09	7.7889e+08	1213129136	1.13014e+09	High	High	High
	AKQDLARLLK	1	3	3	CON_00300725.7;CON_00299145.9;CON_00293665.7		1155.72	0	0.002	0.206						2.21636				2	0	0	65535808	0	0	High
	VRAEEREQIK	3	4	3	CON_00300725.7;CON_00299145.9;CON_00293665.7		1257.69	653105402	0.005	0.1713	High	2.92098								2	0	0	0	0	0
CON_00293665.7	SWISS-PROT:P04259 Tax_Id=9606 Gene_Symbol=KRT6B Keratin, type II cytoskeletal 6B	66.49	7	3	60	1156	2.03802e+10	15218232999	1.58811e+10	1.09065e+10	1.43654e+10	1.15395e+10	572.586	64.72	54	201	542.227	61.35	52	196	672.844	492.116	505.404	372.076	62.94	62.59	60.82	59.22	57	53	51	49	248	182	187	142	564	59.9623	8.00146
	Sequence	# PSMs	# Proteins	# Protein Groups	Protein Group Accessions	Modifications	MH+ [Da]	A5: Area	q-Value	PEP	A6	XCorr A6	XCorr B6	XCorr C6	B6	XCorr D6	C6	XCorr E6	XCorr F6	# Missed Cleavages	B5: Area	C5: Area	D5: Area	E5: Area	F5: Area	D6	E6	F6
	DVDAAYMNK	17	17	9	CON_00300725.7;CON_00009867.3;CON_00299145.9;CON_00293665.7;CON_00697851.1;CON_00347096.2;XBXL10_1g8295;XBXL10_1g10877;XBXL10_1g8289	M7(Oxidation)	1042.45	4.54973e+08	0	0.01374	High	2.28545	2.07945	1.8674	High	1.86932	High	1.87188	1.84209	0	436285162	489644663	4.8687e+08	382987610	2.59906e+08	High	High	High
	RGFSASSAR	2	1	1	CON_00293665.7		938.48	3.84896e+07	0	0.004881	High	2.19166		2.27111			High			1	0	8.02836e+07	0	0	0
	NKYEDEINKR	50	20	11	CON_00300725.7;CON_IPI00554648.3;CON_00009867.3;CON_00299145.9;CON_00220327.3;CON_00293665.7;CON_00697851.1;CON_00462140.1;XBXL10_1g8295;XBXL10_1g8289;XBXL10_1g8291		1308.65	8020872852	0	0.01025	High	3.70003	3.46323	3.76139	High	3.93702	High	3.90545	3.5984	2	4453363553	4.38948e+09	3.29655e+09	4871622639	4.18404e+09	High	High	High
	LRSEIDHVKK	10	6	3	CON_00300725.7;CON_00299145.9;CON_00293665.7		1224.71	258743719	0	0.00119	High	3.6726	3.38732	3.64992	High	3.33689	High	3.26123	3.3043	2	1.82144e+08	2.94917e+08	8.28217e+07	9.47894e+07	7.02908e+07	High	High	High
	YEDEINKR	24	40	19	CON_IPI00290857.2;CON_00300725.7;CON_IPI00554648.3;CON_00009867.3;CON_00299145.9;CON_00220327.3;CON_00021304.1;CON_00293665.7;CON_00697851.1;CON_00221797.1;CON_00462140.1;CON_00622240.4;CON_IPI00376379.3;XBXL10_1g8295;XBXL10_1g8289;XBXL10_1g8291;XBXL10_1g10877;XBXL10_1g10870;XBXL10_1g10871		1066.52	6456119504	0	0.008032	High	1.96031	1.94761	1.86407	High	1.85402	High	1.82619	1.92686	1	4.07321e+09	3694448402	4304846388	4.86375e+09	3934580898	High	High	High
	FLEQQNK	21	50	20	CON_IPI00290857.2;CON_107456;CON_00300725.7;CON_IPI00554648.3;CON_IPI00306959.10;CON_00009867.3;CON_00299145.9;CON_106456;CON_105456;CON_00166205.2;CON_00293665.7;CON_00697851.1;CON_00124800.2;CON_00221797.1;CON_IPI00241841.9;XBXL10_1g8290;XBXL10_1g8291;XBXL10_1g10877;XBXL10_1g10870;XBXL10_1g10871		906.468	2.22081e+09	0	0.1134	High	1.69707	1.73364	1.60086	High	1.57643	High	1.55466	1.64136	0	1627774338	1836262672	1.19747e+09	1.94041e+09	1.03942e+09	High	High	High
	YEDEINK	32	43	20	CON_IPI00290857.2;CON_00300725.7;CON_IPI00554648.3;CON_00009867.3;CON_00299145.9;XBXL10_1g8291;CON_00220327.3;CON_00021304.1;CON_00293665.7;CON_00697851.1;CON_00221797.1;CON_00462140.1;CON_00622240.4;CON_IPI00376379.3;CON_IPI00241841.9;XBXL10_1g8295;XBXL10_1g8289;XBXL10_1g10877;XBXL10_1g10870;XBXL10_1g10871		910.416	15922380192	0	0.01896	High	2.1327	2.12545	1.91357	High	1.77495	High	1.92556	1.81321	0	8.65848e+09	11362991318	9786637980	9.7915e+09	9.50114e+09	High	High	High
	KLLEGEECR	19	27	11	CON_00300725.7;CON_00009867.3;CON_00299145.9;CON_IPI00174775.2;CON_00021304.1;CON_00293665.7;CON_00697851.1;CON_00221797.1;CON_00622240.4;XBXL10_1g10877;XBXL10_1g8289	C8(Carbamidomethyl)	1133.56	1.51246e+08	0	0.01377	High	2.70506	2.74776	2.88956	High	2.74487	High	2.70547	2.45344	1	1.94911e+08	197230801	1.65718e+08	2.6809e+08	1.23714e+08	High	High	High
	NKYEDEINK	25	23	12	CON_00300725.7;CON_IPI00554648.3;CON_00009867.3;CON_00299145.9;XBXL10_1g8291;CON_00220327.3;CON_00293665.7;CON_00697851.1;CON_00462140.1;CON_IPI00241841.9;XBXL10_1g8295;XBXL10_1g8289		1152.55	3188012410	0	0.08708	High	3.33727	3.50497	3.04553	High	3.26906	High	3.60094	3.18381	1	1.64644e+09	1.84262e+09	1.13915e+09	1.44402e+09	1.59798e+09	High	High	High
	LLEGEECR	21	28	12	CON_00300725.7;CON_00009867.3;CON_00299145.9;CON_IPI00174775.2;CON_00166205.2;CON_00021304.1;CON_00293665.7;CON_00697851.1;CON_00221797.1;CON_00622240.4;XBXL10_1g10877;XBXL10_1g8289	C7(Carbamidomethyl)	1005.47	5.60345e+09	0	0.02935	High	2.10841	2.09917	2.11088	High	2.11073	High	2.11532	2.10963	0	5.59857e+09	5.17908e+09	3.26645e+09	4.908e+09	2.35489e+09	High	High	High
	NTKQEIAEINR	4	4	3	CON_00300725.7;CON_00299145.9;CON_00293665.7		1315.7	3.55197e+07	0	0.0006287	High	2.59331	2.94823	1.70256	High		High			1	2.32058e+07	1.56402e+07	0	0	0
	VRFLEQQNK	22	50	20	CON_IPI00290857.2;CON_107456;CON_00300725.7;CON_IPI00554648.3;CON_IPI00306959.10;CON_00009867.3;CON_00299145.9;CON_106456;CON_105456;CON_00166205.2;CON_00293665.7;CON_00697851.1;CON_00124800.2;CON_00221797.1;CON_IPI00241841.9;XBXL10_1g8290;XBXL10_1g8291;XBXL10_1g10877;XBXL10_1g10870;XBXL10_1g10871		1161.64	4228717839	0	0.01767	High	2.65454	2.71945	2.56823	High	2.672	High	2.65601	2.5828	1	3.39655e+09	4087371328	2.19974e+09	2.78177e+09	1985595236	High	High	High
	QEIAEINR	12	4	3	CON_00300725.7;CON_00299145.9;CON_00293665.7		972.512	1543326778	0	0.003652	High	2.6045	2.27396	2.47573	High	2.40446	High	2.45283	2.45934	0	1090628190	1582107980	731022514	945658385	5.79514e+08	High	High	High
	AQYEEIAQR	22	10	5	CON_00300725.7;CON_00299145.9;CON_IPI00290078.5;CON_00021304.1;CON_00293665.7		1107.55	14354552984	0	0.002673	High	2.38185	2.37576	2.69249	High	2.4495	High	2.51956	2.42976	0	4508550546	6359279454	4312585018	6194303654	4863225296	High	High	High
	SLYGLGGSKR	6	5	3	CON_00300725.7;CON_00299145.9;CON_00293665.7		1037.57	616101196	0	0.02715	High	1.94708	1.91191	2.17373	High	2.25401	High	2.24013		1	168833492	817342428	204119864	323093352	0	High	High
	SRGSGGLGGACGGAGFGSR	19	3	3	CON_00300725.7;CON_00299145.9;CON_00293665.7	C11(Carbamidomethyl)	1667.77	8.71516e+08	0	7.976e-07	High	5.72582	5.76356	5.53046	High	5.35574	High	5.41721	4.73456	1	5.67725e+08	1.33652e+09	5.10913e+08	889367818	1.85641e+08	High	High	High
	SRAEAESWYQTK	23	8	4	CON_00300725.7;CON_00299145.9;CON_00293665.7;CON_00221797.1		1455.69	1.28835e+09	0	0.0001754	High	4.29968	4.06101	3.8515	High	3.59937	High	3.71001	3.41471	1	7.87692e+08	1091641130	5.9049e+08	811200782	388453758	High	High	High
	QLDSIVGERGR	12	4	4	CON_00300725.7;CON_00009867.3;CON_00299145.9;CON_00293665.7		1229.66	50474002	0	0.009546	High	2.47594	2.57251	2.74395	High	2.63204	High	2.55666	2.61873	1	1.61317e+08	2.85444e+08	1.13658e+08	9.19135e+07	3.18132e+07	High	High	High
	EYQELMNVK	12	16	7	CON_00300725.7;CON_IPI00554648.3;CON_00299145.9;CON_00293665.7;CON_00221797.1;XBXL10_1g8291;XBXL10_1g8295	M6(Oxidation)	1169.55	3.00971e+08	0	0.01359	High	2.25551	2.14913	2.24799	High	2.18588	High	2.20179	2.24713	0	3.02686e+08	3.98298e+08	2.11778e+08	2.18878e+08	127182717	High	High	High
	RQLDSIVGER	8	4	4	CON_00300725.7;CON_00009867.3;CON_00299145.9;CON_00293665.7		1172.64	4.13626e+08	0	0.0009457	High	3.20251	2.76972	3.2138	High	3.19693	High	2.50241	2.3316	1	108014621	4.55142e+08	309527710	64376707	24505247	High	High	High
	ATGGGLSSVGGGSSTIK	12	1	1	CON_00293665.7		1435.74	713888648	0	3.064e-06	High	4.85753	4.01371	4.39662	High	4.17379	High	3.72903	2.92083	0	321591808	7.93924e+08	2.62333e+08	338140295	2.13725e+08	High	High	High
	RTAAENEFVTLKK	12	6	4	CON_IPI00290857.2;CON_00300725.7;CON_00299145.9;CON_00293665.7		1506.83	1115768203	0	4.305e-05	High	3.527	4.74071	3.69602	High	3.03869	High	3.66463	3.15506	2	593780925	1.25121e+09	392099704	4.5292e+08	3.07021e+08	High	High	High
	GSGGLGGACGGAGFGSR	12	3	3	CON_00300725.7;CON_00299145.9;CON_00293665.7	C9(Carbamidomethyl)	1424.63	968475512	0	3.853e-07	High	3.95553	3.71928	4.22347	High	3.27355	High	3.41657	3.08284	0	6.16436e+08	1.06484e+09	4.83999e+08	1007937243	271849727	High	High	High
	AEAESWYQTK	6	8	4	CON_00300725.7;CON_00299145.9;CON_00293665.7;CON_00221797.1		1212.55	351442500	0	0.0004151	High	2.60834	3.055	2.26142	High	2.50063	High	2.13846	2.20617	0	211930682	258579044	126678098	49754084	0	High	High	High
	SLYGLGGSK	15	5	3	CON_00300725.7;CON_00299145.9;CON_00293665.7		881.472	120330948	0	0.005551	High	1.993	1.98885	2.08317	High	1.85111	High	1.94513		0	77375036	218463904	157808024	39509363	0	High	High
	YEELQVTAGR	20	7	4	CON_00300725.7;CON_00299145.9;CON_00293665.7;CON_00221797.1		1165.58	2015667680	0	0.0002659	High	2.69393	3.49578	2.63959	High	2.60027	High	2.60837	2.60053	0	1204848552	1875098360	889203902	1343504944	6.42028e+08	High	High	High
	QLDSIVGER	15	4	4	CON_00300725.7;CON_00009867.3;CON_00299145.9;CON_00293665.7		1016.54	7233350512	0	0.002646	High	2.36609	2.59254	2.31692	High	2.01726	High	2.41799	2.25865	0	5.0764e+09	5323248659	3370625136	4317476798	3605219395	High	High	High
	TAAENEFVTLKK	12	6	4	CON_IPI00290857.2;CON_00300725.7;CON_00299145.9;CON_00293665.7		1350.73	444083464	0	0.01778	High	3.20491	3.09843	3.26024	High	2.97485	High	3.35278	2.85221	1	321196424	486795719	179723664	228521248	1.19402e+08	High	High	High
	SGFSSISVSR	10	2	2	CON_00299145.9;CON_00293665.7		1026.52	1073862800	0	0.0002531	High	2.73295	1.81268	2.04615	High	1.92989	High	1.72602	1.98184	0	497873150	1242228221	402635852	597774241	211664506	High	High	High
	RTAAENEFVTLK	15	6	4	CON_IPI00290857.2;CON_00300725.7;CON_00299145.9;CON_00293665.7		1378.73	3.80351e+08	0	0.06509	High	3.52149	3.44464	3.36353	High	3.56962	High	2.99393	3.25194	1	197724322	447114100	1.51767e+08	228439430	113794218	High	High	High
	RISIGGGSCAISGGYGSR	19	3	3	CON_00300725.7;CON_00299145.9;CON_00293665.7	C9(Carbamidomethyl)	1754.86	682358410	0	1.88e-06	High	5.1794	4.09998	3.94604	High	3.78573	High	4.75146	3.83027	1	7.27666e+08	1.34576e+09	5.9028e+08	810787119	65295760	High	High	High
	EYQELMNVK	4	16	7	CON_00300725.7;CON_IPI00554648.3;CON_00299145.9;CON_00293665.7;CON_00221797.1;XBXL10_1g8291;XBXL10_1g8295		1153.56	194084114	0	0.002238	High	1.61892	1.86282	1.70218	High		High			0	8.51266e+07	123591687	0	0	0
	FASFIDK	17	52	24	CON_IPI00290857.2;CON_00300725.7;CON_IPI00554648.3;CON_IPI00306959.10;CON_00009867.3;CON_00299145.9;CON_IPI00174775.2;XBXL10_1g8291;CON_105456;CON_IPI00290078.5;CON_00021304.1;CON_00293665.7;CON_00697851.1;CON_00221797.1;CON_00347096.2;CON_00462140.1;CON_00622240.4;CON_IPI00376379.3;CON_IPI00241841.9;CON_00705721.2;XBXL10_1g8295;XBXL10_1g8290;XBXL10_1g10877;XBXL10_1g8289		827.43	20889928652	0	0.01631	High	1.92991	1.93893	1.85944	High	1.86668	High	1.68189	1.85885	0	16666804464	18271764520	10620704572	15494635570	1.1965e+10	High	High	High
	ISIGGGSCAISGGYGSR	21	3	3	CON_00300725.7;CON_00299145.9;CON_00293665.7	C8(Carbamidomethyl)	1598.76	1.43898e+09	0	1.512e-07	High	3.65091	4.25623	3.52389	High	3.62503	High	3.82382	3.3314	0	907932519	1848272038	771375594	1428965870	3.64978e+08	High	High	High
	NMQDLVEDLK	9	2	2	CON_00299145.9;CON_00293665.7	M2(Oxidation)	1220.58	0	0	3.258e-05	High	2.70505	2.68337	2.77161	High	2.40664	High	2.60085	2.52844	0	37516558	5.68854e+07	5.19114e+07	47973540	0	High	High	High
	TAAENEFVTLK	18	6	4	CON_IPI00290857.2;CON_00300725.7;CON_00299145.9;CON_00293665.7		1222.63	1130548512	0	4.239e-05	High	3.11487	2.98119	3.07404	High	3.02891	High	2.94193	2.912	0	785780310	1098318642	7.231e+08	1143254363	506500205	High	High	High
	NKLEGLEDALQK	24	3	3	CON_00300725.7;CON_00299145.9;CON_00293665.7		1357.73	1423836375	0	4.337e-05	High	4.32425	4.33688	4.65492	High	4.24187	High	4.21047	4.07096	1	1225160792	1617122293	682757240	690023804	4.74783e+08	High	High	High
	LEGLEDALQK	10	4	3	CON_00300725.7;CON_00299145.9;CON_00293665.7		1115.59	199631096	0	0.009565	High	2.65968	2.66756	2.60308	High	2.57997	High	2.70129	2.2925	0	135054020	2.55346e+08	2.0631e+08	1.85841e+08	1.22664e+08	High	High	High
	WTLLQEQGTK	19	5	4	CON_00300725.7;CON_00009867.3;CON_00299145.9;CON_00293665.7		1203.64	4445052518	0	0.01498	High	3.01157	3.03325	2.95757	High	3.24042	High	2.92818	2.9151	0	1718076312	2162713873	1553295237	2206260552	1342408721	High	High	High
	LALDVEIATYRK	187	19	10	CON_IPI00290857.2;CON_00300725.7;CON_00009867.3;CON_00299145.9;CON_00021304.1;CON_00293665.7;CON_00697851.1;CON_00221797.1;CON_IPI00241841.9;XBXL10_1g8291		1391.79	7597148856	0	0.001571	High	3.94584	3.84747	3.93288	High	3.94186	High	3.85479	3.99987	1	10426772410	1.11043e+10	5.15464e+09	5.4941e+09	2.00012e+09	High	High	High
	VLDTKWTLLQEQGTK	23	4	3	CON_00009867.3;CON_00299145.9;CON_00293665.7		1759.96	1375720222	0	1.399e-08	High	5.12866	5.08817	5.17295	High	4.92489	High	4.87401	4.82868	1	2611947685	3444634064	1.21572e+09	1.41943e+09	478851728	High	High	High
	QCANLQAAIADAEQR	14	3	2	CON_00300725.7;CON_00293665.7	C2(Carbamidomethyl)	1658.79	143599277	0	4.254e-05	High	4.86072	5.28595	5.09389	High	5.05626	High	5.04578	5.05508	0	120439959	224811505	1.42941e+08	211847660	1.27217e+08	High	High	High
	ALYDAELSQMQTHISDTSVVLSMDNNR	8	3	3	CON_00300725.7;CON_00299145.9;CON_00293665.7	M10(Oxidation); M23(Oxidation)	3070.41	287146710	0	0.0006898	High	5.99677	4.77975	5.91265	High	5.71136	High	6.06864	5.04287	0	237116368	396304423	252352702	259433286	1.5814e+08	High	High	High
	NMQDLVEDLK	1	2	2	CON_00299145.9;CON_00293665.7		1204.59	139818612	0	0.0002853	High	2.54231								0	0	0	0	0	0
	LALDVEIATYR	54	25	10	CON_IPI00290857.2;CON_00300725.7;CON_00009867.3;CON_00299145.9;CON_00021304.1;CON_00293665.7;CON_00697851.1;CON_00221797.1;CON_IPI00241841.9;XBXL10_1g8291		1263.69	790710142	0	0.004243	High	2.71855	2.46588	2.97101	High	2.82559	High	2.99738	2.61927	0	862913883	1289158834	604167874	741664298	61439000	High	High	High
	ADTLTDEINFLR	23	3	3	CON_00300725.7;CON_00299145.9;CON_00293665.7		1407.71	4646570240	0	0.0001059	High	3.55966	3.45211	3.31655	High	3.42396	High	3.33967	3.39733	0	3065284954	4559123686	2112508828	2954638220	1537015768	High	High	High
	ALYDAELSQMQTHISDTSVVLSMDNNR	1	3	3	CON_00300725.7;CON_00299145.9;CON_00293665.7	M23(Oxidation)	3054.41	72467527	0	5.002e-12	High	6.15443								0	0	0	0	0	0
	QCANLQAAIADAEQRGEMALK	13	3	2	CON_00300725.7;CON_00293665.7	C2(Carbamidomethyl); M18(Oxidation)	2304.11	1.71706e+08	0	1.527e-07	High	5.52722	5.10813	4.31115	High	4.10039	High	3.77923	4.52202	1	269329558	243583024	24874027	59112469	4.45686e+07	High	High	High
	QCANLQAAIADAEQRGEMALK	3	3	2	CON_00300725.7;CON_00293665.7	C2(Carbamidomethyl)	2288.11	113712837	0	6.824e-08	High	6.53593		5.74244			High			1	0	5.38807e+07	0	0	0
	ALYDAELSQMQTHISDTSVVLSMDNNR	8	3	3	CON_00300725.7;CON_00299145.9;CON_00293665.7		3038.41	1.60392e+08	0	1.39e-12	High	6.97792	6.11444	6.16549	High	5.09134	High	6.09472	4.08361	0	6.14688e+07	88170945	2.42366e+07	36769346	9480271	High	High	High
	TVRQNLEPLFEQYINNLRR	32	6	4	CON_00300725.7;CON_00009867.3;CON_00299145.9;CON_00293665.7		2403.29	3.61363e+08	0	1.745e-06	High	4.68463	4.74764	4.95277	High	4.74959	High	4.63683	4.84498	2	2.50674e+09	2.97021e+09	1.40584e+09	1.14716e+09	189524944	High	High	High
	NLDLDSIIAEVK	56	12	6	CON_00300725.7;CON_00009867.3;CON_00299145.9;CON_00021304.1;CON_00293665.7;CON_IPI00241841.9		1329.73	2.43282e+10	0	8.066e-05	High	3.6254	3.80636	3.56252	High	3.37938	High	3.49304	3.63853	0	18561122123	18008597792	12312209872	17810070764	13152456286	High	High	High
	QNLEPLFEQYINNLRR	35	6	4	CON_00300725.7;CON_00009867.3;CON_00299145.9;CON_00293665.7		2047.07	1.12678e+10	0	5.019e-07	High	3.78767	3.77555	3.96856	High	3.7642	High	3.68824	3.61107	1	8440353877	8.35546e+09	5405363809	6.6502e+09	3.96181e+09	High	High	High
	TVRQNLEPLFEQYINNLR	12	6	4	CON_00300725.7;CON_00009867.3;CON_00299145.9;CON_00293665.7		2247.19	108496706	0	3.095e-10	High	5.89559	6.52355	6.211	High	6.20957	High	5.11734	4.26018	1	261402776	1.68082e+08	156326393	1.15567e+08	2.96027e+07	High	High	High
	QNLEPLFEQYINNLR	13	6	4	CON_00300725.7;CON_00009867.3;CON_00299145.9;CON_00293665.7		1890.97	5.97673e+08	0	2.055e-07	High	5.22226	5.42338	4.50692	High	4.33635	High	4.54563	4.5208	0	247353959	2.58665e+08	2.54467e+08	391453792	236695307	High	High	High
	QLDSIVGERGRLDSELR	8	4	4	CON_00300725.7;CON_00009867.3;CON_00299145.9;CON_00293665.7		1943.03	0	0	0.07368			3.23454	2.77146	High	2.834	High	2.6761	1.87122	2	2.00845e+08	363981015	130330700	79639370	9.77852e+06	High	High	High
	KQCANLQAAIADAEQR	5	3	2	CON_00300725.7;CON_00293665.7	C3(Carbamidomethyl)	1786.89	0	0	0.003552				3.17289		4.0762	High	4.4369	4.61071	1	0	0	9.843e+06	4.04677e+07	1.90847e+07	High	High	High
	GRLDSELRNMQDLVEDLK	1	2	2	CON_00299145.9;CON_00293665.7		2131.08	0	0	0.0007903				2.47505			High			2	0	39823078	0	0	0
	NLDLDSIIAEVKAQYEEIAQR	1	6	4	CON_00300725.7;CON_00299145.9;CON_00021304.1;CON_00293665.7		2418.25	0	0	3.829e-06				4.70292			High			1	0	9.25825e+06	0	0	0
	SEIDHVK	2	6	3	CON_00300725.7;CON_00299145.9;CON_00293665.7		827.427	1.67379e+07	0.001	0.03243	High	1.50134	1.40069		High					0	1.45703e+07	0	0	0	0
	DVDAAYMNK	5	17	9	CON_00300725.7;CON_00009867.3;CON_00299145.9;CON_00293665.7;CON_00697851.1;CON_00347096.2;XBXL10_1g8295;XBXL10_1g10877;XBXL10_1g8289		1026.46	26988723	0.001	0.02178	High	2.37871	2.25432	2.07008	High		High			0	7.86591e+07	7.80196e+07	0	0	0
	KDVDAAYMNK	3	17	9	CON_00300725.7;CON_00009867.3;CON_00299145.9;CON_00293665.7;CON_00697851.1;CON_00347096.2;XBXL10_1g8295;XBXL10_1g10877;XBXL10_1g8289	M8(Oxidation)	1170.55	1.53614e+07	0.001	0.1331	High	2.37656		2.76285		2.48312	High			1	0	8.95907e+06	4.68799e+06	0	0	High
	GRLDSELR	12	10	6	CON_00300725.7;CON_00009867.3;CON_00299145.9;CON_00293665.7;CON_00697851.1;CON_IPI00241841.9		945.511	2470876328	0.001	0.03713	High	2.35241	2.29886	2.33427	High	2.29137	High	2.30828	2.29604	1	1298220822	1.34737e+09	7.7889e+08	1213129136	1.13014e+09	High	High	High
	AKQDLARLLK	1	3	3	CON_00300725.7;CON_00299145.9;CON_00293665.7		1155.72	0	0.002	0.206						2.21636				2	0	0	65535808	0	0	High
	GFSASSAR	1	1	1	CON_00293665.7		782.38	0	0.004	0.121				1.88476			High			0	0	1.97105e+07	0	0	0
	VRAEEREQIK	3	4	3	CON_00300725.7;CON_00299145.9;CON_00293665.7		1257.69	653105402	0.005	0.1713	High	2.92098								2	0	0	0	0	0
CON_00299145.9	SWISS-PROT:P48668 Tax_Id=9606 Gene_Symbol=KRT6C Keratin, type II cytoskeletal 6C	67.55	7	2	60	1138	2.03802e+10	15218232999	1.58811e+10	1.09065e+10	1.43654e+10	1.15395e+10	541.91	60.99	53	197	532.446	60.28	53	197	660.947	459.739	492.192	346.063	64.01	58.87	61.17	55.5	57	50	50	46	248	174	186	136	564	59.9883	8.00146
	Sequence	# PSMs	# Proteins	# Protein Groups	Protein Group Accessions	Modifications	MH+ [Da]	A5: Area	q-Value	PEP	A6	XCorr A6	XCorr B6	XCorr C6	B6	XCorr D6	C6	XCorr E6	XCorr F6	# Missed Cleavages	B5: Area	C5: Area	D5: Area	E5: Area	F5: Area	D6	E6	F6
	RGFSANSAR	5	2	2	CON_00300725.7;CON_00299145.9		965.492	792618731	0	0.006113	High	2.41703	2.12686	1.79256	High		High			1	2.56075e+08	5.57198e+08	0	0	0
	DVDAAYMNK	17	17	9	CON_00300725.7;CON_00009867.3;CON_00299145.9;CON_00293665.7;CON_00697851.1;CON_00347096.2;XBXL10_1g8295;XBXL10_1g10877;XBXL10_1g8289	M7(Oxidation)	1042.45	4.54973e+08	0	0.01374	High	2.28545	2.07945	1.8674	High	1.86932	High	1.87188	1.84209	0	436285162	489644663	4.8687e+08	382987610	2.59906e+08	High	High	High
	NKYEDEINKR	50	20	11	CON_00300725.7;CON_IPI00554648.3;CON_00009867.3;CON_00299145.9;CON_00220327.3;CON_00293665.7;CON_00697851.1;CON_00462140.1;XBXL10_1g8295;XBXL10_1g8289;XBXL10_1g8291		1308.65	8020872852	0	0.01025	High	3.70003	3.46323	3.76139	High	3.93702	High	3.90545	3.5984	2	4453363553	4.38948e+09	3.29655e+09	4871622639	4.18404e+09	High	High	High
	LRSEIDHVKK	10	6	3	CON_00300725.7;CON_00299145.9;CON_00293665.7		1224.71	258743719	0	0.00119	High	3.6726	3.38732	3.64992	High	3.33689	High	3.26123	3.3043	2	1.82144e+08	2.94917e+08	8.28217e+07	9.47894e+07	7.02908e+07	High	High	High
	YEDEINKR	24	40	19	CON_IPI00290857.2;CON_00300725.7;CON_IPI00554648.3;CON_00009867.3;CON_00299145.9;CON_00220327.3;CON_00021304.1;CON_00293665.7;CON_00697851.1;CON_00221797.1;CON_00462140.1;CON_00622240.4;CON_IPI00376379.3;XBXL10_1g8295;XBXL10_1g8289;XBXL10_1g8291;XBXL10_1g10877;XBXL10_1g10870;XBXL10_1g10871		1066.52	6456119504	0	0.008032	High	1.96031	1.94761	1.86407	High	1.85402	High	1.82619	1.92686	1	4.07321e+09	3694448402	4304846388	4.86375e+09	3934580898	High	High	High
	FLEQQNK	21	50	20	CON_IPI00290857.2;CON_107456;CON_00300725.7;CON_IPI00554648.3;CON_IPI00306959.10;CON_00009867.3;CON_00299145.9;CON_106456;CON_105456;CON_00166205.2;CON_00293665.7;CON_00697851.1;CON_00124800.2;CON_00221797.1;CON_IPI00241841.9;XBXL10_1g8290;XBXL10_1g8291;XBXL10_1g10877;XBXL10_1g10870;XBXL10_1g10871		906.468	2.22081e+09	0	0.1134	High	1.69707	1.73364	1.60086	High	1.57643	High	1.55466	1.64136	0	1627774338	1836262672	1.19747e+09	1.94041e+09	1.03942e+09	High	High	High
	YEDEINK	32	43	20	CON_IPI00290857.2;CON_00300725.7;CON_IPI00554648.3;CON_00009867.3;CON_00299145.9;XBXL10_1g8291;CON_00220327.3;CON_00021304.1;CON_00293665.7;CON_00697851.1;CON_00221797.1;CON_00462140.1;CON_00622240.4;CON_IPI00376379.3;CON_IPI00241841.9;XBXL10_1g8295;XBXL10_1g8289;XBXL10_1g10877;XBXL10_1g10870;XBXL10_1g10871		910.416	15922380192	0	0.01896	High	2.1327	2.12545	1.91357	High	1.77495	High	1.92556	1.81321	0	8.65848e+09	11362991318	9786637980	9.7915e+09	9.50114e+09	High	High	High
	KLLEGEECR	19	27	11	CON_00300725.7;CON_00009867.3;CON_00299145.9;CON_IPI00174775.2;CON_00021304.1;CON_00293665.7;CON_00697851.1;CON_00221797.1;CON_00622240.4;XBXL10_1g10877;XBXL10_1g8289	C8(Carbamidomethyl)	1133.56	1.51246e+08	0	0.01377	High	2.70506	2.74776	2.88956	High	2.74487	High	2.70547	2.45344	1	1.94911e+08	197230801	1.65718e+08	2.6809e+08	1.23714e+08	High	High	High
	NKYEDEINK	25	23	12	CON_00300725.7;CON_IPI00554648.3;CON_00009867.3;CON_00299145.9;XBXL10_1g8291;CON_00220327.3;CON_00293665.7;CON_00697851.1;CON_00462140.1;CON_IPI00241841.9;XBXL10_1g8295;XBXL10_1g8289		1152.55	3188012410	0	0.08708	High	3.33727	3.50497	3.04553	High	3.26906	High	3.60094	3.18381	1	1.64644e+09	1.84262e+09	1.13915e+09	1.44402e+09	1.59798e+09	High	High	High
	LLEGEECR	21	28	12	CON_00300725.7;CON_00009867.3;CON_00299145.9;CON_IPI00174775.2;CON_00166205.2;CON_00021304.1;CON_00293665.7;CON_00697851.1;CON_00221797.1;CON_00622240.4;XBXL10_1g10877;XBXL10_1g8289	C7(Carbamidomethyl)	1005.47	5.60345e+09	0	0.02935	High	2.10841	2.09917	2.11088	High	2.11073	High	2.11532	2.10963	0	5.59857e+09	5.17908e+09	3.26645e+09	4.908e+09	2.35489e+09	High	High	High
	NTKQEIAEINR	4	4	3	CON_00300725.7;CON_00299145.9;CON_00293665.7		1315.7	3.55197e+07	0	0.0006287	High	2.59331	2.94823	1.70256	High		High			1	2.32058e+07	1.56402e+07	0	0	0
	VRFLEQQNK	22	50	20	CON_IPI00290857.2;CON_107456;CON_00300725.7;CON_IPI00554648.3;CON_IPI00306959.10;CON_00009867.3;CON_00299145.9;CON_106456;CON_105456;CON_00166205.2;CON_00293665.7;CON_00697851.1;CON_00124800.2;CON_00221797.1;CON_IPI00241841.9;XBXL10_1g8290;XBXL10_1g8291;XBXL10_1g10877;XBXL10_1g10870;XBXL10_1g10871		1161.64	4228717839	0	0.01767	High	2.65454	2.71945	2.56823	High	2.672	High	2.65601	2.5828	1	3.39655e+09	4087371328	2.19974e+09	2.78177e+09	1985595236	High	High	High
	QEIAEINR	12	4	3	CON_00300725.7;CON_00299145.9;CON_00293665.7		972.512	1543326778	0	0.003652	High	2.6045	2.27396	2.47573	High	2.40446	High	2.45283	2.45934	0	1090628190	1582107980	731022514	945658385	5.79514e+08	High	High	High
	AQYEEIAQR	22	10	5	CON_00300725.7;CON_00299145.9;CON_IPI00290078.5;CON_00021304.1;CON_00293665.7		1107.55	14354552984	0	0.002673	High	2.38185	2.37576	2.69249	High	2.4495	High	2.51956	2.42976	0	4508550546	6359279454	4312585018	6194303654	4863225296	High	High	High
	SLYGLGGSKR	6	5	3	CON_00300725.7;CON_00299145.9;CON_00293665.7		1037.57	616101196	0	0.02715	High	1.94708	1.91191	2.17373	High	2.25401	High	2.24013		1	168833492	817342428	204119864	323093352	0	High	High
	SRGSGGLGGACGGAGFGSR	19	3	3	CON_00300725.7;CON_00299145.9;CON_00293665.7	C11(Carbamidomethyl)	1667.77	8.71516e+08	0	7.976e-07	High	5.72582	5.76356	5.53046	High	5.35574	High	5.41721	4.73456	1	5.67725e+08	1.33652e+09	5.10913e+08	889367818	1.85641e+08	High	High	High
	SRAEAESWYQTK	23	8	4	CON_00300725.7;CON_00299145.9;CON_00293665.7;CON_00221797.1		1455.69	1.28835e+09	0	0.0001754	High	4.29968	4.06101	3.8515	High	3.59937	High	3.71001	3.41471	1	7.87692e+08	1091641130	5.9049e+08	811200782	388453758	High	High	High
	QLDSIVGERGR	12	4	4	CON_00300725.7;CON_00009867.3;CON_00299145.9;CON_00293665.7		1229.66	50474002	0	0.009546	High	2.47594	2.57251	2.74395	High	2.63204	High	2.55666	2.61873	1	1.61317e+08	2.85444e+08	1.13658e+08	9.19135e+07	3.18132e+07	High	High	High
	EYQELMNVK	12	16	7	CON_00300725.7;CON_IPI00554648.3;CON_00299145.9;CON_00293665.7;CON_00221797.1;XBXL10_1g8291;XBXL10_1g8295	M6(Oxidation)	1169.55	3.00971e+08	0	0.01359	High	2.25551	2.14913	2.24799	High	2.18588	High	2.20179	2.24713	0	3.02686e+08	3.98298e+08	2.11778e+08	2.18878e+08	127182717	High	High	High
	RQLDSIVGER	8	4	4	CON_00300725.7;CON_00009867.3;CON_00299145.9;CON_00293665.7		1172.64	4.13626e+08	0	0.0009457	High	3.20251	2.76972	3.2138	High	3.19693	High	2.50241	2.3316	1	108014621	4.55142e+08	309527710	64376707	24505247	High	High	High
	RTAAENEFVTLKK	12	6	4	CON_IPI00290857.2;CON_00300725.7;CON_00299145.9;CON_00293665.7		1506.83	1115768203	0	4.305e-05	High	3.527	4.74071	3.69602	High	3.03869	High	3.66463	3.15506	2	593780925	1.25121e+09	392099704	4.5292e+08	3.07021e+08	High	High	High
	GSGGLGGACGGAGFGSR	12	3	3	CON_00300725.7;CON_00299145.9;CON_00293665.7	C9(Carbamidomethyl)	1424.63	968475512	0	3.853e-07	High	3.95553	3.71928	4.22347	High	3.27355	High	3.41657	3.08284	0	6.16436e+08	1.06484e+09	4.83999e+08	1007937243	271849727	High	High	High
	AEAESWYQTK	6	8	4	CON_00300725.7;CON_00299145.9;CON_00293665.7;CON_00221797.1		1212.55	351442500	0	0.0004151	High	2.60834	3.055	2.26142	High	2.50063	High	2.13846	2.20617	0	211930682	258579044	126678098	49754084	0	High	High	High
	SLYGLGGSK	15	5	3	CON_00300725.7;CON_00299145.9;CON_00293665.7		881.472	120330948	0	0.005551	High	1.993	1.98885	2.08317	High	1.85111	High	1.94513		0	77375036	218463904	157808024	39509363	0	High	High
	YEELQVTAGR	20	7	4	CON_00300725.7;CON_00299145.9;CON_00293665.7;CON_00221797.1		1165.58	2015667680	0	0.0002659	High	2.69393	3.49578	2.63959	High	2.60027	High	2.60837	2.60053	0	1204848552	1875098360	889203902	1343504944	6.42028e+08	High	High	High
	QLDSIVGER	15	4	4	CON_00300725.7;CON_00009867.3;CON_00299145.9;CON_00293665.7		1016.54	7233350512	0	0.002646	High	2.36609	2.59254	2.31692	High	2.01726	High	2.41799	2.25865	0	5.0764e+09	5323248659	3370625136	4317476798	3605219395	High	High	High
	TAAENEFVTLKK	12	6	4	CON_IPI00290857.2;CON_00300725.7;CON_00299145.9;CON_00293665.7		1350.73	444083464	0	0.01778	High	3.20491	3.09843	3.26024	High	2.97485	High	3.35278	2.85221	1	321196424	486795719	179723664	228521248	1.19402e+08	High	High	High
	SGFSSISVSR	10	2	2	CON_00299145.9;CON_00293665.7		1026.52	1073862800	0	0.0002531	High	2.73295	1.81268	2.04615	High	1.92989	High	1.72602	1.98184	0	497873150	1242228221	402635852	597774241	211664506	High	High	High
	RTAAENEFVTLK	15	6	4	CON_IPI00290857.2;CON_00300725.7;CON_00299145.9;CON_00293665.7		1378.73	3.80351e+08	0	0.06509	High	3.52149	3.44464	3.36353	High	3.56962	High	2.99393	3.25194	1	197724322	447114100	1.51767e+08	228439430	113794218	High	High	High
	RISIGGGSCAISGGYGSR	19	3	3	CON_00300725.7;CON_00299145.9;CON_00293665.7	C9(Carbamidomethyl)	1754.86	682358410	0	1.88e-06	High	5.1794	4.09998	3.94604	High	3.78573	High	4.75146	3.83027	1	7.27666e+08	1.34576e+09	5.9028e+08	810787119	65295760	High	High	High
	AIGGGLSSVGGGSSTIK	15	2	2	CON_00300725.7;CON_00299145.9		1447.78	2771394082	0	0.000583	High	3.27246	4.01089	3.1658	High	4.24665	High	3.52138	3.42882	0	1341062064	3090280294	9.12435e+08	1310108690	6.3915e+08	High	High	High
	EYQELMNVK	4	16	7	CON_00300725.7;CON_IPI00554648.3;CON_00299145.9;CON_00293665.7;CON_00221797.1;XBXL10_1g8291;XBXL10_1g8295		1153.56	194084114	0	0.002238	High	1.61892	1.86282	1.70218	High		High			0	8.51266e+07	123591687	0	0	0
	FASFIDK	17	52	24	CON_IPI00290857.2;CON_00300725.7;CON_IPI00554648.3;CON_IPI00306959.10;CON_00009867.3;CON_00299145.9;CON_IPI00174775.2;XBXL10_1g8291;CON_105456;CON_IPI00290078.5;CON_00021304.1;CON_00293665.7;CON_00697851.1;CON_00221797.1;CON_00347096.2;CON_00462140.1;CON_00622240.4;CON_IPI00376379.3;CON_IPI00241841.9;CON_00705721.2;XBXL10_1g8295;XBXL10_1g8290;XBXL10_1g10877;XBXL10_1g8289		827.43	20889928652	0	0.01631	High	1.92991	1.93893	1.85944	High	1.86668	High	1.68189	1.85885	0	16666804464	18271764520	10620704572	15494635570	1.1965e+10	High	High	High
	ISIGGGSCAISGGYGSR	21	3	3	CON_00300725.7;CON_00299145.9;CON_00293665.7	C8(Carbamidomethyl)	1598.76	1.43898e+09	0	1.512e-07	High	3.65091	4.25623	3.52389	High	3.62503	High	3.82382	3.3314	0	907932519	1848272038	771375594	1428965870	3.64978e+08	High	High	High
	NMQDLVEDLK	9	2	2	CON_00299145.9;CON_00293665.7	M2(Oxidation)	1220.58	0	0	3.258e-05	High	2.70505	2.68337	2.77161	High	2.40664	High	2.60085	2.52844	0	37516558	5.68854e+07	5.19114e+07	47973540	0	High	High	High
	TAAENEFVTLK	18	6	4	CON_IPI00290857.2;CON_00300725.7;CON_00299145.9;CON_00293665.7		1222.63	1130548512	0	4.239e-05	High	3.11487	2.98119	3.07404	High	3.02891	High	2.94193	2.912	0	785780310	1098318642	7.231e+08	1143254363	506500205	High	High	High
	NKLEGLEDALQK	24	3	3	CON_00300725.7;CON_00299145.9;CON_00293665.7		1357.73	1423836375	0	4.337e-05	High	4.32425	4.33688	4.65492	High	4.24187	High	4.21047	4.07096	1	1225160792	1617122293	682757240	690023804	4.74783e+08	High	High	High
	LEGLEDALQK	10	4	3	CON_00300725.7;CON_00299145.9;CON_00293665.7		1115.59	199631096	0	0.009565	High	2.65968	2.66756	2.60308	High	2.57997	High	2.70129	2.2925	0	135054020	2.55346e+08	2.0631e+08	1.85841e+08	1.22664e+08	High	High	High
	WTLLQEQGTK	19	5	4	CON_00300725.7;CON_00009867.3;CON_00299145.9;CON_00293665.7		1203.64	4445052518	0	0.01498	High	3.01157	3.03325	2.95757	High	3.24042	High	2.92818	2.9151	0	1718076312	2162713873	1553295237	2206260552	1342408721	High	High	High
	LALDVEIATYRK	187	19	10	CON_IPI00290857.2;CON_00300725.7;CON_00009867.3;CON_00299145.9;CON_00021304.1;CON_00293665.7;CON_00697851.1;CON_00221797.1;CON_IPI00241841.9;XBXL10_1g8291		1391.79	7597148856	0	0.001571	High	3.94584	3.84747	3.93288	High	3.94186	High	3.85479	3.99987	1	10426772410	1.11043e+10	5.15464e+09	5.4941e+09	2.00012e+09	High	High	High
	VLDTKWTLLQEQGTK	23	4	3	CON_00009867.3;CON_00299145.9;CON_00293665.7		1759.96	1375720222	0	1.399e-08	High	5.12866	5.08817	5.17295	High	4.92489	High	4.87401	4.82868	1	2611947685	3444634064	1.21572e+09	1.41943e+09	478851728	High	High	High
	ALYDAELSQMQTHISDTSVVLSMDNNR	8	3	3	CON_00300725.7;CON_00299145.9;CON_00293665.7	M10(Oxidation); M23(Oxidation)	3070.41	287146710	0	0.0006898	High	5.99677	4.77975	5.91265	High	5.71136	High	6.06864	5.04287	0	237116368	396304423	252352702	259433286	1.5814e+08	High	High	High
	NMQDLVEDLK	1	2	2	CON_00299145.9;CON_00293665.7		1204.59	139818612	0	0.0002853	High	2.54231								0	0	0	0	0	0
	LALDVEIATYR	54	25	10	CON_IPI00290857.2;CON_00300725.7;CON_00009867.3;CON_00299145.9;CON_00021304.1;CON_00293665.7;CON_00697851.1;CON_00221797.1;CON_IPI00241841.9;XBXL10_1g8291		1263.69	790710142	0	0.004243	High	2.71855	2.46588	2.97101	High	2.82559	High	2.99738	2.61927	0	862913883	1289158834	604167874	741664298	61439000	High	High	High
	ADTLTDEINFLR	23	3	3	CON_00300725.7;CON_00299145.9;CON_00293665.7		1407.71	4646570240	0	0.0001059	High	3.55966	3.45211	3.31655	High	3.42396	High	3.33967	3.39733	0	3065284954	4559123686	2112508828	2954638220	1537015768	High	High	High
	ALYDAELSQMQTHISDTSVVLSMDNNR	1	3	3	CON_00300725.7;CON_00299145.9;CON_00293665.7	M23(Oxidation)	3054.41	72467527	0	5.002e-12	High	6.15443								0	0	0	0	0	0
	ALYDAELSQMQTHISDTSVVLSMDNNR	8	3	3	CON_00300725.7;CON_00299145.9;CON_00293665.7		3038.41	1.60392e+08	0	1.39e-12	High	6.97792	6.11444	6.16549	High	5.09134	High	6.09472	4.08361	0	6.14688e+07	88170945	2.42366e+07	36769346	9480271	High	High	High
	TVRQNLEPLFEQYINNLRR	32	6	4	CON_00300725.7;CON_00009867.3;CON_00299145.9;CON_00293665.7		2403.29	3.61363e+08	0	1.745e-06	High	4.68463	4.74764	4.95277	High	4.74959	High	4.63683	4.84498	2	2.50674e+09	2.97021e+09	1.40584e+09	1.14716e+09	189524944	High	High	High
	NLDLDSIIAEVK	56	12	6	CON_00300725.7;CON_00009867.3;CON_00299145.9;CON_00021304.1;CON_00293665.7;CON_IPI00241841.9		1329.73	2.43282e+10	0	8.066e-05	High	3.6254	3.80636	3.56252	High	3.37938	High	3.49304	3.63853	0	18561122123	18008597792	12312209872	17810070764	13152456286	High	High	High
	QNLEPLFEQYINNLRR	35	6	4	CON_00300725.7;CON_00009867.3;CON_00299145.9;CON_00293665.7		2047.07	1.12678e+10	0	5.019e-07	High	3.78767	3.77555	3.96856	High	3.7642	High	3.68824	3.61107	1	8440353877	8.35546e+09	5405363809	6.6502e+09	3.96181e+09	High	High	High
	TVRQNLEPLFEQYINNLR	12	6	4	CON_00300725.7;CON_00009867.3;CON_00299145.9;CON_00293665.7		2247.19	108496706	0	3.095e-10	High	5.89559	6.52355	6.211	High	6.20957	High	5.11734	4.26018	1	261402776	1.68082e+08	156326393	1.15567e+08	2.96027e+07	High	High	High
	QNLEPLFEQYINNLR	13	6	4	CON_00300725.7;CON_00009867.3;CON_00299145.9;CON_00293665.7		1890.97	5.97673e+08	0	2.055e-07	High	5.22226	5.42338	4.50692	High	4.33635	High	4.54563	4.5208	0	247353959	2.58665e+08	2.54467e+08	391453792	236695307	High	High	High
	RGFSANSARLPGVSR	5	2	2	CON_00300725.7;CON_00299145.9		1574.85	0	0	0.0008777			3.40826	4.23958	High		High			2	243013728	4.18557e+08	0	0	0
	QLDSIVGERGRLDSELR	8	4	4	CON_00300725.7;CON_00009867.3;CON_00299145.9;CON_00293665.7		1943.03	0	0	0.07368			3.23454	2.77146	High	2.834	High	2.6761	1.87122	2	2.00845e+08	363981015	130330700	79639370	9.77852e+06	High	High	High
	QCASLQAAIADAEQR	2	1	1	CON_00299145.9	C2(Carbamidomethyl)	1631.78	0	0	5.783e-05				3.46302			High	2.87042		0	0	28684707	0	20886106	0		High
	QCASLQAAIADAEQRGEMALK	1	1	1	CON_00299145.9	C2(Carbamidomethyl); M18(Oxidation)	2277.1	0	0	1.798e-05				3.54485			High			1	0	2.45243e+07	0	0	0
	GRLDSELRNMQDLVEDLK	1	2	2	CON_00299145.9;CON_00293665.7		2131.08	0	0	0.0007903				2.47505			High			2	0	39823078	0	0	0
	NLDLDSIIAEVKAQYEEIAQR	1	6	4	CON_00300725.7;CON_00299145.9;CON_00021304.1;CON_00293665.7		2418.25	0	0	3.829e-06				4.70292			High			1	0	9.25825e+06	0	0	0
	SEIDHVK	2	6	3	CON_00300725.7;CON_00299145.9;CON_00293665.7		827.427	1.67379e+07	0.001	0.03243	High	1.50134	1.40069		High					0	1.45703e+07	0	0	0	0
	DVDAAYMNK	5	17	9	CON_00300725.7;CON_00009867.3;CON_00299145.9;CON_00293665.7;CON_00697851.1;CON_00347096.2;XBXL10_1g8295;XBXL10_1g10877;XBXL10_1g8289		1026.46	26988723	0.001	0.02178	High	2.37871	2.25432	2.07008	High		High			0	7.86591e+07	7.80196e+07	0	0	0
	KDVDAAYMNK	3	17	9	CON_00300725.7;CON_00009867.3;CON_00299145.9;CON_00293665.7;CON_00697851.1;CON_00347096.2;XBXL10_1g8295;XBXL10_1g10877;XBXL10_1g8289	M8(Oxidation)	1170.55	1.53614e+07	0.001	0.1331	High	2.37656		2.76285		2.48312	High			1	0	8.95907e+06	4.68799e+06	0	0	High
	GFSANSAR	4	2	2	CON_00300725.7;CON_00299145.9		809.39	2.06022e+08	0.001	0.02441	High	1.5799	1.39069	1.43548	High		High	1.37619		0	82614670	1.56738e+08	0	80253383	0		High
	GRLDSELR	12	10	6	CON_00300725.7;CON_00009867.3;CON_00299145.9;CON_00293665.7;CON_00697851.1;CON_IPI00241841.9		945.511	2470876328	0.001	0.03713	High	2.35241	2.29886	2.33427	High	2.29137	High	2.30828	2.29604	1	1298220822	1.34737e+09	7.7889e+08	1213129136	1.13014e+09	High	High	High
	AKQDLARLLK	1	3	3	CON_00300725.7;CON_00299145.9;CON_00293665.7		1155.72	0	0.002	0.206						2.21636				2	0	0	65535808	0	0	High
	VRAEEREQIK	3	4	3	CON_00300725.7;CON_00299145.9;CON_00293665.7		1257.69	653105402	0.005	0.1713	High	2.92098								2	0	0	0	0	0
CON_00697851.1	SWISS-PROT:Q5XQN5 (Bos taurus) Keratin, type II cytoskeletal 5	49.25	6	1	50	1115	4.20244e+10	3.61978e+10	3.69485e+10	24167621996	2.977e+10	2.25649e+10	481.569	45.59	46	190	488.065	40.6	43	195	581.34	391.218	408.528	329.22	44.09	39.77	40.6	35.77	45	44	42	40	242	174	178	136	601	62.8983	7.81104
	Sequence	# PSMs	# Proteins	# Protein Groups	Protein Group Accessions	Modifications	MH+ [Da]	A5: Area	q-Value	PEP	A6	XCorr A6	XCorr B6	XCorr C6	B6	XCorr D6	C6	XCorr E6	XCorr F6	# Missed Cleavages	B5: Area	C5: Area	D5: Area	E5: Area	F5: Area	D6	E6	F6
	NTKHEISEMNR	2	3	2	CON_00009867.3;CON_00697851.1	M9(Oxidation)	1374.64	1.07732e+07	0	2.801e-05	High	2.81512	2.61974		High					1	1.48475e+07	0	0	0	0
	VRTEEREQIK	4	10	4	CON_00009867.3;CON_IPI00290078.5;CON_00697851.1;XBXL10_1g8289		1287.7	1.11258e+09	0	0.0009758	High	2.63507	2.72889		High					2	912494684	0	0	0	0
	SGGGGGGGFGR	6	2	2	CON_00009867.3;CON_00697851.1		865.391	2.48808e+08	0	0.0004374	High	3.17118	3.17495		High			2.15832		0	381838664	0	0	7.73816e+06	0		High
	SEIDNVKK	16	3	2	CON_00220327.3;CON_00697851.1		932.505	573335073	0	0.0158	High	2.05785	2.12691	1.85018	High	1.4397	High	1.79102	1.67905	1	578118019	293011004	40405782	1.72636e+08	3.57161e+07	High	High	High
	DVDAAYMNK	17	17	9	CON_00300725.7;CON_00009867.3;CON_00299145.9;CON_00293665.7;CON_00697851.1;CON_00347096.2;XBXL10_1g8295;XBXL10_1g10877;XBXL10_1g8289	M7(Oxidation)	1042.45	4.54973e+08	0	0.01374	High	2.28545	2.07945	1.8674	High	1.86932	High	1.87188	1.84209	0	436285162	489644663	4.8687e+08	382987610	2.59906e+08	High	High	High
	NKYEDEINKR	50	20	11	CON_00300725.7;CON_IPI00554648.3;CON_00009867.3;CON_00299145.9;CON_00220327.3;CON_00293665.7;CON_00697851.1;CON_00462140.1;XBXL10_1g8295;XBXL10_1g8289;XBXL10_1g8291		1308.65	8020872852	0	0.01025	High	3.70003	3.46323	3.76139	High	3.93702	High	3.90545	3.5984	2	4453363553	4.38948e+09	3.29655e+09	4871622639	4.18404e+09	High	High	High
	FVSTTSSSR	5	4	2	CON_00009867.3;CON_00697851.1		971.478	2.97898e+07	0	0.0002947	High	1.70534		1.80804		1.4416	High	1.56592	1.76348	0	0	48382153	1.49555e+07	3.98281e+07	1.38183e+07	High	High	High
	LRSEIDNVKK	37	3	2	CON_00220327.3;CON_00697851.1		1201.69	18827221618	0	0.001361	High	3.79915	3.60334	3.54317	High	3.61861	High	3.67646	3.6095	2	13976914201	16801516652	8.04086e+09	8053436556	9752364284	High	High	High
	HEISEMNR	6	3	2	CON_00009867.3;CON_00697851.1		1015.46	89333981	0	0.03735	High	2.2504	2.24961	2.17183	High	2.05853	High	1.89131	2.43327	0	5.63162e+07	4.52659e+07	9.1464e+06	5.33053e+06	2.13643e+07	High	High	High
	YEDEINKR	24	40	19	CON_IPI00290857.2;CON_00300725.7;CON_IPI00554648.3;CON_00009867.3;CON_00299145.9;CON_00220327.3;CON_00021304.1;CON_00293665.7;CON_00697851.1;CON_00221797.1;CON_00462140.1;CON_00622240.4;CON_IPI00376379.3;XBXL10_1g8295;XBXL10_1g8289;XBXL10_1g8291;XBXL10_1g10877;XBXL10_1g10870;XBXL10_1g10871		1066.52	6456119504	0	0.008032	High	1.96031	1.94761	1.86407	High	1.85402	High	1.82619	1.92686	1	4.07321e+09	3694448402	4304846388	4.86375e+09	3934580898	High	High	High
	FLEQQNK	21	50	20	CON_IPI00290857.2;CON_107456;CON_00300725.7;CON_IPI00554648.3;CON_IPI00306959.10;CON_00009867.3;CON_00299145.9;CON_106456;CON_105456;CON_00166205.2;CON_00293665.7;CON_00697851.1;CON_00124800.2;CON_00221797.1;CON_IPI00241841.9;XBXL10_1g8290;XBXL10_1g8291;XBXL10_1g10877;XBXL10_1g10870;XBXL10_1g10871		906.468	2.22081e+09	0	0.1134	High	1.69707	1.73364	1.60086	High	1.57643	High	1.55466	1.64136	0	1627774338	1836262672	1.19747e+09	1.94041e+09	1.03942e+09	High	High	High
	YEDEINK	32	43	20	CON_IPI00290857.2;CON_00300725.7;CON_IPI00554648.3;CON_00009867.3;CON_00299145.9;XBXL10_1g8291;CON_00220327.3;CON_00021304.1;CON_00293665.7;CON_00697851.1;CON_00221797.1;CON_00462140.1;CON_00622240.4;CON_IPI00376379.3;CON_IPI00241841.9;XBXL10_1g8295;XBXL10_1g8289;XBXL10_1g10877;XBXL10_1g10870;XBXL10_1g10871		910.416	15922380192	0	0.01896	High	2.1327	2.12545	1.91357	High	1.77495	High	1.92556	1.81321	0	8.65848e+09	11362991318	9786637980	9.7915e+09	9.50114e+09	High	High	High
	KLLEGEECR	19	27	11	CON_00300725.7;CON_00009867.3;CON_00299145.9;CON_IPI00174775.2;CON_00021304.1;CON_00293665.7;CON_00697851.1;CON_00221797.1;CON_00622240.4;XBXL10_1g10877;XBXL10_1g8289	C8(Carbamidomethyl)	1133.56	1.51246e+08	0	0.01377	High	2.70506	2.74776	2.88956	High	2.74487	High	2.70547	2.45344	1	1.94911e+08	197230801	1.65718e+08	2.6809e+08	1.23714e+08	High	High	High
	NKYEDEINK	25	23	12	CON_00300725.7;CON_IPI00554648.3;CON_00009867.3;CON_00299145.9;XBXL10_1g8291;CON_00220327.3;CON_00293665.7;CON_00697851.1;CON_00462140.1;CON_IPI00241841.9;XBXL10_1g8295;XBXL10_1g8289		1152.55	3188012410	0	0.08708	High	3.33727	3.50497	3.04553	High	3.26906	High	3.60094	3.18381	1	1.64644e+09	1.84262e+09	1.13915e+09	1.44402e+09	1.59798e+09	High	High	High
	LRSEIDNVK	17	3	2	CON_00220327.3;CON_00697851.1		1073.59	1.22838e+10	0	0.01514	High	2.4891	2.54887	2.52926	High	2.47714	High	2.70042	2.50258	1	8409085148	9584389345	4896020106	6023954212	6552342288	High	High	High
	LLEGEECR	21	28	12	CON_00300725.7;CON_00009867.3;CON_00299145.9;CON_IPI00174775.2;CON_00166205.2;CON_00021304.1;CON_00293665.7;CON_00697851.1;CON_00221797.1;CON_00622240.4;XBXL10_1g10877;XBXL10_1g8289	C7(Carbamidomethyl)	1005.47	5.60345e+09	0	0.02935	High	2.10841	2.09917	2.11088	High	2.11073	High	2.11532	2.10963	0	5.59857e+09	5.17908e+09	3.26645e+09	4.908e+09	2.35489e+09	High	High	High
	EYQELMNTK	15	3	2	CON_00009867.3;CON_00697851.1	M6(Oxidation)	1171.53	122068978	0	0.0006147	High	2.04342	1.92278	1.63273	High	1.80448	High	1.81523	1.85321	0	7.31669e+07	8.40388e+07	7.01577e+07	8.24561e+07	5.99636e+07	High	High	High
	TSFTSVSR	8	2	2	CON_00009867.3;CON_00697851.1		884.447	6.53524e+08	0	0.005997	High	2.29585	2.04798	1.87281	High	1.81416	High	1.89599		0	4.22596e+08	7.03468e+08	3.13194e+08	414327667	0	High	High
	YEELQQTAGR	16	3	2	CON_00009867.3;CON_00697851.1		1194.58	3.35109e+09	0	5.534e-05	High	2.48386	2.53631	2.60707	High	2.52741	High	2.4315	2.45322	0	2.76133e+09	2914674639	2.02161e+09	2754052558	2080594471	High	High	High
	VRFLEQQNK	22	50	20	CON_IPI00290857.2;CON_107456;CON_00300725.7;CON_IPI00554648.3;CON_IPI00306959.10;CON_00009867.3;CON_00299145.9;CON_106456;CON_105456;CON_00166205.2;CON_00293665.7;CON_00697851.1;CON_00124800.2;CON_00221797.1;CON_IPI00241841.9;XBXL10_1g8290;XBXL10_1g8291;XBXL10_1g10877;XBXL10_1g10870;XBXL10_1g10871		1161.64	4228717839	0	0.01767	High	2.65454	2.71945	2.56823	High	2.672	High	2.65601	2.5828	1	3.39655e+09	4087371328	2.19974e+09	2.78177e+09	1985595236	High	High	High
	SLYNLGGSKR	13	2	2	CON_00009867.3;CON_00697851.1		1094.6	226196128	0	0.008749	High	2.3453	2.17645	2.3205	High	2.08736	High	2.14386	2.16281	1	226642102	4.00501e+08	191201024	186074235	170706425	High	High	High
	SRTEAESWYQTK	24	3	2	CON_00009867.3;CON_00697851.1		1485.7	1563605896	0	0.1057	High	3.82751	3.85121	3.48627	High	3.76182	High	4.06399	3.80249	1	1235793151	1.41509e+09	1114670974	9.55624e+08	1123849692	High	High	High
	RTTAENEFVMLKK	12	3	2	CON_00009867.3;CON_00697851.1	M10(Oxidation)	1582.83	8.68035e+08	0	0.1233	High	5.19383	5.16039	4.85273	High	5.25048	High	3.83508	5.35799	2	4.60784e+08	5.74577e+08	3.19617e+08	2.03171e+08	294696740	High	High	High
	EYQELMNTK	1	3	2	CON_00009867.3;CON_00697851.1		1155.53	76044337	0	0.0003416	High	1.8536								0	0	0	0	0	0
	SLYNLGGSK	23	2	2	CON_00009867.3;CON_00697851.1		938.494	234146577	0	0.05681	High	1.64118	1.88457	1.82977	High	1.62814	High	2.11074	1.72156	0	137259956	214482504	193857620	145787492	0	High	High	High
	TEAESWYQTK	18	3	2	CON_00009867.3;CON_00697851.1		1242.56	952773458	0	0.0001732	High	3.054	3.03973	2.46625	High	2.79348	High	2.87335	3.00467	0	749887444	1095755544	467703820	1070984034	475082707	High	High	High
	NMQDLVEDFK	18	4	3	CON_00009867.3;CON_00697851.1;XBXL10_1g8295		1238.57	1001515408	0	0.03755	High	2.10005	2.15572	2.28028	High	2.53518	High	2.15592	2.40442	0	2.91896e+08	249506646	112400502	69246822	146201068	High	High	High
	RTTAENEFVMLKK	1	3	2	CON_00009867.3;CON_00697851.1		1566.83	0	0	0.002453	High	3.13484								2	0	0	0	0	0
	TTAENEFVMLKK	21	3	2	CON_00009867.3;CON_00697851.1	M9(Oxidation)	1426.72	852501330	0	0.002895	High	3.7978	3.70915	3.99419	High	3.76182	High	3.57902	3.65215	1	6.1766e+08	521400210	488018035	3.58311e+08	392644858	High	High	High
	LLREYQELMNTK	33	3	2	CON_00009867.3;CON_00697851.1	M9(Oxidation)	1553.8	422416920	0	0.02351	High	4.62471	4.6757	4.69558	High	4.47392	High	4.71251	4.77977	1	482958314	552768984	394212057	321774069	329604072	High	High	High
	RTTAENEFVMLK	15	3	2	CON_00009867.3;CON_00697851.1	M10(Oxidation)	1454.73	471082920	0	0.001564	High	4.24608	4.20376	3.57284	High	3.86205	High	3.6754	3.96731	1	2.06319e+08	249616858	248552781	218957832	2.1888e+08	High	High	High
	FASFIDK	17	52	24	CON_IPI00290857.2;CON_00300725.7;CON_IPI00554648.3;CON_IPI00306959.10;CON_00009867.3;CON_00299145.9;CON_IPI00174775.2;XBXL10_1g8291;CON_105456;CON_IPI00290078.5;CON_00021304.1;CON_00293665.7;CON_00697851.1;CON_00221797.1;CON_00347096.2;CON_00462140.1;CON_00622240.4;CON_IPI00376379.3;CON_IPI00241841.9;CON_00705721.2;XBXL10_1g8295;XBXL10_1g8290;XBXL10_1g10877;XBXL10_1g8289		827.43	20889928652	0	0.01631	High	1.92991	1.93893	1.85944	High	1.86668	High	1.68189	1.85885	0	16666804464	18271764520	10620704572	15494635570	1.1965e+10	High	High	High
	SFSTASAITPSVSR	13	2	2	CON_00009867.3;CON_00697851.1		1410.72	0	0	1.118e-05	High	3.73708	2.627	2.82744	High	2.54869	High	3.50224	3.05378	0	159002232	830332208	233250206	277380096	242860568	High	High	High
	KQCANLQNAIADAEQR	11	2	2	CON_00009867.3;CON_00697851.1	C3(Carbamidomethyl)	1829.89	81839640	0	0.001384	High	4.07254	4.36718	3.5776	High	4.59902	High	4.81262	4.08594	1	61947690	83136484	178757803	194302041	92370768	High	High	High
	TTAENEFVMLK	16	3	2	CON_00009867.3;CON_00697851.1	M9(Oxidation)	1298.63	1.16635e+09	0	0.0005171	High	2.64	2.98641	2.52806	High	2.60313	High	2.64905	2.84414	0	8.55156e+08	8.68514e+08	8.98869e+08	9.49764e+08	7.36693e+08	High	High	High
	NMQDLVEDFK	12	4	3	CON_00009867.3;CON_00697851.1;XBXL10_1g8295	M2(Oxidation)	1254.57	596293356	0	0.0009092	High	2.4763	2.108	2.15883	High	2.14614	High	2.2108	2.25548	0	299876727	2.29043e+08	368237404	299824058	348842148	High	High	High
	GRLDSELRNMQDLVEDFK	16	2	2	CON_00009867.3;CON_00697851.1		2165.07	67552481	0	1.309e-05	High	2.17055	3.19472	3.76234	High	2.36972	High	2.54129	2.27523	2	204829278	402446662	70030818	1.67703e+08	38028484	High	High	High
	LLREYQELMNTK	14	3	2	CON_00009867.3;CON_00697851.1		1537.8	7.46244e+08	0	7.783e-05	High	4.40466	3.98506	4.12039	High	4.05223	High	3.82057	4.06475	1	313382776	3.74364e+08	1.15056e+08	8.83159e+07	1.232e+08	High	High	High
	QCANLQNAIADAEQR	18	2	2	CON_00009867.3;CON_00697851.1	C2(Carbamidomethyl)	1701.8	421545853	0	2.471e-06	High	4.73922	4.94623	4.65663	High	4.80911	High	4.4885	4.35437	0	3.96021e+08	450003601	451581718	612215058	4.06448e+08	High	High	High
	TTAENEFVMLK	6	3	2	CON_00009867.3;CON_00697851.1		1282.64	167173765	0	0.0001861	High	2.82754	2.62058	2.69397	High	2.05513	High	2.10029	2.20117	0	0	3.00315e+07	20720306	1.55226e+07	0	High	High	High
	VDALMDEINFMK	16	3	2	CON_00009867.3;CON_00697851.1	M5(Oxidation); M11(Oxidation)	1457.67	1081649325	0	9.057e-06	High	3.51502	3.43801	3.39334	High	3.42292	High	3.12219	3.36306	0	814317868	842914886	899916655	6.49229e+08	614752254	High	High	High
	LALDVEIATYRK	187	19	10	CON_IPI00290857.2;CON_00300725.7;CON_00009867.3;CON_00299145.9;CON_00021304.1;CON_00293665.7;CON_00697851.1;CON_00221797.1;CON_IPI00241841.9;XBXL10_1g8291		1391.79	7597148856	0	0.001571	High	3.94584	3.84747	3.93288	High	3.94186	High	3.85479	3.99987	1	10426772410	1.11043e+10	5.15464e+09	5.4941e+09	2.00012e+09	High	High	High
	LDSELRNMQDLVEDFK	6	2	2	CON_00009867.3;CON_00697851.1	M8(Oxidation)	1967.94	51496403	0	0.04067	High	3.06516		3.50545		4.66004	High	2.99728	2.89674	1	0	4.44285e+07	8.82875e+07	54401576	41216647	High	High	High
	GRLDSELRNMQDLVEDFK	23	2	2	CON_00009867.3;CON_00697851.1	M10(Oxidation)	2181.06	158566998	0	0.0269	High	3.74151	3.57119	3.74222	High	3.48834	High	3.74771	3.23077	2	2.17218e+08	268002917	194246085	129149201	88898484	High	High	High
	MFFDAELSQMQTHVSDTSVVLSMDNNR	1	3	2	CON_00009867.3;CON_00697851.1	M1(Oxidation); M10(Oxidation); M23(Oxidation)	3150.38	0	0	7.28e-11	High	5.21866								0	0	0	0	0	0
	LALDVEIATYR	54	25	10	CON_IPI00290857.2;CON_00300725.7;CON_00009867.3;CON_00299145.9;CON_00021304.1;CON_00293665.7;CON_00697851.1;CON_00221797.1;CON_IPI00241841.9;XBXL10_1g8291		1263.69	790710142	0	0.004243	High	2.71855	2.46588	2.97101	High	2.82559	High	2.99738	2.61927	0	862913883	1289158834	604167874	741664298	61439000	High	High	High
	SLDLDSIIAEVK	84	6	3	CON_00220327.3;CON_00697851.1;CON_00221797.1		1302.72	86356172768	0	0.007808	High	3.26903	3.30278	3.2772	High	3.08912	High	3.41431	3.07351	0	7.79496e+10	75772109644	52095523436	64023846599	4.59773e+10	High	High	High
	KQCANLQNAIADAEQRGELALK	5	2	2	CON_00009867.3;CON_00697851.1	C3(Carbamidomethyl)	2441.25	469044406	0	3.607e-06	High	1.0807		6.87926		5.32015	High		4.82775	2	0	323629492	1.0086e+08	0	140942649	High		High
	QCANLQNAIADAEQRGELALK	17	2	2	CON_00009867.3;CON_00697851.1	C2(Carbamidomethyl)	2313.16	3.85245e+09	0	0.009073	High	7.19594	7.20201	7.00998	High	7.17457	High	7.21631	7.17381	1	2865041509	2570126368	855340080	8.42901e+08	1.08585e+09	High	High	High
	VDALMDEINFMK	6	3	2	CON_00009867.3;CON_00697851.1		1425.68	201282387	0	6.732e-06	High	2.83766	2.86055	2.70164	High	2.62623	High	2.73449	2.75285	0	5.47767e+07	62106074	2.63152e+07	2.23372e+07	10348532	High	High	High
	MFFDAELSQMQTHVSDTSVVLSMDNNR	2	3	2	CON_00009867.3;CON_00697851.1	M1(Oxidation)	3118.39	3.80311e+07	0	9.623e-09	High	4.20756		3.24576			High			0	0	0	0	0	0
	LDSELRNMQDLVEDFK	6	2	2	CON_00009867.3;CON_00697851.1		1951.94	0	0	7.877e-05			1.45263	3.75055	High	1.75482	High	1.4007		1	0	40855359	30154270	4.63692e+07	0	High	High
	VELEAKVDALMDEINFMK	2	2	2	CON_00009867.3;CON_00697851.1	M11(Oxidation); M17(Oxidation)	2127.04	0	0	2.33e-07			5.17994	5.58173	High		High			1	7.69996e+07	7.51019e+07	0	0	0
	HGDDLRNTKHEISEMNR	1	3	2	CON_00009867.3;CON_00697851.1	M15(Oxidation)	2067.96	0	0	0.009446				2.65408			High			2	0	5.57633e+06	0	0	0
	LAELEDALQK	3	1	1	CON_00697851.1		1129.61	0	0	0.02972						1.75061		2.32942		0	0	0	0	2.48261e+07	0	High	High
	DVDAAYMNK	5	17	9	CON_00300725.7;CON_00009867.3;CON_00299145.9;CON_00293665.7;CON_00697851.1;CON_00347096.2;XBXL10_1g8295;XBXL10_1g10877;XBXL10_1g8289		1026.46	26988723	0.001	0.02178	High	2.37871	2.25432	2.07008	High		High			0	7.86591e+07	7.80196e+07	0	0	0
	KDVDAAYMNK	3	17	9	CON_00300725.7;CON_00009867.3;CON_00299145.9;CON_00293665.7;CON_00697851.1;CON_00347096.2;XBXL10_1g8295;XBXL10_1g10877;XBXL10_1g8289	M8(Oxidation)	1170.55	1.53614e+07	0.001	0.1331	High	2.37656		2.76285		2.48312	High			1	0	8.95907e+06	4.68799e+06	0	0	High
	SEIDNVK	13	3	2	CON_00220327.3;CON_00697851.1		804.41	1.68102e+09	0.001	0.03001	High	1.59318	1.34598	1.38246	High	1.31107	High	1.45681	1.30518	0	1.40412e+09	1.23689e+09	1.06946e+09	1.43281e+09	1.06399e+09	High	High	High
	GRLDSELR	12	10	6	CON_00300725.7;CON_00009867.3;CON_00299145.9;CON_00293665.7;CON_00697851.1;CON_IPI00241841.9		945.511	2470876328	0.001	0.03713	High	2.35241	2.29886	2.33427	High	2.29137	High	2.30828	2.29604	1	1298220822	1.34737e+09	7.7889e+08	1213129136	1.13014e+09	High	High	High
	VDALMDEINFMK	1	3	2	CON_00009867.3;CON_00697851.1	M11(Oxidation)	1441.67	86307092	0.001	0.02266	High	1.19858								0	0	0	0	0	0
	MFFDAELSQMQTHVSDTSVVLSMDNNR	1	3	2	CON_00009867.3;CON_00697851.1	M10(Oxidation); M23(Oxidation)	3134.39	0	0.001	0.02455	High	2.39162								0	0	0	0	0	0
	YEELQQTAGRHGDDLR	1	3	2	CON_00009867.3;CON_00697851.1		1887.89	0	0.004	0.2569						1.13938				1	0	0	9220070	0	0	High
	HEISEMNR	1	3	2	CON_00009867.3;CON_00697851.1	M6(Oxidation)	1031.46	0	0.006	0.1122			1.84954		High					0	3.21889e+07	0	0	0	0
CON_Trypsin	Trypsin - Sus scrofa (Pig). - [SWISS-PROT:P00761|TRYP_PIG]	56.28	4	11	12	970	320947649112	2.86112e+11	3.36385e+11	3.38491e+11	2.27505e+11	265105060457	667.495	54.55	10	178	437.254	56.28	11	121	401.261	467.324	560.843	749.44	52.81	46.32	40.69	52.81	10	9	10	11	116	151	170	234	231	24.3938	7.18115
	Sequence	# PSMs	# Proteins	# Protein Groups	Protein Group Accessions	Modifications	MH+ [Da]	A5: Area	q-Value	PEP	A6	XCorr A6	XCorr B6	XCorr C6	B6	XCorr D6	C6	XCorr E6	XCorr F6	# Missed Cleavages	B5: Area	C5: Area	D5: Area	E5: Area	F5: Area	D6	E6	F6
	NKPGVYTK	3	5	2	CON_IPI00011694.1;CON_Trypsin		906.504	30532090	0	0.009536	High	1.52302	1.65745		High			1.37535		0	4.21143e+07	0	0	1.25124e+07	0		High
	LSSPATLNSR	120	1	1	CON_Trypsin		1045.56	285854348784	0	0.06984	High	2.27414	2.27312	2.24338	High	2.21064	High	2.28216	2.42691	0	214124300832	281308339280	296100827008	255699637224	201177801060	High	High	High
	VATVSLPR	290	1	1	CON_Trypsin		842.509	312583438584	0	0.08716	High	2.14421	2.13787	2.05914	High	2.13662	High	2.10568	2.19138	0	140331171840	278491420608	284376402200	106197562368	203985359807	High	High	High
	LSSPATLNSRVATVSLPR	9	1	1	CON_Trypsin		1869.06	1.8543e+07	0	0.001338	High	2.69878	4.08177	2.82488	High	2.96978	High	2.4851	2.83704	1	80870745	68528759	1.62841e+08	7.88872e+07	188616860	High	High	High
	LGEHNIDVLEGNEQFINAAK	396	1	1	CON_Trypsin		2211.1	364405159968	0	3.301e-11	High	7.74841	7.21343	6.76313	High	6.76923	High	6.61911	7.11481	0	503880368672	449355640760	434994877808	320618288536	390152020504	High	High	High
	APVLSDSSCKSSYPGQITGNMICVGFLEGGK	6	1	1	CON_Trypsin	C9(Carbamidomethyl); M21(Oxidation); C23(Carbamidomethyl)	3275.54	525974632	0	0.01075	High	2.6416	2.77309	2.50969	High	2.45148	High		1.87927	1	142880416	0	0	0	5.16462e+08	High		High
	IITHPNFNGNTLDNDIMLIK	60	1	1	CON_Trypsin	M17(Oxidation)	2299.18	63156051684	0	0.003905	High	6.96022	6.05017	6.84449	High	7.07955	High	7.02095	6.23894	0	47132315908	42606354756	39139677724	49869111064	48620425349	High	High	High
	SSGSSYPSLLQCLK	7	1	1	CON_Trypsin	C12(Carbamidomethyl)	1526.75	1.08308e+08	0	0.005321	High	2.81082	2.94642	2.79487	High	2.67965	High	3.07797	3.06992	0	2.08655e+07	89118152	3.28553e+07	134156647	143225454	High	High	High
	IITHPNFNGNTLDNDIMLIK	44	1	1	CON_Trypsin		2283.18	103273031344	0	2.282e-08	High	7.70986	6.63334	6.24334	High	6.70043	High	6.24027	7.42379	0	48607741764	43093493928	35929283152	46385379878	25007673126	High	High	High
	IITHPNFNGNTLDNDIMLIKLSSPATLNSR	7	1	1	CON_Trypsin	M17(Oxidation)	3325.72	7.629e+07	0	0.0001161	High	3.5105	4.59471	3.7362	High		High	4.60908	3.42768	1	0	0	0	0	0		High	High
	VCNYVNWIQQTIAAN	4	1	1	CON_Trypsin	C2(Carbamidomethyl)	1793.87	3.37737e+08	0	0.01293	High	2.19037	2.61587	3.60385	High		High		3.53182	0	0	2.7081e+08	0	0	251573044			High
	IQVRLGEHNIDVLEGNEQFINAAK	18	1	1	CON_Trypsin		2707.42	0	0	0.0005548			7.44781	7.1662	High	8.10538	High	7.39247	6.69894	1	982211642	1010870830	924248470	6.04622e+08	2.48834e+08	High	High	High
	APVLSDSSCK	6	1	1	CON_Trypsin	C9(Carbamidomethyl)	1063.51	0	0	0.01146						1.82423		2.5744	1.86516	0	0	0	0	4.51986e+07	3.22403e+07	High	High	High
CON_00384444.5	SWISS-PROT:P02533 Tax_Id=9606 Gene_Symbol=KRT14 Keratin, type I cytoskeletal 14	78.39	7	16	55	942	5.29415e+10	3.66443e+10	31192104230	2.33473e+10	32290389445	2.80268e+10	514.092	78.39	47	169	458.315	78.39	51	149	567.995	437.409	423.044	374.285	75	76.48	71.19	71.19	52	47	45	42	188	153	144	139	472	51.5894	5.16064
	Sequence	# PSMs	# Proteins	# Protein Groups	Protein Group Accessions	Modifications	MH+ [Da]	A5: Area	q-Value	PEP	A6	XCorr A6	XCorr B6	XCorr C6	B6	XCorr D6	C6	XCorr E6	XCorr F6	# Missed Cleavages	B5: Area	C5: Area	D5: Area	E5: Area	F5: Area	D6	E6	F6
	VTMQNLNDR	17	13	8	CON_00217963.3;CON_IPI00328103.3;CON_00009865.2;CON_00384444.5;CON_00225378.3;CON_00798492.2;CON_IPI00418663.3;CON_00721270.3		1090.53	5634536621	0	0.002585	High	2.50245	1.92185	1.60108	High	1.64844	High	1.60811	2.01421	0	1152129504	1267228872	5.87505e+08	4.8586e+08	688406706	High	High	High
	VTMQNLNDR	25	13	8	CON_00217963.3;CON_IPI00328103.3;CON_00009865.2;CON_00384444.5;CON_00225378.3;CON_00798492.2;CON_IPI00418663.3;CON_00721270.3	M3(Oxidation)	1106.53	9863111330	0	0.08074	High	2.58102	2.61568	2.62295	High	2.64169	High	2.63705	2.64844	0	4699302517	2.20081e+09	3878612658	4334721004	5118874086	High	High	High
	QFTSSSSMK	2	4	2	CON_00217963.3;CON_00384444.5	M8(Oxidation)	1018.45	18689238	0	0.0005251	High	2.12391	2.09816		High					0	2.66608e+07	0	0	0	0
	KNHEEEMNALR	6	7	3	CON_00450768.7;CON_00384444.5;XBXL10_1g38935	M7(Oxidation)	1386.64	6.00146e+07	0	0.0002643	High	3.31732	3.6536	3.32371	High	3.20565	High	3.42261	3.04212	1	5.26827e+07	4.73528e+07	2.98723e+07	4.24643e+07	1.11034e+07	High	High	High
	CEMEQQNQEYK	9	6	3	CON_00450768.7;CON_00384444.5;CON_00721270.3	C1(Carbamidomethyl); M3(Oxidation)	1502.59	6.59166e+07	0	3.858e-05	High	3.49125	2.70787	2.79145	High	3.07505	High	2.94681	2.9254	0	6.20437e+07	3.94536e+07	37025405	4.01501e+07	25956512	High	High	High
	NHEEEMNALR	14	8	3	CON_00450768.7;CON_00384444.5;XBXL10_1g38935	M6(Oxidation)	1258.55	1.49538e+08	0	0.07441	High	3.08979	2.55516	2.7843	High	2.81738	High	2.56288	2.70661	0	1.20112e+08	120809590	6.39366e+07	1.36109e+08	100701520	High	High	High
	QFTSSSSMK	1	4	2	CON_00217963.3;CON_00384444.5		1002.46	1.75472e+07	0	0.002145	High	1.96681								0	0	0	0	0	0
	TIEDLRNK	8	5	3	CON_00217963.3;CON_00384444.5;CON_00721270.3		988.542	390834240	0	0.08052	High	1.68752	1.7444	1.74498	High	1.72831	High	1.69141	1.77357	1	723747156	9.64835e+08	4.201e+08	554285288	201869994	High	High	High
	CEMEQQNQEYK	3	6	3	CON_00450768.7;CON_00384444.5;CON_00721270.3	C1(Carbamidomethyl)	1486.59	6.07689e+07	0	1.609e-06	High	2.88725	2.68561	2.50998	High		High			0	1.44672e+07	1.16908e+07	0	0	0
	VVSTHEQVLR	14	1	1	CON_00384444.5		1167.65	2.4513e+08	0	0.0001782	High	2.65253	2.41087	2.15429	High	2.48679	High	2.61844	1.99571	0	1.14681e+08	240471522	1.06592e+08	1.61732e+08	8.01003e+07	High	High	High
	ILNEMRDQYEK	15	5	3	CON_00450768.7;CON_00384444.5;CON_00721270.3	M5(Oxidation)	1454.69	7.27559e+08	0	0.0001969	High	2.82542	2.95847	3.26268	High	2.70124	High	2.1688	2.31919	1	5.78753e+08	6.77585e+08	531252420	4.39427e+08	3.53693e+08	High	High	High
	SEISELRR	12	4	3	CON_00450768.7;CON_00384444.5;CON_00721270.3		989.538	1457996750	0	0.007153	High	2.08125	2.10278	1.92316	High	1.97719	High	1.88434	2.10592	1	1030321554	1.4564e+09	817612389	1000001931	847421018	High	High	High
	GSCGIGGGIGGGSSR	14	2	2	CON_00217963.3;CON_00384444.5	C3(Carbamidomethyl)	1278.59	1973709156	0	0.01217	High	2.96138	3.20137	3.01214	High	3.16106	High	2.99541	3.65972	0	1398534848	2.11722e+09	930073677	1.65257e+09	497582058	High	High	High
	EVATNSELVQSGK	12	4	3	CON_00450768.7;CON_00384444.5;CON_00721270.3		1361.69	1693396508	0	1.588e-05	High	2.94184	3.75316	3.69504	High	2.9594	High	3.0863	3.24244	0	955744456	1.00064e+09	9.444e+08	1439483624	954137884	High	High	High
	SEISELR	7	4	3	CON_00450768.7;CON_00384444.5;CON_00721270.3		833.436	76631145	0	0.006075	High	1.96073	1.62101	1.57137	High	1.4305	High	1.67034	1.60264	0	91417938	124249002	106518486	166373652	94586434	High	High	High
	LASYLDK	48	25	13	CON_00217963.3;CON_00450768.7;CON_00009865.2;CON_00019359.3;CON_00384444.5;CON_00136056.1;CON_00225378.3;CON_IPI00290077.1;CON_00721270.3;CON_00912554.1;XBXL10_1g38958;XBXL10_1g38951;XBXL10_1g38957		809.44	60787022168	0	0.1013	High	2.05419	2.15733	1.9115	High	1.9521	High	2.09405	1.9971	0	42043828040	38071526344	2.88528e+10	39374069632	34696907176	High	High	High
	LEQEIATYRR	6	14	5	CON_00217963.3;CON_00450768.7;CON_00384444.5;CON_00721270.3;XBXL10_1g38935		1278.68	148048139	0	0.08137	High	2.7668	2.63498	2.99809	High	2.29553	High	2.89685	2.63635	1	63819251	8.15858e+07	50302320	6.65017e+07	82391197	High	High	High
	EELAYLKK	8	10	3	CON_00450768.7;CON_00384444.5;XBXL10_1g38935		993.561	402707842	0	0.09072	High	2.34101	2.15478	2.22874	High	2.15905	High	2.20928	2.44893	1	233433546	320164884	164492149	157132416	1.80928e+08	High	High	High
	ISSVLAGGSCR	16	3	3	CON_00217963.3;CON_00384444.5;CON_00721270.3	C10(Carbamidomethyl)	1106.56	2015089620	0	0.024	High	3.62451	3.07095	3.37183	High	3.52932	High	3.08642	3.79861	0	1.31746e+09	2215512407	9.31632e+08	1.9005e+09	621449592	High	High	High
	LAADDFR	34	52	18	CON_00217963.3;CON_00450768.7;CON_109456;CON_00009865.2;CON_00136056.1;CON_00798492.2;CON_00912554.1;CON_18266793;CON_00384444.5;CON_00225378.3;CON_IPI00290077.1;CON_00721270.3;CON_IPI00418663.3;CON_00698285.3;CON_00708921.1;XBXL10_1g8279;XBXL10_1g38935;XBXL10_1g42200		807.4	8.7171e+10	0	0.01073	High	1.85348	2.01395	1.96806	High	1.91594	High	1.85693	1.89971	0	5.03039e+10	41248418266	2.78356e+10	45688204091	43680490412	High	High	High
	ILNEMRDQYEK	17	5	3	CON_00450768.7;CON_00384444.5;CON_00721270.3		1438.7	6.37206e+08	0	2.095e-06	High	3.93103	2.90363	2.94084	High	2.63355	High	2.22224	2.44767	1	206409528	282013133	6.4059e+07	20707177	60234039	High	High	High
	APSTYGGGLSVSSSR	20	1	1	CON_00384444.5		1425.69	4625371216	0	1.507e-07	High	4.42787	3.94548	3.76532	High	3.80653	High	4.01215	3.72133	0	2747003720	3923943664	1736882506	2237444304	1336694594	High	High	High
	TKYETELNLR	17	4	2	CON_00384444.5;CON_00721270.3		1266.67	3116469958	0	0.001612	High	2.2427	2.69939	2.72517	High	1.8783	High	2.51454	1.97014	1	1973261504	2193753598	512906096	1339196390	695307328	High	High	High
	ASLENSLEETK	18	5	3	CON_00217963.3;CON_00384444.5;CON_00721270.3		1220.6	5860047876	0	0.0001795	High	2.82151	3.20162	2.79451	High	2.89442	High	2.73565	2.74368	0	4181403214	5099982200	2825746254	3694265216	2637553320	High	High	High
	TRLEQEIATYRR	16	14	5	CON_00217963.3;CON_00450768.7;CON_00384444.5;CON_00721270.3;XBXL10_1g38935		1535.83	5360875508	0	4.615e-06	High	5.23982	4.68044	4.17144	High	4.95308	High	4.15104	4.01963	2	4590374967	6196387286	2.98292e+09	3.70068e+09	2761370082	High	High	High
	EELAYLK	13	11	3	CON_00450768.7;CON_00384444.5;XBXL10_1g38935		865.467	2276185328	0	0.08454	High	2.05766	1.89413	1.83881	High	1.89492	High	1.80916	1.84277	0	1338807688	1935215167	1060952919	1295393709	1.24839e+09	High	High	High
	ALEEANADLEVK	33	7	5	CON_00217963.3;CON_00384444.5;CON_00009866.6;CON_IPI00290077.1;CON_00721270.3		1301.66	3053539544	0	0.0002548	High	3.52351	2.84749	2.62275	High	2.27355	High	2.5089	2.87565	0	2060038760	2550206166	1525985722	2524907224	1692786076	High	High	High
	RLLEGEDAHLSSSQFSSGSQSSR	12	3	2	CON_00384444.5;CON_00721270.3		2465.16	504968750	0	9.952e-08	High	6.16745	5.48272	5.72199	High	5.41261	High	4.62836	4.95989	1	297600803	3.35893e+08	282403669	3.10109e+08	264858036	High	High	High
	YETELNLR	12	4	2	CON_00384444.5;CON_00721270.3		1037.53	1304490685	0	0.1258	High	1.79338	2.08179	1.78825	High	1.86719	High	2.00241	2.16591	0	823736320	1.39044e+09	5.83833e+08	512315633	6.93952e+08	High	High	High
	TEELNREVATNSELVQSGK	25	4	3	CON_00450768.7;CON_00384444.5;CON_00721270.3		2104.05	4219083504	0	2.92e-09	High	6.57605	7.27471	7.24982	High	6.60557	High	6.94401	6.9722	1	3.13357e+09	4.30981e+09	2.42114e+09	2.74222e+09	2242850828	High	High	High
	MSVEADINGLRR	20	5	1	CON_00384444.5	M1(Oxidation)	1376.69	594575312	0	0.05022	High	2.85591	2.91724	2.70588	High	3.14395	High	3.25863	3.02005	1	480578224	952966272	448007952	330778848	474811568	High	High	High
	VRALEEANADLEVK	64	7	5	CON_00217963.3;CON_00384444.5;CON_00009866.6;CON_IPI00290077.1;CON_00721270.3		1556.83	1586539280	0	5.459e-05	High	4.77381	4.24671	5.43379	High	4.52334	High	4.4115	4.69009	1	1157383422	1.7632e+09	8.99133e+08	1024539101	829468411	High	High	High
	LLEGEDAHLSSSQFSSGSQSSRDVTSSSR	10	1	1	CON_00384444.5		3041.4	78217509	0	5.902e-10	High	5.03448	5.35212	5.69878	High	4.79739	High	4.10333	3.353	1	100650336	2.70271e+08	8.80439e+07	4.19017e+07	2.78371e+07	High	High	High
	DYSPYFK	16	7	3	CON_00217963.3;CON_00384444.5;CON_00721270.3		919.419	4307080760	0	0.01386	High	1.32592	1.35485	1.15119	High	1.37494	High	1.32111	1.31355	0	3.03103e+09	4020577270	2160723872	2.91161e+09	2.16598e+09	High	High	High
	LLEGEDAHLSSSQFSSGSQSSR	22	3	2	CON_00384444.5;CON_00721270.3		2309.06	3235399480	0	5.023e-10	High	6.15903	6.38718	5.73366	High	5.54443	High	5.66463	5.61746	0	1649189493	2.23224e+09	1313336722	1.89063e+09	1546654034	High	High	High
	TRLEQEIATYR	22	19	9	CON_00217963.3;CON_00450768.7;CON_00384444.5;CON_00009866.6;CON_00136056.1;CON_00225378.3;CON_00721270.3;CON_IPI00290077.1;XBXL10_1g38935		1379.73	1895963698	0	0.0001588	High	4.46062	4.10304	4.32152	High	4.24209	High	3.89115	3.79536	1	1458997956	1569007143	7.96164e+08	1.35596e+09	791539982	High	High	High
	MSVEADINGLR	9	5	1	CON_00384444.5	M1(Oxidation)	1220.59	1.01371e+08	0	0.00144	High	2.84969	2.97665	2.88247	High	2.51022	High	2.72324	2.56	0	0	0	0	0	8.13285e+07	High	High	High
	MSVEADINGLRR	11	5	1	CON_00384444.5		1360.7	728070030	0	0.001263	High	3.1388	2.95007	2.87523	High	2.0636	High	2.08917	2.10504	1	237212276	314771937	6.03258e+07	51382091	137467449	High	High	High
	RVLDELTLAR	15	14	6	CON_00217963.3;CON_00450768.7;CON_00384444.5;CON_00225378.3;CON_IPI00290077.1;CON_00721270.3		1185.69	3.32415e+08	0	0.00283	High	2.81234	3.01723	3.01004	High	2.4572	High	2.87055	2.75138	1	2.11266e+08	3.69018e+08	196917080	2.01938e+08	1.74467e+08	High	High	High
	GQVGGDVNVEMDAAPGVDLSR	25	4	2	CON_00384444.5;CON_00721270.3	M11(Oxidation)	2101.98	365830476	0	2.225e-05	High	5.12639	4.9304	4.25264	High	5.43452	High	5.04896	4.58968	0	2.48145e+08	340770301	2.94006e+08	2.80891e+08	1.87832e+08	High	High	High
	NHEEEMNALRGQVGGDVNVEMDAAPGVDLSR	6	3	1	CON_00384444.5	M6(Oxidation); M21(Oxidation)	3341.51	7.79849e+07	0	6.632e-09	High	6.82702	6.68224	6.17967	High	6.1164	High	5.58764		1	26648185	111216336	9.32929e+07	0	0	High	High
	VLDELTLAR	19	14	6	CON_00217963.3;CON_00450768.7;CON_00384444.5;CON_00225378.3;CON_IPI00290077.1;CON_00721270.3		1029.59	9.08887e+09	0	0.1014	High	2.44533	2.46618	2.45823	High	2.44914	High	2.76987	2.39104	0	5199572502	7.76205e+09	3174930880	4330476940	3.89393e+09	High	High	High
	MSVEADINGLR	2	5	1	CON_00384444.5		1204.6	27318287	0	7.107e-05	High	2.6395		2.30382			High			0	0	0	0	0	0
	VTMQNLNDRLASYLDK	26	5	5	CON_00217963.3;CON_00009865.2;CON_00384444.5;CON_00225378.3;CON_00721270.3	M3(Oxidation)	1896.95	10866599204	0	0.03647	High	5.28652	5.36713	5.22662	High	5.49288	High	5.6209	4.51143	1	1.75853e+10	14256368080	1.33535e+10	11808894612	5.70307e+09	High	High	High
	ADLEMQIESLK	8	3	2	CON_00384444.5;CON_00721270.3	M5(Oxidation)	1292.64	680375678	0	0.002807	High	2.7708	2.96472	2.76769	High	2.41086	High	3.11952	2.74417	0	312074017	497067217	3.78123e+08	264815326	390344112	High	High	High
	ADLEMQIESLK	1	3	2	CON_00384444.5;CON_00721270.3		1276.64	317529740	0	8.636e-06	High	3.26471								0	0	0	0	0	0
	TMQNLEIELQSQLSMK	13	1	1	CON_00384444.5	M2(Oxidation); M15(Oxidation)	1924.93	144607680	0	1.232e-06	High	4.55846	4.58845	5.39735	High	4.78258	High	4.55659	4.02884	0	54815580	186033241	111110138	99350324	2.37362e+07	High	High	High
	VTMQNLNDRLASYLDK	22	5	5	CON_00217963.3;CON_00009865.2;CON_00384444.5;CON_00225378.3;CON_00721270.3		1880.95	6.49601e+09	0	7.766e-09	High	5.50291	5.73839	5.8316	High	4.66761	High	5.77971	4.47141	1	5467592780	6922246172	2446756519	3915193791	8.40131e+08	High	High	High
	DAEEWFFTK	18	2	1	CON_00384444.5		1172.53	3.34886e+09	0	0.0553	High	2.42242	2.42319	2.43624	High	2.70288	High	2.92071	2.51915	0	2.4955e+09	2.78794e+09	1883511060	2.43545e+09	2029768241	High	High	High
	TMQNLEIELQSQLSMK	8	1	1	CON_00384444.5	M15(Oxidation)	1908.94	1.32086e+08	0	2.082e-06	High	3.94165	3.5279	3.42768	High	3.68869	High	3.19938	3.17776	0	6.17722e+07	6.43237e+07	2.47564e+07	4.35911e+07	1.89967e+07	High	High	High
	ILTATVDNANVLLQIDNAR	92	1	1	CON_00384444.5		2054.12	3.00774e+09	0	5.215e-05	High	5.69367	5.37452	5.21764	High	5.21053	High	5.73891	5.46229	0	2688530496	3028985800	1525078636	1.69992e+09	1.04984e+09	High	High	High
	TMQNLEIELQSQLSMK	2	1	1	CON_00384444.5		1892.95	44915502	0	1.773e-05	High	2.70345								0	0	0	0	0	0
	GRYCMQLAQIQEMIGSVEEQLAQLR	6	1	1	CON_00384444.5	C4(Carbamidomethyl); M5(Oxidation); M13(Oxidation)	2983.44	64768731	0	1.075e-09	High	6.07826	6.99578	6.09049	High	5.8377	High			1	47350449	13005496	0	0	0	High
	YCMQLAQIQEMIGSVEEQLAQLR	4	1	1	CON_00384444.5	C2(Carbamidomethyl); M3(Oxidation); M11(Oxidation)	2770.32	2.24016e+07	0	1.647e-09	High	5.28341		5.63949			High			0	0	1.18665e+07	0	0	0
	LAADDFRTK	4	24	6	CON_00217963.3;CON_00450768.7;CON_109456;CON_00384444.5;CON_00721270.3;XBXL10_1g38935		1036.54	0	0	0.001575			1.27407	1.67138	High	1.47839	High			1	80396022	248306880	93327792	0	0	High
	ISSVLAGGSCRAPSTYGGGLSVSSSR	4	1	1	CON_00384444.5	C10(Carbamidomethyl)	2513.24	0	0	7.922e-09			5.36233	5.45033	High	4.84309	High	5.16997		1	8.06275e+07	227984179	90064214	134535795	0	High	High
	LAADDFRTKYETELNLR	3	4	2	CON_00384444.5;CON_00721270.3		2055.05	0	0	1.088e-05			5.04127	4.61975	High		High			2	107812128	207441246	0	0	0
	ADLEMQIESLKEELAYLKK	3	1	1	CON_00384444.5	M5(Oxidation)	2267.19	0	0	4.486e-07			5.07716	4.07393	High		High			2	32623028	1.70937e+07	0	0	0
	ADLEMQIESLKEELAYLK	4	1	1	CON_00384444.5	M5(Oxidation)	2139.09	0	0	9.293e-09			6.25381	5.27673	High		High			1	131425851	60149433	0	0	0
	RLLEGEDAHLSSSQFSSGSQSSRDVTSSSR	1	1	1	CON_00384444.5		3197.5	0	0	5.755e-09				3.70613			High			2	0	83148242	0	0	0
	ILTATVDNANVLLQIDNARLAADDFRTK	3	1	1	CON_00384444.5		3071.66	0	0	0.001431				4.01435		4.55293	High	3.31058		2	0	4.32944e+07	7.60435e+07	1.44557e+07	0	High	High
	VLDELTLARADLEMQIESLK	1	3	2	CON_00384444.5;CON_00721270.3	M14(Oxidation)	2303.21	0	0	6.096e-07				4.52346			High			1	0	0	0	0	0
	ILNEMR	8	8	4	CON_00217963.3;CON_00450768.7;CON_00384444.5;CON_00721270.3	M5(Oxidation)	791.407	7.59178e+07	0.002	0.1934	High	1.1178	0.931813	1.27956	High	1.18658	High	1.02107	1.04755	0	4.26425e+07	0	7.43976e+07	1.07041e+08	4.81487e+07	High	High	High
	IRDWYQR	13	6	4	CON_00217963.3;CON_00450768.7;CON_00384444.5;CON_00721270.3		1036.53	2.71729e+09	0.002	0.06085	High	2.31485	2.35329		High	2.22708		2.27788	2.4082	1	1629924146	0	1.56755e+09	1.82925e+09	1281146330	High	High	High
	TEELNR	2	9	3	CON_00450768.7;CON_00384444.5;CON_00721270.3		761.379	3.87293e+07	0.005	0.1799	High	1.51669	1.48482		High					0	55187484	0	0	0	0
	ILNEMR	1	8	4	CON_00217963.3;CON_00450768.7;CON_00384444.5;CON_00721270.3		775.413	0	0.005	0.1793	High	1.38675								0	0	0	0	0	0
XBXL10_1g8295	XBmRNA15675| krt7.L	14.62	5	2	12	811	2.01637e+10	1.94514e+10	2.08388e+10	1.21921e+10	1.33446e+10	8.83777e+09	358.644	11.11	10	145	341.543	10.92	9	142	354.561	329.407	332.587	252.419	11.11	11.11	12.48	12.87	10	10	10	10	146	137	134	107	513	55.3597	5.70654
	Sequence	# PSMs	# Proteins	# Protein Groups	Protein Group Accessions	Modifications	MH+ [Da]	A5: Area	q-Value	PEP	A6	XCorr A6	XCorr B6	XCorr C6	B6	XCorr D6	C6	XCorr E6	XCorr F6	# Missed Cleavages	B5: Area	C5: Area	D5: Area	E5: Area	F5: Area	D6	E6	F6
	DVDAAYMNK	17	17	9	CON_00300725.7;CON_00009867.3;CON_00299145.9;CON_00293665.7;CON_00697851.1;CON_00347096.2;XBXL10_1g8295;XBXL10_1g10877;XBXL10_1g8289	M7(Oxidation)	1042.45	4.54973e+08	0	0.01374	High	2.28545	2.07945	1.8674	High	1.86932	High	1.87188	1.84209	0	436285162	489644663	4.8687e+08	382987610	2.59906e+08	High	High	High
	NKYEDEINKR	50	20	11	CON_00300725.7;CON_IPI00554648.3;CON_00009867.3;CON_00299145.9;CON_00220327.3;CON_00293665.7;CON_00697851.1;CON_00462140.1;XBXL10_1g8295;XBXL10_1g8289;XBXL10_1g8291		1308.65	8020872852	0	0.01025	High	3.70003	3.46323	3.76139	High	3.93702	High	3.90545	3.5984	2	4453363553	4.38948e+09	3.29655e+09	4871622639	4.18404e+09	High	High	High
	YEDEINKR	24	40	19	CON_IPI00290857.2;CON_00300725.7;CON_IPI00554648.3;CON_00009867.3;CON_00299145.9;CON_00220327.3;CON_00021304.1;CON_00293665.7;CON_00697851.1;CON_00221797.1;CON_00462140.1;CON_00622240.4;CON_IPI00376379.3;XBXL10_1g8295;XBXL10_1g8289;XBXL10_1g8291;XBXL10_1g10877;XBXL10_1g10870;XBXL10_1g10871		1066.52	6456119504	0	0.008032	High	1.96031	1.94761	1.86407	High	1.85402	High	1.82619	1.92686	1	4.07321e+09	3694448402	4304846388	4.86375e+09	3934580898	High	High	High
	YEDEINK	32	43	20	CON_IPI00290857.2;CON_00300725.7;CON_IPI00554648.3;CON_00009867.3;CON_00299145.9;XBXL10_1g8291;CON_00220327.3;CON_00021304.1;CON_00293665.7;CON_00697851.1;CON_00221797.1;CON_00462140.1;CON_00622240.4;CON_IPI00376379.3;CON_IPI00241841.9;XBXL10_1g8295;XBXL10_1g8289;XBXL10_1g10877;XBXL10_1g10870;XBXL10_1g10871		910.416	15922380192	0	0.01896	High	2.1327	2.12545	1.91357	High	1.77495	High	1.92556	1.81321	0	8.65848e+09	11362991318	9786637980	9.7915e+09	9.50114e+09	High	High	High
	NKYEDEINK	25	23	12	CON_00300725.7;CON_IPI00554648.3;CON_00009867.3;CON_00299145.9;XBXL10_1g8291;CON_00220327.3;CON_00293665.7;CON_00697851.1;CON_00462140.1;CON_IPI00241841.9;XBXL10_1g8295;XBXL10_1g8289		1152.55	3188012410	0	0.08708	High	3.33727	3.50497	3.04553	High	3.26906	High	3.60094	3.18381	1	1.64644e+09	1.84262e+09	1.13915e+09	1.44402e+09	1.59798e+09	High	High	High
	EYQELMNVK	12	16	7	CON_00300725.7;CON_IPI00554648.3;CON_00299145.9;CON_00293665.7;CON_00221797.1;XBXL10_1g8291;XBXL10_1g8295	M6(Oxidation)	1169.55	3.00971e+08	0	0.01359	High	2.25551	2.14913	2.24799	High	2.18588	High	2.20179	2.24713	0	3.02686e+08	3.98298e+08	2.11778e+08	2.18878e+08	127182717	High	High	High
	NMQDLVEDFK	18	4	3	CON_00009867.3;CON_00697851.1;XBXL10_1g8295		1238.57	1001515408	0	0.03755	High	2.10005	2.15572	2.28028	High	2.53518	High	2.15592	2.40442	0	2.91896e+08	249506646	112400502	69246822	146201068	High	High	High
	EYQELMNVK	4	16	7	CON_00300725.7;CON_IPI00554648.3;CON_00299145.9;CON_00293665.7;CON_00221797.1;XBXL10_1g8291;XBXL10_1g8295		1153.56	194084114	0	0.002238	High	1.61892	1.86282	1.70218	High		High			0	8.51266e+07	123591687	0	0	0
	FASFIDK	17	52	24	CON_IPI00290857.2;CON_00300725.7;CON_IPI00554648.3;CON_IPI00306959.10;CON_00009867.3;CON_00299145.9;CON_IPI00174775.2;XBXL10_1g8291;CON_105456;CON_IPI00290078.5;CON_00021304.1;CON_00293665.7;CON_00697851.1;CON_00221797.1;CON_00347096.2;CON_00462140.1;CON_00622240.4;CON_IPI00376379.3;CON_IPI00241841.9;CON_00705721.2;XBXL10_1g8295;XBXL10_1g8290;XBXL10_1g10877;XBXL10_1g8289		827.43	20889928652	0	0.01631	High	1.92991	1.93893	1.85944	High	1.86668	High	1.68189	1.85885	0	16666804464	18271764520	10620704572	15494635570	1.1965e+10	High	High	High
	NMQDLVEDFK	12	4	3	CON_00009867.3;CON_00697851.1;XBXL10_1g8295	M2(Oxidation)	1254.57	596293356	0	0.0009092	High	2.4763	2.108	2.15883	High	2.14614	High	2.2108	2.25548	0	299876727	2.29043e+08	368237404	299824058	348842148	High	High	High
	LALDIEIATYR	590	20	7	CON_IPI00554648.3;CON_IPI00306959.10;CON_IPI00853265.1;CON_IPI00290078.5;XBXL10_1g8295;XBXL10_1g8290;CON_00220327.3		1277.71	23678860064	0	1.17e-05	High	3.45539	3.37493	3.64133	High	3.42751	High	3.5266	3.47466	0	33029031143	32881500665	16168910608	14747663527	5.04712e+09	High	High	High
	LAELEAALQK	1	4	1	XBXL10_1g8295		1085.62	0	0	0.02253									1.89115	0	0	0	0	0	2.2765e+07			High
	DVDAAYMNK	5	17	9	CON_00300725.7;CON_00009867.3;CON_00299145.9;CON_00293665.7;CON_00697851.1;CON_00347096.2;XBXL10_1g8295;XBXL10_1g10877;XBXL10_1g8289		1026.46	26988723	0.001	0.02178	High	2.37871	2.25432	2.07008	High		High			0	7.86591e+07	7.80196e+07	0	0	0
	KDVDAAYMNK	3	17	9	CON_00300725.7;CON_00009867.3;CON_00299145.9;CON_00293665.7;CON_00697851.1;CON_00347096.2;XBXL10_1g8295;XBXL10_1g10877;XBXL10_1g8289	M8(Oxidation)	1170.55	1.53614e+07	0.001	0.1331	High	2.37656		2.76285		2.48312	High			1	0	8.95907e+06	4.68799e+06	0	0	High
	LLEGEENR	1	1	1	XBXL10_1g8295		959.483	0	0.001	0.1396								1.13741		0	0	0	0	0	0		High
CON_IPI00554648.3	SWISS-PROT:P05787 Tax_Id=9606 Gene_Symbol=KRT8 Keratin, type II cytoskeletal 8	14.7	14	1	12	805	2.01637e+10	1.94514e+10	2.53324e+10	1.21921e+10	1.33446e+10	8.83777e+09	351.667	11.18	10	143	336.671	11.18	10	142	350.512	322.343	331.874	248.335	11.39	11.18	14.49	11.18	10	10	11	10	144	135	134	107	483	53.6711	5.59229
	Sequence	# PSMs	# Proteins	# Protein Groups	Protein Group Accessions	Modifications	MH+ [Da]	A5: Area	q-Value	PEP	A6	XCorr A6	XCorr B6	XCorr C6	B6	XCorr D6	C6	XCorr E6	XCorr F6	# Missed Cleavages	B5: Area	C5: Area	D5: Area	E5: Area	F5: Area	D6	E6	F6
	NKYEDEINKR	50	20	11	CON_00300725.7;CON_IPI00554648.3;CON_00009867.3;CON_00299145.9;CON_00220327.3;CON_00293665.7;CON_00697851.1;CON_00462140.1;XBXL10_1g8295;XBXL10_1g8289;XBXL10_1g8291		1308.65	8020872852	0	0.01025	High	3.70003	3.46323	3.76139	High	3.93702	High	3.90545	3.5984	2	4453363553	4.38948e+09	3.29655e+09	4871622639	4.18404e+09	High	High	High
	YEDEINKR	24	40	19	CON_IPI00290857.2;CON_00300725.7;CON_IPI00554648.3;CON_00009867.3;CON_00299145.9;CON_00220327.3;CON_00021304.1;CON_00293665.7;CON_00697851.1;CON_00221797.1;CON_00462140.1;CON_00622240.4;CON_IPI00376379.3;XBXL10_1g8295;XBXL10_1g8289;XBXL10_1g8291;XBXL10_1g10877;XBXL10_1g10870;XBXL10_1g10871		1066.52	6456119504	0	0.008032	High	1.96031	1.94761	1.86407	High	1.85402	High	1.82619	1.92686	1	4.07321e+09	3694448402	4304846388	4.86375e+09	3934580898	High	High	High
	FLEQQNK	21	50	20	CON_IPI00290857.2;CON_107456;CON_00300725.7;CON_IPI00554648.3;CON_IPI00306959.10;CON_00009867.3;CON_00299145.9;CON_106456;CON_105456;CON_00166205.2;CON_00293665.7;CON_00697851.1;CON_00124800.2;CON_00221797.1;CON_IPI00241841.9;XBXL10_1g8290;XBXL10_1g8291;XBXL10_1g10877;XBXL10_1g10870;XBXL10_1g10871		906.468	2.22081e+09	0	0.1134	High	1.69707	1.73364	1.60086	High	1.57643	High	1.55466	1.64136	0	1627774338	1836262672	1.19747e+09	1.94041e+09	1.03942e+09	High	High	High
	YEDEINK	32	43	20	CON_IPI00290857.2;CON_00300725.7;CON_IPI00554648.3;CON_00009867.3;CON_00299145.9;XBXL10_1g8291;CON_00220327.3;CON_00021304.1;CON_00293665.7;CON_00697851.1;CON_00221797.1;CON_00462140.1;CON_00622240.4;CON_IPI00376379.3;CON_IPI00241841.9;XBXL10_1g8295;XBXL10_1g8289;XBXL10_1g10877;XBXL10_1g10870;XBXL10_1g10871		910.416	15922380192	0	0.01896	High	2.1327	2.12545	1.91357	High	1.77495	High	1.92556	1.81321	0	8.65848e+09	11362991318	9786637980	9.7915e+09	9.50114e+09	High	High	High
	LLEGEESR	6	18	5	CON_IPI00554648.3;CON_IPI00306959.10;XBXL10_1g8291;CON_105456;XBXL10_1g8290		932.469	1.03513e+08	0	0.01057	High	1.68179	1.33761		High	1.55677		1.48566	1.36341	0	3.37854e+07	0	29940111	2.74826e+07	2.75728e+07	High	High	High
	NKYEDEINK	25	23	12	CON_00300725.7;CON_IPI00554648.3;CON_00009867.3;CON_00299145.9;XBXL10_1g8291;CON_00220327.3;CON_00293665.7;CON_00697851.1;CON_00462140.1;CON_IPI00241841.9;XBXL10_1g8295;XBXL10_1g8289		1152.55	3188012410	0	0.08708	High	3.33727	3.50497	3.04553	High	3.26906	High	3.60094	3.18381	1	1.64644e+09	1.84262e+09	1.13915e+09	1.44402e+09	1.59798e+09	High	High	High
	VRFLEQQNK	22	50	20	CON_IPI00290857.2;CON_107456;CON_00300725.7;CON_IPI00554648.3;CON_IPI00306959.10;CON_00009867.3;CON_00299145.9;CON_106456;CON_105456;CON_00166205.2;CON_00293665.7;CON_00697851.1;CON_00124800.2;CON_00221797.1;CON_IPI00241841.9;XBXL10_1g8290;XBXL10_1g8291;XBXL10_1g10877;XBXL10_1g10870;XBXL10_1g10871		1161.64	4228717839	0	0.01767	High	2.65454	2.71945	2.56823	High	2.672	High	2.65601	2.5828	1	3.39655e+09	4087371328	2.19974e+09	2.78177e+09	1985595236	High	High	High
	EYQELMNVK	12	16	7	CON_00300725.7;CON_IPI00554648.3;CON_00299145.9;CON_00293665.7;CON_00221797.1;XBXL10_1g8291;XBXL10_1g8295	M6(Oxidation)	1169.55	3.00971e+08	0	0.01359	High	2.25551	2.14913	2.24799	High	2.18588	High	2.20179	2.24713	0	3.02686e+08	3.98298e+08	2.11778e+08	2.18878e+08	127182717	High	High	High
	EYQELMNVK	4	16	7	CON_00300725.7;CON_IPI00554648.3;CON_00299145.9;CON_00293665.7;CON_00221797.1;XBXL10_1g8291;XBXL10_1g8295		1153.56	194084114	0	0.002238	High	1.61892	1.86282	1.70218	High		High			0	8.51266e+07	123591687	0	0	0
	FASFIDK	17	52	24	CON_IPI00290857.2;CON_00300725.7;CON_IPI00554648.3;CON_IPI00306959.10;CON_00009867.3;CON_00299145.9;CON_IPI00174775.2;XBXL10_1g8291;CON_105456;CON_IPI00290078.5;CON_00021304.1;CON_00293665.7;CON_00697851.1;CON_00221797.1;CON_00347096.2;CON_00462140.1;CON_00622240.4;CON_IPI00376379.3;CON_IPI00241841.9;CON_00705721.2;XBXL10_1g8295;XBXL10_1g8290;XBXL10_1g10877;XBXL10_1g8289		827.43	20889928652	0	0.01631	High	1.92991	1.93893	1.85944	High	1.86668	High	1.68189	1.85885	0	16666804464	18271764520	10620704572	15494635570	1.1965e+10	High	High	High
	LALDIEIATYR	590	20	7	CON_IPI00554648.3;CON_IPI00306959.10;CON_IPI00853265.1;CON_IPI00290078.5;XBXL10_1g8295;XBXL10_1g8290;CON_00220327.3		1277.71	23678860064	0	1.17e-05	High	3.45539	3.37493	3.64133	High	3.42751	High	3.5266	3.47466	0	33029031143	32881500665	16168910608	14747663527	5.04712e+09	High	High	High
	KLLEGEESR	1	16	4	CON_IPI00554648.3;CON_IPI00306959.10;XBXL10_1g8291;XBXL10_1g8290		1060.56	0	0	0.001803				1.6249			High			1	0	24843994094	0	0	0
	GQRASLEAAIADAEQR	1	2	1	CON_IPI00554648.3		1685.86	0	0.001	0.1187								2.29763		1	0	0	0	0	0		High
CON_IPI00290078.5	SWISS-PROT:P19013 Tax_Id=9606 Gene_Symbol=KRT4 keratin 4	53.54	4	23	31	714	19641113900	1.80681e+10	19170848213	10367400066	1.21455e+10	7.2918e+09	315.874	15.49	9	117	375.258	43.27	27	144	319.075	294.859	368.822	219.66	8.08	8.08	41.08	11.45	6	6	24	7	121	112	134	86	594	63.8714	8.25049
	Sequence	# PSMs	# Proteins	# Protein Groups	Protein Group Accessions	Modifications	MH+ [Da]	A5: Area	q-Value	PEP	A6	XCorr A6	XCorr B6	XCorr C6	B6	XCorr D6	C6	XCorr E6	XCorr F6	# Missed Cleavages	B5: Area	C5: Area	D5: Area	E5: Area	F5: Area	D6	E6	F6
	VRTEEREQIK	4	10	4	CON_00009867.3;CON_IPI00290078.5;CON_00697851.1;XBXL10_1g8289		1287.7	1.11258e+09	0	0.0009758	High	2.63507	2.72889		High					2	912494684	0	0	0	0
	SISMSVAGSR	3	1	1	CON_IPI00290078.5	M4(Oxidation)	1010.5	0	0	0.01151	High	1.60167	1.83788		High				1.20928	0	74377844	0	0	0	0			High
	AQYEEIAQR	22	10	5	CON_00300725.7;CON_00299145.9;CON_IPI00290078.5;CON_00021304.1;CON_00293665.7		1107.55	14354552984	0	0.002673	High	2.38185	2.37576	2.69249	High	2.4495	High	2.51956	2.42976	0	4508550546	6359279454	4312585018	6194303654	4863225296	High	High	High
	AEAEALYQTK	13	10	5	CON_IPI00290857.2;CON_IPI00174775.2;CON_IPI00290078.5;CON_00166205.2;CON_00705721.2		1123.56	23286805	0	0.03209	High	2.80561	2.72068	2.79598	High	2.76629	High	2.89807	2.80533	0	59566298	74189925	51375198	78841091	3.16885e+07	High	High	High
	VQFLEQQNK	6	1	1	CON_IPI00290078.5		1133.59	708191868	0	0.0006436	High	1.9254	2.09891	1.63492	High	1.74301	High	1.62377	1.63387	0	492526692	538677651	1.76828e+08	416532721	110788607	High	High	High
	FASFIDK	17	52	24	CON_IPI00290857.2;CON_00300725.7;CON_IPI00554648.3;CON_IPI00306959.10;CON_00009867.3;CON_00299145.9;CON_IPI00174775.2;XBXL10_1g8291;CON_105456;CON_IPI00290078.5;CON_00021304.1;CON_00293665.7;CON_00697851.1;CON_00221797.1;CON_00347096.2;CON_00462140.1;CON_00622240.4;CON_IPI00376379.3;CON_IPI00241841.9;CON_00705721.2;XBXL10_1g8295;XBXL10_1g8290;XBXL10_1g10877;XBXL10_1g8289		827.43	20889928652	0	0.01631	High	1.92991	1.93893	1.85944	High	1.86668	High	1.68189	1.85885	0	16666804464	18271764520	10620704572	15494635570	1.1965e+10	High	High	High
	LALDIEIATYR	590	20	7	CON_IPI00554648.3;CON_IPI00306959.10;CON_IPI00853265.1;CON_IPI00290078.5;XBXL10_1g8295;XBXL10_1g8290;CON_00220327.3		1277.71	23678860064	0	1.17e-05	High	3.45539	3.37493	3.64133	High	3.42751	High	3.5266	3.47466	0	33029031143	32881500665	16168910608	14747663527	5.04712e+09	High	High	High
	NLDLDSIIAEVR	5	4	2	CON_IPI00174775.2;CON_IPI00290078.5		1357.73	79968878	0	1.014e-05	High	2.8844	2.96906		High			2.73415	2.0859	0	129251228	0	0	91322324	9.35621e+06		High	High
	NLEPLFETYLSVLR	3	1	1	CON_IPI00290078.5		1693.92	1.48275e+07	0	0.0001035	High	3.08447	2.91854		High			2.53194		0	3.06242e+07	0	0	1.24114e+07	0		High
	CSSGGFGSR	1	3	1	CON_IPI00290078.5	C1(Carbamidomethyl)	914.379	0	0	0.0006658			2.41107		High					0	1.87723e+07	0	0	0	0
	TKYEEEINKR	2	2	1	CON_IPI00290078.5		1309.67	0	0	3.7e-05			3.04858		High			1.27394		2	5.50143e+07	0	0	5.69085e+07	0		High
	TKYEEEINK	2	2	1	CON_IPI00290078.5		1153.57	0	0	0.06979			2.15766		High			2.25795		1	2.55581e+07	0	0	2.70607e+07	0		High
	RGAFSSVSMSGGAGR	1	1	1	CON_IPI00290078.5	M9(Oxidation)	1442.68	0	0	0.003043			3.58064		High					1	1.06062e+07	0	0	0	0
	QLDTLGNDK	4	1	1	CON_IPI00290078.5		1003.51	0	0	0.07119			2.32722		High			2.46441		0	8.03149e+07	0	0	6.71941e+07	0		High
	AQYEEIAQRSK	7	5	2	CON_IPI00290078.5;CON_00021304.1		1322.67	0	0	0.02026			2.57847	2.37739	High	2.08119	High	2.59801		1	1.14751e+08	2.0524e+08	1.11042e+08	0	0	High	High
	SKAEAEALYQTK	1	9	4	CON_IPI00290857.2;CON_IPI00174775.2;CON_IPI00290078.5;CON_00705721.2		1338.69	0	0	0.006457			2.34216		High					1	4.43703e+07	0	0	0	0
	IISTTTLNK	4	1	1	CON_IPI00290078.5		990.583	0	0	0.02066			2.11527		High			2.17276		0	124821710	0	0	73414418	0		High
	SEIAELNR	3	1	1	CON_IPI00290078.5		931.483	0	0	0.01041			2.01812		High			1.96383		0	1.20275e+08	0	0	99330882	0		High
	LLEGEEYR	3	1	1	CON_IPI00290078.5		1008.5	0	0	0.008476			1.72821		High			1.55208		0	6.98015e+07	0	0	4.09359e+07	0		High
	DVDAAYLNK	2	2	1	CON_IPI00290078.5		1008.5	0	0	0.004787			2.26584		High			2.30402		0	0	0	0	0	0		High
	RVELEAALQQAK	3	1	1	CON_IPI00290078.5		1355.76	0	0	0.0002092			4.02711		High			4.00936		1	1.10829e+08	0	0	6.58025e+07	0		High
	VQQLQISVDQHGDNLK	2	1	1	CON_IPI00290078.5		1821.95	0	0	0.001392			1.494		High			4.12501		0	142741259	0	0	1.70063e+08	0		High
	WNLLQQQTTTTSSK	2	1	1	CON_IPI00290078.5		1635.83	0	0	0.0002709			2.31048		High			3.48868		0	3.80231e+07	0	0	58958023	0		High
	QCQTLQVSVADAEQRGENALK	1	1	1	CON_IPI00290078.5	C2(Carbamidomethyl)	2345.16	0	0	9.413e-07			6.50928		High					1	71302040	0	0	0	0
	VDSLNDEINFLK	3	1	1	CON_IPI00290078.5		1406.72	0	0	0.003439			2.40542		High			3.72096		0	223638820	0	0	193192527	0		High
	NLEPLFETYLSVLRK	5	1	1	CON_IPI00290078.5		1822.01	0	0	1.031e-05			4.64729		High			4.62085		1	205902051	0	0	142968097	0		High
	GFSCGSAIVGGGKR	1	1	1	CON_IPI00290078.5	C4(Carbamidomethyl)	1352.67	0	0	0.02407								3.8438		1	0	0	0	3.18873e+07	0		High
	GFSCGSAIVGGGK	1	1	1	CON_IPI00290078.5	C4(Carbamidomethyl)	1196.57	0	0	0.01165								2.25379		0	0	0	0	0	0		High
	TAAENDFVVLKK	1	2	1	CON_IPI00290078.5		1334.73	0	0	0.02244								1.9247		1	0	0	0	47452215	0		High
	LRAEIENIKK	1	2	1	CON_IPI00290078.5		1213.73	0	0.002	0.03701			3.11494		High					2	38055887	0	0	0	0
	GGPGFPVCPAGGIQEVTINQSLLTPLHVEIDPEIQK	1	1	1	CON_IPI00290078.5	C8(Carbamidomethyl)	3810.97	0	0.003	0.1956								3.6658		0	0	0	0	0	0		High
CON_00217963.3	SWISS-PROT:P08779 Tax_Id=9606 Gene_Symbol=KRT16 Keratin, type I cytoskeletal 16	69.56	4	25	46	706	5.29415e+10	3.66443e+10	31192104230	2.33473e+10	32290389445	2.80268e+10	346.89	66.81	35	125	293.06	69.56	40	110	380.926	297.66	314.02	262.132	66.17	65.33	67.65	64.69	43	38	40	34	136	114	117	104	473	51.2362	5.04639
	Sequence	# PSMs	# Proteins	# Protein Groups	Protein Group Accessions	Modifications	MH+ [Da]	A5: Area	q-Value	PEP	A6	XCorr A6	XCorr B6	XCorr C6	B6	XCorr D6	C6	XCorr E6	XCorr F6	# Missed Cleavages	B5: Area	C5: Area	D5: Area	E5: Area	F5: Area	D6	E6	F6
	VTMQNLNDR	17	13	8	CON_00217963.3;CON_IPI00328103.3;CON_00009865.2;CON_00384444.5;CON_00225378.3;CON_00798492.2;CON_IPI00418663.3;CON_00721270.3		1090.53	5634536621	0	0.002585	High	2.50245	1.92185	1.60108	High	1.64844	High	1.60811	2.01421	0	1152129504	1267228872	5.87505e+08	4.8586e+08	688406706	High	High	High
	VTMQNLNDR	25	13	8	CON_00217963.3;CON_IPI00328103.3;CON_00009865.2;CON_00384444.5;CON_00225378.3;CON_00798492.2;CON_IPI00418663.3;CON_00721270.3	M3(Oxidation)	1106.53	9863111330	0	0.08074	High	2.58102	2.61568	2.62295	High	2.64169	High	2.63705	2.64844	0	4699302517	2.20081e+09	3878612658	4334721004	5118874086	High	High	High
	QFTSSSSMK	2	4	2	CON_00217963.3;CON_00384444.5	M8(Oxidation)	1018.45	18689238	0	0.0005251	High	2.12391	2.09816		High					0	2.66608e+07	0	0	0	0
	QFTSSSSMK	1	4	2	CON_00217963.3;CON_00384444.5		1002.46	1.75472e+07	0	0.002145	High	1.96681								0	0	0	0	0	0
	EVFTSSSSSSSR	12	1	1	CON_00217963.3		1260.57	501357484	0	2.869e-05	High	2.45829	2.22371	2.1598	High	1.90171	High	2.31948	2.00457	0	1.75518e+08	5.34968e+08	1.44663e+08	214673926	1.3793e+08	High	High	High
	SEVTELRR	5	1	1	CON_00217963.3		989.538	4.63278e+08	0	0.01752	High	1.63301	1.67424	2.03532	High		High	2.02238		1	2.09549e+08	383396618	0	193243396	0		High
	TIEDLRNK	8	5	3	CON_00217963.3;CON_00384444.5;CON_00721270.3		988.542	390834240	0	0.08052	High	1.68752	1.7444	1.74498	High	1.72831	High	1.69141	1.77357	1	723747156	9.64835e+08	4.201e+08	554285288	201869994	High	High	High
	GSCGIGGGIGGGSSR	14	2	2	CON_00217963.3;CON_00384444.5	C3(Carbamidomethyl)	1278.59	1973709156	0	0.01217	High	2.96138	3.20137	3.01214	High	3.16106	High	2.99541	3.65972	0	1398534848	2.11722e+09	930073677	1.65257e+09	497582058	High	High	High
	EVASNSELVQSSR	12	1	1	CON_00217963.3		1405.69	1863426224	0	1.67e-06	High	2.78	2.73843	2.85807	High	2.64881	High	2.81539	2.73396	0	820786462	1514614324	582522484	1.06931e+09	509704152	High	High	High
	TKYEHELALR	19	1	1	CON_00217963.3		1259.67	8.38666e+08	0	3.659e-05	High	3.39795	3.00696	3.67196	High	3.23498	High	3.30801	3.0936	1	116429584	100257928	6.60966e+07	47302352	44876944	High	High	High
	LASYLDK	48	25	13	CON_00217963.3;CON_00450768.7;CON_00009865.2;CON_00019359.3;CON_00384444.5;CON_00136056.1;CON_00225378.3;CON_IPI00290077.1;CON_00721270.3;CON_00912554.1;XBXL10_1g38958;XBXL10_1g38951;XBXL10_1g38957		809.44	60787022168	0	0.1013	High	2.05419	2.15733	1.9115	High	1.9521	High	2.09405	1.9971	0	42043828040	38071526344	2.88528e+10	39374069632	34696907176	High	High	High
	ILNEMRDQYEQMAEK	13	3	1	CON_00217963.3	M5(Oxidation); M12(Oxidation)	1929.87	187361716	0	0.001949	High	2.11147	2.16478	2.01883	High	2.01288	High	1.94293	1.91075	1	1.86703e+08	285481533	152225124	105877984	0	High	High	High
	LEQEIATYRR	6	14	5	CON_00217963.3;CON_00450768.7;CON_00384444.5;CON_00721270.3;XBXL10_1g38935		1278.68	148048139	0	0.08137	High	2.7668	2.63498	2.99809	High	2.29553	High	2.89685	2.63635	1	63819251	8.15858e+07	50302320	6.65017e+07	82391197	High	High	High
	ISSVLAGGSCR	16	3	3	CON_00217963.3;CON_00384444.5;CON_00721270.3	C10(Carbamidomethyl)	1106.56	2015089620	0	0.024	High	3.62451	3.07095	3.37183	High	3.52932	High	3.08642	3.79861	0	1.31746e+09	2215512407	9.31632e+08	1.9005e+09	621449592	High	High	High
	YEHELALR	7	1	1	CON_00217963.3		1030.53	173370965	0	0.005971	High	2.33707	2.35737	1.98986	High	2.33288	High	1.96116	2.35304	0	5.74973e+07	128546200	4.68751e+07	7.59699e+07	41152212	High	High	High
	EELAYLRK	11	4	2	CON_00217963.3;CON_00721270.3		1021.57	811811760	0	0.102	High	2.38713	2.11407	2.40933	High	2.44063	High	2.25849	2.21448	1	3.47986e+08	1.24066e+09	512270533	5.53407e+08	381480713	High	High	High
	LAADDFR	34	52	18	CON_00217963.3;CON_00450768.7;CON_109456;CON_00009865.2;CON_00136056.1;CON_00798492.2;CON_00912554.1;CON_18266793;CON_00384444.5;CON_00225378.3;CON_IPI00290077.1;CON_00721270.3;CON_IPI00418663.3;CON_00698285.3;CON_00708921.1;XBXL10_1g8279;XBXL10_1g38935;XBXL10_1g42200		807.4	8.7171e+10	0	0.01073	High	1.85348	2.01395	1.96806	High	1.91594	High	1.85693	1.89971	0	5.03039e+10	41248418266	2.78356e+10	45688204091	43680490412	High	High	High
	QTVEADVNGLRR	17	1	1	CON_00217963.3		1357.72	1777356718	0	0.0001616	High	3.69116	3.58184	3.41408	High	2.9841	High	3.51763	3.23709	1	520530708	821363164	341141835	641149010	379002475	High	High	High
	APSTYGGGLSVSSR	13	1	1	CON_00217963.3		1338.66	861258020	0	0.02123	High	3.08005	3.01899	3.09112	High	3.26931	High	3.00484	2.69419	0	187483906	510877888	43426710	561781751	177838729	High	High	High
	ASLENSLEETK	18	5	3	CON_00217963.3;CON_00384444.5;CON_00721270.3		1220.6	5860047876	0	0.0001795	High	2.82151	3.20162	2.79451	High	2.89442	High	2.73565	2.74368	0	4181403214	5099982200	2825746254	3694265216	2637553320	High	High	High
	LLEGEDAHLSSQQASGQSYSSR	15	1	1	CON_00217963.3		2350.09	963634186	0	9.114e-13	High	5.51698	4.47758	4.57627	High	4.6817	High	4.83361	4.07098	0	2.78773e+08	761620934	2.49122e+08	485484064	302677147	High	High	High
	QTVEADVNGLR	6	1	1	CON_00217963.3		1201.62	195005090	0	0.0865	High	2.75579	2.61339	2.47863	High	2.55488	High	2.24474	2.8338	0	87284270	150661298	6.90834e+07	109583168	5.46253e+07	High	High	High
	TRLEQEIATYRR	16	14	5	CON_00217963.3;CON_00450768.7;CON_00384444.5;CON_00721270.3;XBXL10_1g38935		1535.83	5360875508	0	4.615e-06	High	5.23982	4.68044	4.17144	High	4.95308	High	4.15104	4.01963	2	4590374967	6196387286	2.98292e+09	3.70068e+09	2761370082	High	High	High
	ALEEANADLEVK	33	7	5	CON_00217963.3;CON_00384444.5;CON_00009866.6;CON_IPI00290077.1;CON_00721270.3		1301.66	3053539544	0	0.0002548	High	3.52351	2.84749	2.62275	High	2.27355	High	2.5089	2.87565	0	2060038760	2550206166	1525985722	2524907224	1692786076	High	High	High
	VRALEEANADLEVK	64	7	5	CON_00217963.3;CON_00384444.5;CON_00009866.6;CON_IPI00290077.1;CON_00721270.3		1556.83	1586539280	0	5.459e-05	High	4.77381	4.24671	5.43379	High	4.52334	High	4.4115	4.69009	1	1157383422	1.7632e+09	8.99133e+08	1024539101	829468411	High	High	High
	DYSPYFK	16	7	3	CON_00217963.3;CON_00384444.5;CON_00721270.3		919.419	4307080760	0	0.01386	High	1.32592	1.35485	1.15119	High	1.37494	High	1.32111	1.31355	0	3.03103e+09	4020577270	2160723872	2.91161e+09	2.16598e+09	High	High	High
	TRLEQEIATYR	22	19	9	CON_00217963.3;CON_00450768.7;CON_00384444.5;CON_00009866.6;CON_00136056.1;CON_00225378.3;CON_00721270.3;CON_IPI00290077.1;XBXL10_1g38935		1379.73	1895963698	0	0.0001588	High	4.46062	4.10304	4.32152	High	4.24209	High	3.89115	3.79536	1	1458997956	1569007143	7.96164e+08	1.35596e+09	791539982	High	High	High
	GQTGGDVNVEMDAAPGVDLSR	16	3	1	CON_00217963.3	M11(Oxidation)	2103.96	182036765	0	7.491e-09	High	4.1489	4.13298	4.76881	High	4.38292	High	3.96869	3.75711	0	8.78088e+07	169030285	114709048	1.523e+08	5.73663e+07	High	High	High
	RVLDELTLAR	15	14	6	CON_00217963.3;CON_00450768.7;CON_00384444.5;CON_00225378.3;CON_IPI00290077.1;CON_00721270.3		1185.69	3.32415e+08	0	0.00283	High	2.81234	3.01723	3.01004	High	2.4572	High	2.87055	2.75138	1	2.11266e+08	3.69018e+08	196917080	2.01938e+08	1.74467e+08	High	High	High
	ILNEMRDQYEQMAEK	5	3	1	CON_00217963.3		1897.88	148612829	0	8.299e-05	High	2.18129		2.53592			High			1	0	1.61319e+07	0	0	0
	VLDELTLAR	19	14	6	CON_00217963.3;CON_00450768.7;CON_00384444.5;CON_00225378.3;CON_IPI00290077.1;CON_00721270.3		1029.59	9.08887e+09	0	0.1014	High	2.44533	2.46618	2.45823	High	2.44914	High	2.76987	2.39104	0	5199572502	7.76205e+09	3174930880	4330476940	3.89393e+09	High	High	High
	VTMQNLNDRLASYLDK	26	5	5	CON_00217963.3;CON_00009865.2;CON_00384444.5;CON_00225378.3;CON_00721270.3	M3(Oxidation)	1896.95	10866599204	0	0.03647	High	5.28652	5.36713	5.22662	High	5.49288	High	5.6209	4.51143	1	1.75853e+10	14256368080	1.33535e+10	11808894612	5.70307e+09	High	High	High
	TDLEMQIEGLK	13	3	1	CON_00217963.3	M5(Oxidation)	1292.64	210737873	0	0.007444	High	3.11355	3.40721	2.84637	High	3.67376	High	3.03773	2.95601	0	102408148	231377130	1.12302e+08	123866404	6.83263e+07	High	High	High
	TDLEMQIEGLK	2	3	1	CON_00217963.3		1276.65	231985826	0	1.981e-06	High	2.8888		2.63436			High			0	0	0	0	0	0
	DAETWFLSK	14	1	1	CON_00217963.3		1096.53	1758537200	0	0.03076	High	2.20806	2.25925	2.19177	High	2.31816	High	2.17079	2.16169	0	7.76316e+08	1390841980	479114653	857785164	478489869	High	High	High
	VTMQNLNDRLASYLDK	22	5	5	CON_00217963.3;CON_00009865.2;CON_00384444.5;CON_00225378.3;CON_00721270.3		1880.95	6.49601e+09	0	7.766e-09	High	5.50291	5.73839	5.8316	High	4.66761	High	5.77971	4.47141	1	5467592780	6922246172	2446756519	3915193791	8.40131e+08	High	High	High
	IIAATIENAQPILQIDNAR	27	1	1	CON_00217963.3		2064.14	3558600644	0	5.242e-10	High	5.25816	5.02221	5.16605	High	4.42847	High	4.89001	5.16563	0	1504371682	2995971504	1061689582	1733571045	7.69794e+08	High	High	High
	VLQGLEIELQSQLSMK	22	1	1	CON_00217963.3	M15(Oxidation)	1831.99	230352098	0	3.745e-08	High	4.16869	4.62563	4.59181	High	3.96688	High	4.3049	3.36176	0	192232756	307634344	131560092	1.33603e+08	35721861	High	High	High
	LAADDFRTK	4	24	6	CON_00217963.3;CON_00450768.7;CON_109456;CON_00384444.5;CON_00721270.3;XBXL10_1g38935		1036.54	0	0	0.001575			1.27407	1.67138	High	1.47839	High			1	80396022	248306880	93327792	0	0	High
	NHEEEMLALR	5	4	1	CON_00217963.3	M6(Oxidation)	1257.59	0	0	0.02268			1.53597	1.90518	High	2.1153	High	1.67788		0	0	26341161	0	0	0	High	High
	NHEEEMLALRGQTGGDVNVEMDAAPGVDLSR	3	3	1	CON_00217963.3	M6(Oxidation); M21(Oxidation)	3342.52	0	0	0.0008276			4.33771	3.83321	High	5.01617	High			1	0	34483131	2.13434e+07	0	0	High
	YEHELALRQTVEADVNGLRR	5	1	1	CON_00217963.3		2369.23	0	0	0.001408			3.45393	4.09499	High	3.02462	High	3.20838		2	75950635	2.81625e+08	7.17334e+07	6.00897e+07	0	High	High
	DQYEQMAEK	3	3	1	CON_00217963.3	M6(Oxidation)	1157.48	0	0	0.06427				1.50965		1.72122	High	1.45757		0	0	7.13297e+06	1.47593e+07	16106718	0	High	High
	EVASNSELVQSSRSEVTELRR	3	1	1	CON_00217963.3		2376.21	0	0	0.001159				4.6599			High			2	0	190625204	0	0	0
	ISSVLAGGSCRAPSTYGGGLSVSSR	2	1	1	CON_00217963.3	C10(Carbamidomethyl)	2426.21	0	0	0.001799				3.36243			High	4.62682		1	0	6.18507e+07	0	9.38279e+07	0		High
	LAADDFRTKYEHELALR	1	1	1	CON_00217963.3		2048.06	0	0	0.000144				4.242			High			2	0	36695524	0	0	0
	VLDELTLARTDLEMQIEGLK	1	2	1	CON_00217963.3	M14(Oxidation)	2303.23	0	0	0.004951				4.36233			High			1	0	58932901	0	0	0
	SEVTELR	2	1	1	CON_00217963.3		833.437	0	0	0.09632								1.89724	1.71932	0	0	0	0	3.04277e+08	2.63926e+08		High	High
	NRRDAETWFLSK	3	1	1	CON_00217963.3		1522.78	0	0.001	0.02668			3.8214	3.12191	High		High	2.84317		2	7.07752e+07	80037645	0	39695954	0		High
	ILNEMR	8	8	4	CON_00217963.3;CON_00450768.7;CON_00384444.5;CON_00721270.3	M5(Oxidation)	791.407	7.59178e+07	0.002	0.1934	High	1.1178	0.931813	1.27956	High	1.18658	High	1.02107	1.04755	0	4.26425e+07	0	7.43976e+07	1.07041e+08	4.81487e+07	High	High	High
	IRDWYQR	13	6	4	CON_00217963.3;CON_00450768.7;CON_00384444.5;CON_00721270.3		1036.53	2.71729e+09	0.002	0.06085	High	2.31485	2.35329		High	2.22708		2.27788	2.4082	1	1629924146	0	1.56755e+09	1.82925e+09	1281146330	High	High	High
	ILNEMRDQYEQMAEK	1	3	1	CON_00217963.3	M12(Oxidation)	1913.87	39498809	0.002	0.03971	High	1.53609								1	0	0	0	0	0
	ILNEMR	1	8	4	CON_00217963.3;CON_00450768.7;CON_00384444.5;CON_00721270.3		775.413	0	0.005	0.1793	High	1.38675								0	0	0	0	0	0
CON_00721270.3	(Bos taurus) Gene_Symbol=KRT14 keratin 19 isoform 8 - [SWISS-PROT:P05785|ENSEMBL:ENSBTAP00000036252|REFSEQ:XP_881090]	53.25	7	1	38	676	5.29415e+10	3.66443e+10	31192104230	2.33473e+10	32290389445	2.80268e+10	333.126	51.15	33	119	307.936	51.15	35	110	356.851	290.768	289.434	282.777	51.78	51.15	51.15	53.25	35	33	32	34	125	110	104	108	477	51.8487	5.16064
	Sequence	# PSMs	# Proteins	# Protein Groups	Protein Group Accessions	Modifications	MH+ [Da]	A5: Area	q-Value	PEP	A6	XCorr A6	XCorr B6	XCorr C6	B6	XCorr D6	C6	XCorr E6	XCorr F6	# Missed Cleavages	B5: Area	C5: Area	D5: Area	E5: Area	F5: Area	D6	E6	F6
	VTMQNLNDR	17	13	8	CON_00217963.3;CON_IPI00328103.3;CON_00009865.2;CON_00384444.5;CON_00225378.3;CON_00798492.2;CON_IPI00418663.3;CON_00721270.3		1090.53	5634536621	0	0.002585	High	2.50245	1.92185	1.60108	High	1.64844	High	1.60811	2.01421	0	1152129504	1267228872	5.87505e+08	4.8586e+08	688406706	High	High	High
	VTMQNLNDR	25	13	8	CON_00217963.3;CON_IPI00328103.3;CON_00009865.2;CON_00384444.5;CON_00225378.3;CON_00798492.2;CON_IPI00418663.3;CON_00721270.3	M3(Oxidation)	1106.53	9863111330	0	0.08074	High	2.58102	2.61568	2.62295	High	2.64169	High	2.63705	2.64844	0	4699302517	2.20081e+09	3878612658	4334721004	5118874086	High	High	High
	CEMEQQNQEYK	9	6	3	CON_00450768.7;CON_00384444.5;CON_00721270.3	C1(Carbamidomethyl); M3(Oxidation)	1502.59	6.59166e+07	0	3.858e-05	High	3.49125	2.70787	2.79145	High	3.07505	High	2.94681	2.9254	0	6.20437e+07	3.94536e+07	37025405	4.01501e+07	25956512	High	High	High
	TIEDLRNK	8	5	3	CON_00217963.3;CON_00384444.5;CON_00721270.3		988.542	390834240	0	0.08052	High	1.68752	1.7444	1.74498	High	1.72831	High	1.69141	1.77357	1	723747156	9.64835e+08	4.201e+08	554285288	201869994	High	High	High
	CEMEQQNQEYK	3	6	3	CON_00450768.7;CON_00384444.5;CON_00721270.3	C1(Carbamidomethyl)	1486.59	6.07689e+07	0	1.609e-06	High	2.88725	2.68561	2.50998	High		High			0	1.44672e+07	1.16908e+07	0	0	0
	ILNEMRDQYEK	15	5	3	CON_00450768.7;CON_00384444.5;CON_00721270.3	M5(Oxidation)	1454.69	7.27559e+08	0	0.0001969	High	2.82542	2.95847	3.26268	High	2.70124	High	2.1688	2.31919	1	5.78753e+08	6.77585e+08	531252420	4.39427e+08	3.53693e+08	High	High	High
	SEISELRR	12	4	3	CON_00450768.7;CON_00384444.5;CON_00721270.3		989.538	1457996750	0	0.007153	High	2.08125	2.10278	1.92316	High	1.97719	High	1.88434	2.10592	1	1030321554	1.4564e+09	817612389	1000001931	847421018	High	High	High
	EVATNSELVQSGK	12	4	3	CON_00450768.7;CON_00384444.5;CON_00721270.3		1361.69	1693396508	0	1.588e-05	High	2.94184	3.75316	3.69504	High	2.9594	High	3.0863	3.24244	0	955744456	1.00064e+09	9.444e+08	1439483624	954137884	High	High	High
	SEISELR	7	4	3	CON_00450768.7;CON_00384444.5;CON_00721270.3		833.436	76631145	0	0.006075	High	1.96073	1.62101	1.57137	High	1.4305	High	1.67034	1.60264	0	91417938	124249002	106518486	166373652	94586434	High	High	High
	LASYLDK	48	25	13	CON_00217963.3;CON_00450768.7;CON_00009865.2;CON_00019359.3;CON_00384444.5;CON_00136056.1;CON_00225378.3;CON_IPI00290077.1;CON_00721270.3;CON_00912554.1;XBXL10_1g38958;XBXL10_1g38951;XBXL10_1g38957		809.44	60787022168	0	0.1013	High	2.05419	2.15733	1.9115	High	1.9521	High	2.09405	1.9971	0	42043828040	38071526344	2.88528e+10	39374069632	34696907176	High	High	High
	LEQEIATYRR	6	14	5	CON_00217963.3;CON_00450768.7;CON_00384444.5;CON_00721270.3;XBXL10_1g38935		1278.68	148048139	0	0.08137	High	2.7668	2.63498	2.99809	High	2.29553	High	2.89685	2.63635	1	63819251	8.15858e+07	50302320	6.65017e+07	82391197	High	High	High
	ISSVLAGGSCR	16	3	3	CON_00217963.3;CON_00384444.5;CON_00721270.3	C10(Carbamidomethyl)	1106.56	2015089620	0	0.024	High	3.62451	3.07095	3.37183	High	3.52932	High	3.08642	3.79861	0	1.31746e+09	2215512407	9.31632e+08	1.9005e+09	621449592	High	High	High
	EELAYLRK	11	4	2	CON_00217963.3;CON_00721270.3		1021.57	811811760	0	0.102	High	2.38713	2.11407	2.40933	High	2.44063	High	2.25849	2.21448	1	3.47986e+08	1.24066e+09	512270533	5.53407e+08	381480713	High	High	High
	LAADDFR	34	52	18	CON_00217963.3;CON_00450768.7;CON_109456;CON_00009865.2;CON_00136056.1;CON_00798492.2;CON_00912554.1;CON_18266793;CON_00384444.5;CON_00225378.3;CON_IPI00290077.1;CON_00721270.3;CON_IPI00418663.3;CON_00698285.3;CON_00708921.1;XBXL10_1g8279;XBXL10_1g38935;XBXL10_1g42200		807.4	8.7171e+10	0	0.01073	High	1.85348	2.01395	1.96806	High	1.91594	High	1.85693	1.89971	0	5.03039e+10	41248418266	2.78356e+10	45688204091	43680490412	High	High	High
	ILNEMRDQYEK	17	5	3	CON_00450768.7;CON_00384444.5;CON_00721270.3		1438.7	6.37206e+08	0	2.095e-06	High	3.93103	2.90363	2.94084	High	2.63355	High	2.22224	2.44767	1	206409528	282013133	6.4059e+07	20707177	60234039	High	High	High
	TKYETELNLR	17	4	2	CON_00384444.5;CON_00721270.3		1266.67	3116469958	0	0.001612	High	2.2427	2.69939	2.72517	High	1.8783	High	2.51454	1.97014	1	1973261504	2193753598	512906096	1339196390	695307328	High	High	High
	ASLENSLEETK	18	5	3	CON_00217963.3;CON_00384444.5;CON_00721270.3		1220.6	5860047876	0	0.0001795	High	2.82151	3.20162	2.79451	High	2.89442	High	2.73565	2.74368	0	4181403214	5099982200	2825746254	3694265216	2637553320	High	High	High
	TRLEQEIATYRR	16	14	5	CON_00217963.3;CON_00450768.7;CON_00384444.5;CON_00721270.3;XBXL10_1g38935		1535.83	5360875508	0	4.615e-06	High	5.23982	4.68044	4.17144	High	4.95308	High	4.15104	4.01963	2	4590374967	6196387286	2.98292e+09	3.70068e+09	2761370082	High	High	High
	ALEEANADLEVK	33	7	5	CON_00217963.3;CON_00384444.5;CON_00009866.6;CON_IPI00290077.1;CON_00721270.3		1301.66	3053539544	0	0.0002548	High	3.52351	2.84749	2.62275	High	2.27355	High	2.5089	2.87565	0	2060038760	2550206166	1525985722	2524907224	1692786076	High	High	High
	RLLEGEDAHLSSSQFSSGSQSSR	12	3	2	CON_00384444.5;CON_00721270.3		2465.16	504968750	0	9.952e-08	High	6.16745	5.48272	5.72199	High	5.41261	High	4.62836	4.95989	1	297600803	3.35893e+08	282403669	3.10109e+08	264858036	High	High	High
	YETELNLR	12	4	2	CON_00384444.5;CON_00721270.3		1037.53	1304490685	0	0.1258	High	1.79338	2.08179	1.78825	High	1.86719	High	2.00241	2.16591	0	823736320	1.39044e+09	5.83833e+08	512315633	6.93952e+08	High	High	High
	TEELNREVATNSELVQSGK	25	4	3	CON_00450768.7;CON_00384444.5;CON_00721270.3		2104.05	4219083504	0	2.92e-09	High	6.57605	7.27471	7.24982	High	6.60557	High	6.94401	6.9722	1	3.13357e+09	4.30981e+09	2.42114e+09	2.74222e+09	2242850828	High	High	High
	VRALEEANADLEVK	64	7	5	CON_00217963.3;CON_00384444.5;CON_00009866.6;CON_IPI00290077.1;CON_00721270.3		1556.83	1586539280	0	5.459e-05	High	4.77381	4.24671	5.43379	High	4.52334	High	4.4115	4.69009	1	1157383422	1.7632e+09	8.99133e+08	1024539101	829468411	High	High	High
	DYSPYFK	16	7	3	CON_00217963.3;CON_00384444.5;CON_00721270.3		919.419	4307080760	0	0.01386	High	1.32592	1.35485	1.15119	High	1.37494	High	1.32111	1.31355	0	3.03103e+09	4020577270	2160723872	2.91161e+09	2.16598e+09	High	High	High
	LLEGEDAHLSSSQFSSGSQSSR	22	3	2	CON_00384444.5;CON_00721270.3		2309.06	3235399480	0	5.023e-10	High	6.15903	6.38718	5.73366	High	5.54443	High	5.66463	5.61746	0	1649189493	2.23224e+09	1313336722	1.89063e+09	1546654034	High	High	High
	TRLEQEIATYR	22	19	9	CON_00217963.3;CON_00450768.7;CON_00384444.5;CON_00009866.6;CON_00136056.1;CON_00225378.3;CON_00721270.3;CON_IPI00290077.1;XBXL10_1g38935		1379.73	1895963698	0	0.0001588	High	4.46062	4.10304	4.32152	High	4.24209	High	3.89115	3.79536	1	1458997956	1569007143	7.96164e+08	1.35596e+09	791539982	High	High	High
	LSVEADINGLRR	14	3	2	CON_00450768.7;CON_00721270.3		1342.74	6.88658e+08	0	0.00312	High	3.13552	3.18899	2.99496	High	2.84339	High	2.95736	2.93367	1	6.45998e+08	7.98647e+08	2.66835e+08	370646029	2.88175e+08	High	High	High
	RVLDELTLAR	15	14	6	CON_00217963.3;CON_00450768.7;CON_00384444.5;CON_00225378.3;CON_IPI00290077.1;CON_00721270.3		1185.69	3.32415e+08	0	0.00283	High	2.81234	3.01723	3.01004	High	2.4572	High	2.87055	2.75138	1	2.11266e+08	3.69018e+08	196917080	2.01938e+08	1.74467e+08	High	High	High
	GQVGGDVNVEMDAAPGVDLSR	25	4	2	CON_00384444.5;CON_00721270.3	M11(Oxidation)	2101.98	365830476	0	2.225e-05	High	5.12639	4.9304	4.25264	High	5.43452	High	5.04896	4.58968	0	2.48145e+08	340770301	2.94006e+08	2.80891e+08	1.87832e+08	High	High	High
	VLDELTLAR	19	14	6	CON_00217963.3;CON_00450768.7;CON_00384444.5;CON_00225378.3;CON_IPI00290077.1;CON_00721270.3		1029.59	9.08887e+09	0	0.1014	High	2.44533	2.46618	2.45823	High	2.44914	High	2.76987	2.39104	0	5199572502	7.76205e+09	3174930880	4330476940	3.89393e+09	High	High	High
	VTMQNLNDRLASYLDK	26	5	5	CON_00217963.3;CON_00009865.2;CON_00384444.5;CON_00225378.3;CON_00721270.3	M3(Oxidation)	1896.95	10866599204	0	0.03647	High	5.28652	5.36713	5.22662	High	5.49288	High	5.6209	4.51143	1	1.75853e+10	14256368080	1.33535e+10	11808894612	5.70307e+09	High	High	High
	ADLEMQIESLK	8	3	2	CON_00384444.5;CON_00721270.3	M5(Oxidation)	1292.64	680375678	0	0.002807	High	2.7708	2.96472	2.76769	High	2.41086	High	3.11952	2.74417	0	312074017	497067217	3.78123e+08	264815326	390344112	High	High	High
	ADLEMQIESLK	1	3	2	CON_00384444.5;CON_00721270.3		1276.64	317529740	0	8.636e-06	High	3.26471								0	0	0	0	0	0
	VTMQNLNDRLASYLDK	22	5	5	CON_00217963.3;CON_00009865.2;CON_00384444.5;CON_00225378.3;CON_00721270.3		1880.95	6.49601e+09	0	7.766e-09	High	5.50291	5.73839	5.8316	High	4.66761	High	5.77971	4.47141	1	5467592780	6922246172	2446756519	3915193791	8.40131e+08	High	High	High
	DAEDWFFSK	13	4	2	CON_00450768.7;CON_00721270.3		1144.49	557173074	0	0.003391	High	2.16669	2.12516	2.05069	High	2.12214	High	2.0286	2.01435	0	5.52773e+08	707543268	3.73626e+08	532294203	2.82123e+08	High	High	High
	LAADDFRTK	4	24	6	CON_00217963.3;CON_00450768.7;CON_109456;CON_00384444.5;CON_00721270.3;XBXL10_1g38935		1036.54	0	0	0.001575			1.27407	1.67138	High	1.47839	High			1	80396022	248306880	93327792	0	0	High
	LAADDFRTKYETELNLR	3	4	2	CON_00384444.5;CON_00721270.3		2055.05	0	0	1.088e-05			5.04127	4.61975	High		High			2	107812128	207441246	0	0	0
	NHEEEMNSLRGQVGGDVNVEMDAAPGVDLSR	3	1	1	CON_00721270.3	M21(Oxidation)	3341.51	0	0	9.795e-12				6.67353			High		5.90066	1	0	111216336	0	0	5.62869e+07			High
	VLDELTLARADLEMQIESLK	1	3	2	CON_00384444.5;CON_00721270.3	M14(Oxidation)	2303.21	0	0	6.096e-07				4.52346			High			1	0	0	0	0	0
	LSVEADINGLR	1	3	2	CON_00450768.7;CON_00721270.3		1186.64	0	0	0.08385									2.10881	0	0	0	0	0	2.3268e+07			High
	ILNEMR	8	8	4	CON_00217963.3;CON_00450768.7;CON_00384444.5;CON_00721270.3	M5(Oxidation)	791.407	7.59178e+07	0.002	0.1934	High	1.1178	0.931813	1.27956	High	1.18658	High	1.02107	1.04755	0	4.26425e+07	0	7.43976e+07	1.07041e+08	4.81487e+07	High	High	High
	IRDWYQR	13	6	4	CON_00217963.3;CON_00450768.7;CON_00384444.5;CON_00721270.3		1036.53	2.71729e+09	0.002	0.06085	High	2.31485	2.35329		High	2.22708		2.27788	2.4082	1	1629924146	0	1.56755e+09	1.82925e+09	1281146330	High	High	High
	TEELNR	2	9	3	CON_00450768.7;CON_00384444.5;CON_00721270.3		761.379	3.87293e+07	0.005	0.1799	High	1.51669	1.48482		High					0	55187484	0	0	0	0
	ILNEMR	1	8	4	CON_00217963.3;CON_00450768.7;CON_00384444.5;CON_00721270.3		775.413	0	0.005	0.1793	High	1.38675								0	0	0	0	0	0
CON_IPI00306959.10	SWISS-PROT:P08729 Tax_Id=9606 Gene_Symbol=KRT7 Keratin, type II cytoskeletal 7	10.23	12	1	7	658	1.62658e+10	1.76975e+10	2.53324e+10	9.66312e+09	1.1008e+10	6.33259e+09	303.741	7.46	5	116	297.834	7.46	5	120	311.14	283.322	289.613	209.531	10.23	7.46	7.46	7.46	6	5	5	5	120	110	109	83	469	51.3864	5.57959
	Sequence	# PSMs	# Proteins	# Protein Groups	Protein Group Accessions	Modifications	MH+ [Da]	A5: Area	q-Value	PEP	A6	XCorr A6	XCorr B6	XCorr C6	B6	XCorr D6	C6	XCorr E6	XCorr F6	# Missed Cleavages	B5: Area	C5: Area	D5: Area	E5: Area	F5: Area	D6	E6	F6
	FLEQQNK	21	50	20	CON_IPI00290857.2;CON_107456;CON_00300725.7;CON_IPI00554648.3;CON_IPI00306959.10;CON_00009867.3;CON_00299145.9;CON_106456;CON_105456;CON_00166205.2;CON_00293665.7;CON_00697851.1;CON_00124800.2;CON_00221797.1;CON_IPI00241841.9;XBXL10_1g8290;XBXL10_1g8291;XBXL10_1g10877;XBXL10_1g10870;XBXL10_1g10871		906.468	2.22081e+09	0	0.1134	High	1.69707	1.73364	1.60086	High	1.57643	High	1.55466	1.64136	0	1627774338	1836262672	1.19747e+09	1.94041e+09	1.03942e+09	High	High	High
	LLEGEESR	6	18	5	CON_IPI00554648.3;CON_IPI00306959.10;XBXL10_1g8291;CON_105456;XBXL10_1g8290		932.469	1.03513e+08	0	0.01057	High	1.68179	1.33761		High	1.55677		1.48566	1.36341	0	3.37854e+07	0	29940111	2.74826e+07	2.75728e+07	High	High	High
	VRFLEQQNK	22	50	20	CON_IPI00290857.2;CON_107456;CON_00300725.7;CON_IPI00554648.3;CON_IPI00306959.10;CON_00009867.3;CON_00299145.9;CON_106456;CON_105456;CON_00166205.2;CON_00293665.7;CON_00697851.1;CON_00124800.2;CON_00221797.1;CON_IPI00241841.9;XBXL10_1g8290;XBXL10_1g8291;XBXL10_1g10877;XBXL10_1g10870;XBXL10_1g10871		1161.64	4228717839	0	0.01767	High	2.65454	2.71945	2.56823	High	2.672	High	2.65601	2.5828	1	3.39655e+09	4087371328	2.19974e+09	2.78177e+09	1985595236	High	High	High
	FASFIDK	17	52	24	CON_IPI00290857.2;CON_00300725.7;CON_IPI00554648.3;CON_IPI00306959.10;CON_00009867.3;CON_00299145.9;CON_IPI00174775.2;XBXL10_1g8291;CON_105456;CON_IPI00290078.5;CON_00021304.1;CON_00293665.7;CON_00697851.1;CON_00221797.1;CON_00347096.2;CON_00462140.1;CON_00622240.4;CON_IPI00376379.3;CON_IPI00241841.9;CON_00705721.2;XBXL10_1g8295;XBXL10_1g8290;XBXL10_1g10877;XBXL10_1g8289		827.43	20889928652	0	0.01631	High	1.92991	1.93893	1.85944	High	1.86668	High	1.68189	1.85885	0	16666804464	18271764520	10620704572	15494635570	1.1965e+10	High	High	High
	LALDIEIATYR	590	20	7	CON_IPI00554648.3;CON_IPI00306959.10;CON_IPI00853265.1;CON_IPI00290078.5;XBXL10_1g8295;XBXL10_1g8290;CON_00220327.3		1277.71	23678860064	0	1.17e-05	High	3.45539	3.37493	3.64133	High	3.42751	High	3.5266	3.47466	0	33029031143	32881500665	16168910608	14747663527	5.04712e+09	High	High	High
	KLLEGEESR	1	16	4	CON_IPI00554648.3;CON_IPI00306959.10;XBXL10_1g8291;XBXL10_1g8290		1060.56	0	0	0.001803				1.6249			High			1	0	24843994094	0	0	0
	SLDLDGIIAEVK	1	2	1	CON_IPI00306959.10		1272.7	0	0.005	0.1391				1.37282			High			0	0	3.51106e+06	0	0	0
XBXL10_1g8290	XBmRNA15670| krt78.1.L	8.79	11	1	7	658	1.62658e+10	1.76975e+10	2.53324e+10	9.66312e+09	1.1008e+10	6.33259e+09	303.741	7.16	5	116	297.834	7.16	5	120	312.993	283.322	289.613	209.531	8.79	7.16	7.16	7.16	6	5	5	5	120	110	109	83	489	53.635	9.37842
	Sequence	# PSMs	# Proteins	# Protein Groups	Protein Group Accessions	Modifications	MH+ [Da]	A5: Area	q-Value	PEP	A6	XCorr A6	XCorr B6	XCorr C6	B6	XCorr D6	C6	XCorr E6	XCorr F6	# Missed Cleavages	B5: Area	C5: Area	D5: Area	E5: Area	F5: Area	D6	E6	F6
	FLEQQNK	21	50	20	CON_IPI00290857.2;CON_107456;CON_00300725.7;CON_IPI00554648.3;CON_IPI00306959.10;CON_00009867.3;CON_00299145.9;CON_106456;CON_105456;CON_00166205.2;CON_00293665.7;CON_00697851.1;CON_00124800.2;CON_00221797.1;CON_IPI00241841.9;XBXL10_1g8290;XBXL10_1g8291;XBXL10_1g10877;XBXL10_1g10870;XBXL10_1g10871		906.468	2.22081e+09	0	0.1134	High	1.69707	1.73364	1.60086	High	1.57643	High	1.55466	1.64136	0	1627774338	1836262672	1.19747e+09	1.94041e+09	1.03942e+09	High	High	High
	LLEGEESR	6	18	5	CON_IPI00554648.3;CON_IPI00306959.10;XBXL10_1g8291;CON_105456;XBXL10_1g8290		932.469	1.03513e+08	0	0.01057	High	1.68179	1.33761		High	1.55677		1.48566	1.36341	0	3.37854e+07	0	29940111	2.74826e+07	2.75728e+07	High	High	High
	VRFLEQQNK	22	50	20	CON_IPI00290857.2;CON_107456;CON_00300725.7;CON_IPI00554648.3;CON_IPI00306959.10;CON_00009867.3;CON_00299145.9;CON_106456;CON_105456;CON_00166205.2;CON_00293665.7;CON_00697851.1;CON_00124800.2;CON_00221797.1;CON_IPI00241841.9;XBXL10_1g8290;XBXL10_1g8291;XBXL10_1g10877;XBXL10_1g10870;XBXL10_1g10871		1161.64	4228717839	0	0.01767	High	2.65454	2.71945	2.56823	High	2.672	High	2.65601	2.5828	1	3.39655e+09	4087371328	2.19974e+09	2.78177e+09	1985595236	High	High	High
	FASFIDK	17	52	24	CON_IPI00290857.2;CON_00300725.7;CON_IPI00554648.3;CON_IPI00306959.10;CON_00009867.3;CON_00299145.9;CON_IPI00174775.2;XBXL10_1g8291;CON_105456;CON_IPI00290078.5;CON_00021304.1;CON_00293665.7;CON_00697851.1;CON_00221797.1;CON_00347096.2;CON_00462140.1;CON_00622240.4;CON_IPI00376379.3;CON_IPI00241841.9;CON_00705721.2;XBXL10_1g8295;XBXL10_1g8290;XBXL10_1g10877;XBXL10_1g8289		827.43	20889928652	0	0.01631	High	1.92991	1.93893	1.85944	High	1.86668	High	1.68189	1.85885	0	16666804464	18271764520	10620704572	15494635570	1.1965e+10	High	High	High
	LALDIEIATYR	590	20	7	CON_IPI00554648.3;CON_IPI00306959.10;CON_IPI00853265.1;CON_IPI00290078.5;XBXL10_1g8295;XBXL10_1g8290;CON_00220327.3		1277.71	23678860064	0	1.17e-05	High	3.45539	3.37493	3.64133	High	3.42751	High	3.5266	3.47466	0	33029031143	32881500665	16168910608	14747663527	5.04712e+09	High	High	High
	KLLEGEESR	1	16	4	CON_IPI00554648.3;CON_IPI00306959.10;XBXL10_1g8291;XBXL10_1g8290		1060.56	0	0	0.001803				1.6249			High			1	0	24843994094	0	0	0
	EISELNR	1	1	1	XBXL10_1g8290		860.448	0	0.001	0.03689				1.85283			High			0	0	0	0	0	0
CON_IPI00853265.1	SWISS-PROT:Q6KB66-1 Tax_Id=9606 Gene_Symbol=KRT80 Isoform 1 of Keratin, type II cytoskeletal 80	33.19	5	14	15	656	7.96558e+09	1.10765e+10	1.1021e+10	5.42183e+09	4.96497e+09	1.71822e+09	306.453	23.01	9	111	301.65	26.33	10	116	320.463	289.599	299.785	221.476	26.33	27.65	29.87	26.33	12	12	12	11	122	111	111	85	452	50.4938	5.66846
	Sequence	# PSMs	# Proteins	# Protein Groups	Protein Group Accessions	Modifications	MH+ [Da]	A5: Area	q-Value	PEP	A6	XCorr A6	XCorr B6	XCorr C6	B6	XCorr D6	C6	XCorr E6	XCorr F6	# Missed Cleavages	B5: Area	C5: Area	D5: Area	E5: Area	F5: Area	D6	E6	F6
	AQYDAVAAR	7	1	1	CON_IPI00853265.1		964.484	5.55512e+07	0	0.002677	High	2.11645	2.31125	2.1429	High	2.04543	High	2.22052	1.92345	0	4.26042e+07	6.16621e+07	3.0565e+07	5.37848e+07	3.95215e+07	High	High	High
	SAEYGSSLQSSR	6	1	1	CON_IPI00853265.1		1271.59	4.73967e+07	0	0.0004837	High	2.50132	2.5478	2.47143	High	2.20493	High	2.39334	2.26613	0	37749958	4.44459e+07	2.50254e+07	4.08639e+07	2.63447e+07	High	High	High
	SLEEAEAYSR	5	2	1	CON_IPI00853265.1		1154.53	6.99244e+07	0	0.000856	High	2.20465	1.80444	1.93408	High		High	1.7695	1.77039	0	0	68931930	0	55709736	47158832		High	High
	TAEEQGELAFQDAK	6	1	1	CON_IPI00853265.1		1536.72	81405253	0	1.264e-06	High	3.53909	3.54763	3.35021	High	3.54387	High	3.30195	3.21784	0	71509559	87511245	54181379	73797863	5.31485e+07	High	High	High
	LAQLEAALQQAK	7	1	1	CON_IPI00853265.1		1283.73	8.29113e+07	0	2.435e-06	High	2.74094	2.56702	1.93949	High	2.02482	High	2.6596	2.19382	0	6.37201e+07	79179293	35835126	48275844	3.88535e+07	High	High	High
	LALDIEIATYR	590	20	7	CON_IPI00554648.3;CON_IPI00306959.10;CON_IPI00853265.1;CON_IPI00290078.5;XBXL10_1g8295;XBXL10_1g8290;CON_00220327.3		1277.71	23678860064	0	1.17e-05	High	3.45539	3.37493	3.64133	High	3.42751	High	3.5266	3.47466	0	33029031143	32881500665	16168910608	14747663527	5.04712e+09	High	High	High
	VTVNPGLLVPLDVK	5	1	1	CON_IPI00853265.1		1463.88	3.92287e+07	0	0.009122	High	3.38988		3.44352		2.78468	High	3.04183	2.77108	0	0	24475437	2.49734e+07	3.53084e+07	2.86064e+07	High	High	High
	GQLEANLLQVLEK	9	2	1	CON_IPI00853265.1		1454.82	1.3496e+08	0	0.01105	High	3.10375	3.20445	2.95781	High	2.8033	High	2.99601	3.25896	0	7.26171e+07	61530249	4.22121e+07	7.34588e+07	5.4395e+07	High	High	High
	VTVNPGLLVPLDVKLDPAVQQLK	4	1	1	CON_IPI00853265.1		2456.45	36177043	0	0.002394	High	2.284	2.9222	4.59344	High		High			1	0	29752758	0	0	0
	VQALEQR	5	2	1	CON_IPI00853265.1		843.469	0	0	0.01282			1.05871	1.1031	High	1.41195	High	1.20167	1.04932	0	3.46533e+07	3.81243e+07	2.17525e+07	2.97392e+07	2.61213e+07	High	High	High
	APGPGFSSR	2	1	1	CON_IPI00853265.1		875.436	0	0	0.02332						1.77644		1.8597		0	0	0	1.50801e+07	2.79104e+07	0	High	High
	LDPAVQQLK	4	1	1	CON_IPI00853265.1		1011.58	0	0.001	0.147				1.33582		1.41048	High	1.35274	1.34431	0	0	29740271	29106505	42084376	23973846	High	High	High
	DLDAECLHRTELETK	1	1	1	CON_IPI00853265.1	C6(Carbamidomethyl)	1829.87	0	0.001	0.1328								1.48919		1	0	0	0	0	0		High
	TIYEQELK	4	1	1	CON_IPI00853265.1		1023.54	0	0.003	0.2213			1.61332	1.5945	High	1.48217	High		1.77297	0	127935903	94106361	42383681	0	4.21136e+07	High		High
	SQILSVK	1	1	1	CON_IPI00853265.1		774.471	0	0.006	0.2895						1.46682				0	0	0	0	0	0	High
CON_00450768.7	SWISS-PROT:Q04695 Tax_Id=9606 Gene_Symbol=KRT17 Keratin, type I cytoskeletal 17	86.34	8	23	48	562	5.2349e+10	3.25158e+10	2.90273e+10	1.99544e+10	2.97976e+10	2.74238e+10	236.485	71.53	38	91	244.87	76.16	43	93	273.776	240.219	248.717	206.192	77.55	78.01	83.33	58.1	41	41	41	36	107	95	93	83	432	48.076	5.021
	Sequence	# PSMs	# Proteins	# Protein Groups	Protein Group Accessions	Modifications	MH+ [Da]	A5: Area	q-Value	PEP	A6	XCorr A6	XCorr B6	XCorr C6	B6	XCorr D6	C6	XCorr E6	XCorr F6	# Missed Cleavages	B5: Area	C5: Area	D5: Area	E5: Area	F5: Area	D6	E6	F6
	KNHEEEMNALR	6	7	3	CON_00450768.7;CON_00384444.5;XBXL10_1g38935	M7(Oxidation)	1386.64	6.00146e+07	0	0.0002643	High	3.31732	3.6536	3.32371	High	3.20565	High	3.42261	3.04212	1	5.26827e+07	4.73528e+07	2.98723e+07	4.24643e+07	1.11034e+07	High	High	High
	ATMQNLNDR	2	5	3	CON_00450768.7;CON_IPI00304458.2;CON_IPI00121462.1	M3(Oxidation)	1078.5	1.89976e+07	0	0.01638	High	2.29011	2.2307		High					0	1.6507e+07	0	0	0	0
	CEMEQQNQEYK	9	6	3	CON_00450768.7;CON_00384444.5;CON_00721270.3	C1(Carbamidomethyl); M3(Oxidation)	1502.59	6.59166e+07	0	3.858e-05	High	3.49125	2.70787	2.79145	High	3.07505	High	2.94681	2.9254	0	6.20437e+07	3.94536e+07	37025405	4.01501e+07	25956512	High	High	High
	NHEEEMNALR	14	8	3	CON_00450768.7;CON_00384444.5;XBXL10_1g38935	M6(Oxidation)	1258.55	1.49538e+08	0	0.07441	High	3.08979	2.55516	2.7843	High	2.81738	High	2.56288	2.70661	0	1.20112e+08	120809590	6.39366e+07	1.36109e+08	100701520	High	High	High
	CEMEQQNQEYK	3	6	3	CON_00450768.7;CON_00384444.5;CON_00721270.3	C1(Carbamidomethyl)	1486.59	6.07689e+07	0	1.609e-06	High	2.88725	2.68561	2.50998	High		High			0	1.44672e+07	1.16908e+07	0	0	0
	ATMQNLNDR	1	5	3	CON_00450768.7;CON_IPI00304458.2;CON_IPI00121462.1		1062.5	0	0	0.009234	High	2.11116								0	0	0	0	0	0
	QFTSSSSIK	12	2	1	CON_00450768.7		984.499	169328122	0	0.07851	High	2.45715	2.19482	2.34639	High	2.36079	High	2.53047	2.02605	0	9.25805e+07	2.66865e+08	9.82176e+07	116069947	8.30426e+07	High	High	High
	LSGGLGAGSCR	12	1	1	CON_00450768.7	C10(Carbamidomethyl)	1034.5	3.32389e+08	0	0.0001572	High	2.99768	3.02813	2.97101	High	2.93683	High	3.02292	2.78053	0	301837776	490086977	2.21093e+08	364718458	1.15395e+08	High	High	High
	ILNEMRDQYEK	15	5	3	CON_00450768.7;CON_00384444.5;CON_00721270.3	M5(Oxidation)	1454.69	7.27559e+08	0	0.0001969	High	2.82542	2.95847	3.26268	High	2.70124	High	2.1688	2.31919	1	5.78753e+08	6.77585e+08	531252420	4.39427e+08	3.53693e+08	High	High	High
	TIEELQNK	10	3	1	CON_00450768.7		974.515	480987276	0	0.04706	High	1.94342	1.91472	1.99262	High	1.98697	High	2.21297	2.00916	0	5.04003e+08	6.11711e+08	2.61806e+08	3.81131e+08	2.27273e+08	High	High	High
	SEISELRR	12	4	3	CON_00450768.7;CON_00384444.5;CON_00721270.3		989.538	1457996750	0	0.007153	High	2.08125	2.10278	1.92316	High	1.97719	High	1.88434	2.10592	1	1030321554	1.4564e+09	817612389	1000001931	847421018	High	High	High
	EVATNSELVQSGK	12	4	3	CON_00450768.7;CON_00384444.5;CON_00721270.3		1361.69	1693396508	0	1.588e-05	High	2.94184	3.75316	3.69504	High	2.9594	High	3.0863	3.24244	0	955744456	1.00064e+09	9.444e+08	1439483624	954137884	High	High	High
	TKFETEQALR	12	3	1	CON_00450768.7		1222.64	334069271	0	0.001104	High	3.31547	2.97577	3.62667	High	2.93032	High	2.86167	2.49815	1	239361722	3.18624e+08	1.1081e+08	174185572	137026275	High	High	High
	SEISELR	7	4	3	CON_00450768.7;CON_00384444.5;CON_00721270.3		833.436	76631145	0	0.006075	High	1.96073	1.62101	1.57137	High	1.4305	High	1.67034	1.60264	0	91417938	124249002	106518486	166373652	94586434	High	High	High
	LASYLDK	48	25	13	CON_00217963.3;CON_00450768.7;CON_00009865.2;CON_00019359.3;CON_00384444.5;CON_00136056.1;CON_00225378.3;CON_IPI00290077.1;CON_00721270.3;CON_00912554.1;XBXL10_1g38958;XBXL10_1g38951;XBXL10_1g38957		809.44	60787022168	0	0.1013	High	2.05419	2.15733	1.9115	High	1.9521	High	2.09405	1.9971	0	42043828040	38071526344	2.88528e+10	39374069632	34696907176	High	High	High
	LEQEIATYRR	6	14	5	CON_00217963.3;CON_00450768.7;CON_00384444.5;CON_00721270.3;XBXL10_1g38935		1278.68	148048139	0	0.08137	High	2.7668	2.63498	2.99809	High	2.29553	High	2.89685	2.63635	1	63819251	8.15858e+07	50302320	6.65017e+07	82391197	High	High	High
	EELAYLKK	8	10	3	CON_00450768.7;CON_00384444.5;XBXL10_1g38935		993.561	402707842	0	0.09072	High	2.34101	2.15478	2.22874	High	2.15905	High	2.20928	2.44893	1	233433546	320164884	164492149	157132416	1.80928e+08	High	High	High
	LAADDFR	34	52	18	CON_00217963.3;CON_00450768.7;CON_109456;CON_00009865.2;CON_00136056.1;CON_00798492.2;CON_00912554.1;CON_18266793;CON_00384444.5;CON_00225378.3;CON_IPI00290077.1;CON_00721270.3;CON_IPI00418663.3;CON_00698285.3;CON_00708921.1;XBXL10_1g8279;XBXL10_1g38935;XBXL10_1g42200		807.4	8.7171e+10	0	0.01073	High	1.85348	2.01395	1.96806	High	1.91594	High	1.85693	1.89971	0	5.03039e+10	41248418266	2.78356e+10	45688204091	43680490412	High	High	High
	ILNEMRDQYEK	17	5	3	CON_00450768.7;CON_00384444.5;CON_00721270.3		1438.7	6.37206e+08	0	2.095e-06	High	3.93103	2.90363	2.94084	High	2.63355	High	2.22224	2.44767	1	206409528	282013133	6.4059e+07	20707177	60234039	High	High	High
	TIVEEVQDGK	5	3	1	CON_00450768.7		1117.57	113698948	0	0.0007218	High	1.96279				1.85339		1.76321	1.12592	0	0	0	87225753	154761344	5.56822e+07	High	High	High
	LLEGEDAHLTQYKK	6	1	1	CON_00450768.7		1644.86	70908012	0	6.487e-06	High	3.17391	3.74555	3.40843	High	3.30469	High	3.22612		1	78488786	1.33102e+08	44466896	56033594	0	High	High
	DYSQYYR	10	1	1	CON_00450768.7		994.426	307094624	0	0.0713	High	1.60525	1.74479	1.68	High	1.52012	High	1.75591	1.67302	0	272246896	344719694	142111234	221970356	134402556	High	High	High
	ASLEGNLAETENR	4	1	1	CON_00450768.7		1403.68	47638939	0	2.758e-05	High	2.98494	3.01322		High	2.40315		2.91906		0	4.53811e+07	0	28089707	54968634	0	High	High
	TRLEQEIATYRR	16	14	5	CON_00217963.3;CON_00450768.7;CON_00384444.5;CON_00721270.3;XBXL10_1g38935		1535.83	5360875508	0	4.615e-06	High	5.23982	4.68044	4.17144	High	4.95308	High	4.15104	4.01963	2	4590374967	6196387286	2.98292e+09	3.70068e+09	2761370082	High	High	High
	EELAYLK	13	11	3	CON_00450768.7;CON_00384444.5;XBXL10_1g38935		865.467	2276185328	0	0.08454	High	2.05766	1.89413	1.83881	High	1.89492	High	1.80916	1.84277	0	1338807688	1935215167	1060952919	1295393709	1.24839e+09	High	High	High
	ALEEANTELEVK	12	2	1	CON_00450768.7		1345.68	452821598	0	7.428e-05	High	2.69225	3.41446	3.30825	High	2.75023	High	2.83508	2.22498	0	478466839	588728527	330274142	557013318	292440891	High	High	High
	LLEGEDAHLTQYK	14	1	1	CON_00450768.7		1516.76	193628380	0	0.004587	High	3.78519	3.93702	3.96728	High	3.65354	High	4.22118	3.57745	0	171705960	228547748	151782566	211271432	133942000	High	High	High
	TEELNREVATNSELVQSGK	25	4	3	CON_00450768.7;CON_00384444.5;CON_00721270.3		2104.05	4219083504	0	2.92e-09	High	6.57605	7.27471	7.24982	High	6.60557	High	6.94401	6.9722	1	3.13357e+09	4.30981e+09	2.42114e+09	2.74222e+09	2242850828	High	High	High
	VRALEEANTELEVK	20	2	1	CON_00450768.7		1600.85	2.47469e+08	0	5.339e-06	High	4.17577	4.07669	4.97167	High	4.13289	High	4.1201	3.72948	1	259832276	417948844	196710910	2.42338e+08	1.55553e+08	High	High	High
	TRLEQEIATYR	22	19	9	CON_00217963.3;CON_00450768.7;CON_00384444.5;CON_00009866.6;CON_00136056.1;CON_00225378.3;CON_00721270.3;CON_IPI00290077.1;XBXL10_1g38935		1379.73	1895963698	0	0.0001588	High	4.46062	4.10304	4.32152	High	4.24209	High	3.89115	3.79536	1	1458997956	1569007143	7.96164e+08	1.35596e+09	791539982	High	High	High
	LSVEADINGLRR	14	3	2	CON_00450768.7;CON_00721270.3		1342.74	6.88658e+08	0	0.00312	High	3.13552	3.18899	2.99496	High	2.84339	High	2.95736	2.93367	1	6.45998e+08	7.98647e+08	2.66835e+08	370646029	2.88175e+08	High	High	High
	RVLDELTLAR	15	14	6	CON_00217963.3;CON_00450768.7;CON_00384444.5;CON_00225378.3;CON_IPI00290077.1;CON_00721270.3		1185.69	3.32415e+08	0	0.00283	High	2.81234	3.01723	3.01004	High	2.4572	High	2.87055	2.75138	1	2.11266e+08	3.69018e+08	196917080	2.01938e+08	1.74467e+08	High	High	High
	VLDELTLAR	19	14	6	CON_00217963.3;CON_00450768.7;CON_00384444.5;CON_00225378.3;CON_IPI00290077.1;CON_00721270.3		1029.59	9.08887e+09	0	0.1014	High	2.44533	2.46618	2.45823	High	2.44914	High	2.76987	2.39104	0	5199572502	7.76205e+09	3174930880	4330476940	3.89393e+09	High	High	High
	ATMQNLNDRLASYLDK	6	3	1	CON_00450768.7	M3(Oxidation)	1868.92	70397321	0	0.04776	High	3.14124	1.25912	3.75276	High	3.76538	High	1.8693	3.80767	1	148234068	167416123	131853143	108419467	38761303	High	High	High
	ADLEMQIENLK	10	3	1	CON_00450768.7	M5(Oxidation)	1319.65	120524324	0	0.002908	High	3.04682	2.77962	3.55743	High	3.18424	High	2.99527	3.0201	0	0	96093100	4.79811e+07	52854723	37058642	High	High	High
	DAEDWFFSK	13	4	2	CON_00450768.7;CON_00721270.3		1144.49	557173074	0	0.003391	High	2.16669	2.12516	2.05069	High	2.12214	High	2.0286	2.01435	0	5.52773e+08	707543268	3.73626e+08	532294203	2.82123e+08	High	High	High
	ILTATVDNANILLQIDNAR	31	1	1	CON_00450768.7		2068.14	373240695	0	2.357e-10	High	4.69646	5.01833	5.19294	High	4.84949	High	4.97543	4.68089	0	543051028	6.66737e+08	3.62407e+08	366839766	1.79227e+08	High	High	High
	LGSAGGLGSTLGGSSYSSCYSFGSGGGYGSSFGGVDGLLAGGEK	5	1	1	CON_00450768.7	C19(Carbamidomethyl)	4024.81	0	0	1.768e-06	High	5.34011	5.99343	4.90485	High	3.34636	High	4.93079		0	0	0	1.78843e+07	0	0	High	High
	LAADDFRTK	4	24	6	CON_00217963.3;CON_00450768.7;CON_109456;CON_00384444.5;CON_00721270.3;XBXL10_1g38935		1036.54	0	0	0.001575			1.27407	1.67138	High	1.47839	High			1	80396022	248306880	93327792	0	0	High
	FETEQALR	5	3	1	CON_00450768.7		993.501	0	0	0.003664			1.66919	1.86675	High	1.71305	High	1.55855	1.81476	0	1.27524e+08	2.04835e+08	7.18414e+07	9.07725e+07	6.36018e+07	High	High	High
	RLLEGEDAHLTQYKK	4	1	1	CON_00450768.7		1800.96	0	0	0.00619			1.49408	2.80606	High		High			2	3.65184e+07	4.74596e+07	0	0	0
	QAPGPARDYSQYYR	5	1	1	CON_00450768.7		1671.79	0	0	0.003935			2.99348	3.13751	High	2.89468	High	2.65644		1	99229642	194501276	49528070	0	0	High	High
	RLLEGEDAHLTQYK	6	1	1	CON_00450768.7		1672.86	0	0	0.007947			3.57563	3.72826	High	4.12354	High	3.84471	3.72454	1	40478435	101359034	5.30546e+07	77880000	36429878	High	High	High
	ASLEGNLAETENRYCVQLSQIQGLIGSVEEQLAQLR	4	1	1	CON_00450768.7	C15(Carbamidomethyl)	4017.04	0	0	1.953e-06			5.04404	3.00547	High		High	3.54364		1	101599008	0	0	0	0		High
	LAADDFRTKFETEQALR	3	3	1	CON_00450768.7		2011.02	0	0	3.008e-05				3.99189			High			2	0	35329768	0	0	0
	ADLEMQIENLK	1	3	1	CON_00450768.7		1303.65	0	0	0.0001305				2.41544			High			0	0	28857407	0	0	0
	GQVGGEINVEMDAAPGVDLSR	4	2	1	CON_00450768.7	M11(Oxidation)	2130.01	0	0	0.01135						3.31494		3.53531		0	0	0	7.90803e+06	2.30923e+07	0	High	High
	LSVEADINGLR	1	3	2	CON_00450768.7;CON_00721270.3		1186.64	0	0	0.08385									2.10881	0	0	0	0	0	2.3268e+07			High
	ILNEMR	8	8	4	CON_00217963.3;CON_00450768.7;CON_00384444.5;CON_00721270.3	M5(Oxidation)	791.407	7.59178e+07	0.002	0.1934	High	1.1178	0.931813	1.27956	High	1.18658	High	1.02107	1.04755	0	4.26425e+07	0	7.43976e+07	1.07041e+08	4.81487e+07	High	High	High
	IRDWYQR	13	6	4	CON_00217963.3;CON_00450768.7;CON_00384444.5;CON_00721270.3		1036.53	2.71729e+09	0.002	0.06085	High	2.31485	2.35329		High	2.22708		2.27788	2.4082	1	1629924146	0	1.56755e+09	1.82925e+09	1281146330	High	High	High
	VISSREQVHQTTR	1	2	1	CON_00450768.7		1540.82	0	0.002	0.06183				1.70308			High			1	0	1.18251e+07	0	0	0
	TEELNR	2	9	3	CON_00450768.7;CON_00384444.5;CON_00721270.3		761.379	3.87293e+07	0.005	0.1799	High	1.51669	1.48482		High					0	55187484	0	0	0	0
	ILNEMR	1	8	4	CON_00217963.3;CON_00450768.7;CON_00384444.5;CON_00721270.3		775.413	0	0.005	0.1793	High	1.38675								0	0	0	0	0	0
CON_IPI00290857.2	SWISS-PROT:P12035 Tax_Id=9606 Gene_Symbol=KRT3 Keratin, type II cytoskeletal 3	13.2	7	1	19	548	1.52098e+10	1.19174e+10	1.35797e+10	8.52066e+09	1.08175e+10	9.04763e+09	212.612	11.45	17	85	251.196	13.2	19	103	322.346	189.764	212.579	136.293	11.45	11.45	11.45	11.45	16	17	17	17	133	81	88	58	629	64.4646	6.48096
	Sequence	# PSMs	# Proteins	# Protein Groups	Protein Group Accessions	Modifications	MH+ [Da]	A5: Area	q-Value	PEP	A6	XCorr A6	XCorr B6	XCorr C6	B6	XCorr D6	C6	XCorr E6	XCorr F6	# Missed Cleavages	B5: Area	C5: Area	D5: Area	E5: Area	F5: Area	D6	E6	F6
	KKYEDEINK	6	13	6	CON_IPI00290857.2;CON_00021304.1;CON_00622240.4;XBXL10_1g10877;XBXL10_1g10870;XBXL10_1g10871		1166.61	1.01709e+08	0	0.0007587	High	3.75651	3.14547	2.61658	High	2.3219	High	2.42239	2.24733	2	5.70149e+07	8.96492e+07	3.29458e+07	4.33166e+07	3.82106e+07	High	High	High
	YEDEINKR	24	40	19	CON_IPI00290857.2;CON_00300725.7;CON_IPI00554648.3;CON_00009867.3;CON_00299145.9;CON_00220327.3;CON_00021304.1;CON_00293665.7;CON_00697851.1;CON_00221797.1;CON_00462140.1;CON_00622240.4;CON_IPI00376379.3;XBXL10_1g8295;XBXL10_1g8289;XBXL10_1g8291;XBXL10_1g10877;XBXL10_1g10870;XBXL10_1g10871		1066.52	6456119504	0	0.008032	High	1.96031	1.94761	1.86407	High	1.85402	High	1.82619	1.92686	1	4.07321e+09	3694448402	4304846388	4.86375e+09	3934580898	High	High	High
	KYEDEINKR	42	14	6	CON_IPI00290857.2;CON_00021304.1;CON_00622240.4;XBXL10_1g10877;XBXL10_1g10870;XBXL10_1g10871		1194.61	8817102704	0	0.02105	High	3.30522	3.34471	3.37958	High	3.33172	High	3.41911	3.17416	2	6.6859e+09	6.52491e+09	5.11005e+09	7.16632e+09	5.6767e+09	High	High	High
	KYEDEINK	12	14	6	CON_IPI00290857.2;CON_00021304.1;CON_00622240.4;XBXL10_1g10877;XBXL10_1g10870;XBXL10_1g10871		1038.51	2.42849e+09	0	0.0007574	High	3.09885	2.70109	2.76645	High	2.53451	High	2.77319	2.76411	1	1330350488	1.68288e+09	9.31537e+08	1.1934e+09	1.06234e+09	High	High	High
	FLEQQNK	21	50	20	CON_IPI00290857.2;CON_107456;CON_00300725.7;CON_IPI00554648.3;CON_IPI00306959.10;CON_00009867.3;CON_00299145.9;CON_106456;CON_105456;CON_00166205.2;CON_00293665.7;CON_00697851.1;CON_00124800.2;CON_00221797.1;CON_IPI00241841.9;XBXL10_1g8290;XBXL10_1g8291;XBXL10_1g10877;XBXL10_1g10870;XBXL10_1g10871		906.468	2.22081e+09	0	0.1134	High	1.69707	1.73364	1.60086	High	1.57643	High	1.55466	1.64136	0	1627774338	1836262672	1.19747e+09	1.94041e+09	1.03942e+09	High	High	High
	YEDEINK	32	43	20	CON_IPI00290857.2;CON_00300725.7;CON_IPI00554648.3;CON_00009867.3;CON_00299145.9;XBXL10_1g8291;CON_00220327.3;CON_00021304.1;CON_00293665.7;CON_00697851.1;CON_00221797.1;CON_00462140.1;CON_00622240.4;CON_IPI00376379.3;CON_IPI00241841.9;XBXL10_1g8295;XBXL10_1g8289;XBXL10_1g10877;XBXL10_1g10870;XBXL10_1g10871		910.416	15922380192	0	0.01896	High	2.1327	2.12545	1.91357	High	1.77495	High	1.92556	1.81321	0	8.65848e+09	11362991318	9786637980	9.7915e+09	9.50114e+09	High	High	High
	VRFLEQQNK	22	50	20	CON_IPI00290857.2;CON_107456;CON_00300725.7;CON_IPI00554648.3;CON_IPI00306959.10;CON_00009867.3;CON_00299145.9;CON_106456;CON_105456;CON_00166205.2;CON_00293665.7;CON_00697851.1;CON_00124800.2;CON_00221797.1;CON_IPI00241841.9;XBXL10_1g8290;XBXL10_1g8291;XBXL10_1g10877;XBXL10_1g10870;XBXL10_1g10871		1161.64	4228717839	0	0.01767	High	2.65454	2.71945	2.56823	High	2.672	High	2.65601	2.5828	1	3.39655e+09	4087371328	2.19974e+09	2.78177e+09	1985595236	High	High	High
	AEAEALYQTK	13	10	5	CON_IPI00290857.2;CON_IPI00174775.2;CON_IPI00290078.5;CON_00166205.2;CON_00705721.2		1123.56	23286805	0	0.03209	High	2.80561	2.72068	2.79598	High	2.76629	High	2.89807	2.80533	0	59566298	74189925	51375198	78841091	3.16885e+07	High	High	High
	RTAAENEFVTLKK	12	6	4	CON_IPI00290857.2;CON_00300725.7;CON_00299145.9;CON_00293665.7		1506.83	1115768203	0	4.305e-05	High	3.527	4.74071	3.69602	High	3.03869	High	3.66463	3.15506	2	593780925	1.25121e+09	392099704	4.5292e+08	3.07021e+08	High	High	High
	DYQELMNVK	5	5	3	CON_IPI00290857.2;CON_00021304.1;CON_IPI00241841.9	M6(Oxidation)	1155.54	0	0	0.01393	High	1.81661	1.9335		High	1.86824		1.92287		0	8.02178e+07	0	62120528	0	0	High	High
	TAAENEFVTLKK	12	6	4	CON_IPI00290857.2;CON_00300725.7;CON_00299145.9;CON_00293665.7		1350.73	444083464	0	0.01778	High	3.20491	3.09843	3.26024	High	2.97485	High	3.35278	2.85221	1	321196424	486795719	179723664	228521248	1.19402e+08	High	High	High
	RTAAENEFVTLK	15	6	4	CON_IPI00290857.2;CON_00300725.7;CON_00299145.9;CON_00293665.7		1378.73	3.80351e+08	0	0.06509	High	3.52149	3.44464	3.36353	High	3.56962	High	2.99393	3.25194	1	197724322	447114100	1.51767e+08	228439430	113794218	High	High	High
	FASFIDK	17	52	24	CON_IPI00290857.2;CON_00300725.7;CON_IPI00554648.3;CON_IPI00306959.10;CON_00009867.3;CON_00299145.9;CON_IPI00174775.2;XBXL10_1g8291;CON_105456;CON_IPI00290078.5;CON_00021304.1;CON_00293665.7;CON_00697851.1;CON_00221797.1;CON_00347096.2;CON_00462140.1;CON_00622240.4;CON_IPI00376379.3;CON_IPI00241841.9;CON_00705721.2;XBXL10_1g8295;XBXL10_1g8290;XBXL10_1g10877;XBXL10_1g8289		827.43	20889928652	0	0.01631	High	1.92991	1.93893	1.85944	High	1.86668	High	1.68189	1.85885	0	16666804464	18271764520	10620704572	15494635570	1.1965e+10	High	High	High
	LLRDYQELMNVK	35	4	3	CON_IPI00290857.2;CON_00021304.1;CON_IPI00241841.9	M9(Oxidation)	1537.81	3989037768	0	6.602e-06	High	4.65285	4.31071	4.41015	High	4.3294	High	4.48099	4.54444	1	1656575984	1.67459e+09	805257340	1196642715	2458973840	High	High	High
	TAAENEFVTLK	18	6	4	CON_IPI00290857.2;CON_00300725.7;CON_00299145.9;CON_00293665.7		1222.63	1130548512	0	4.239e-05	High	3.11487	2.98119	3.07404	High	3.02891	High	2.94193	2.912	0	785780310	1098318642	7.231e+08	1143254363	506500205	High	High	High
	DYQELMNVK	2	5	3	CON_IPI00290857.2;CON_00021304.1;CON_IPI00241841.9		1139.54	132407220	0	0.01085	High	1.76039							1.61673	0	0	0	0	0	15415408			High
	LALDVEIATYRK	187	19	10	CON_IPI00290857.2;CON_00300725.7;CON_00009867.3;CON_00299145.9;CON_00021304.1;CON_00293665.7;CON_00697851.1;CON_00221797.1;CON_IPI00241841.9;XBXL10_1g8291		1391.79	7597148856	0	0.001571	High	3.94584	3.84747	3.93288	High	3.94186	High	3.85479	3.99987	1	10426772410	1.11043e+10	5.15464e+09	5.4941e+09	2.00012e+09	High	High	High
	LLRDYQELMNVK	17	4	3	CON_IPI00290857.2;CON_00021304.1;CON_IPI00241841.9		1521.81	2977459032	0	1.222e-06	High	4.33168	4.24955	4.14374	High	3.84332	High	3.84552	3.99919	1	8.59941e+08	1157149710	3.15926e+08	376860695	514086193	High	High	High
	LALDVEIATYR	54	25	10	CON_IPI00290857.2;CON_00300725.7;CON_00009867.3;CON_00299145.9;CON_00021304.1;CON_00293665.7;CON_00697851.1;CON_00221797.1;CON_IPI00241841.9;XBXL10_1g8291		1263.69	790710142	0	0.004243	High	2.71855	2.46588	2.97101	High	2.82559	High	2.99738	2.61927	0	862913883	1289158834	604167874	741664298	61439000	High	High	High
	SKAEAEALYQTK	1	9	4	CON_IPI00290857.2;CON_IPI00174775.2;CON_IPI00290078.5;CON_00705721.2		1338.69	0	0	0.006457			2.34216		High					1	4.43703e+07	0	0	0	0
	SGAGGFGSR	1	1	1	CON_IPI00290857.2		795.374	0	0.004	0.09629			2.05928		High					0	1.48255e+07	0	0	0	0
CON_00221797.1	TREMBL:Q8BGZ7;Q99MH7 Tax_Id=10090 Gene_Symbol=Krt75 10 days neonate skin cDNA, RIKEN full-length enriched library, clone:4732475I03 product:CYTOKERATIN homolog	21.6	4	2	16	548	4.10562e+10	3.50144e+10	3.51356e+10	24167621996	2.977e+10	2.24812e+10	195.219	15.79	14	83	241.402	19.78	15	103	310.992	173.892	193.971	127.623	15.79	15.79	17.6	15.79	14	14	15	14	134	80	88	60	551	59.7039	8.30908
	Sequence	# PSMs	# Proteins	# Protein Groups	Protein Group Accessions	Modifications	MH+ [Da]	A5: Area	q-Value	PEP	A6	XCorr A6	XCorr B6	XCorr C6	B6	XCorr D6	C6	XCorr E6	XCorr F6	# Missed Cleavages	B5: Area	C5: Area	D5: Area	E5: Area	F5: Area	D6	E6	F6
	YEDEINKR	24	40	19	CON_IPI00290857.2;CON_00300725.7;CON_IPI00554648.3;CON_00009867.3;CON_00299145.9;CON_00220327.3;CON_00021304.1;CON_00293665.7;CON_00697851.1;CON_00221797.1;CON_00462140.1;CON_00622240.4;CON_IPI00376379.3;XBXL10_1g8295;XBXL10_1g8289;XBXL10_1g8291;XBXL10_1g10877;XBXL10_1g10870;XBXL10_1g10871		1066.52	6456119504	0	0.008032	High	1.96031	1.94761	1.86407	High	1.85402	High	1.82619	1.92686	1	4.07321e+09	3694448402	4304846388	4.86375e+09	3934580898	High	High	High
	FLEQQNK	21	50	20	CON_IPI00290857.2;CON_107456;CON_00300725.7;CON_IPI00554648.3;CON_IPI00306959.10;CON_00009867.3;CON_00299145.9;CON_106456;CON_105456;CON_00166205.2;CON_00293665.7;CON_00697851.1;CON_00124800.2;CON_00221797.1;CON_IPI00241841.9;XBXL10_1g8290;XBXL10_1g8291;XBXL10_1g10877;XBXL10_1g10870;XBXL10_1g10871		906.468	2.22081e+09	0	0.1134	High	1.69707	1.73364	1.60086	High	1.57643	High	1.55466	1.64136	0	1627774338	1836262672	1.19747e+09	1.94041e+09	1.03942e+09	High	High	High
	YEDEINK	32	43	20	CON_IPI00290857.2;CON_00300725.7;CON_IPI00554648.3;CON_00009867.3;CON_00299145.9;XBXL10_1g8291;CON_00220327.3;CON_00021304.1;CON_00293665.7;CON_00697851.1;CON_00221797.1;CON_00462140.1;CON_00622240.4;CON_IPI00376379.3;CON_IPI00241841.9;XBXL10_1g8295;XBXL10_1g8289;XBXL10_1g10877;XBXL10_1g10870;XBXL10_1g10871		910.416	15922380192	0	0.01896	High	2.1327	2.12545	1.91357	High	1.77495	High	1.92556	1.81321	0	8.65848e+09	11362991318	9786637980	9.7915e+09	9.50114e+09	High	High	High
	KLLEGEECR	19	27	11	CON_00300725.7;CON_00009867.3;CON_00299145.9;CON_IPI00174775.2;CON_00021304.1;CON_00293665.7;CON_00697851.1;CON_00221797.1;CON_00622240.4;XBXL10_1g10877;XBXL10_1g8289	C8(Carbamidomethyl)	1133.56	1.51246e+08	0	0.01377	High	2.70506	2.74776	2.88956	High	2.74487	High	2.70547	2.45344	1	1.94911e+08	197230801	1.65718e+08	2.6809e+08	1.23714e+08	High	High	High
	LLEGEECR	21	28	12	CON_00300725.7;CON_00009867.3;CON_00299145.9;CON_IPI00174775.2;CON_00166205.2;CON_00021304.1;CON_00293665.7;CON_00697851.1;CON_00221797.1;CON_00622240.4;XBXL10_1g10877;XBXL10_1g8289	C7(Carbamidomethyl)	1005.47	5.60345e+09	0	0.02935	High	2.10841	2.09917	2.11088	High	2.11073	High	2.11532	2.10963	0	5.59857e+09	5.17908e+09	3.26645e+09	4.908e+09	2.35489e+09	High	High	High
	VRFLEQQNK	22	50	20	CON_IPI00290857.2;CON_107456;CON_00300725.7;CON_IPI00554648.3;CON_IPI00306959.10;CON_00009867.3;CON_00299145.9;CON_106456;CON_105456;CON_00166205.2;CON_00293665.7;CON_00697851.1;CON_00124800.2;CON_00221797.1;CON_IPI00241841.9;XBXL10_1g8290;XBXL10_1g8291;XBXL10_1g10877;XBXL10_1g10870;XBXL10_1g10871		1161.64	4228717839	0	0.01767	High	2.65454	2.71945	2.56823	High	2.672	High	2.65601	2.5828	1	3.39655e+09	4087371328	2.19974e+09	2.78177e+09	1985595236	High	High	High
	SRAEAESWYQTK	23	8	4	CON_00300725.7;CON_00299145.9;CON_00293665.7;CON_00221797.1		1455.69	1.28835e+09	0	0.0001754	High	4.29968	4.06101	3.8515	High	3.59937	High	3.71001	3.41471	1	7.87692e+08	1091641130	5.9049e+08	811200782	388453758	High	High	High
	EYQELMNVK	12	16	7	CON_00300725.7;CON_IPI00554648.3;CON_00299145.9;CON_00293665.7;CON_00221797.1;XBXL10_1g8291;XBXL10_1g8295	M6(Oxidation)	1169.55	3.00971e+08	0	0.01359	High	2.25551	2.14913	2.24799	High	2.18588	High	2.20179	2.24713	0	3.02686e+08	3.98298e+08	2.11778e+08	2.18878e+08	127182717	High	High	High
	AEAESWYQTK	6	8	4	CON_00300725.7;CON_00299145.9;CON_00293665.7;CON_00221797.1		1212.55	351442500	0	0.0004151	High	2.60834	3.055	2.26142	High	2.50063	High	2.13846	2.20617	0	211930682	258579044	126678098	49754084	0	High	High	High
	YEELQVTAGR	20	7	4	CON_00300725.7;CON_00299145.9;CON_00293665.7;CON_00221797.1		1165.58	2015667680	0	0.0002659	High	2.69393	3.49578	2.63959	High	2.60027	High	2.60837	2.60053	0	1204848552	1875098360	889203902	1343504944	6.42028e+08	High	High	High
	EYQELMNVK	4	16	7	CON_00300725.7;CON_IPI00554648.3;CON_00299145.9;CON_00293665.7;CON_00221797.1;XBXL10_1g8291;XBXL10_1g8295		1153.56	194084114	0	0.002238	High	1.61892	1.86282	1.70218	High		High			0	8.51266e+07	123591687	0	0	0
	FASFIDK	17	52	24	CON_IPI00290857.2;CON_00300725.7;CON_IPI00554648.3;CON_IPI00306959.10;CON_00009867.3;CON_00299145.9;CON_IPI00174775.2;XBXL10_1g8291;CON_105456;CON_IPI00290078.5;CON_00021304.1;CON_00293665.7;CON_00697851.1;CON_00221797.1;CON_00347096.2;CON_00462140.1;CON_00622240.4;CON_IPI00376379.3;CON_IPI00241841.9;CON_00705721.2;XBXL10_1g8295;XBXL10_1g8290;XBXL10_1g10877;XBXL10_1g8289		827.43	20889928652	0	0.01631	High	1.92991	1.93893	1.85944	High	1.86668	High	1.68189	1.85885	0	16666804464	18271764520	10620704572	15494635570	1.1965e+10	High	High	High
	LALDVEIATYRK	187	19	10	CON_IPI00290857.2;CON_00300725.7;CON_00009867.3;CON_00299145.9;CON_00021304.1;CON_00293665.7;CON_00697851.1;CON_00221797.1;CON_IPI00241841.9;XBXL10_1g8291		1391.79	7597148856	0	0.001571	High	3.94584	3.84747	3.93288	High	3.94186	High	3.85479	3.99987	1	10426772410	1.11043e+10	5.15464e+09	5.4941e+09	2.00012e+09	High	High	High
	LALDVEIATYR	54	25	10	CON_IPI00290857.2;CON_00300725.7;CON_00009867.3;CON_00299145.9;CON_00021304.1;CON_00293665.7;CON_00697851.1;CON_00221797.1;CON_IPI00241841.9;XBXL10_1g8291		1263.69	790710142	0	0.004243	High	2.71855	2.46588	2.97101	High	2.82559	High	2.99738	2.61927	0	862913883	1289158834	604167874	741664298	61439000	High	High	High
	SLDLDSIIAEVK	84	6	3	CON_00220327.3;CON_00697851.1;CON_00221797.1		1302.72	86356172768	0	0.007808	High	3.26903	3.30278	3.2772	High	3.08912	High	3.41431	3.07351	0	7.79496e+10	75772109644	52095523436	64023846599	4.59773e+10	High	High	High
	KQCSSLQTAISDAEQRGELALK	1	1	1	CON_00221797.1	C3(Carbamidomethyl)	2433.23	0	0	0.01821			3.45738		High					2	0	0	0	0	0
	NMQEVVEDFK	1	1	1	CON_00221797.1		1238.57	0	0.003	0.1964								1.61352		0	0	0	0	3.30909e+07	0		High
CON_00686447.3	(Bos taurus) Gene_Symbol=DSP similar to Desmoplakin (DP) (250/210 kDa paraneoplastic pemphigus antigen) isoform 1 - [ENSEMBL:ENSBTAP00000020103|REFSEQ:XP_592197]	29.18	8	80	89	526	4.85664e+08	2.86895e+08	403800210	2.47725e+08	316726361	2.63029e+08	229.916	21.88	62	94	172.481	20.63	58	75	247.713	209.836	209.441	155.021	22.67	22.12	23.33	18.66	68	63	64	50	101	92	91	73	2889	332.177	6.84424
	Sequence	# PSMs	# Proteins	# Protein Groups	Protein Group Accessions	Modifications	MH+ [Da]	A5: Area	q-Value	PEP	A6	XCorr A6	XCorr B6	XCorr C6	B6	XCorr D6	C6	XCorr E6	XCorr F6	# Missed Cleavages	B5: Area	C5: Area	D5: Area	E5: Area	F5: Area	D6	E6	F6
	VIETNRENDK	2	1	1	CON_00686447.3		1217.61	2.17657e+07	0	0.000138	High	2.83358	2.52843		High					1	2.65121e+07	0	0	0	0
	QALEASNR	2	1	1	CON_00686447.3		888.453	2.61953e+07	0	0.008902	High	1.53467	1.57805		High					0	2.55188e+07	0	0	0	0
	QSLDDAAK	4	1	1	CON_00686447.3		847.416	2.7004e+07	0	0.006966	High	2.44909	2.20529	2.29934	High		High	1.9864		0	2.45568e+07	1.32497e+07	0	5.47784e+06	0		High
	NLHSEISGKR	9	1	1	CON_00686447.3		1140.61	1.71776e+08	0	0.00228	High	3.04445	2.20077	2.85722	High	2.54202	High	2.51052	2.96351	1	1.23433e+08	1.68047e+08	1.03769e+08	1.14288e+08	9.82855e+07	High	High	High
	QSLEEAAK	5	1	1	CON_00686447.3		875.446	5.32979e+08	0	0.01248	High	1.51503	2.05515	2.24938	High	1.6531	High	2.02558		0	133840024	1.09961e+08	31657868	44064198	0	High	High
	KREYENELAK	5	1	1	CON_00686447.3		1279.66	1.13906e+08	0	0.07378	High	4.24699		4.23092		3.87099	High	4.32874	3.87621	2	0	8.65811e+07	5.25983e+07	6.71972e+07	6.36341e+07	High	High	High
	VTQLTDR	5	1	1	CON_00686447.3		832.452	7.44707e+07	0	0.0154	High	1.88337	1.74793	1.75518	High		High	1.76287	1.65776	0	2.58574e+07	27354429	0	3.89572e+07	5.05869e+07		High	High
	AESGPDLR	9	1	1	CON_00686447.3		844.417	6.44808e+07	0	0.09836	High	1.69031	1.73109	1.09787	High	1.79967	High	1.78293	1.81144	0	33020021	1.5944e+07	3.16774e+07	39430536	4.14319e+07	High	High	High
	QMGQPCDAYQK	6	1	1	CON_00686447.3	M2(Oxidation); C6(Carbamidomethyl)	1341.56	32140624	0	0.0007326	High	1.99614	2.11406	2.31623	High	2.23473	High	1.9746	1.93049	0	19771672	2.85658e+07	1.68355e+07	2.41882e+07	1.57935e+07	High	High	High
	ETQSQLETER	12	1	1	CON_00686447.3		1220.58	115136767	0	0.04659	High	2.30534	2.36515	2.31634	High	2.38444	High	2.39236	1.99128	0	68389474	9.11936e+07	72785055	95909255	6.64829e+07	High	High	High
	ALCDYK	9	4	2	CON_00686447.3;XBXL10_1g27608	C3(Carbamidomethyl)	769.354	2.36018e+07	0	0.007605	High	1.33291	1.09043	1.11821	High	1.04769	High	1.04936	1.0631	0	2.63109e+07	3.96729e+07	31949570	4.01747e+07	2.48241e+07	High	High	High
	NQCTQVVQER	8	1	1	CON_00686447.3	C3(Carbamidomethyl)	1261.6	158666524	0	0.01784	High	2.2536	2.27525	2.21708	High	2.48847	High	2.25565	2.3731	0	1.34492e+08	1.44752e+08	52204176	149820257	0	High	High	High
	IVQLKPR	6	2	2	CON_00686447.3;XBXL10_1g27608		853.561	30105141	0	0.07556	High	1.31117	1.31905	1.01115	High	1.26059	High	1.29307	0.912654	0	21774593	3.18365e+07	1.87265e+07	21184284	1.83185e+07	High	High	High
	IVHKGDECILK	3	1	1	CON_00686447.3	C8(Carbamidomethyl)	1311.71	47007148	0	0.002263	High	2.35764	2.26431	2.58946	High		High			1	3.29862e+07	5.09468e+07	0	0	0
	EYENELAK	5	1	1	CON_00686447.3		995.467	4.71346e+07	0	0.06629	High	1.47154	1.58578	1.47323	High	1.55464	High	1.71367		0	31739565	52419106	34511374	44495405	0	High	High
	YQAECSQFK	6	1	1	CON_00686447.3	C5(Carbamidomethyl)	1160.5	78394942	0	0.01517	High	2.21926	2.19679	1.87623	High	2.10594	High	2.25517	1.88899	0	72221886	100891723	4.87231e+07	9.647e+07	34665523	High	High	High
	GDECILK	5	2	2	CON_00686447.3;XBXL10_1g27608	C4(Carbamidomethyl)	834.404	0	0	0.02158	High	1.57588	1.27715	1.40081	High	1.42836	High	1.72857		0	35112036	3.52458e+07	2.36239e+07	3.61035e+07	0	High	High
	VTQLTDRWQR	7	1	1	CON_00686447.3		1302.69	191743584	0	0.005571	High	1.7022	1.56	0.930181	High	1.22227	High	1.4393	1.48029	1	180404226	0	1.42659e+08	1.85583e+08	1.33749e+08	High	High	High
	FLDQNLQK	5	2	2	CON_00686447.3;XBXL10_1g27608		1005.54	341062648	0	0.002116	High	2.12791	1.89518		High	1.8307		1.96478	1.56337	0	249233672	0	175457528	265123552	188553316	High	High	High
	NKYETEINITK	7	2	2	CON_00686447.3;XBXL10_1g27608		1352.71	81750497	0	0.014	High	2.84316	2.69749	2.91426	High	2.41813	High	2.17539	2.91305	1	53018457	91502547	28249908	4.98607e+07	4.345e+07	High	High	High
	QEAFSIR	6	1	1	CON_00686447.3		850.442	176926001	0	0.01915	High	2.15321	1.91904	2.03275	High	1.6508	High	1.02332	1.51931	0	155946208	1.89696e+08	9.84121e+07	106669884	78486164	High	High	High
	ESHRLPVDIAYKR	6	1	1	CON_00686447.3		1583.86	0	0	2.126e-06	High	4.6917	4.02154	4.37455	High	3.87092	High	3.54747		2	90187502	0	0	51937082	0	High	High
	LTYEIEDEK	10	1	1	CON_00686447.3		1139.55	289769684	0	0.04055	High	2.03275	2.10642	2.18048	High	2.20915	High	2.15652	2.15616	0	222746380	259145476	1.91731e+08	2.54522e+08	189622292	High	High	High
	IAELCANSIK	9	1	1	CON_00686447.3	C5(Carbamidomethyl)	1118.59	2.04752e+08	0	0.0002186	High	2.72357	2.70948	2.71736	High	2.18095	High	2.70494	2.54727	0	1.7294e+08	2.5222e+08	1.4556e+08	2.10196e+08	1.09194e+08	High	High	High
	ESHRLPVDIAYK	5	1	1	CON_00686447.3		1427.77	55248130	0	0.0005149	High	2.9008		3.72495		3.4299	High	3.45746	2.66116	1	0	1.02089e+08	5.48553e+07	54180549	4.01154e+07	High	High	High
	EHLMLEEELR	4	1	1	CON_00686447.3	M4(Oxidation)	1314.63	40998065	0	0.05262	High	1.79315				1.83063		1.22143	2.44042	0	0	0	2.15252e+07	1.86537e+07	27055171	High	High	High
	QLQNIIQATSR	12	1	1	CON_00686447.3		1271.71	430631648	0	0.006631	High	3.26806	2.92129	3.26902	High	3.21013	High	3.79843	3.70604	0	2.51538e+08	3.11716e+08	2.14224e+08	260320398	237681264	High	High	High
	QQIQNDLNQWK	12	1	1	CON_00686447.3		1414.71	420168128	0	0.001095	High	2.83941	2.9335	3.39022	High	3.09615	High	2.90627	3.20053	0	271593673	354576496	204516610	311155306	2.31332e+08	High	High	High
	NQFETEINITK	6	1	1	CON_00686447.3		1336.68	43472319	0	0.0006306	High	2.72443	2.10563	2.4358	High	2.23775	High	2.1039	2.10386	0	20538099	42644825	22828459	3.69645e+07	2.36786e+07	High	High	High
	YIELLTR	12	2	2	CON_00686447.3;XBXL10_1g27608		907.525	336639998	0	0.01042	High	1.66207	1.61233	1.89991	High	1.62335	High	1.62855	2.04833	0	320003592	407904900	2.56953e+08	276728821	242856896	High	High	High
	AELIVQPELK	12	1	1	CON_00686447.3		1139.67	225631292	0	0.0001856	High	2.38979	2.55267	2.28686	High	2.22204	High	2.22114	2.22657	0	208808600	236855666	1.67151e+08	213798446	1.36183e+08	High	High	High
	GGGGYTCQSGSGWDEFTK	10	1	1	CON_00686447.3	C7(Carbamidomethyl)	1893.77	145312431	0	0.002232	High	3.24288	3.64641	3.61771	High	3.78818	High	3.56352	2.70235	0	147911681	185154878	114496949	149064275	65513747	High	High	High
	IEVLEEELR	11	1	1	CON_00686447.3		1129.61	294839906	0	0.009213	High	2.34245	2.06955	2.09821	High	2.30863	High	2.22011	2.37284	0	214845908	262914756	2.44667e+08	305937424	237670228	High	High	High
	LTEEETVCLDLDK	7	1	1	CON_00686447.3	C8(Carbamidomethyl)	1564.74	1.96095e+07	0	3.354e-06	High	2.93041	3.40444	2.84377	High	2.844	High	2.86906	2.85799	0	37877314	27992591	3.17237e+07	4.0286e+07	2.32431e+07	High	High	High
	GLVGIEFK	12	1	1	CON_00686447.3		862.503	132382395	0	0.08668	High	1.49845	1.49303	1.60394	High	1.59081	High	1.77843	1.56379	0	1.2218e+08	1.15918e+08	7.99533e+07	0	6.0978e+07	High	High	High
	NTKIEVLEEELR	4	1	1	CON_00686447.3		1472.8	52116619	0	9.385e-06	High	3.02974		3.4101			High		1.91986	1	0	68551581	0	0	7.69879e+06			High
	AQQIHSQTSQQYPLYDLDLGK	9	1	1	CON_00686447.3		2433.2	493382369	0	0.0024	High	6.21224	6.15601	6.34418	High	6.76411	High	5.55468	6.75351	0	269086560	448919234	2.41554e+08	333086353	308549379	High	High	High
	LLEAQIATGGIIDPK	7	2	2	CON_00686447.3;XBXL10_1g27608		1538.88	127495284	0	1.413e-06	High	3.14959		4.04453		2.84482	High	3.76041	2.63119	0	0	125724521	48821209	0	58246822	High	High	High
	DFLQGSSCIAGIYNETTK	7	1	1	CON_00686447.3	C8(Carbamidomethyl)	2003.94	57382703	0	3.71e-08	High	4.87227	3.17473	4.53597	High	4.07995	High	3.32782	4.18034	0	45516437	88281369	39199781	55555382	2.09379e+07	High	High	High
	DEETGLCLLPLK	2	1	1	CON_00686447.3	C7(Carbamidomethyl)	1387.71	110385394	0	6.764e-06	High	3.75234		2.90595			High			0	0	0	0	0	0
	RGYFNEELSEILSDPSDDTK	7	1	1	CON_00686447.3		2315.07	5.80354e+07	0	1.398e-08	High	5.68282	4.82822	5.16547	High	4.632	High	5.31742		1	31351991	36129763	0	3.38271e+07	0	High	High
	SVEEVASEIQPFLR	5	1	1	CON_00686447.3		1603.83	41735050	0	6.405e-06	High	2.69908	1.54589	3.12867	High	2.97001	High	2.645		0	40051399	25616628	1.51796e+07	3.14386e+07	0	High	High
	AVTGYNDPETGNIISLFQAMNK	11	1	1	CON_00686447.3	M20(Oxidation)	2399.15	7.18487e+07	0	9.04e-06	High	4.75826	4.65416	4.84181	High	4.65304	High	4.30974	4.03147	0	5.26379e+07	69264653	5.57679e+07	5.01404e+07	3.49737e+07	High	High	High
	GFFDPNTEENLTYLQLK	22	2	2	CON_00686447.3;XBXL10_1g27608		2028.99	3.86923e+08	0	2.632e-07	High	4.05279	3.61604	4.4631	High	4.01228	High	3.95327	4.06924	0	2.66111e+08	333501085	1.89933e+08	2.39571e+08	1.18802e+08	High	High	High
	TLELQGLINDLQR	17	1	1	CON_00686447.3		1512.84	195639081	0	0.004929	High	3.17013	3.08753	3.16714	High	3.03896	High	3.20401	2.99424	0	112237320	131605172	78072554	109599094	9.77481e+07	High	High	High
	GYFNEELSEILSDPSDDTK	13	1	1	CON_00686447.3		2158.97	241609318	0	0.0001922	High	3.92533	3.97635	4.2398	High	4.53356	High	4.35671	3.17194	0	148533864	175267948	110085970	144332220	8.44797e+07	High	High	High
	ALLQAILQTEDMLK	16	1	1	CON_00686447.3	M12(Oxidation)	1602.88	198350584	0	0.01521	High	3.15873	3.57351	3.53254	High	3.55079	High	3.59692	3.17369	0	144366722	2.21183e+08	102309132	71921531	1.05252e+08	High	High	High
	YCYLQNEVFGLFQK	6	1	1	CON_00686447.3	C2(Carbamidomethyl)	1808.87	0	0	4.744e-08	High	3.50551	3.63316	3.53989	High		High	2.78619	2.73567	0	0	138569006	0	0	29880919		High	High
	ENAAYFQFFEEAQSTEAYLK	5	1	1	CON_00686447.3		2386.09	47230834	0	4.892e-08	High	4.38726							4.31993	0	0	0	0	0	2.29576e+07			High
	SAIYQLEEEYENLLK	19	1	1	CON_00686447.3		1841.92	315623001	0	4.622e-07	High	3.70635	4.42517	4.45577	High	3.58198	High	4.18413	4.20941	0	224823702	285089728	169911542	2.35153e+08	1.62926e+08	High	High	High
	AVTGYNDPETGNIISLFQAMNK	1	1	1	CON_00686447.3		2383.16	29282199	0	7.519e-05	High	3.5757								0	0	0	0	0	0
	ALLQAILQTEDMLK	1	1	1	CON_00686447.3		1586.88	3.80031e+07	0	1.205e-07	High	3.18816								0	0	0	0	0	0
	IGLVRPGTALELLEAQAATGFIVDPVSNLR	7	1	1	CON_00686447.3		3120.75	43772306	0	1.079e-06	High	5.8094	6.33715	6.31964	High	6.34123	High	5.91848		0	6.11237e+07	4.36412e+07	32537259	0	0	High	High
	IGLVRPGTALELLEAQAATGFIVDPVSNLRLPVEEAYK	6	1	1	CON_00686447.3		4050.22	33156375	0	5.741e-09	High	6.19074	7.02267	8.31932	High	7.11613	High	6.95399		1	45323010	68830893	60424900	0	0	High	High
	ALCDYKQDQK	3	2	2	CON_00686447.3;XBXL10_1g27608	C3(Carbamidomethyl)	1268.6	0	0	0.05064			1.4549	1.51169	High		High	1.83765		1	2.18511e+07	3.69133e+07	0	15421746	0		High
	LGIYEAMK	6	1	1	CON_00686447.3	M7(Oxidation)	940.481	0	0	0.07115			1.416	1.0799	High	1.42729	High	0.93701	1.04894	0	3.79794e+07	6.85421e+07	4.31171e+07	4.33705e+07	28378201	High	High	High
	RLLQLQEQMR	1	1	1	CON_00686447.3	M9(Oxidation)	1330.72	0	0	0.01871			2.40021		High					1	29156044	0	0	0	0
	VVIVDPETNK	4	1	1	CON_00686447.3		1113.61	0	0	0.0002421			2.31477	2.72986	High		High	2.41587	2.34307	0	92265180	89447658	0	100474249	6.11983e+07		High	High
	ITRLTYEIEDEK	4	1	1	CON_00686447.3		1509.78	0	0	0.0008413			2.85111	2.32892	High	2.31655	High		1.58745	1	23250184	8.36579e+07	2.31066e+07	0	1.54576e+07	High		High
	NQCTQVVQERESLLVK	2	1	1	CON_00686447.3	C3(Carbamidomethyl)	1931.01	0	0	0.004167			4.15836	3.26873	High		High			1	6.10577e+07	0	0	0	0
	CIKDEETGLCLLPLK	1	1	1	CON_00686447.3	C1(Carbamidomethyl); C10(Carbamidomethyl)	1788.93	0	0	4.74e-05			3.23884		High					1	4.9721e+07	0	0	0	0
	VRNHYNEEMSNLR	1	1	1	CON_00686447.3	M9(Oxidation)	1677.78	0	0	8.331e-06				2.85584			High			1	0	1.26487e+07	0	0	0
	FGDSNTVMR	4	1	1	CON_00686447.3	M8(Oxidation)	1042.46	0	0	0.1063				2.02393		1.91499	High	1.48165	2.0431	0	0	3.10092e+07	20414728	1.65095e+07	23406955	High	High	High
	IKNDLNLK	2	1	1	CON_00686447.3		957.573	0	0	0.01829				1.20747			High		1.07207	1	0	1.48125e+07	0	0	6.46918e+06			High
	DMLANFRGSEK	4	1	1	CON_00686447.3	M2(Oxidation)	1283.6	0	0	0.07216				1.86751		2.25044	High	2.36196	1.90819	1	0	17769504	2.17719e+07	2.72969e+07	13592042	High	High	High
	RGLVGIEFK	2	1	1	CON_00686447.3		1018.6	0	0	0.008532				1.3979		1.66655	High			1	0	6.9655e+07	2.279e+07	0	0	High
	IGLVRPGTALELLEAQAATGFIVDPVSNLRLPVEEAYKR	1	1	1	CON_00686447.3		4206.33	0	0	5.865e-08				4.43414			High			2	0	4.3059e+07	0	0	0
	NSQGSEMFGDDDK	1	1	1	CON_00686447.3	M7(Oxidation)	1445.55	0	0	0.06152						1.35713				0	0	0	8.46414e+06	0	0	High
	LKQESDQLVLNQHPASDK	4	1	1	CON_00686447.3		2050.06	0	0	0.008849						4.1498		4.11101	3.5191	1	0	0	2.15636e+07	2.50482e+07	8.12504e+06	High	High	High
	QESDQLVLNQHPASDK	1	1	1	CON_00686447.3		1808.88	0	0	0.01705						3.51695				0	0	0	19351348	0	0	High
	QQLEVELR	1	1	1	CON_00686447.3		1014.56	0	0	0.07276						2.33947				0	0	0	2.18841e+07	0	0	High
	HQNQNTIQELLQNCSDCLMR	1	1	1	CON_00686447.3	C14(Carbamidomethyl); C17(Carbamidomethyl); M19(Oxidation)	2518.12	0	0	0.0002536								5.21025		0	0	0	0	47322803	0		High
	SGDYYR	6	1	1	CON_00686447.3		760.326	7.35013e+07	0.001	0.02878	High	1.77719	1.6568	1.74934	High		High	1.51272		0	7.40492e+07	27868813	0	9.96011e+06	0		High
	NDLNLKK	1	1	1	CON_00686447.3		844.489	46130039	0.001	0.02135	High	1.72176								1	0	0	0	0	0
	ILEYKR	4	1	1	CON_00686447.3		821.488	38481900	0.001	0.03316	High	1.38861	1.40988	1.37264	High	1.0533	High			1	1.5499e+07	2.0585e+07	12890018	0	0	High
	SNKPIILR	2	1	1	CON_00686447.3		940.593	0	0.001	0.1301			0.919562		High			0.997029		0	45165112	0	0	41022100	0		High
	MSQLEVK	3	1	1	CON_00686447.3	M1(Oxidation)	850.434	0	0.001	0.1581						1.76004		1.26401	1.58825	0	0	0	1.52401e+07	21825290	1.72976e+07	High	High	High
	WLYDAK	4	1	1	CON_00686447.3		795.404	59652069	0.002	0.2101	High	1.50167		1.4782		1.51337	High	1.52951		0	0	62321994	3.79879e+07	5.70403e+07	0	High	High
	QALEASNRIQESK	3	1	1	CON_00686447.3		1473.76	0	0.002	0.05806			3.0163	3.79791	High		High	2.74102		1	10509134	2.10535e+07	0	0	0		High
	RRQDSLESMK	1	1	1	CON_00686447.3	M9(Oxidation)	1265.63	0	0.002	0.18								1.87651		2	0	0	0	1.36112e+07	0		High
	ELQLQK	2	6	1	CON_00686447.3		758.44	0	0.002	0.2035								1.47388	1.3569	0	0	0	0	3.5925e+07	24398218		High	High
	LRLDYER	3	1	1	CON_00686447.3		964.52	26048147	0.003	0.05421	High	2.05742		1.82454		1.58784	High			1	0	3.7766e+07	2.76235e+07	0	0	High
	LWDLEK	14	1	1	CON_00686447.3		803.43	280344317	0.003	0.06998	High	1.54751	1.76873	1.52583	High	1.85224	High	2.07534	1.53855	0	123741388	116577698	9.87091e+07	1.51197e+08	203838925	High	High	High
	CYGQIK	1	1	1	CON_00686447.3	C1(Carbamidomethyl)	768.371	0	0.003	0.195								1.74855		0	0	0	0	3.8745e+07	0		High
	FLNEQK	7	1	1	CON_00686447.3		778.41	1.92826e+08	0.004	0.1268	High	1.67954	1.34297	1.31714	High	1.2254	High		1.28392	0	1.54133e+08	235513122	1.17554e+08	0	129159607	High		High
	ASFERMDHLR	1	1	1	CON_00686447.3	M6(Oxidation)	1277.61	0	0.004	0.2629						1.40988				1	0	0	1.83161e+07	0	0	High
	GLQDSIR	3	1	1	CON_00686447.3		788.426	69611536	0.005	0.2676	High	1.44754		1.43797		1.40852	High			0	0	79323156	61267588	0	0	High
	LTVDSAIAR	2	1	1	CON_00686447.3		945.536	63264890	0.005	0.1675	High	1.27256		1.34105			High			0	0	0	0	0	0
	SLLATMK	4	1	1	CON_00686447.3	M6(Oxidation)	779.434	31057136	0.006	0.3054	High	1.31102		0.925606		1.13184	High	1.29177		0	0	0	25007420	0	0	High	High
	LQDTSTYGK	1	1	1	CON_00686447.3		1012.5	0	0.006	0.3041						1.02972				0	0	0	0	0	0	High
	KLEEELEGMRR	2	1	1	CON_00686447.3	M9(Oxidation)	1405.71	0	0.008	0.3478						1.19072		1.13387		2	0	0	16478007	1.30446e+07	0	High	High
CON_IPI00241841.9	SWISS-PROT:Q5XKE5 Tax_Id=9606 Gene_Symbol=KRT79 Keratin, type II cytoskeletal 79	27.1	2	5	17	499	2.03802e+10	15218232999	1.58811e+10	1.09065e+10	1.43654e+10	1.15395e+10	201.394	17.2	13	81	226.832	20.93	14	91	298.655	170.371	190.67	125.338	14.39	20	16.26	19.07	11	14	13	14	123	72	79	53	535	57.7741	7.1958
	Sequence	# PSMs	# Proteins	# Protein Groups	Protein Group Accessions	Modifications	MH+ [Da]	A5: Area	q-Value	PEP	A6	XCorr A6	XCorr B6	XCorr C6	B6	XCorr D6	C6	XCorr E6	XCorr F6	# Missed Cleavages	B5: Area	C5: Area	D5: Area	E5: Area	F5: Area	D6	E6	F6
	FLEQQNK	21	50	20	CON_IPI00290857.2;CON_107456;CON_00300725.7;CON_IPI00554648.3;CON_IPI00306959.10;CON_00009867.3;CON_00299145.9;CON_106456;CON_105456;CON_00166205.2;CON_00293665.7;CON_00697851.1;CON_00124800.2;CON_00221797.1;CON_IPI00241841.9;XBXL10_1g8290;XBXL10_1g8291;XBXL10_1g10877;XBXL10_1g10870;XBXL10_1g10871		906.468	2.22081e+09	0	0.1134	High	1.69707	1.73364	1.60086	High	1.57643	High	1.55466	1.64136	0	1627774338	1836262672	1.19747e+09	1.94041e+09	1.03942e+09	High	High	High
	YEDEINK	32	43	20	CON_IPI00290857.2;CON_00300725.7;CON_IPI00554648.3;CON_00009867.3;CON_00299145.9;XBXL10_1g8291;CON_00220327.3;CON_00021304.1;CON_00293665.7;CON_00697851.1;CON_00221797.1;CON_00462140.1;CON_00622240.4;CON_IPI00376379.3;CON_IPI00241841.9;XBXL10_1g8295;XBXL10_1g8289;XBXL10_1g10877;XBXL10_1g10870;XBXL10_1g10871		910.416	15922380192	0	0.01896	High	2.1327	2.12545	1.91357	High	1.77495	High	1.92556	1.81321	0	8.65848e+09	11362991318	9786637980	9.7915e+09	9.50114e+09	High	High	High
	NKYEDEINK	25	23	12	CON_00300725.7;CON_IPI00554648.3;CON_00009867.3;CON_00299145.9;XBXL10_1g8291;CON_00220327.3;CON_00293665.7;CON_00697851.1;CON_00462140.1;CON_IPI00241841.9;XBXL10_1g8295;XBXL10_1g8289		1152.55	3188012410	0	0.08708	High	3.33727	3.50497	3.04553	High	3.26906	High	3.60094	3.18381	1	1.64644e+09	1.84262e+09	1.13915e+09	1.44402e+09	1.59798e+09	High	High	High
	VRFLEQQNK	22	50	20	CON_IPI00290857.2;CON_107456;CON_00300725.7;CON_IPI00554648.3;CON_IPI00306959.10;CON_00009867.3;CON_00299145.9;CON_106456;CON_105456;CON_00166205.2;CON_00293665.7;CON_00697851.1;CON_00124800.2;CON_00221797.1;CON_IPI00241841.9;XBXL10_1g8290;XBXL10_1g8291;XBXL10_1g10877;XBXL10_1g10870;XBXL10_1g10871		1161.64	4228717839	0	0.01767	High	2.65454	2.71945	2.56823	High	2.672	High	2.65601	2.5828	1	3.39655e+09	4087371328	2.19974e+09	2.78177e+09	1985595236	High	High	High
	DYQELMNVK	5	5	3	CON_IPI00290857.2;CON_00021304.1;CON_IPI00241841.9	M6(Oxidation)	1155.54	0	0	0.01393	High	1.81661	1.9335		High	1.86824		1.92287		0	8.02178e+07	0	62120528	0	0	High	High
	KLGDLDVALHQAK	2	1	1	CON_IPI00241841.9		1407.79	32253256	0	5.688e-07	High	4.1335	4.77264		High					1	4.6759e+07	0	0	0	0
	FASFIDK	17	52	24	CON_IPI00290857.2;CON_00300725.7;CON_IPI00554648.3;CON_IPI00306959.10;CON_00009867.3;CON_00299145.9;CON_IPI00174775.2;XBXL10_1g8291;CON_105456;CON_IPI00290078.5;CON_00021304.1;CON_00293665.7;CON_00697851.1;CON_00221797.1;CON_00347096.2;CON_00462140.1;CON_00622240.4;CON_IPI00376379.3;CON_IPI00241841.9;CON_00705721.2;XBXL10_1g8295;XBXL10_1g8290;XBXL10_1g10877;XBXL10_1g8289		827.43	20889928652	0	0.01631	High	1.92991	1.93893	1.85944	High	1.86668	High	1.68189	1.85885	0	16666804464	18271764520	10620704572	15494635570	1.1965e+10	High	High	High
	LLRDYQELMNVK	35	4	3	CON_IPI00290857.2;CON_00021304.1;CON_IPI00241841.9	M9(Oxidation)	1537.81	3989037768	0	6.602e-06	High	4.65285	4.31071	4.41015	High	4.3294	High	4.48099	4.54444	1	1656575984	1.67459e+09	805257340	1196642715	2458973840	High	High	High
	DYQELMNVK	2	5	3	CON_IPI00290857.2;CON_00021304.1;CON_IPI00241841.9		1139.54	132407220	0	0.01085	High	1.76039							1.61673	0	0	0	0	0	15415408			High
	LALDVEIATYRK	187	19	10	CON_IPI00290857.2;CON_00300725.7;CON_00009867.3;CON_00299145.9;CON_00021304.1;CON_00293665.7;CON_00697851.1;CON_00221797.1;CON_IPI00241841.9;XBXL10_1g8291		1391.79	7597148856	0	0.001571	High	3.94584	3.84747	3.93288	High	3.94186	High	3.85479	3.99987	1	10426772410	1.11043e+10	5.15464e+09	5.4941e+09	2.00012e+09	High	High	High
	LLRDYQELMNVK	17	4	3	CON_IPI00290857.2;CON_00021304.1;CON_IPI00241841.9		1521.81	2977459032	0	1.222e-06	High	4.33168	4.24955	4.14374	High	3.84332	High	3.84552	3.99919	1	8.59941e+08	1157149710	3.15926e+08	376860695	514086193	High	High	High
	LALDVEIATYR	54	25	10	CON_IPI00290857.2;CON_00300725.7;CON_00009867.3;CON_00299145.9;CON_00021304.1;CON_00293665.7;CON_00697851.1;CON_00221797.1;CON_IPI00241841.9;XBXL10_1g8291		1263.69	790710142	0	0.004243	High	2.71855	2.46588	2.97101	High	2.82559	High	2.99738	2.61927	0	862913883	1289158834	604167874	741664298	61439000	High	High	High
	NLDLDSIIAEVK	56	12	6	CON_00300725.7;CON_00009867.3;CON_00299145.9;CON_00021304.1;CON_00293665.7;CON_IPI00241841.9		1329.73	2.43282e+10	0	8.066e-05	High	3.6254	3.80636	3.56252	High	3.37938	High	3.49304	3.63853	0	18561122123	18008597792	12312209872	17810070764	13152456286	High	High	High
	SSGSGGGAHCGPGTGGFGSR	2	1	1	CON_IPI00241841.9	C10(Carbamidomethyl)	1749.74	0	0	0.006149			2.75228		High	2.39338				0	1.17538e+07	0	4.73912e+06	0	0	High
	YEELQVTAGK	4	2	1	CON_IPI00241841.9		1137.58	0	0	0.0003874			2.1545		High	1.87849		1.77287	1.22857	0	27989750	0	2.0756e+07	19966933	2.28818e+07	High	High	High
	LLESEESR	4	3	2	CON_00347096.2;CON_IPI00241841.9		962.478	0	0	0.002053				1.31696		1.04981	High	1.29815	1.29358	0	0	1.19549e+07	9.80233e+06	1.38792e+07	8.5814e+06	High	High	High
	QCQQLQTAIAEAEQR	1	1	1	CON_IPI00241841.9	C2(Carbamidomethyl)	1773.85	0	0	0.006937									3.54826	0	0	0	0	0	6.44659e+06			High
	GRLDSELR	12	10	6	CON_00300725.7;CON_00009867.3;CON_00299145.9;CON_00293665.7;CON_00697851.1;CON_IPI00241841.9		945.511	2470876328	0.001	0.03713	High	2.35241	2.29886	2.33427	High	2.29137	High	2.30828	2.29604	1	1298220822	1.34737e+09	7.7889e+08	1213129136	1.13014e+09	High	High	High
	ALGGFGFGSR	1	1	1	CON_IPI00241841.9		968.495	2.74691e+07	0.002	0.04949	High	1.57172								0	0	0	0	0	0
CON_00912554.1	(Bos taurus) Gene_Symbol=LOC100138974 similar to Keratin 10 (epidermolytic hyperkeratosis; keratosis palmaris et plantaris) isoform 2 - [REFSEQ:XP_001788780]	16.78	5	1	16	495	7.2578e+10	4.86702e+10	41280936162	2.91797e+10	4.23505e+10	38791518302	195.541	15.02	14	84	199.189	16.78	16	84	183.509	169.778	197.233	176.104	16.78	16.78	16.78	16.78	15	16	16	15	83	81	84	79	566	59.3465	5.12256
	Sequence	# PSMs	# Proteins	# Protein Groups	Protein Group Accessions	Modifications	MH+ [Da]	A5: Area	q-Value	PEP	A6	XCorr A6	XCorr B6	XCorr C6	B6	XCorr D6	C6	XCorr E6	XCorr F6	# Missed Cleavages	B5: Area	C5: Area	D5: Area	E5: Area	F5: Area	D6	E6	F6
	LASYLDK	48	25	13	CON_00217963.3;CON_00450768.7;CON_00009865.2;CON_00019359.3;CON_00384444.5;CON_00136056.1;CON_00225378.3;CON_IPI00290077.1;CON_00721270.3;CON_00912554.1;XBXL10_1g38958;XBXL10_1g38951;XBXL10_1g38957		809.44	60787022168	0	0.1013	High	2.05419	2.15733	1.9115	High	1.9521	High	2.09405	1.9971	0	42043828040	38071526344	2.88528e+10	39374069632	34696907176	High	High	High
	IKEWYEK	11	6	5	CON_00009865.2;CON_00798492.2;CON_00698285.3;CON_00912554.1;XBXL10_1g38951		995.519	0	0	0.1027	High	1.67226	1.71723	1.77567	High	1.83061	High	1.83161	1.84758	1	1183595606	5.99349e+08	332223808	4.74372e+08	42052645	High	High	High
	SEITELR	16	4	4	CON_00009865.2;CON_00798492.2;CON_00912554.1;XBXL10_1g42200		847.45	1588151145	0	0.01522	High	1.84996	2.10419	1.87327	High	1.84898	High	1.87878	1.85938	0	1062894964	779639085	854085216	1577299310	823304597	High	High	High
	LAADDFR	34	52	18	CON_00217963.3;CON_00450768.7;CON_109456;CON_00009865.2;CON_00136056.1;CON_00798492.2;CON_00912554.1;CON_18266793;CON_00384444.5;CON_00225378.3;CON_IPI00290077.1;CON_00721270.3;CON_IPI00418663.3;CON_00698285.3;CON_00708921.1;XBXL10_1g8279;XBXL10_1g38935;XBXL10_1g42200		807.4	8.7171e+10	0	0.01073	High	1.85348	2.01395	1.96806	High	1.91594	High	1.85693	1.89971	0	5.03039e+10	41248418266	2.78356e+10	45688204091	43680490412	High	High	High
	LENEIQTYR	12	3	3	CON_00009865.2;CON_00798492.2;CON_00912554.1		1165.58	2030885533	0	0.0004119	High	3.50167	2.83593	2.85261	High	2.83196	High	2.84944	2.84067	0	1.07453e+09	880996218	653748193	1320428013	1030995404	High	High	High
	DAEAWFNEK	72	6	4	CON_IPI00328103.3;CON_00009865.2;CON_IPI00418663.3;CON_00912554.1		1109.49	47934446700	0	0.0002535	High	2.58321	2.38568	2.84961	High	2.3241	High	2.56989	2.39423	0	41488650126	36592959812	26836207550	36940999348	24922236054	High	High	High
	QSVEADINGLRR	47	9	5	CON_00009865.2;CON_00009866.6;CON_00136056.1;CON_00798492.2;CON_00912554.1		1357.72	57524544836	0	0.04229	High	3.26707	3.31283	3.32336	High	3.25643	High	3.37518	3.33663	1	42197467170	34736767401	2.15045e+10	3.63652e+10	30781234112	High	High	High
	LAADDFRLK	10	19	10	CON_00009865.2;CON_00136056.1;CON_00798492.2;CON_00912554.1;CON_00225378.3;CON_IPI00290077.1;CON_IPI00418663.3;CON_00698285.3;XBXL10_1g42200;CON_18266793		1048.58	68838516	0	0.0001208	High	1.87086	2.4655	2.54109	High	2.37424	High	2.37455	2.30443	1	3719205489	5.7049e+09	1.80482e+09	1.25339e+09	0	High	High	High
	IRLENEIQTYR	67	2	2	CON_00009865.2;CON_00912554.1		1434.77	32786695448	0	0.03277	High	4.14446	4.05609	3.95718	High	4.27352	High	3.99271	4.16417	1	28544551680	30315167424	20586598136	29880617476	24305759712	High	High	High
	QSVEADINGLR	24	10	5	CON_00009865.2;CON_00136056.1;CON_00798492.2;CON_00912554.1;CON_00009866.6		1201.62	6887530214	0	0.0004507	High	2.66978	2.44976	1.97447	High	1.56599	High	1.90262	1.84655	0	3.99556e+09	3.4347e+09	2.09956e+09	4041833371	3103401748	High	High	High
	RVLDELTLTK	31	2	2	CON_00009865.2;CON_00912554.1		1187.7	6.61526e+09	0	0.002996	High	3.39117	3.11243	3.22767	High	3.23142	High	3.24889	3.12603	1	4721575716	4350452226	2606126967	3587687248	3022992616	High	High	High
	VLDELTLTK	46	2	2	CON_00009865.2;CON_00912554.1		1031.6	69776093860	0	0.00719	High	2.44014	2.28635	2.30479	High	2.29315	High	2.33201	2.2925	0	53509273496	44522863876	30850626678	41989088824	37997157318	High	High	High
	QSLEASLAETEGR	57	3	3	CON_00009865.2;CON_00798492.2;CON_00912554.1		1390.68	13934302480	0	0.008017	High	3.85419	3.25087	3.70078	High	3.50174	High	3.38829	3.8547	0	11365581008	4089475202	4529935584	7310016248	6001310992	High	High	High
	SAETSWDTNK	5	1	1	CON_00912554.1		1138.5	0	0	0.001607			1.94372	1.49803	High	1.41874	High	1.44122	1.40336	0	0	0	0	0	6.33726e+06	High	High	High
	QSVEADINGLRRVLDELTLTK	4	2	2	CON_00009865.2;CON_00912554.1		2370.3	0	0	0.1068			3.72421		High	4.04014		3.36964		2	42472687	0	200705103	0	0	High	High
	SEITELRR	11	4	4	CON_00009865.2;CON_00798492.2;CON_00912554.1;XBXL10_1g42200		1003.55	21183379928	0.001	0.1592	High	1.87412	2.09814	1.94207	High	1.95835	High	1.98782	1.74336	1	14821351708	1.27354e+10	7997727818	1.25285e+10	9.09296e+09	High	High	High
XBXL10_1g8291	XBmRNA15671| krt62.L	11.21	12	1	13	456	1.49444e+10	1.19174e+10	1.81596e+10	8.52066e+09	1.02601e+10	8.55008e+09	151.959	9.48	11	72	180.896	9.48	11	85	257.887	128.537	146.704	86.7342	9.48	9.48	11.21	9.48	11	11	12	11	116	65	72	46	580	59.8049	5.71924
	Sequence	# PSMs	# Proteins	# Protein Groups	Protein Group Accessions	Modifications	MH+ [Da]	A5: Area	q-Value	PEP	A6	XCorr A6	XCorr B6	XCorr C6	B6	XCorr D6	C6	XCorr E6	XCorr F6	# Missed Cleavages	B5: Area	C5: Area	D5: Area	E5: Area	F5: Area	D6	E6	F6
	NKYEDEINKR	50	20	11	CON_00300725.7;CON_IPI00554648.3;CON_00009867.3;CON_00299145.9;CON_00220327.3;CON_00293665.7;CON_00697851.1;CON_00462140.1;XBXL10_1g8295;XBXL10_1g8289;XBXL10_1g8291		1308.65	8020872852	0	0.01025	High	3.70003	3.46323	3.76139	High	3.93702	High	3.90545	3.5984	2	4453363553	4.38948e+09	3.29655e+09	4871622639	4.18404e+09	High	High	High
	YEDEINKR	24	40	19	CON_IPI00290857.2;CON_00300725.7;CON_IPI00554648.3;CON_00009867.3;CON_00299145.9;CON_00220327.3;CON_00021304.1;CON_00293665.7;CON_00697851.1;CON_00221797.1;CON_00462140.1;CON_00622240.4;CON_IPI00376379.3;XBXL10_1g8295;XBXL10_1g8289;XBXL10_1g8291;XBXL10_1g10877;XBXL10_1g10870;XBXL10_1g10871		1066.52	6456119504	0	0.008032	High	1.96031	1.94761	1.86407	High	1.85402	High	1.82619	1.92686	1	4.07321e+09	3694448402	4304846388	4.86375e+09	3934580898	High	High	High
	FLEQQNK	21	50	20	CON_IPI00290857.2;CON_107456;CON_00300725.7;CON_IPI00554648.3;CON_IPI00306959.10;CON_00009867.3;CON_00299145.9;CON_106456;CON_105456;CON_00166205.2;CON_00293665.7;CON_00697851.1;CON_00124800.2;CON_00221797.1;CON_IPI00241841.9;XBXL10_1g8290;XBXL10_1g8291;XBXL10_1g10877;XBXL10_1g10870;XBXL10_1g10871		906.468	2.22081e+09	0	0.1134	High	1.69707	1.73364	1.60086	High	1.57643	High	1.55466	1.64136	0	1627774338	1836262672	1.19747e+09	1.94041e+09	1.03942e+09	High	High	High
	YEDEINK	32	43	20	CON_IPI00290857.2;CON_00300725.7;CON_IPI00554648.3;CON_00009867.3;CON_00299145.9;XBXL10_1g8291;CON_00220327.3;CON_00021304.1;CON_00293665.7;CON_00697851.1;CON_00221797.1;CON_00462140.1;CON_00622240.4;CON_IPI00376379.3;CON_IPI00241841.9;XBXL10_1g8295;XBXL10_1g8289;XBXL10_1g10877;XBXL10_1g10870;XBXL10_1g10871		910.416	15922380192	0	0.01896	High	2.1327	2.12545	1.91357	High	1.77495	High	1.92556	1.81321	0	8.65848e+09	11362991318	9786637980	9.7915e+09	9.50114e+09	High	High	High
	LLEGEESR	6	18	5	CON_IPI00554648.3;CON_IPI00306959.10;XBXL10_1g8291;CON_105456;XBXL10_1g8290		932.469	1.03513e+08	0	0.01057	High	1.68179	1.33761		High	1.55677		1.48566	1.36341	0	3.37854e+07	0	29940111	2.74826e+07	2.75728e+07	High	High	High
	NKYEDEINK	25	23	12	CON_00300725.7;CON_IPI00554648.3;CON_00009867.3;CON_00299145.9;XBXL10_1g8291;CON_00220327.3;CON_00293665.7;CON_00697851.1;CON_00462140.1;CON_IPI00241841.9;XBXL10_1g8295;XBXL10_1g8289		1152.55	3188012410	0	0.08708	High	3.33727	3.50497	3.04553	High	3.26906	High	3.60094	3.18381	1	1.64644e+09	1.84262e+09	1.13915e+09	1.44402e+09	1.59798e+09	High	High	High
	VRFLEQQNK	22	50	20	CON_IPI00290857.2;CON_107456;CON_00300725.7;CON_IPI00554648.3;CON_IPI00306959.10;CON_00009867.3;CON_00299145.9;CON_106456;CON_105456;CON_00166205.2;CON_00293665.7;CON_00697851.1;CON_00124800.2;CON_00221797.1;CON_IPI00241841.9;XBXL10_1g8290;XBXL10_1g8291;XBXL10_1g10877;XBXL10_1g10870;XBXL10_1g10871		1161.64	4228717839	0	0.01767	High	2.65454	2.71945	2.56823	High	2.672	High	2.65601	2.5828	1	3.39655e+09	4087371328	2.19974e+09	2.78177e+09	1985595236	High	High	High
	EYQELMNVK	12	16	7	CON_00300725.7;CON_IPI00554648.3;CON_00299145.9;CON_00293665.7;CON_00221797.1;XBXL10_1g8291;XBXL10_1g8295	M6(Oxidation)	1169.55	3.00971e+08	0	0.01359	High	2.25551	2.14913	2.24799	High	2.18588	High	2.20179	2.24713	0	3.02686e+08	3.98298e+08	2.11778e+08	2.18878e+08	127182717	High	High	High
	EYQELMNVK	4	16	7	CON_00300725.7;CON_IPI00554648.3;CON_00299145.9;CON_00293665.7;CON_00221797.1;XBXL10_1g8291;XBXL10_1g8295		1153.56	194084114	0	0.002238	High	1.61892	1.86282	1.70218	High		High			0	8.51266e+07	123591687	0	0	0
	FASFIDK	17	52	24	CON_IPI00290857.2;CON_00300725.7;CON_IPI00554648.3;CON_IPI00306959.10;CON_00009867.3;CON_00299145.9;CON_IPI00174775.2;XBXL10_1g8291;CON_105456;CON_IPI00290078.5;CON_00021304.1;CON_00293665.7;CON_00697851.1;CON_00221797.1;CON_00347096.2;CON_00462140.1;CON_00622240.4;CON_IPI00376379.3;CON_IPI00241841.9;CON_00705721.2;XBXL10_1g8295;XBXL10_1g8290;XBXL10_1g10877;XBXL10_1g8289		827.43	20889928652	0	0.01631	High	1.92991	1.93893	1.85944	High	1.86668	High	1.68189	1.85885	0	16666804464	18271764520	10620704572	15494635570	1.1965e+10	High	High	High
	LALDVEIATYRK	187	19	10	CON_IPI00290857.2;CON_00300725.7;CON_00009867.3;CON_00299145.9;CON_00021304.1;CON_00293665.7;CON_00697851.1;CON_00221797.1;CON_IPI00241841.9;XBXL10_1g8291		1391.79	7597148856	0	0.001571	High	3.94584	3.84747	3.93288	High	3.94186	High	3.85479	3.99987	1	10426772410	1.11043e+10	5.15464e+09	5.4941e+09	2.00012e+09	High	High	High
	LALDVEIATYR	54	25	10	CON_IPI00290857.2;CON_00300725.7;CON_00009867.3;CON_00299145.9;CON_00021304.1;CON_00293665.7;CON_00697851.1;CON_00221797.1;CON_IPI00241841.9;XBXL10_1g8291		1263.69	790710142	0	0.004243	High	2.71855	2.46588	2.97101	High	2.82559	High	2.99738	2.61927	0	862913883	1289158834	604167874	741664298	61439000	High	High	High
	KLLEGEESR	1	16	4	CON_IPI00554648.3;CON_IPI00306959.10;XBXL10_1g8291;XBXL10_1g8290		1060.56	0	0	0.001803				1.6249			High			1	0	24843994094	0	0	0
	AKQDMALQLREYQELMNVK	1	2	1	XBXL10_1g8291	M5(Oxidation); M16(Oxidation)	2340.16	0	0.008	0.2881								2.20403		2	0	0	0	1.83007e+07	0		High
XBXL10_1g18988	XBmRNA35012| vtga2.L	45.43	1	62	79	404	2.07566e+09	2.34557e+09	2.39735e+08	0	0	0	583.203	44.49	77	181	525.482	44.05	71	164	156.36				25.07				40				59				1807	201.418	9.0415
	Sequence	# PSMs	# Proteins	# Protein Groups	Protein Group Accessions	Modifications	MH+ [Da]	A5: Area	q-Value	PEP	A6	XCorr A6	XCorr B6	XCorr C6	B6	XCorr D6	C6	XCorr E6	XCorr F6	# Missed Cleavages	B5: Area	C5: Area	D5: Area	E5: Area	F5: Area	D6	E6	F6
	HFETTGR	2	1	1	XBXL10_1g18988		847.405	2.79291e+07	0	0.01254	High	1.9604	2.13026		High					0	6.32166e+07	0	0	0	0
	STDFNNCQDK	5	1	1	XBXL10_1g18988	C7(Carbamidomethyl)	1228.49	148588256	0	8.74e-05	High	2.60734	2.55938	2.19272	High		High			0	1.52577e+08	1.02866e+07	0	0	0
	LTMKPAHTEGAIEK	4	2	2	XBXL10_1g18988;XBXL10_1g18989	M3(Oxidation)	1541.8	94446037	0	4.563e-05	High	3.1966	3.5965		High					0	36955715	0	0	0	0
	NNEQNILKK	5	1	1	XBXL10_1g18988		1100.61	9.97945e+07	0	0.000687	High	2.75124	2.89379	1.90769	High		High			1	9.34206e+07	0	0	0	0
	FEYSNGR	6	1	1	XBXL10_1g18988		872.389	3.84392e+08	0	0.004984	High	1.73221	1.53974	1.75485	High		High			0	3.47192e+08	4.7049e+07	0	0	0
	YVIQEDK	1	1	1	XBXL10_1g18988		894.457	0	0	0.01737	High	0.989076								0	0	0	0	0	0
	ALGNAGQPESIKR	5	1	1	XBXL10_1g18988		1340.73	8.06663e+08	0	9.509e-05	High	2.88433	2.7607	1.8431	High		High			1	7.58248e+08	1.38742e+07	0	0	0
	NNEQNILK	5	1	1	XBXL10_1g18988		972.511	374631984	0	0.002439	High	2.21744	2.55882	1.83265	High		High			0	425665152	39984607	0	0	0
	IQSPEIK	10	2	2	XBXL10_1g18988;XBXL10_1g18989		814.467	3.96046e+08	0	0.01671	High	1.85055	1.86574	1.5794	High		High			0	4.59116e+08	9.80157e+06	0	0	0
	NIADLDSARK	3	1	1	XBXL10_1g18988		1102.59	180907567	0	0.002836	High	1.88015	1.94023		High					1	165724114	0	0	0	0
	TCDVVIR	2	1	1	XBXL10_1g18988	C2(Carbamidomethyl)	862.446	64156146	0	0.01962	High	2.09721	1.99123		High					0	6.84224e+07	0	0	0	0
	ALGNAGQPESIK	5	1	1	XBXL10_1g18988		1184.63	1016735220	0	1.028e-05	High	3.10153	3.26567	2.84915	High		High			0	8.79835e+08	98584364	0	0	0
	YNLMAGAAAK	2	1	1	XBXL10_1g18988	M4(Oxidation)	1025.51	52685110	0	0.001029	High	2.10101	2.37816		High					0	59583639	0	0	0	0
	VTANWPK	12	2	2	XBXL10_1g18988;XBXL10_1g18989		815.437	1024619920	0	0.01615	High	1.86318	1.98153	1.91599	High		High			0	9.91463e+08	8.2014e+07	0	0	0
	NIADLDSAR	4	1	1	XBXL10_1g18988		974.49	2.78341e+08	0	0.009806	High	2.06269	2.14981		High					0	2.81388e+08	0	0	0	0
	VIQGAATYTYK	5	1	1	XBXL10_1g18988		1214.64	4.36293e+08	0	0.0001225	High	2.42728	2.1366	1.99746	High		High			0	383214762	0	0	0	0
	AGVHLCIQCK	3	1	1	XBXL10_1g18988	C6(Carbamidomethyl); C9(Carbamidomethyl)	1185.59	114013011	0	0.002544	High	2.61399	2.88366		High					0	1.17992e+08	0	0	0	0
	KYSAEPGHHQYAPNINSYDACTK	2	1	1	XBXL10_1g18988	C21(Carbamidomethyl)	2651.2	153496932	0	6.556e-07	High	4.84684	4.41549		High					1	194311266	0	0	0	0
	THIEPVFSESK	2	1	1	XBXL10_1g18988		1273.64	116006847	0	0.000416	High	2.66532	2.8413		High					0	1.20495e+08	0	0	0	0
	VEISAYAQR	3	2	2	XBXL10_1g18988;XBXL10_1g18989		1036.54	455476400	0	0.0004498	High	2.20381	2.37941	1.87317	High		High			0	4.741e+08	2.23399e+07	0	0	0
	AETGNFGNQPALR	8	1	1	XBXL10_1g18988		1374.67	497530500	0	2.48e-06	High	3.55842	3.42337	2.45372	High		High			0	467492106	0	0	0	0
	IQTDAVMALR	9	3	3	XBXL10_1g18990;XBXL10_1g18988;XBXL10_1g18989	M7(Oxidation)	1133.6	5.90417e+08	0	0.0003456	High	2.66216	2.74512	2.22286	High		High			0	641000660	94542430	0	0	0
	QGYQMVVYQEYHSSK	2	1	1	XBXL10_1g18988	M5(Oxidation)	1862.84	102455554	0	2.14e-07	High	5.3437	5.48238		High					0	102717642	0	0	0	0
	EYNGVWPK	8	2	2	XBXL10_1g18988;XBXL10_1g18989		992.483	969924452	0	0.002962	High	2.26035	1.9286	1.86245	High		High			0	994576393	1.01825e+08	0	0	0
	AQTFAFTR	5	1	1	XBXL10_1g18988		941.484	8.68614e+08	0	0.01049	High	2.31894	2.11214	1.68959	High		High			0	8.31877e+08	6.49221e+07	0	0	0
	KSQDVYDLQESSVGGICHTR	3	1	1	XBXL10_1g18988	C17(Carbamidomethyl)	2279.07	39212425	0	1.043e-10	High	6.02045	6.04813		High					1	26367820	0	0	0	0
	LTQALAEQLTKPAR	2	2	2	XBXL10_1g18988;XBXL10_1g18989		1539.89	86979789	0	1.26e-05	High	3.74425	3.79344		High					0	94785924	0	0	0	0
	QNIQFANFPMRK	2	1	1	XBXL10_1g18988	M10(Oxidation)	1509.76	0	0	0.01706	High	2.11639								1	0	0	0	0	0
	QGYQMVVYQEYHSSK	2	1	1	XBXL10_1g18988		1846.84	100206950	0	7.737e-07	High	4.26131	4.69349		High					0	7.15159e+07	0	0	0	0
	TCDVVIRIPR	5	1	1	XBXL10_1g18988	C2(Carbamidomethyl)	1228.68	4.63433e+08	0	0.0002003	High	2.68472	2.73977	2.22955	High		High			1	613114142	4.03836e+07	0	0	0
	SQDVYDLQESSVGGICHTR	7	1	1	XBXL10_1g18988	C16(Carbamidomethyl)	2150.98	561942116	0	1.327e-11	High	6.4951	6.40683	4.60865	High		High			0	531750187	42590891	0	0	0
	IQTDAVMALR	6	3	3	XBXL10_1g18988;XBXL10_1g18989;XBXL10_1g18990		1117.6	2.75046e+08	0	0.0002064	High	2.48542	2.5675		High					0	149181986	0	0	0	0
	RNTIFYQAVGEHDFK	2	1	1	XBXL10_1g18988		1824.9	1.54218e+08	0	2.436e-09	High	5.14766	5.16922		High					1	1.572e+08	0	0	0	0
	QVLAWVGSK	5	1	1	XBXL10_1g18988		987.562	9.85572e+08	0	0.002436	High	2.47718	2.29664	1.89405	High		High			0	950643838	8.37753e+07	0	0	0
	FTAFLDMK	2	1	1	XBXL10_1g18988	M7(Oxidation)	988.48	1.05637e+08	0	0.01074	High	1.59637	1.82746		High					0	1.13481e+08	0	0	0	0
	LLNGVVGQYAR	5	1	1	XBXL10_1g18988		1189.67	1143807542	0	0.0001314	High	3.05725	3.0096	2.76822	High		High			0	1150396864	104258545	0	0	0
	LQLEITAGPK	4	1	1	XBXL10_1g18988		1069.62	1.59131e+09	0	0.0007692	High	2.82564	2.19246		High					0	2377151558	0	0	0	0
	ALRLPVPIPVGHHAK	8	1	1	XBXL10_1g18988		1604.97	198885158	0	2.135e-05	High	3.36892	3.7278	3.16889	High		High			1	333511517	17553239	0	0	0
	GHYEDIALALK	11	1	1	XBXL10_1g18988		1229.65	863287462	0	0.0002557	High	3.65569	3.48242	3.54116	High		High			0	8.66569e+08	82207802	0	0	0
	VVGEYVPGAMYMMGFQGEYKR	2	1	1	XBXL10_1g18988	M10(Oxidation); M12(Oxidation); M13(Oxidation)	2460.1	4.01802e+07	0	4.194e-06	High	3.51372	2.67024		High					1	4.72561e+07	0	0	0	0
	GEGIEEFLRK	4	1	1	XBXL10_1g18988		1177.62	98380716	0	0.002477	High	2.14571	2.40109		High					1	9.95206e+07	0	0	0	0
	SGQLTPPQIQLK	8	1	1	XBXL10_1g18988		1309.75	1.43098e+09	0	0.0007404	High	2.51841	2.49478	2.19751	High		High			0	1.32283e+09	133126868	0	0	0
	QNIQFANFPMRK	1	1	1	XBXL10_1g18988		1493.77	0	0	4.338e-06	High	3.29382								1	0	0	0	0	0
	QQIQAYVMDISK	5	2	2	XBXL10_1g18988;XBXL10_1g18989	M8(Oxidation)	1439.72	1.88873e+08	0	5.934e-05	High	3.79401	3.12752	2.59021	High		High			0	1.87243e+08	14315767	0	0	0
	QNIQFANFPMR	2	1	1	XBXL10_1g18988	M10(Oxidation)	1381.67	88876499	0	0.001121	High	1.55394	1.906		High					0	7.50825e+07	0	0	0	0
	QVLQVTPFAER	5	1	1	XBXL10_1g18988		1287.71	910843364	0	5.833e-05	High	3.28216	3.61348	2.95462	High		High			0	866316262	5.28988e+07	0	0	0
	NTIFYQAVGEHDFK	9	1	1	XBXL10_1g18988		1668.8	5.80692e+08	0	8.864e-07	High	4.29753	4.68668	3.44759	High		High			0	4.91642e+08	40805270	0	0	0
	AAILAYGTMVR	3	1	1	XBXL10_1g18988		1165.64	5.88653e+07	0	0.01165	High	2.09982	2.14241		High					0	30401363	0	0	0	0
	LVFALSSPR	6	2	2	XBXL10_1g18988;XBXL10_1g18989		989.578	792273241	0	0.001902	High	2.36462	2.37832	2.19516	High		High			0	9.37651e+08	7.0798e+07	0	0	0
	EVIQNTIQALNQPAER	10	1	1	XBXL10_1g18988		1823.96	859428592	0	1.803e-07	High	5.78918	4.26435	3.63802	High		High			0	826070946	65410910	0	0	0
	IETPPFQQENHLVEIR	6	1	1	XBXL10_1g18988		1950.01	824945004	0	1.588e-07	High	5.34851	5.37152	3.72183	High		High			0	704722510	0	0	0	0
	ILNPSLDNLGYR	5	2	2	XBXL10_1g18988;XBXL10_1g18989		1374.74	1268096356	0	6.69e-06	High	2.58466	2.53438	3.12072	High		High			0	1229171264	7.27663e+07	0	0	0
	NFQISADLVQDSK	4	1	1	XBXL10_1g18988		1464.73	490463068	0	1.157e-05	High	2.8056	2.78119		High					0	428448928	0	0	0	0
	QQIQAYVMDISK	2	2	2	XBXL10_1g18988;XBXL10_1g18989		1423.73	182094388	0	7.705e-06	High	3.734	3.65085		High					0	108766377	0	0	0	0
	TIGLELAEFCHSCK	3	1	1	XBXL10_1g18988	C10(Carbamidomethyl); C13(Carbamidomethyl)	1664.78	151626720	0	3.573e-07	High	3.76092	3.62817		High					0	243639504	0	0	0	0
	SSVPHLEPLAAACSVALK	2	2	2	XBXL10_1g18988;XBXL10_1g18989	C13(Carbamidomethyl)	1849.99	0	0	1.611e-09	High	7.14891	5.82825		High					0	0	0	0	0	0
	GEGIEEFLR	1	1	1	XBXL10_1g18988		1049.52	0	0	0.01311	High	2.41974								0	0	0	0	0	0
	EPPVLVVTFK	2	1	1	XBXL10_1g18988		1128.67	97065639	0	0.001937	High	2.01275	1.68516		High					0	6.46126e+07	0	0	0	0
	TNLQLASFTFSQMK	2	1	1	XBXL10_1g18988	M13(Oxidation)	1631.81	165046600	0	3.036e-07	High	3.48194	3.63232		High					0	114677984	0	0	0	0
	RYCDQLSSCPEHALEPLHELAAEAANK	1	1	1	XBXL10_1g18988	C3(Carbamidomethyl); C9(Carbamidomethyl)	3109.45	86835007	0	1.69e-11	High	8.44053								1	0	0	0	0	0
	FLPGFSSSADQLPVR	9	1	1	XBXL10_1g18988		1620.84	2942564872	0	2.625e-07	High	3.98261	3.97031	3.04385	High		High			0	2.68234e+09	290195856	0	0	0
	YCDQLSSCPEHALEPLHELAAEAANK	3	1	1	XBXL10_1g18988	C2(Carbamidomethyl); C8(Carbamidomethyl)	2953.35	0	0	3.365e-07	High	6.25035	6.10039		High					0	167225745	0	0	0	0
	FLGDKEPPVLVVTFK	9	1	1	XBXL10_1g18988		1688.96	1.06529e+09	0	1.073e-06	High	5.16565	5.33787	3.13166	High		High			1	1.25488e+09	1.00858e+08	0	0	0
	LFGQEIAFTELNK	6	1	1	XBXL10_1g18988		1509.79	0	0	0.0003795	High	2.87054	3.42616	3.2939	High		High			0	1917859254	2.10406e+08	0	0	0
	ASNFENLQALWK	6	1	1	XBXL10_1g18988		1420.72	1693096755	0	2.411e-05	High	3.41064	3.45818	3.47781	High		High			0	1581500300	1.48276e+08	0	0	0
	TNLQLASFTFSQMK	3	1	1	XBXL10_1g18988		1615.81	106523178	0	2.271e-06	High	2.89383	3.72032		High					0	44456372	0	0	0	0
	GLPSQVPLISGYIK	8	1	1	XBXL10_1g18988		1471.85	1.50251e+09	0	5.123e-06	High	3.0336	3.31739	2.23681	High		High			0	1.41439e+09	132381024	0	0	0
	GILNLLQVTIKK	10	2	2	XBXL10_1g18988;XBXL10_1g18989		1339.87	536065778	0	0.009644	High	3.46108	3.27586	3.61857	High		High			1	858396926	8.09723e+07	0	0	0
	VQEILLQIFMDRDVR	5	2	2	XBXL10_1g18988;XBXL10_1g18989	M10(Oxidation)	1891.01	242575844	0	3.479e-05	High	3.50716	2.86343		High					1	1.96926e+08	0	0	0	0
	VGDIFVADDVSDTVANIYR	17	1	1	XBXL10_1g18988		2069.02	1546457655	0	3.128e-07	High	5.73693	6.11044	5.2237	High		High			0	1441551244	1.2174e+08	0	0	0
	FLQLVQLLR	8	1	1	XBXL10_1g18988		1129.71	1.54538e+09	0	0.0002779	High	2.3298	2.33973	2.7381	High		High			0	1.97722e+09	218603890	0	0	0
	QLIHNEELTTQEAAVLITFAMR	3	1	1	XBXL10_1g18988	M21(Oxidation)	2544.31	1.18953e+07	0	8.87e-09	High	6.20714	6.66589		High					0	64574815	0	0	0	0
	VFIMNSANTMFPVFILAK	4	1	1	XBXL10_1g18988	M4(Oxidation); M10(Oxidation)	2075.07	2.33428e+07	0	0.001846	High	3.28073	1.80752		High					0	0	0	0	0	0
	VQEILLQIFMDRDVR	4	2	2	XBXL10_1g18988;XBXL10_1g18989		1875.02	6.63027e+07	0	0.002047	High	2.94344	2.90694		High					1	68987587	0	0	0	0
	GILNLLQVTIK	5	2	2	XBXL10_1g18988;XBXL10_1g18989		1211.77	561722538	0	0.0001859	High	3.02644	3.02979	2.89472	High		High			0	7.56016e+08	6.7526e+07	0	0	0
	VQEILLQIFMDR	1	3	3	XBXL10_1g18988;XBXL10_1g18989;XBXL10_1g18990	M10(Oxidation)	1520.81	48639754	0	7.404e-06	High	2.76705								0	0	0	0	0	0
	ISVYNYEAVILNGFPESGLSR	11	1	1	XBXL10_1g18988		2328.19	344764499	0	7.951e-09	High	5.82355	5.44124	2.3319	High		High			0	309453466	0	0	0	0
	SPEAQAVEVLQHLVQDTQQHIREDAPAK	10	1	1	XBXL10_1g18988		3137.6	7.99969e+08	0	4.893e-13	High	9.20276	9.04996	5.42626	High		High			1	725563254	2.4537e+07	0	0	0
	SPEAQAVEVLQHLVQDTQQHIR	8	1	1	XBXL10_1g18988		2526.3	2.6377e+08	0	6.653e-13	High	9.12097	7.41043		High					0	264098022	0	0	0	0
	VQEILLQIFMDR	1	3	3	XBXL10_1g18990;XBXL10_1g18988;XBXL10_1g18989		1504.82	1.81662e+07	0	5.152e-06	High	2.96684								0	0	0	0	0	0
	ILNPSLDNLGYRYSK	1	2	2	XBXL10_1g18988;XBXL10_1g18989		1752.93	0	0	3.284e-07			4.30455		High					1	1.20999e+08	0	0	0	0
	KISQIVK	1	1	1	XBXL10_1g18988		815.535	197185340	0.001	0.0297	High	2.20901								1	0	0	0	0	0
	LTVYYR	3	1	1	XBXL10_1g18988		814.446	607906568	0.002	0.06926	High	1.56275	1.54404	1.64133	High		High			0	765971764	77288149	0	0	0
	KQNIQFANFPMR	1	1	1	XBXL10_1g18988	M11(Oxidation)	1509.76	0	0.004	0.1167	High	0.739914								1	0	0	0	0	0
	GRDQGTVIMEVTAR	1	1	1	XBXL10_1g18988	M9(Oxidation)	1548.78	0	0.006	0.1364			2.48579		High					1	1.99743e+07	0	0	0	0
	WGQNCQDYK	1	2	2	XBXL10_1g18988;XBXL10_1g18989	C5(Carbamidomethyl)	1198.49	59348638	0.008	0.2999	High	1.24763								0	0	0	0	0	0
CON_00798492.2	SWISS-PROT:P02535-1 Tax_Id=10090 Gene_Symbol=Krt10 Isoform 1 of Keratin, type I cytoskeletal 10	19.82	4	1	14	397	6.30677e+10	4.41507e+10	35161486845	2.48751e+10	4.08533e+10	3.32724e+10	234.658	19.82	14	87	177.338	19.82	14	68	151.694	142.216	145.568	132.06	14.21	15.79	15.79	15.79	12	13	13	13	60	63	62	57	570	57.7351	5.10986
	Sequence	# PSMs	# Proteins	# Protein Groups	Protein Group Accessions	Modifications	MH+ [Da]	A5: Area	q-Value	PEP	A6	XCorr A6	XCorr B6	XCorr C6	B6	XCorr D6	C6	XCorr E6	XCorr F6	# Missed Cleavages	B5: Area	C5: Area	D5: Area	E5: Area	F5: Area	D6	E6	F6
	VTMQNLNDR	17	13	8	CON_00217963.3;CON_IPI00328103.3;CON_00009865.2;CON_00384444.5;CON_00225378.3;CON_00798492.2;CON_IPI00418663.3;CON_00721270.3		1090.53	5634536621	0	0.002585	High	2.50245	1.92185	1.60108	High	1.64844	High	1.60811	2.01421	0	1152129504	1267228872	5.87505e+08	4.8586e+08	688406706	High	High	High
	VTMQNLNDR	25	13	8	CON_00217963.3;CON_IPI00328103.3;CON_00009865.2;CON_00384444.5;CON_00225378.3;CON_00798492.2;CON_IPI00418663.3;CON_00721270.3	M3(Oxidation)	1106.53	9863111330	0	0.08074	High	2.58102	2.61568	2.62295	High	2.64169	High	2.63705	2.64844	0	4699302517	2.20081e+09	3878612658	4334721004	5118874086	High	High	High
	IKEWYEK	11	6	5	CON_00009865.2;CON_00798492.2;CON_00698285.3;CON_00912554.1;XBXL10_1g38951		995.519	0	0	0.1027	High	1.67226	1.71723	1.77567	High	1.83061	High	1.83161	1.84758	1	1183595606	5.99349e+08	332223808	4.74372e+08	42052645	High	High	High
	SEITELR	16	4	4	CON_00009865.2;CON_00798492.2;CON_00912554.1;XBXL10_1g42200		847.45	1588151145	0	0.01522	High	1.84996	2.10419	1.87327	High	1.84898	High	1.87878	1.85938	0	1062894964	779639085	854085216	1577299310	823304597	High	High	High
	LAADDFR	34	52	18	CON_00217963.3;CON_00450768.7;CON_109456;CON_00009865.2;CON_00136056.1;CON_00798492.2;CON_00912554.1;CON_18266793;CON_00384444.5;CON_00225378.3;CON_IPI00290077.1;CON_00721270.3;CON_IPI00418663.3;CON_00698285.3;CON_00708921.1;XBXL10_1g8279;XBXL10_1g38935;XBXL10_1g42200		807.4	8.7171e+10	0	0.01073	High	1.85348	2.01395	1.96806	High	1.91594	High	1.85693	1.89971	0	5.03039e+10	41248418266	2.78356e+10	45688204091	43680490412	High	High	High
	LENEIQTYR	12	3	3	CON_00009865.2;CON_00798492.2;CON_00912554.1		1165.58	2030885533	0	0.0004119	High	3.50167	2.83593	2.85261	High	2.83196	High	2.84944	2.84067	0	1.07453e+09	880996218	653748193	1320428013	1030995404	High	High	High
	ALEESNYELEGK	28	2	2	CON_00009865.2;CON_00798492.2		1381.65	44507471200	0	0.01119	High	3.03643	2.92519	2.96379	High	3.36044	High	3.07958	3.01086	0	39950860776	29499274868	25285256972	40506616808	25355567392	High	High	High
	VRALEESNYELEGK	94	2	2	CON_00009865.2;CON_00798492.2		1636.82	31700959264	0	0.005478	High	5.2388	5.117	5.01883	High	5.28457	High	5.31317	5.10761	1	27190765041	25815324098	15263748170	19568606642	15558175022	High	High	High
	QSVEADINGLRR	47	9	5	CON_00009865.2;CON_00009866.6;CON_00136056.1;CON_00798492.2;CON_00912554.1		1357.72	57524544836	0	0.04229	High	3.26707	3.31283	3.32336	High	3.25643	High	3.37518	3.33663	1	42197467170	34736767401	2.15045e+10	3.63652e+10	30781234112	High	High	High
	LAADDFRLK	10	19	10	CON_00009865.2;CON_00136056.1;CON_00798492.2;CON_00912554.1;CON_00225378.3;CON_IPI00290077.1;CON_IPI00418663.3;CON_00698285.3;XBXL10_1g42200;CON_18266793		1048.58	68838516	0	0.0001208	High	1.87086	2.4655	2.54109	High	2.37424	High	2.37455	2.30443	1	3719205489	5.7049e+09	1.80482e+09	1.25339e+09	0	High	High	High
	QSVEADINGLR	24	10	5	CON_00009865.2;CON_00136056.1;CON_00798492.2;CON_00912554.1;CON_00009866.6		1201.62	6887530214	0	0.0004507	High	2.66978	2.44976	1.97447	High	1.56599	High	1.90262	1.84655	0	3.99556e+09	3.4347e+09	2.09956e+09	4041833371	3103401748	High	High	High
	QSLEASLAETEGR	57	3	3	CON_00009865.2;CON_00798492.2;CON_00912554.1		1390.68	13934302480	0	0.008017	High	3.85419	3.25087	3.70078	High	3.50174	High	3.38829	3.8547	0	11365581008	4089475202	4529935584	7310016248	6001310992	High	High	High
	VLDELTLSK	7	3	2	CON_00009866.6;CON_00798492.2		1017.58	30178382	0	0.003592	High	1.28615	2.30494		High	1.2045		1.29864	1.07006	0	296238808	0	2.68377e+07	1.98116e+08	1.56503e+07	High	High	High
	YCVQLSQIQSQISALEEQLQQIR	4	1	1	CON_00798492.2	C2(Carbamidomethyl)	2762.41	1.90086e+07	0	9.127e-07	High	3.44848	2.447		High					0	8.619e+06	0	0	0	0
	SEITELRR	11	4	4	CON_00009865.2;CON_00798492.2;CON_00912554.1;XBXL10_1g42200		1003.55	21183379928	0.001	0.1592	High	1.87412	2.09814	1.94207	High	1.95835	High	1.98782	1.74336	1	14821351708	1.27354e+10	7997727818	1.25285e+10	9.09296e+09	High	High	High
CON_00622240.4	SWISS-PROT:Q3TTY5 Tax_Id=10090 Gene_Symbol=Krt2 Keratin, type II cytoskeletal 2 epidermal	13.86	3	3	18	388	18329636916	1.37737e+10	1.52455e+10	1.05153e+10	1.20342e+10	1.11031e+10	150.916	10.04	14	59	170.214	11.03	15	67	167.263	160.405	162.161	128.077	10.89	9.48	10.89	11.46	15	14	15	15	68	67	66	61	707	70.8798	8.06006
	Sequence	# PSMs	# Proteins	# Protein Groups	Protein Group Accessions	Modifications	MH+ [Da]	A5: Area	q-Value	PEP	A6	XCorr A6	XCorr B6	XCorr C6	B6	XCorr D6	C6	XCorr E6	XCorr F6	# Missed Cleavages	B5: Area	C5: Area	D5: Area	E5: Area	F5: Area	D6	E6	F6
	KKYEDEINK	6	13	6	CON_IPI00290857.2;CON_00021304.1;CON_00622240.4;XBXL10_1g10877;XBXL10_1g10870;XBXL10_1g10871		1166.61	1.01709e+08	0	0.0007587	High	3.75651	3.14547	2.61658	High	2.3219	High	2.42239	2.24733	2	5.70149e+07	8.96492e+07	3.29458e+07	4.33166e+07	3.82106e+07	High	High	High
	YEDEINKR	24	40	19	CON_IPI00290857.2;CON_00300725.7;CON_IPI00554648.3;CON_00009867.3;CON_00299145.9;CON_00220327.3;CON_00021304.1;CON_00293665.7;CON_00697851.1;CON_00221797.1;CON_00462140.1;CON_00622240.4;CON_IPI00376379.3;XBXL10_1g8295;XBXL10_1g8289;XBXL10_1g8291;XBXL10_1g10877;XBXL10_1g10870;XBXL10_1g10871		1066.52	6456119504	0	0.008032	High	1.96031	1.94761	1.86407	High	1.85402	High	1.82619	1.92686	1	4.07321e+09	3694448402	4304846388	4.86375e+09	3934580898	High	High	High
	KYEDEINKR	42	14	6	CON_IPI00290857.2;CON_00021304.1;CON_00622240.4;XBXL10_1g10877;XBXL10_1g10870;XBXL10_1g10871		1194.61	8817102704	0	0.02105	High	3.30522	3.34471	3.37958	High	3.33172	High	3.41911	3.17416	2	6.6859e+09	6.52491e+09	5.11005e+09	7.16632e+09	5.6767e+09	High	High	High
	KYEDEINK	12	14	6	CON_IPI00290857.2;CON_00021304.1;CON_00622240.4;XBXL10_1g10877;XBXL10_1g10870;XBXL10_1g10871		1038.51	2.42849e+09	0	0.0007574	High	3.09885	2.70109	2.76645	High	2.53451	High	2.77319	2.76411	1	1330350488	1.68288e+09	9.31537e+08	1.1934e+09	1.06234e+09	High	High	High
	YEDEINK	32	43	20	CON_IPI00290857.2;CON_00300725.7;CON_IPI00554648.3;CON_00009867.3;CON_00299145.9;XBXL10_1g8291;CON_00220327.3;CON_00021304.1;CON_00293665.7;CON_00697851.1;CON_00221797.1;CON_00462140.1;CON_00622240.4;CON_IPI00376379.3;CON_IPI00241841.9;XBXL10_1g8295;XBXL10_1g8289;XBXL10_1g10877;XBXL10_1g10870;XBXL10_1g10871		910.416	15922380192	0	0.01896	High	2.1327	2.12545	1.91357	High	1.77495	High	1.92556	1.81321	0	8.65848e+09	11362991318	9786637980	9.7915e+09	9.50114e+09	High	High	High
	KLLEGEECR	19	27	11	CON_00300725.7;CON_00009867.3;CON_00299145.9;CON_IPI00174775.2;CON_00021304.1;CON_00293665.7;CON_00697851.1;CON_00221797.1;CON_00622240.4;XBXL10_1g10877;XBXL10_1g8289	C8(Carbamidomethyl)	1133.56	1.51246e+08	0	0.01377	High	2.70506	2.74776	2.88956	High	2.74487	High	2.70547	2.45344	1	1.94911e+08	197230801	1.65718e+08	2.6809e+08	1.23714e+08	High	High	High
	LQGEISHVK	2	1	1	CON_00622240.4		1010.56	2.6252e+07	0	0.003588	High	1.79496							1.41767	0	0	0	0	0	14916766			High
	LLEGEECR	21	28	12	CON_00300725.7;CON_00009867.3;CON_00299145.9;CON_IPI00174775.2;CON_00166205.2;CON_00021304.1;CON_00293665.7;CON_00697851.1;CON_00221797.1;CON_00622240.4;XBXL10_1g10877;XBXL10_1g8289	C7(Carbamidomethyl)	1005.47	5.60345e+09	0	0.02935	High	2.10841	2.09917	2.11088	High	2.11073	High	2.11532	2.10963	0	5.59857e+09	5.17908e+09	3.26645e+09	4.908e+09	2.35489e+09	High	High	High
	GFSSGSAVVSGGSRR	19	2	2	CON_00021304.1;CON_00622240.4		1410.71	2234461700	0	0.04832	High	3.04794	2.87613	3.68222	High	3.16595	High	3.48301	3.17411	1	1.29802e+09	1590918225	8.5732e+08	1.43176e+09	1.1997e+09	High	High	High
	DYQELMNTK	19	3	2	CON_00220327.3;CON_00622240.4	M6(Oxidation)	1157.52	790685177	0	0.1067	High	1.96786	1.98404	1.92719	High	1.98084	High	2.27475	2.24559	0	505253168	458014840	469054760	558256514	4.16982e+08	High	High	High
	VDPEIQNVK	24	3	2	CON_00021304.1;CON_00622240.4		1041.56	7187634792	0	0.05699	High	2.1287	2.31401	2.17732	High	2.32595	High	2.32989	2.25541	0	5023066816	4888600760	3561967396	6886912168	4155503136	High	High	High
	GFSSGSAVVSGGSR	17	2	2	CON_00021304.1;CON_00622240.4		1254.61	5258625530	0	0.0003079	High	3.1757	3.94265	3.08079	High	4.0485	High	3.16639	3.25963	0	2467688696	2593866360	1.85208e+09	4.13316e+09	2.88217e+09	High	High	High
	LLRDYQELMNTK	42	3	2	CON_00220327.3;CON_00622240.4	M9(Oxidation)	1539.78	18176601904	0	1.395e-06	High	4.91678	4.37734	4.54507	High	4.57762	High	4.58374	4.69295	1	15995938800	1.61018e+10	1.11384e+10	1.08163e+10	1.18432e+10	High	High	High
	LLRDYQELMNTK	37	3	2	CON_00220327.3;CON_00622240.4		1523.79	14590975450	0	7.247e-07	High	4.36333	4.23579	4.13437	High	4.25325	High	4.25516	4.17633	1	5318336830	6905286970	2.31813e+09	1.84793e+09	2510607427	High	High	High
	DYQELMNTK	12	3	2	CON_00220327.3;CON_00622240.4		1141.52	731747446	0	0.004914	High	1.84347	1.78792	1.77384	High	1.73417	High	1.73565	1.82681	0	2.40114e+08	210743284	9.47309e+07	52862261	1.22065e+08	High	High	High
	FASFIDK	17	52	24	CON_IPI00290857.2;CON_00300725.7;CON_IPI00554648.3;CON_IPI00306959.10;CON_00009867.3;CON_00299145.9;CON_IPI00174775.2;XBXL10_1g8291;CON_105456;CON_IPI00290078.5;CON_00021304.1;CON_00293665.7;CON_00697851.1;CON_00221797.1;CON_00347096.2;CON_00462140.1;CON_00622240.4;CON_IPI00376379.3;CON_IPI00241841.9;CON_00705721.2;XBXL10_1g8295;XBXL10_1g8290;XBXL10_1g10877;XBXL10_1g8289		827.43	20889928652	0	0.01631	High	1.92991	1.93893	1.85944	High	1.86668	High	1.68189	1.85885	0	16666804464	18271764520	10620704572	15494635570	1.1965e+10	High	High	High
	LSLDVEIATYR	1	6	4	CON_00166205.2;CON_00462140.1;CON_00622240.4;CON_IPI00376379.3		1279.69	0	0	5.955e-05			2.80685		High					0	0	0	0	0	0
	EDLARLLRDYQELMNTK	29	2	2	CON_00220327.3;CON_00622240.4	M14(Oxidation)	2124.08	0	0	0.001055			3.97308	4.19185	High	4.28191	High	3.96741		2	2.72616e+08	221679603	5.77739e+08	270168442	0	High	High
	EDLARLLRDYQELMNTK	10	2	2	CON_00220327.3;CON_00622240.4		2108.08	0	0	0.01103			3.59122	2.97928	High	3.55594	High	3.45486		2	134715464	5.47726e+07	2.34875e+08	1.68158e+08	0	High	High
	LQGEISHVKK	2	1	1	CON_00622240.4		1138.66	0	0.004	0.2216				1.20235			High	1.36794		1	0	36057435	0	2.51794e+07	0		High
	AESEELYHSK	1	1	1	CON_00622240.4		1192.54	0	0.008	0.3306									1.29989	0	0	0	0	0	4.99334e+07			High
XBXL10_1g18990	XBmRNA35014| vtgb1.L	43.75	1	55	81	387	2.33424e+09	2.17928e+09	2.21573e+08	0	0	0	545.023	41.39	72	170	533.458	41.88	78	171	116.861				22.23				34				46				1817	202.99	8.93896
	Sequence	# PSMs	# Proteins	# Protein Groups	Protein Group Accessions	Modifications	MH+ [Da]	A5: Area	q-Value	PEP	A6	XCorr A6	XCorr B6	XCorr C6	B6	XCorr D6	C6	XCorr E6	XCorr F6	# Missed Cleavages	B5: Area	C5: Area	D5: Area	E5: Area	F5: Area	D6	E6	F6
	SRDFDRCESR	2	1	1	XBXL10_1g18990	C7(Carbamidomethyl)	1327.58	2.62863e+07	0	0.01275	High	2.97954	2.77816		High					2	3.17221e+07	0	0	0	0
	LNTVQGDR	2	1	1	XBXL10_1g18990		902.47	3.42191e+07	0	0.0106	High	1.9271	2.21654		High					0	3.44506e+07	0	0	0	0
	NPHEAQAELK	5	2	2	XBXL10_1g18990;XBXL10_1g21498		1136.57	2.47397e+08	0	0.0005226	High	2.76668	2.5621	2.15999	High		High			0	288386029	18305234	0	0	0
	QHGPSTMEQHFEK	6	1	1	XBXL10_1g18990	M7(Oxidation)	1571.69	1.41841e+08	0	7.943e-06	High	4.08301	3.12471	2.23965	High		High			0	1.2707e+08	2.3148e+07	0	0	0
	IETPPCQR	4	1	1	XBXL10_1g18990	C6(Carbamidomethyl)	1000.49	215777238	0	0.004031	High	2.0046	2.04901		High					0	150231815	0	0	0	0
	HQMFAVTR	4	2	2	XBXL10_1g18990;XBXL10_1g21498	M3(Oxidation)	1005.49	70822605	0	0.01042	High	2.05779	2.3193		High					0	5.58425e+07	0	0	0	0
	AIGNAGQPASIKR	7	2	2	XBXL10_1g18990;XBXL10_1g21498		1282.72	8.02497e+08	0	0.0001911	High	2.96653	3.07662	2.58036	High		High			1	7.50266e+08	0	0	0	0
	QHGPSTMEQHFEK	3	1	1	XBXL10_1g18990		1555.7	82857760	0	0.0001055	High	3.23816	2.03088		High					0	0	0	0	0	0
	VSESQVQLTKR	2	1	1	XBXL10_1g18990		1274.71	4.75493e+07	0	0.0004633	High	2.49862	2.85281		High					1	3.44742e+07	0	0	0	0
	AEISGYAQR	3	1	1	XBXL10_1g18990		994.495	189949964	0	0.001319	High	1.72829	2.14646	1.6546	High		High			0	2.06874e+08	0	0	0	0
	LLNEPAER	4	2	2	XBXL10_1g18990;XBXL10_1g21498		941.505	1.10131e+09	0	0.007273	High	2.29306	1.94907	1.95163	High		High			0	1.04468e+09	85766422	0	0	0
	SNRVSESQVQLTK	4	1	1	XBXL10_1g18990		1475.78	149535109	0	2.325e-05	High	5.0404	5.27691		High					1	260219142	0	0	0	0
	AIGNAGQPASIK	4	2	2	XBXL10_1g18990;XBXL10_1g21498		1126.62	1.1443e+09	0	4.124e-05	High	2.7939	2.71758	2.61688	High		High			0	1138270690	133742540	0	0	0
	GSATFTYK	2	1	1	XBXL10_1g18990		874.431	187814440	0	0.006048	High	2.05225	1.96019		High					0	173237456	0	0	0	0
	VSESQVQLTK	3	1	1	XBXL10_1g18990		1118.61	506488383	0	0.0002158	High	2.67565	2.30757	2.56606	High		High			0	3.48538e+08	30813882	0	0	0
	HQMFAVTR	3	2	2	XBXL10_1g18990;XBXL10_1g21498		989.496	0	0	0.002448	High	1.79974	2.03413		High					0	3.86691e+07	0	0	0	0
	ACAEAFVR	4	1	1	XBXL10_1g18990	C2(Carbamidomethyl)	923.44	266570280	0	0.004348	High	2.23848	2.24427		High					0	183775730	0	0	0	0
	NAQHQHILNNVESYR	4	1	1	XBXL10_1g18990		1822.9	382167072	0	1.64e-08	High	5.00947	4.84909		High					0	323643842	0	0	0	0
	AEGLQEVIRK	4	2	2	XBXL10_1g18990;XBXL10_1g21498		1142.65	223381330	0	0.000599	High	2.83408	2.80874		High					1	1.66293e+08	0	0	0	0
	KSPTVVITAQAVR	3	1	1	XBXL10_1g18990		1369.81	99098379	0	0.0003055	High	4.11281	3.10048		High					1	1.3551e+08	0	0	0	0
	KSPTVVITAQAVRNDNVK	4	1	1	XBXL10_1g18990		1940.09	127159636	0	5.227e-11	High	6.32622	5.72886		High					2	2.03588e+08	0	0	0	0
	LQTDAVMALR	9	3	3	XBXL10_1g18990;XBXL10_1g18988;XBXL10_1g18989	M7(Oxidation)	1133.6	5.90417e+08	0	0.0003456	High	2.66216	2.74512	2.22286	High		High			0	641000660	94542430	0	0	0
	ACAEAFVRNPHEAQAELK	4	1	1	XBXL10_1g18990	C2(Carbamidomethyl)	2040.99	108293086	0	2.939e-05	High	4.85314	5.089		High					1	159710562	0	0	0	0
	DQGALIVEASAK	6	2	2	XBXL10_1g18990;XBXL10_1g21498		1201.64	80894380	0	9.895e-05	High	2.83587	2.97579		High					0	74938574	0	0	0	0
	EVELVTVR	4	1	1	XBXL10_1g18990		944.54	433746840	0	0.002649	High	1.69574	2.02282	1.70215	High		High			0	455580080	0	0	0	0
	LNINACLQSK	4	2	2	XBXL10_1g18990;XBXL10_1g21498	C6(Carbamidomethyl)	1160.61	282465696	0	0.0004481	High	2.81961	3.23955		High					0	325149008	0	0	0	0
	AEGLQEVIR	4	2	2	XBXL10_1g18990;XBXL10_1g21498		1014.56	356975472	0	0.001265	High	2.5252	2.61293		High					0	313520428	0	0	0	0
	SPTVVITAQAVRNDNVK	7	1	1	XBXL10_1g18990		1812	298874301	0	6.005e-08	High	6.20358	6.01223	2.55627	High		High			1	409527792	28707859	0	0	0
	LQVEITAGPR	7	1	1	XBXL10_1g18990		1083.62	1134606304	0	0.0004662	High	2.34191	2.57676	1.98247	High		High			0	1281733472	162439368	0	0	0
	QILTLAETK	5	2	2	XBXL10_1g18990;XBXL10_1g21498		1016.6	1052175150	0	0.002225	High	2.6317	2.51132	2.24587	High		High			0	1020966882	115297807	0	0	0
	SPTVVITAQAVR	2	1	1	XBXL10_1g18990		1241.72	362454029	0	3.656e-05	High	3.19795	2.92079		High					0	3.12968e+08	0	0	0	0
	LSQILAEHLTRPVK	6	1	1	XBXL10_1g18990		1604.95	272030616	0	7.65e-05	High	4.51709	4.2023		High					0	2.87179e+08	0	0	0	0
	FLLKPTQNEPAIEK	11	1	1	XBXL10_1g18990		1627.91	1.82803e+09	0	9.492e-08	High	5.07116	4.65668	4.25369	High		High			0	1.75172e+09	204236275	0	0	0
	FLPGFSSGASR	5	2	2	XBXL10_1g18990;XBXL10_1g21498		1125.57	1.22985e+09	0	0.00025	High	1.96667	1.76111	1.46712	High		High			0	1175442014	113685986	0	0	0
	SQNVYDLQEDSISGVCHTK	7	2	2	XBXL10_1g18990;XBXL10_1g21498	C16(Carbamidomethyl)	2180	4.74922e+08	0	1.155e-09	High	5.66799	5.45193	2.32017	High		High			0	450014836	0	0	0	0
	LQTDAVMALR	6	3	3	XBXL10_1g18988;XBXL10_1g18989;XBXL10_1g18990		1117.6	2.75046e+08	0	0.0002064	High	2.48542	2.5675		High					0	149181986	0	0	0	0
	QGYQVILYTDDTTRPK	12	2	2	XBXL10_1g18990;XBXL10_1g21498		1897.97	1336031426	0	3.062e-09	High	5.50183	5.29053	4.32026	High		High			0	1.39222e+09	102699618	0	0	0
	LLGQEVNFNQATR	7	1	1	XBXL10_1g18990		1489.78	2.11743e+09	0	4.446e-07	High	3.45594	3.40998	3.0899	High		High			0	1658581997	167596694	0	0	0
	IGVAYLETCTQCK	4	1	1	XBXL10_1g18990	C9(Carbamidomethyl); C12(Carbamidomethyl)	1542.73	186984080	0	6.22e-06	High	4.29882	3.9394		High					0	1.68884e+08	0	0	0	0
	SQYEPFFSESK	6	2	2	XBXL10_1g18990;XBXL10_1g21498		1348.6	7.83333e+08	0	1.72e-05	High	2.77677	2.36376	1.96515	High		High			0	766343124	5.95069e+07	0	0	0
	QNIQFSEFSMHK	1	1	1	XBXL10_1g18990		1495.7	3.17403e+07	0	0.0004236	High	2.78403								0	0	0	0	0	0
	DNMQLASFTYSHIK	5	1	1	XBXL10_1g18990	M3(Oxidation)	1670.79	166278832	0	6.501e-07	High	3.87648	4.50232		High					0	1.52735e+08	0	0	0	0
	TTNQENIQAIWK	8	1	1	XBXL10_1g18990		1445.74	1.50359e+09	0	5.298e-06	High	3.7281	3.80696	2.96395	High		High			0	1443211595	1.73345e+08	0	0	0
	MQAYLVDITGK	4	1	1	XBXL10_1g18990	M1(Oxidation)	1254.64	182023392	0	0.0003223	High	3.4801	3.33459		High					0	1.89572e+08	0	0	0	0
	EAPANVPLVSASIK	8	2	2	XBXL10_1g18990;XBXL10_1g21498		1395.78	1594920330	0	2.428e-05	High	2.96981	2.1307	1.90161	High		High			0	1603219202	1.53167e+08	0	0	0
	SFLYENIGEHEIK	7	1	1	XBXL10_1g18990		1578.78	8.12835e+08	0	4.973e-06	High	3.91318	2.89893	2.69659	High		High			0	863508836	7.83529e+07	0	0	0
	AVEIAADLVTDSR	4	1	1	XBXL10_1g18990		1359.71	418208967	0	2.643e-05	High	3.41724	3.39375		High					0	437344378	0	0	0	0
	LSQILAEHLTRPVKFEYR	2	1	1	XBXL10_1g18990		2200.22	5.30779e+07	0	2.307e-05	High	2.153	4.08002		High					1	121591646	0	0	0	0
	EFNGLWPK	9	2	2	XBXL10_1g18990;XBXL10_1g21498		990.504	6.99392e+08	0	0.003615	High	1.63253	1.60669	1.36217	High		High			0	862646028	0	0	0	0
	FLPGFSSGASRLPVR	3	1	1	XBXL10_1g18990		1590.87	340535742	0	0.01491	High	2.34314	2.35317	2.26073	High		High			1	646833104	0	0	0	0
	MQAYLVDITGK	2	1	1	XBXL10_1g18990		1238.65	175382560	0	2.377e-05	High	2.9684	2.84549		High					0	93151963	0	0	0	0
[truncated: 5,079 more rows]

## Sheet: params
Search report summary of file(s):
[truncated: 1,682 more rows]
